# Supplementary material for: The Avian Collection of the Zoological Museum of the University of Athens (ZMUA)
Source: Biodivers Data J. 2016 Nov 1;(4):e10598. doi: 10.3897/BDJ.4.e10598 (PMC5136676; doi:10.3897/BDJ.4.e10598)
Supplement: Supplementary material 1 — ZMUA_Aves [file biodiversity_data_journal-4-e10598-s001.xlsx]

## Sheet: ZMUA_AVES
institutionCode	collectionCode	datasetName	ownerInstitutionCode	basisOfRecord	occurrenceID	catalogNumber	recordedBy	individualCount	sex	lifeStage	preparation	eventDate	fieldNumber	country	countryCode	locality	locationRemarks	decimalLatitude	decimalLongitude	coordinateUncertaintyInMeters	identifiedBy	scientificNameID	scientificName	kingdom	phylum	class	order	family	genus	specificEpithet	scientificNameAuthorship	nomenclaturalCode	taxonRemarks
ZMUA	AVSE	ZMUA_Aves	ZMUA	PreservedSpecimen	1209-804	GR-ZMUA_Aves-1209-804	Schrader G.	1			Whole animal (Stuffed)	1900-01-04	1209	Eritrea	GR	Abyssinia (Ali-Beret)	Coordinates for Eritrea, according to: http://ids.lib.harvard.edu/ids/view/15109859?buttons=y	14.7799	40.3983	452791	Shogolev Igor	urn:lsid:catalogueoflife.org:taxon:eded9933-18fd-11e5-9774-bc764e0806fb:col20150623	Lybius guifsobalito	Animalia	Chordata	Aves	Piciformes	Ramphastidae	Lybius	guifsobalito	Hermann, 1783	ICZN	Lybius guifsobalito
ZMUA	AVSE	ZMUA_Aves	ZMUA	PreservedSpecimen	2592-2187	GR-ZMUA_Aves-2592-2187	Schrader G.	1	M	adult	Whole animal (Stuffed)	1900-01-05	2592	Eritrea	GR	Abyssinia (Ali-Beret)	Coordinates for Eritrea, according to: http://ids.lib.harvard.edu/ids/view/15109859?buttons=y	14.7799	40.3983	452791	Shogolev Igor	urn:lsid:catalogueoflife.org:taxon:e7c83196-18fd-11e5-9774-bc764e0806fb:col20150807	Thamnolaea cinnamomeiventris	Animalia	Chordata	Aves	Passeriformes	Muscicapidae	Thamnolaea	cinnamomeiventris	(Lafresnaye, 1836)	ICZN	Thamnolea cinnamomeiventris
ZMUA	AVSE	ZMUA_Aves	ZMUA	PreservedSpecimen	592-187	GR-ZMUA_Aves-592-187		1			Whole animal (Stuffed)		592		GR						Shogolev Igor	urn:lsid:catalogueoflife.org:taxon:f372b1db-18fd-11e5-9774-bc764e0806fb:col20150623	Accipiter nisus	Animalia	Chordata	Aves	Accipitriformes	Accipitridae	Accipiter	nisus	(Linnaeus, 1758)	ICZN	Accipiter nisus
ZMUA	AVSE	ZMUA_Aves	ZMUA	PreservedSpecimen	811-406	GR-ZMUA_Aves-811-406	Schrader G.	1	F	adult	Whole animal (Stuffed)	1900-01-08	811	Eritrea	GR	Abyssinia (Ali-Beret)	Coordinates for Eritrea, according to: http://ids.lib.harvard.edu/ids/view/15109859?buttons=y	14.7799	40.3983	452791	Shogolev Igor	urn:lsid:catalogueoflife.org:taxon:ee256d27-18fd-11e5-9774-bc764e0806fb:col20150623	Francolinus clappertoni	Animalia	Chordata	Aves	Galliformes	Phasianidae	Francolinus	clappertoni	Children & Vigors, 1826	ICZN	Francolinus clappertoni Children, 1826
ZMUA	AVSE	ZMUA_Aves	ZMUA	PreservedSpecimen	1335-930	GR-ZMUA_Aves-1335-930	Schrader G.	1	M	adult	Whole animal (Stuffed)	1900-01-10	1335	Eritrea	GR	Abyssinia (Ali-Beret)	Coordinates for Eritrea, according to: http://ids.lib.harvard.edu/ids/view/15109859?buttons=y	14.7799	40.3983	452791	Shogolev Igor	urn:lsid:catalogueoflife.org:taxon:f6c06f2c-18fd-11e5-9774-bc764e0806fb:col20150807	Tauraco leucotis	Animalia	Chordata	Aves	Musophagiformes	Musophagidae	Tauraco	leucotis	(Rüppell, 1835)	ICZN	Tauraco leucotis
ZMUA	AVSE	ZMUA_Aves	ZMUA	PreservedSpecimen	1868-1463	GR-ZMUA_Aves-1868-1463	Schrader G.	1	F	adult	Whole animal (Stuffed)	1900-01-15	1868	Eritrea	GR	Abyssinia (Ali-Beret)	Coordinates for Eritrea, according to: http://ids.lib.harvard.edu/ids/view/15109859?buttons=y	14.7799	40.3983	452791	Shogolev Igor	urn:lsid:catalogueoflife.org:taxon:e7c75f05-18fd-11e5-9774-bc764e0806fb:col20150623	Lamprotornis chalybaeus	Animalia	Chordata	Aves	Passeriformes	Sturnidae	Lamprotornis	chalybaeus	Hemprich & Ehrenberg, 1828	ICZN	Lamprotornis chalybaeus
ZMUA	AVSE	ZMUA_Aves	ZMUA	PreservedSpecimen	1639-1234	GR-ZMUA_Aves-1639-1234	Schrader G.	1	F	adult	Whole animal (Stuffed)	1900-01-19	1639		GR	Abyssinia	Even though Eritrea belonged to Italy back when Shrader had visited the area, the collector was refering to it as Ethiopia. Therefore it is very probable that the location is in todays Eritrea.	10.6657	39.783	664046	Shogolev Igor	urn:lsid:catalogueoflife.org:taxon:f6bd78d7-18fd-11e5-9774-bc764e0806fb:col20150623	Crinifer zonurus	Animalia	Chordata	Aves	Musophagiformes	Musophagidae	Crinifer	zonurus	(Rüppell, 1835)	ICZN	Crinifer zonurus
ZMUA	AVSE	ZMUA_Aves	ZMUA	PreservedSpecimen	2586-2181	GR-ZMUA_Aves-2586-2181	Schrader G.	1	F	adult	Whole animal (Stuffed)	1900-01-21	2586	Eritrea	GR	Abyssinia (Ali-Beret)	Coordinates for Eritrea, according to: http://ids.lib.harvard.edu/ids/view/15109859?buttons=y	14.7799	40.3983	452791	Shogolev Igor	urn:lsid:catalogueoflife.org:taxon:e7c83196-18fd-11e5-9774-bc764e0806fb:col20150807	Thamnolaea cinnamomeiventris	Animalia	Chordata	Aves	Passeriformes	Muscicapidae	Thamnolaea	cinnamomeiventris	(Lafresnaye, 1836)	ICZN	Thamnolea cinnamomeiventris
ZMUA	AVSE	ZMUA_Aves	ZMUA	PreservedSpecimen	1003-598	GR-ZMUA_Aves-1003-598	Schrader G.	1	F	adult	Whole animal (Stuffed)	1900-01-26	1003	Eritrea	GR	Abyssinia (Ali-Beret)	Coordinates for Eritrea, according to: http://ids.lib.harvard.edu/ids/view/15109859?buttons=y	14.7799	40.3983	452791	Shogolev Igor	urn:lsid:catalogueoflife.org:taxon:f695e9c4-18fd-11e5-9774-bc764e0806fb:col20150623	Bubo lacteus	Animalia	Chordata	Aves	Strigiformes	Strigidae	Bubo	lacteus	(Temminck, 1820)	ICZN	Bubo lacteus Temminck, 1820
ZMUA	AVSE	ZMUA_Aves	ZMUA	PreservedSpecimen	1104-699	GR-ZMUA_Aves-1104-699	Schrader G.	1	M	adult	Whole animal (Stuffed)	1900-02-14	1104	Eritrea	GR	Abyssinia (Salamona)	Coordinates according to: http://books.google.gr/books?id=Xl1LrRfh6YYC&pg=PA312&lpg=PA312&dq=salamona+eritrea&source=bl&ots=KtNtDaxzxU&sig=_4aHyygymlNZ7oI1_SW3B2D3CyI&hl=el&sa=X&ei=xxD_U-yADoHjaKCSgbAJ&ved=0CC0Q6AEwAjgK#v=onepage&q=salamona%20&f=false	15.5945	39.2049		Shogolev Igor	urn:lsid:catalogueoflife.org:taxon:f3a2bb50-18fd-11e5-9774-bc764e0806fb:col20150623	Buteo augur	Animalia	Chordata	Aves	Accipitriformes	Accipitridae	Buteo	augur	(Rüppell, 1836)	ICZN	Buteo augur Rüppell, 1836
ZMUA	AVSE	ZMUA_Aves	ZMUA	PreservedSpecimen	1089-684	GR-ZMUA_Aves-1089-684	Schrader G.	1	F	adult	Whole animal (Stuffed)	1900-02-18	1089		GR	Abyssinia	Even though Eritrea belonged to Italy back when Shrader had visited the area, the collector was refering to it as Ethiopia. Therefore it is very probable that the location is in todays Eritrea.	10.6657	39.783	664046	Shogolev Igor	urn:lsid:catalogueoflife.org:taxon:eb8a81d0-18fd-11e5-9774-bc764e0806fb:col20150623	Lophaetus occipitalis	Animalia	Chordata	Aves	Accipitriformes	Accipitridae	Lophaetus	occipitalis	(Daudin, 1800)	ICZN	Lophaetus occipitalis, Daudin 1800
ZMUA	AVSE	ZMUA_Aves	ZMUA	PreservedSpecimen	809-404	GR-ZMUA_Aves-809-404	Schrader G.	1	M	adult	Whole animal (Stuffed)	1900-02-20	809	Eritrea	GR	Abyssinia (Salamona)	Coordinates according to: http://books.google.gr/books?id=Xl1LrRfh6YYC&pg=PA312&lpg=PA312&dq=salamona+eritrea&source=bl&ots=KtNtDaxzxU&sig=_4aHyygymlNZ7oI1_SW3B2D3CyI&hl=el&sa=X&ei=xxD_U-yADoHjaKCSgbAJ&ved=0CC0Q6AEwAjgK#v=onepage&q=salamona%20&f=false	15.5945	39.2049		Shogolev Igor	urn:lsid:catalogueoflife.org:taxon:ee255bb6-18fd-11e5-9774-bc764e0806fb:col20150623	Francolinus leucoscepus	Animalia	Chordata	Aves	Galliformes	Phasianidae	Francolinus	leucoscepus	G. R. Gray, 1867	ICZN	Francolinus leucoscepus GR. Gray, 1867
ZMUA	AVSE	ZMUA_Aves	ZMUA	PreservedSpecimen	1394-989	GR-ZMUA_Aves-1394-989	Schrader G.	1	F	adult	Whole animal (Stuffed)	1900-02-28	1394	Eritrea	GR	Abyssinia (Salamona)	Coordinates according to: http://books.google.gr/books?id=Xl1LrRfh6YYC&pg=PA312&lpg=PA312&dq=salamona+eritrea&source=bl&ots=KtNtDaxzxU&sig=_4aHyygymlNZ7oI1_SW3B2D3CyI&hl=el&sa=X&ei=xxD_U-yADoHjaKCSgbAJ&ved=0CC0Q6AEwAjgK#v=onepage&q=salamona%20&f=false	15.5945	39.2049		Shogolev Igor	urn:lsid:catalogueoflife.org:taxon:ede2020a-18fd-11e5-9774-bc764e0806fb:col20150623	Buccanodon duchaillui	Animalia	Chordata	Aves	Piciformes	Ramphastidae	Buccanodon	duchaillui	(Cassin, 1855)	ICZN	Buccanodon duchaillui
ZMUA	AVSE	ZMUA_Aves	ZMUA	PreservedSpecimen	2555-2150	GR-ZMUA_Aves-2555-2150	Schrader G.	1	M	adult	Whole animal (Stuffed)	1900-03-01	2555	Eritrea	GR	Abyssinia (Salamona)	Coordinates according to: http://books.google.gr/books?id=Xl1LrRfh6YYC&pg=PA312&lpg=PA312&dq=salamona+eritrea&source=bl&ots=KtNtDaxzxU&sig=_4aHyygymlNZ7oI1_SW3B2D3CyI&hl=el&sa=X&ei=xxD_U-yADoHjaKCSgbAJ&ved=0CC0Q6AEwAjgK#v=onepage&q=salamona%20&f=false	15.5945	39.2049		Shogolev Igor	urn:lsid:catalogueoflife.org:taxon:e83406d0-18fd-11e5-9774-bc764e0806fb:col20150807	Turdoides hypoleuca	Animalia	Chordata	Aves	Passeriformes	Leiothrichidae	Turdoides	hypoleuca	(Cabanis, 1878)	ICZN	Turdoides hypoleucus
ZMUA	AVSE	ZMUA_Aves	ZMUA	PreservedSpecimen	1962-1557	GR-ZMUA_Aves-1962-1557	Schrader G.	1	M	adult	Whole animal (Stuffed)	1900-03-01	1962	Eritrea	GR	Abyssinia (Salamona)	Coordinates according to: http://books.google.gr/books?id=Xl1LrRfh6YYC&pg=PA312&lpg=PA312&dq=salamona+eritrea&source=bl&ots=KtNtDaxzxU&sig=_4aHyygymlNZ7oI1_SW3B2D3CyI&hl=el&sa=X&ei=xxD_U-yADoHjaKCSgbAJ&ved=0CC0Q6AEwAjgK#v=onepage&q=salamona%20&f=false	15.5945	39.2049		Shogolev Igor	urn:lsid:catalogueoflife.org:taxon:e7c63001-18fd-11e5-9774-bc764e0806fb:col20150807	Turdus olivaceus	Animalia	Chordata	Aves	Passeriformes	Turdidae	Turdus	olivaceus	Linnaeus, 1766	ICZN	Turdus olivaceus
ZMUA	AVSE	ZMUA_Aves	ZMUA	PreservedSpecimen	825-420	GR-ZMUA_Aves-825-420	Schrader G.	1	M	adult	Whole animal (Stuffed)	1900-03-01	825		GR	Abyssinia	Even though Eritrea belonged to Italy back when Shrader had visited the area, the collector was refering to it as Ethiopia. Therefore it is very probable that the location is in todays Eritrea.	10.6657	39.783	664046	Shogolev Igor	urn:lsid:catalogueoflife.org:taxon:e8677e79-18fd-11e5-9774-bc764e0806fb:col20150807	Scopus umbretta	Animalia	Chordata	Aves	Pelecaniformes	Scopidae	Scopus	umbretta	Gmelin, 1789	ICZN	Scopus umbretta (Gmelin), 1789
ZMUA	AVSE	ZMUA_Aves	ZMUA	PreservedSpecimen	649-244	GR-ZMUA_Aves-649-244	Schrader G.	1	M	adult	Whole animal (Stuffed)	1900-03-03	649		GR	Abyssinia	Even though Eritrea belonged to Italy back when Shrader had visited the area, the collector was refering to it as Ethiopia. Therefore it is very probable that the location is in todays Eritrea.	10.6657	39.783	664046	Shogolev Igor	urn:lsid:catalogueoflife.org:taxon:fbbf2107-18fd-11e5-9774-bc764e0806fb:col20150807	Vanellus tectus	Animalia	Chordata	Aves	Charadriiformes	Charadriidae	Vanellus	tectus	(Boddaert, 1783)	ICZN	Vanellus tectus Boddaert, 1783
ZMUA	AVSE	ZMUA_Aves	ZMUA	PreservedSpecimen	873-468	GR-ZMUA_Aves-873-468	Schrader G.	1	M		Whole animal (Stuffed)	1900-03-29	873	Eritrea	GR	Abyssinia (Ailet)		16.3396	38.8741		Shogolev Igor	urn:lsid:catalogueoflife.org:taxon:eb8ae7b3-18fd-11e5-9774-bc764e0806fb:col20150623	Gyps rueppellii	Animalia	Chordata	Aves	Accipitriformes	Accipitridae	Gyps	rueppellii	(A. E. Brehm, 1852)	ICZN	Gyps rueppellii A. E. Brehm, 1852
ZMUA	AVSE	ZMUA_Aves	ZMUA	PreservedSpecimen	1161-756	GR-ZMUA_Aves-1161-756	Schrader G.	1	M	adult	Whole animal (Stuffed)	1900-03-31	1161	Eritrea	GR	Abyssinia (Ailet)		16.3396	38.8741		Shogolev Igor	urn:lsid:catalogueoflife.org:taxon:eda83124-18fd-11e5-9774-bc764e0806fb:col20150807	Tockus erythrorhynchus	Animalia	Chordata	Aves	Bucerotiformes	Bucerotidae	Tockus	erythrorhynchus	(Temminck, 1823)	ICZN	Tockus erythrorhynchus Temm., 1823
ZMUA	AVSE	ZMUA_Aves	ZMUA	PreservedSpecimen	989-584	GR-ZMUA_Aves-989-584	Schrader G.	1	F	adult	Whole animal (Stuffed)	1900-04-02	989	Eritrea	GR	Abyssinia (Ailet)		16.3396	38.8741		Shogolev Igor	urn:lsid:catalogueoflife.org:taxon:ee2096b3-18fd-11e5-9774-bc764e0806fb:col20150807	Streptopelia capicola	Animalia	Chordata	Aves	Columbiformes	Columbidae	Streptopelia	capicola	(Sundevall, 1857)	ICZN	Streptopelia capicola
ZMUA	AVSE	ZMUA_Aves	ZMUA	PreservedSpecimen	1159-754	GR-ZMUA_Aves-1159-754	Schrader G.	1	F	adult	Whole animal (Stuffed)	1900-04-12	1159	Eritrea	GR	Abyssinia (Ailet)		16.3396	38.8741		Shogolev Igor	urn:lsid:catalogueoflife.org:taxon:fbc01a1d-18fd-11e5-9774-bc764e0806fb:col20150807	Tockus nasutus	Animalia	Chordata	Aves	Bucerotiformes	Bucerotidae	Tockus	nasutus	(Linnaeus, 1766)	ICZN	Tockus nasutus L., 1766
ZMUA	AVSE	ZMUA_Aves	ZMUA	PreservedSpecimen	1185-780	GR-ZMUA_Aves-1185-780	Schrader G.	1	M	adult	Whole animal (Stuffed)	1900-04-13	1185	Eritrea	GR	Abyssinia (Ailet)		16.3396	38.8741		Shogolev Igor	urn:lsid:catalogueoflife.org:taxon:2475c526-18fe-11e5-9774-bc764e0806fb:col20150807	Tockus nasutus nasutus	Animalia	Chordata	Aves	Bucerotiformes	Bucerotidae	Tockus	nasutus	(Linnaeus, 1766)	ICZN	Tockus nasutus nasutus L., 1766
ZMUA	AVSE	ZMUA_Aves	ZMUA	PreservedSpecimen	828-423	GR-ZMUA_Aves-828-423	Schrader G.	1	M	adult	Whole animal (Stuffed)	1900-04-16	828	Eritrea	GR	Abyssinia (Ailet)		16.3396	38.8741		Shogolev Igor	urn:lsid:catalogueoflife.org:taxon:e8677bb4-18fd-11e5-9774-bc764e0806fb:col20150623	Ciconia abdimii	Animalia	Chordata	Aves	Ciconiiformes	Ciconiidae	Ciconia	abdimii	Lichtenstein, 1823	ICZN	Ciconia abdimii Lichtenstein, 1823
ZMUA	AVSE	ZMUA_Aves	ZMUA	PreservedSpecimen	1782-1377	GR-ZMUA_Aves-1782-1377	Schrader G.	1	M	adult	Whole animal (Stuffed)	1900-04-17	1782		GR	Abyssinia	Even though Eritrea belonged to Italy back when Shrader had visited the area, the collector was refering to it as Ethiopia. Therefore it is very probable that the location is in todays Eritrea.	10.6657	39.783	664046	Shogolev Igor	urn:lsid:catalogueoflife.org:taxon:e7b638c0-18fd-11e5-9774-bc764e0806fb:col20150623	Eremopterix leucotis	Animalia	Chordata	Aves	Passeriformes	Alaudidae	Eremopterix	leucotis	(Stanley, 1814)	ICZN	Eremopterix leucotis
ZMUA	AVSE	ZMUA_Aves	ZMUA	PreservedSpecimen	1635-1230	GR-ZMUA_Aves-1635-1230	Schrader G.	1	M	adult	Whole animal (Stuffed)	1900-04-21	1635		GR	Abyssinia	Even though Eritrea belonged to Italy back when Shrader had visited the area, the collector was refering to it as Ethiopia. Therefore it is very probable that the location is in todays Eritrea.	10.6657	39.783	664046	Shogolev Igor	urn:lsid:catalogueoflife.org:taxon:031249c7-18fe-11e5-9774-bc764e0806fb:col20150623	Coracias naevius	Animalia	Chordata	Aves	Coraciiformes	Coraciidae	Coracias	naevius	Daudin, 1800	ICZN	Coracias naevius Daudin, 1800
ZMUA	AVSE	ZMUA_Aves	ZMUA	PreservedSpecimen	1351-946	GR-ZMUA_Aves-1351-946	Schrader G.	1			Whole animal (Stuffed)	1900-04-22	1351	Eritrea	GR	Abyssinia (Ailet)		16.3396	38.8741		Shogolev Igor	urn:lsid:catalogueoflife.org:taxon:e7e39173-18fd-11e5-9774-bc764e0806fb:col20150807	Nilaus afer	Animalia	Chordata	Aves	Passeriformes	Malaconotidae	Nilaus	afer	(Latham, 1802)	ICZN	Nilaus afer
ZMUA	AVSE	ZMUA_Aves	ZMUA	PreservedSpecimen	2765-2360	GR-ZMUA_Aves-2765-2360		1			Whole animal (Stuffed)	1900-04-25	2765	Greece	GR	Naxos	Coordinates according to: http://bl.ocks.org/rdmpage/raw/9951904/	37.0661	25.4917	17622	Shogolev Igor	urn:lsid:catalogueoflife.org:taxon:fb5dba31-18fd-11e5-9774-bc764e0806fb:col20150807	Philomachus pugnax	Animalia	Chordata	Aves	Charadriiformes	Scolopacidae	Philomachus	pugnax	(Linnaeus, 1758)	ICZN	Philomachus pugnax (L.), 1758
ZMUA	AVSE	ZMUA_Aves	ZMUA	PreservedSpecimen	1350-945	GR-ZMUA_Aves-1350-945	Schrader G.	1			Whole animal (Stuffed)	1900-04-27	1350	Eritrea	GR	Abyssinia (Ailet)		16.3396	38.8741		Shogolev Igor	urn:lsid:catalogueoflife.org:taxon:e8233d10-18fd-11e5-9774-bc764e0806fb:col20150623	Lanius isabellinus	Animalia	Chordata	Aves	Passeriformes	Laniidae	Lanius	isabellinus	Hemprich & Ehrenberg, 1833	ICZN	Lanius isabellinus
ZMUA	AVSE	ZMUA_Aves	ZMUA	PreservedSpecimen	1613-1208	GR-ZMUA_Aves-1613-1208	Schrader G.	1	M		Whole animal (Stuffed)	1900-04-30	1613	Eritrea	GR	Abyssinia (Ailet)		16.3396	38.8741		Shogolev Igor	urn:lsid:catalogueoflife.org:taxon:2305561d-18fe-11e5-9774-bc764e0806fb:col20150807	Phoeniculus somaliensis abyssinicus	Animalia	Chordata	Aves	Bucerotiformes	Phoeniculidae	Phoeniculus	somaliensis	(Neumann, 1903)	ICZN	Phoeniculus somaliensis abyssinicus (Neumann 1903)
ZMUA	AVSE	ZMUA_Aves	ZMUA	PreservedSpecimen	3172-2766	GR-ZMUA_Aves-3172-2766	Schrader G.	1			Whole animal (Stuffed)	1900-08-31	3172	Eritrea	GR	Abyssinia (Ailet)		16.3396	38.8741		Papastefanou Gabriella	urn:lsid:catalogueoflife.org:taxon:e8359676-18fd-11e5-9774-bc764e0806fb:col20150623	Hedydipna platura	Animalia	Chordata	Aves	Passeriformes	Nectariniidae	Hedydipna	platura	(Vieillot, 1819)	ICZN	Anthreptes platura
ZMUA	AVSE	ZMUA_Aves	ZMUA	PreservedSpecimen	2368-1963	GR-ZMUA_Aves-2368-1963	Schrader G.	1			Whole animal (Stuffed)	1900-09-05	2368	Eritrea	GR	Abyssinia (Ailet)		16.3396	38.8741		Shogolev Igor	urn:lsid:catalogueoflife.org:taxon:e81c676d-18fd-11e5-9774-bc764e0806fb:col20150623	Cercotrichas podobe	Animalia	Chordata	Aves	Passeriformes	Muscicapidae	Cercotrichas	podobe	(Statius Muller, 1776)	ICZN	Cercotrichas podobe
ZMUA	AVSE	ZMUA_Aves	ZMUA	PreservedSpecimen	2452-2047	GR-ZMUA_Aves-2452-2047	Schrader G.	1			Whole animal (Stuffed)	1900-09-16	2452		GR	Abyssinia	Even though Eritrea belonged to Italy back when Shrader had visited the area, the collector was refering to it as Ethiopia. Therefore it is very probable that the location is in todays Eritrea.	10.6657	39.783	664046	Shogolev Igor	urn:lsid:catalogueoflife.org:taxon:e7cd02c5-18fd-11e5-9774-bc764e0806fb:col20150807	Ploceus galbula	Animalia	Chordata	Aves	Passeriformes	Ploceidae	Ploceus	galbula	Rüppell, 1840	ICZN	Ploceus galbula
ZMUA	AVSE	ZMUA_Aves	ZMUA	PreservedSpecimen	1304-899	GR-ZMUA_Aves-1304-899	King George A'	1			Whole animal (Stuffed)	1901-01-07	1304	Denmark	GR	Greenland (Napassut)	Coordinates according to: Google maps	61.0267	-48.0295	44092	Shogolev Igor	urn:lsid:catalogueoflife.org:taxon:fb5f813e-18fd-11e5-9774-bc764e0806fb:col20150623	Cepphus grylle	Animalia	Chordata	Aves	Charadriiformes	Alcidae	Cepphus	grylle	(Linnaeus, 1758)	ICZN	Cepphus grylle (L.)
ZMUA	AVSE	ZMUA_Aves	ZMUA	Occurrence	B53-2885	GR-ZMUA_Aves-B53-2885		1	F	adult	Specimen unavailable	1901-03-15	B53	Denmark	GR	Greenland	Coordinates according to: http://bl.ocks.org/rdmpage/raw/9951904/	71.9737	-42.201	1354475			Falco sp.	Animalia	Chordata	Aves	Falconiformes	Falconidae	Falco			ICZN	Falco gyrfalco candicans
ZMUA	AVSE	ZMUA_Aves	ZMUA	PreservedSpecimen	1066-661	GR-ZMUA_Aves-1066-661	King George A'	1	F	adult	Whole animal (Stuffed)	1901-09-10	1066	Denmark	GR	Greenland	Coordinates according to: http://bl.ocks.org/rdmpage/raw/9951904/	71.9737	-42.201	1354475	Shogolev Igor	urn:lsid:catalogueoflife.org:taxon:e91d7c02-18fd-11e5-9774-bc764e0806fb:col20150623	Falco rusticolus	Animalia	Chordata	Aves	Falconiformes	Falconidae	Falco	rusticolus	Linnaeus, 1758	ICZN	Falco rusticolus L.
ZMUA	AVSE	ZMUA_Aves	ZMUA	PreservedSpecimen	428-23	GR-ZMUA_Aves-428-23	King George A'	1	M	juvenile	Whole animal (Stuffed)	1900-10-06	428	Denmark	GR	Greenland	Coordinates according to: http://bl.ocks.org/rdmpage/raw/9951904/	71.9737	-42.201	1354475	Shogolev Igor	urn:lsid:catalogueoflife.org:taxon:ee1d2d13-18fd-11e5-9774-bc764e0806fb:col20150807	Pagophila eburnea	Animalia	Chordata	Aves	Charadriiformes	Laridae	Pagophila	eburnea	(Phipps, 1774)	ICZN	Pagophila eburnea Phipps 1774
ZMUA	AVSE	ZMUA_Aves	ZMUA	PreservedSpecimen	1063-658	GR-ZMUA_Aves-1063-658	King George A'	1	F	adult	Whole animal (Stuffed)	1900-10-23	1063	Denmark	GR	Greenland	Coordinates according to: http://bl.ocks.org/rdmpage/raw/9951904/	71.9737	-42.201	1354475	Shogolev Igor	urn:lsid:catalogueoflife.org:taxon:e91d7c02-18fd-11e5-9774-bc764e0806fb:col20150623	Falco rusticolus	Animalia	Chordata	Aves	Falconiformes	Falconidae	Falco	rusticolus	Linnaeus, 1758	ICZN	Falco rusticolus L.
ZMUA	AVSE	ZMUA_Aves	ZMUA	PreservedSpecimen	2860-2455	GR-ZMUA_Aves-2860-2455	Strimeneas	1	F	adult	Whole animal (Stuffed)	1901-11-12	2860	Greece	GR	Mount Othrys	Coordinates according to: http://bl.ocks.org/rdmpage/raw/9951904/	39.015	22.7139	4536	Shogolev Igor	urn:lsid:catalogueoflife.org:taxon:e6f30236-18fd-11e5-9774-bc764e0806fb:col20150623	Aegithalos caudatus	Animalia	Chordata	Aves	Passeriformes	Aegithalidae	Aegithalos	caudatus	(Linnaeus, 1758)	ICZN	Aegithalos caudatus (L.)
ZMUA	AVSE	ZMUA_Aves	ZMUA	PreservedSpecimen	3020-2614	GR-ZMUA_Aves-3020-2614	King George A'	1	F	adult	Whole animal (Stuffed)	1901-11-15	3020	Denmark	GR	Greenland (Sukkertoppen)	Coordinates according to: http://www.davidrumsey.com/luna/servlet/detail/RUMSEY~8~1~33206~1170575:Gletscherkarte-?showTip=false&showTipAdvancedSearch=false&title=Search+Results%3A+List_No+equal+to+%271578.006%27&thumbnailViewUrlKey=link.view.search.url&helpUrl=http%3A%2F%2Fdoc.lunaimaging.com%2Fdisplay%2FV71D%2FLUNA%2BViewer%23LUNAViewer-LUNAViewer&fullTextSearchChecked=&advancedSearchUrl=http%3A…	65.4128	-52.8745	27809	Shogolev Igor	urn:lsid:catalogueoflife.org:taxon:fb5f6b71-18fd-11e5-9774-bc764e0806fb:col20150623	Fratercula arctica	Animalia	Chordata	Aves	Charadriiformes	Alcidae	Fratercula	arctica	(Linnaeus, 1758)	ICZN	Fratercula arctica L. 1758
ZMUA	AVSE	ZMUA_Aves	ZMUA	PreservedSpecimen	1068-663	GR-ZMUA_Aves-1068-663	King George A'	1	F	adult	Whole animal (Stuffed)	1901-12-01	1068	Denmark	GR	Greenland	Coordinates according to: http://bl.ocks.org/rdmpage/raw/9951904/	71.9737	-42.201	1354475	Shogolev Igor	urn:lsid:catalogueoflife.org:taxon:e91d7c02-18fd-11e5-9774-bc764e0806fb:col20150623	Falco rusticolus	Animalia	Chordata	Aves	Falconiformes	Falconidae	Falco	rusticolus	Linnaeus, 1758	ICZN	Falco rusticolus L.
ZMUA	AVSE	ZMUA_Aves	ZMUA	PreservedSpecimen	1542-1137	GR-ZMUA_Aves-1542-1137	Schrader G.	1	F	adult	Whole animal (Stuffed)	1902-02-12	1542		GR	Abyssinia	Even though Eritrea belonged to Italy back when Shrader had visited the area, the collector was refering to it as Ethiopia. Therefore it is very probable that the location is in todays Eritrea.	10.6657	39.783	664046	Shogolev Igor	urn:lsid:catalogueoflife.org:taxon:eded8bdd-18fd-11e5-9774-bc764e0806fb:col20150807	Trachyphonus darnaudii	Animalia	Chordata	Aves	Piciformes	Ramphastidae	Trachyphonus	darnaudii	(Prevost & Des Murs, 1847)	ICZN	Tachyphonus damaudii
ZMUA	AVSE	ZMUA_Aves	ZMUA	PreservedSpecimen	1010-605	GR-ZMUA_Aves-1010-605	King George A'	1	F	adult	Whole animal (Stuffed)	1902-03-24	1010	Denmark	GR	Greenland (Sukkertoppen)	Coordinates according to: http://www.davidrumsey.com/luna/servlet/detail/RUMSEY~8~1~33206~1170575:Gletscherkarte-?showTip=false&showTipAdvancedSearch=false&title=Search+Results%3A+List_No+equal+to+%271578.006%27&thumbnailViewUrlKey=link.view.search.url&helpUrl=http%3A%2F%2Fdoc.lunaimaging.com%2Fdisplay%2FV71D%2FLUNA%2BViewer%23LUNAViewer-LUNAViewer&fullTextSearchChecked=&advancedSearchUrl=http%3A…	65.4128	-52.8745	27809	Shogolev Igor	urn:lsid:catalogueoflife.org:taxon:fd9d4399-18fd-11e5-9774-bc764e0806fb:col20150623	Bubo scandiacus	Animalia	Chordata	Aves	Strigiformes	Strigidae	Bubo	scandiacus	(Linnaeus, 1758)	ICZN	Nyctea scandiaca L.
ZMUA	AVSE	ZMUA_Aves	ZMUA	PreservedSpecimen	480-75	GR-ZMUA_Aves-480-75	King George A'	1	M	adult	Whole animal (Stuffed)	1902-04-10	480	Denmark	GR	Greenland	Coordinates according to: http://bl.ocks.org/rdmpage/raw/9951904/	71.9737	-42.201	1354475	Shogolev Igor	urn:lsid:catalogueoflife.org:taxon:ee1d45cc-18fd-11e5-9774-bc764e0806fb:col20150623	Larus glaucoides	Animalia	Chordata	Aves	Charadriiformes	Laridae	Larus	glaucoides	B. Meyer, 1822	ICZN	Larus glaucoides B. Meyer, 1822
ZMUA	AVSE	ZMUA_Aves	ZMUA	PreservedSpecimen	2155-1750	GR-ZMUA_Aves-2155-1750	Strimeneas	1	M	adult	Whole animal (Stuffed)	1902-04-29	2155	Greece	GR	Lamia	Coordinates according to: http://bl.ocks.org/rdmpage/raw/9951904/	38.8966	22.4392	1371	Shogolev Igor	urn:lsid:catalogueoflife.org:taxon:e8330099-18fd-11e5-9774-bc764e0806fb:col20150807	Pastor roseus	Animalia	Chordata	Aves	Passeriformes	Sturnidae	Pastor	roseus	(Linnaeus, 1758)	ICZN	Sturnus roseus
ZMUA	AVSE	ZMUA_Aves	ZMUA	PreservedSpecimen	758-353	GR-ZMUA_Aves-758-353	Schlüter W.	1	M	adult	Whole animal (Stuffed)	1902-06-01	758		GR	Lapland	Coordinates according to: http://www.getty.edu/vow/TGNFullDisplay?find=lapland&place=&nation=&prev_page=1&english=Y&subjectid=7010028	68.2383	25.2876	390067	Shogolev Igor	urn:lsid:catalogueoflife.org:taxon:e8672b42-18fd-11e5-9774-bc764e0806fb:col20150623	Anser erythropus	Animalia	Chordata	Aves	Anseriformes	Anatidae	Anser	erythropus	(Linnaeus, 1758)	ICZN	Anser erythropus (L.)
ZMUA	AVSE	ZMUA_Aves	ZMUA	PreservedSpecimen	654-249	GR-ZMUA_Aves-654-249	King George A'	1	M	adult	Whole animal (Stuffed)	1902-06-28	654	Denmark	GR	Greenland	Coordinates according to: http://bl.ocks.org/rdmpage/raw/9951904/	71.9737	-42.201	1354475	Shogolev Igor	urn:lsid:catalogueoflife.org:taxon:e8594ab0-18fd-11e5-9774-bc764e0806fb:col20150623	Gavia immer	Animalia	Chordata	Aves	Gaviiformes	Gaviidae	Gavia	immer	(Brunnich, 1764)	ICZN	Gavia immer
ZMUA	AVSE	ZMUA_Aves	ZMUA	PreservedSpecimen	1075-670	GR-ZMUA_Aves-1075-670	King George A'	1	M	adult	Whole animal (Stuffed)	1902-10-21	1075	Denmark	GR	Greenland	Coordinates according to: http://bl.ocks.org/rdmpage/raw/9951904/	71.9737	-42.201	1354475	Shogolev Igor	urn:lsid:catalogueoflife.org:taxon:e91d7c02-18fd-11e5-9774-bc764e0806fb:col20150623	Falco rusticolus	Animalia	Chordata	Aves	Falconiformes	Falconidae	Falco	rusticolus	Linnaeus, 1758	ICZN	Falco rusticola L., 1758
ZMUA	AVSE	ZMUA_Aves	ZMUA	PreservedSpecimen	1095-690	GR-ZMUA_Aves-1095-690		1			Whole animal (Stuffed)	1902-11-10	1095		GR						Shogolev Igor	urn:lsid:catalogueoflife.org:taxon:e91d7c02-18fd-11e5-9774-bc764e0806fb:col20150623	Falco rusticolus	Animalia	Chordata	Aves	Falconiformes	Falconidae	Falco	rusticolus	Linnaeus, 1758	ICZN	Falco rusticolus L.
ZMUA	AVSE	ZMUA_Aves	ZMUA	PreservedSpecimen	2720-2315	GR-ZMUA_Aves-2720-2315	King George A'	1	M	adult	Whole animal (Stuffed)	1902-12-06	2720	Denmark	GR	Greenland	Coordinates according to: http://bl.ocks.org/rdmpage/raw/9951904/	71.9737	-42.201	1354475	Shogolev Igor	urn:lsid:catalogueoflife.org:taxon:e8670d4c-18fd-11e5-9774-bc764e0806fb:col20150623	Anas platyrhynchos	Animalia	Chordata	Aves	Anseriformes	Anatidae	Anas	platyrhynchos	Linnaeus, 1758	ICZN	Anas platyrhynchos L.
ZMUA	AVSE	ZMUA_Aves	ZMUA	PreservedSpecimen	559-154	GR-ZMUA_Aves-559-154	Strimeneas	1	M	adult	Whole animal (Stuffed)	1902-12-14	559	Greece	GR	Lamia (Megali Vrisi)	Coordinates according to: http://bl.ocks.org/rdmpage/raw/9951904/	38.8942	22.4751	426	Shogolev Igor	urn:lsid:catalogueoflife.org:taxon:e867095c-18fd-11e5-9774-bc764e0806fb:col20150623	Anas acuta	Animalia	Chordata	Aves	Anseriformes	Anatidae	Anas	acuta	Linnaeus, 1758	ICZN	Anas acuta L. 1758
ZMUA	AVSE	ZMUA_Aves	ZMUA	PreservedSpecimen	1111-706	GR-ZMUA_Aves-1111-706	King George A'	1	F	adult	Whole animal (Stuffed)	1902-12-15	1111	Denmark	GR	Greenland	Coordinates according to: http://bl.ocks.org/rdmpage/raw/9951904/	71.9737	-42.201	1354475	Shogolev Igor	urn:lsid:catalogueoflife.org:taxon:e7b88fa6-18fd-11e5-9774-bc764e0806fb:col20150623	Corvus corax	Animalia	Chordata	Aves	Passeriformes	Corvidae	Corvus	corax	Linnaeus, 1758	ICZN	Corvus corax
ZMUA	AVSE	ZMUA_Aves	ZMUA	PreservedSpecimen	609-204	GR-ZMUA_Aves-609-204	Rosenberg-Schrader G.	1	F	adult	Whole animal (Stuffed)	1902-12-16	609	Eritrea	GR	Abyssinia (Senafe)	Coordinates according to: http://bl.ocks.org/rdmpage/raw/9951904/	14.7019	39.4237	1753	Shogolev Igor	urn:lsid:catalogueoflife.org:taxon:e8675266-18fd-11e5-9774-bc764e0806fb:col20150623	Bostrychia carunculata	Animalia	Chordata	Aves	Pelecaniformes	Threskiornithidae	Bostrychia	carunculata	(Rüppell, 1837)	ICZN	Bostrychia carunculata Ruppell, 1937
ZMUA	AVSE	ZMUA_Aves	ZMUA	PreservedSpecimen	1212-807	GR-ZMUA_Aves-1212-807	Rosenberg-Schrader G.	1	F	adult	Whole animal (Stuffed)	1902-12-16	1212		GR	Abyssinia	Even though Eritrea belonged to Italy back when Shrader had visited the area, the collector was refering to it as Ethiopia. Therefore it is very probable that the location is in todays Eritrea.	10.6657	39.783	664046	Shogolev Igor	urn:lsid:catalogueoflife.org:taxon:e8230eb1-18fd-11e5-9774-bc764e0806fb:col20150623	Laniarius aethiopicus	Animalia	Chordata	Aves	Passeriformes	Malaconotidae	Laniarius	aethiopicus	(Gmelin, 1789)	ICZN	Laniarius aethiopicus
ZMUA	AVSE	ZMUA_Aves	ZMUA	PreservedSpecimen	488-83	GR-ZMUA_Aves-488-83	Strimeneas	1	M	adult	Whole animal (Stuffed)	1902-12-21	488	Greece	GR	Lamia	Coordinates according to: http://bl.ocks.org/rdmpage/raw/9951904/	38.8966	22.4392	1371	Shogolev Igor	urn:lsid:catalogueoflife.org:taxon:e7b56e80-18fd-11e5-9774-bc764e0806fb:col20150807	Turdus pilaris	Animalia	Chordata	Aves	Passeriformes	Turdidae	Turdus	pilaris	Linnaeus, 1758	ICZN	Turdus pilaris L.
ZMUA	AVSE	ZMUA_Aves	ZMUA	PreservedSpecimen	2056-1651	GR-ZMUA_Aves-2056-1651	Rosenberg-Schrader G.	1	M	adult	Whole animal (Stuffed)	1902-12-25	2056	Eritrea	GR	Abyssinia (Senafe)	Coordinates according to: http://bl.ocks.org/rdmpage/raw/9951904/	14.7019	39.4237	1753	Shogolev Igor	urn:lsid:catalogueoflife.org:taxon:e7c4d34f-18fd-11e5-9774-bc764e0806fb:col20150807	Onychognathus albirostris	Animalia	Chordata	Aves	Passeriformes	Sturnidae	Onychognathus	albirostris	(Rüppell, 1836)	ICZN	Onychognathus albirostris
ZMUA	AVSE	ZMUA_Aves	ZMUA	PreservedSpecimen	1208-803	GR-ZMUA_Aves-1208-803	Schrader G.	1	M	adult	Whole animal (Stuffed)	1902-12-28	1208		GR	Abyssinia	Even though Eritrea belonged to Italy back when Shrader had visited the area, the collector was refering to it as Ethiopia. Therefore it is very probable that the location is in todays Eritrea.	10.6657	39.783	664046	Shogolev Igor	urn:lsid:catalogueoflife.org:taxon:eded9933-18fd-11e5-9774-bc764e0806fb:col20150623	Lybius guifsobalito	Animalia	Chordata	Aves	Piciformes	Ramphastidae	Lybius	guifsobalito	Hermann, 1783	ICZN	Lybius guifsobalito
ZMUA	AVSE	ZMUA_Aves	ZMUA	PreservedSpecimen	944-539	GR-ZMUA_Aves-944-539	Rosenberg-Schrader G.	1	M	adult	Whole animal (Stuffed)	1902-12-30	944		GR	Abyssinia	Even though Eritrea belonged to Italy back when Shrader had visited the area, the collector was refering to it as Ethiopia. Therefore it is very probable that the location is in todays Eritrea.	10.6657	39.783	664046	Shogolev Igor	urn:lsid:catalogueoflife.org:taxon:ed13bc73-18fd-11e5-9774-bc764e0806fb:col20150623	Columba guinea	Animalia	Chordata	Aves	Columbiformes	Columbidae	Columba	guinea	Linnaeus, 1758	ICZN	Columba guinea L. 1758
ZMUA	AVSE	ZMUA_Aves	ZMUA	PreservedSpecimen	1110-705	GR-ZMUA_Aves-1110-705	Strimeneas	1	M	adult	Whole animal (Stuffed)	1902-12-30	1110	Greece	GR	Lamia	Coordinates according to: http://bl.ocks.org/rdmpage/raw/9951904/	38.8966	22.4392	1371	Shogolev Igor	urn:lsid:catalogueoflife.org:taxon:ee210d25-18fd-11e5-9774-bc764e0806fb:col20150730	Merops apiaster	Animalia	Chordata	Aves	Coraciiformes	Meropidae	Merops	apiaster	Linnaeus, 1758	ICZN	Merops apiaster
ZMUA	AVSE	ZMUA_Aves	ZMUA	PreservedSpecimen	2714-2309	GR-ZMUA_Aves-2714-2309	King George A'	1	M	adult	Whole animal (Stuffed)	1903-01-05	2714	Denmark	GR	Greenland (Sukkertoppen)	Coordinates according to: http://www.davidrumsey.com/luna/servlet/detail/RUMSEY~8~1~33206~1170575:Gletscherkarte-?showTip=false&showTipAdvancedSearch=false&title=Search+Results%3A+List_No+equal+to+%271578.006%27&thumbnailViewUrlKey=link.view.search.url&helpUrl=http%3A%2F%2Fdoc.lunaimaging.com%2Fdisplay%2FV71D%2FLUNA%2BViewer%23LUNAViewer-LUNAViewer&fullTextSearchChecked=&advancedSearchUrl=http%3A…	65.4128	-52.8745	27809	Shogolev Igor	urn:lsid:catalogueoflife.org:taxon:fb5f813e-18fd-11e5-9774-bc764e0806fb:col20150623	Cepphus grylle	Animalia	Chordata	Aves	Charadriiformes	Alcidae	Cepphus	grylle	(Linnaeus, 1758)	ICZN	Cepphus grylle (L.)
ZMUA	AVSE	ZMUA_Aves	ZMUA	PreservedSpecimen	2902-2497	GR-ZMUA_Aves-2902-2497	King George A'	1		juvenile	Whole animal (Stuffed)	1903-01-05	2902	Denmark	GR	Greenland (Sukkertoppen)	Coordinates according to: http://www.davidrumsey.com/luna/servlet/detail/RUMSEY~8~1~33206~1170575:Gletscherkarte-?showTip=false&showTipAdvancedSearch=false&title=Search+Results%3A+List_No+equal+to+%271578.006%27&thumbnailViewUrlKey=link.view.search.url&helpUrl=http%3A%2F%2Fdoc.lunaimaging.com%2Fdisplay%2FV71D%2FLUNA%2BViewer%23LUNAViewer-LUNAViewer&fullTextSearchChecked=&advancedSearchUrl=http%3A…	65.4128	-52.8745	27809	Shogolev Igor	urn:lsid:catalogueoflife.org:taxon:fb5f813e-18fd-11e5-9774-bc764e0806fb:col20150623	Cepphus grylle	Animalia	Chordata	Aves	Charadriiformes	Alcidae	Cepphus	grylle	(Linnaeus, 1758)	ICZN	Cepphus grylle (L.)
ZMUA	AVSE	ZMUA_Aves	ZMUA	PreservedSpecimen	941-536	GR-ZMUA_Aves-941-536	Schrader G.	1	M	adult	Whole animal (Stuffed)	1903-01-05	941		GR	Abyssinia	Even though Eritrea belonged to Italy back when Shrader had visited the area, the collector was refering to it as Ethiopia. Therefore it is very probable that the location is in todays Eritrea.	10.6657	39.783	664046	Shogolev Igor	urn:lsid:catalogueoflife.org:taxon:ed13c35a-18fd-11e5-9774-bc764e0806fb:col20150623	Columba albitorques	Animalia	Chordata	Aves	Columbiformes	Columbidae	Columba	albitorques	Rüppell, 1837	ICZN	Columba albitorques Ruppell, 1837
ZMUA	AVSE	ZMUA_Aves	ZMUA	PreservedSpecimen	712-307	GR-ZMUA_Aves-712-307	Strimeneas	1	M	adult	Whole animal (Stuffed)	1903-01-11	712	Greece	GR	Lamia (Megali Vrisi)	Coordinates according to: http://bl.ocks.org/rdmpage/raw/9951904/	38.8942	22.4751	426	Shogolev Igor	urn:lsid:catalogueoflife.org:taxon:e866fe84-18fd-11e5-9774-bc764e0806fb:col20150623	Anas penelope	Animalia	Chordata	Aves	Anseriformes	Anatidae	Anas	penelope	Linnaeus, 1758	ICZN	Anas penelope L.
ZMUA	AVSE	ZMUA_Aves	ZMUA	PreservedSpecimen	972-567	GR-ZMUA_Aves-972-567	Rosenberg-Schrader G.	1	M	adult	Whole animal (Stuffed)	1903-01-17	972	Eritrea	GR	Abyssinia (Senafe)	Coordinates according to: http://bl.ocks.org/rdmpage/raw/9951904/	14.7019	39.4237	1753	Shogolev Igor	urn:lsid:catalogueoflife.org:taxon:e6ef8d14-18fd-11e5-9774-bc764e0806fb:col20150623	Cossypha semirufa	Animalia	Chordata	Aves	Passeriformes	Muscicapidae	Cossypha	semirufa	(Rüppell, 1837)	ICZN	Cossypha semirufa
ZMUA	AVSE	ZMUA_Aves	ZMUA	PreservedSpecimen	1324-919	GR-ZMUA_Aves-1324-919	Rosenberg-Schrader G.	1	M	adult	Whole animal (Stuffed)	1903-01-30	1324	Eritrea	GR	Abyssinia (Chadi Saati)	Coordinates for Saati in Eritrea, according to http://bl.ocks.org/rdmpage/raw/9951904/	15.6001	39.2501	268	Shogolev Igor	urn:lsid:catalogueoflife.org:taxon:f6bd78d7-18fd-11e5-9774-bc764e0806fb:col20150623	Crinifer zonurus	Animalia	Chordata	Aves	Musophagiformes	Musophagidae	Crinifer	zonurus	(Rüppell, 1835)	ICZN	Crinifer zonurus Ruppell 1835
ZMUA	AVSE	ZMUA_Aves	ZMUA	PreservedSpecimen	1864-1459	GR-ZMUA_Aves-1864-1459	Rosenberg-Schrader G.	1	M	adult	Whole animal (Stuffed)	1903-02-04	1864	Eritrea	GR	Abyssinia (Chadi Saati)	Coordinates for Saati in Eritrea, according to http://bl.ocks.org/rdmpage/raw/9951904/	15.6001	39.2501	268	Shogolev Igor	urn:lsid:catalogueoflife.org:taxon:e6256795-18fd-11e5-9774-bc764e0806fb:col20150623	Buphagus africanus	Animalia	Chordata	Aves	Passeriformes	Buphagidae	Buphagus	africanus	Linnaeus, 1766	ICZN	Buphagus africanus
ZMUA	AVSE	ZMUA_Aves	ZMUA	PreservedSpecimen	1569-1164	GR-ZMUA_Aves-1569-1164	Merlin S.	1	M	adult	Whole animal (Stuffed)	1903-02-05	1569	Greece	GR	Attica	Coordinates according to: http://bl.ocks.org/rdmpage/raw/9951904/	37.9789	23.6696	50004	Shogolev Igor	urn:lsid:catalogueoflife.org:taxon:e6f13604-18fd-11e5-9774-bc764e0806fb:col20150623	Lanius senator	Animalia	Chordata	Aves	Passeriformes	Laniidae	Lanius	senator	Linnaeus, 1758	ICZN	Lanius senator L.
ZMUA	AVSE	ZMUA_Aves	ZMUA	PreservedSpecimen	2462-2057	GR-ZMUA_Aves-2462-2057	Rosenberg-Schrader G.	1	M	adult	Whole animal (Stuffed)	1903-02-14	2462	Eritrea	GR	Abyssinia (Chadi Saati)	Coordinates for Saati in Eritrea, according to http://bl.ocks.org/rdmpage/raw/9951904/	15.6001	39.2501	268	Shogolev Igor	urn:lsid:catalogueoflife.org:taxon:e7cadbc0-18fd-11e5-9774-bc764e0806fb:col20150807	Parus carpi	Animalia	Chordata	Aves	Passeriformes	Paridae	Parus	carpi	Macdonald & B. P. Hall, 1957	ICZN	Parus carpi
ZMUA	AVSE	ZMUA_Aves	ZMUA	PreservedSpecimen	1452-1047	GR-ZMUA_Aves-1452-1047	Rosenberg-Schrader G.	1	F	adult	Whole animal (Stuffed)	1903-02-16	1452	Eritrea	GR	Abyssinia (Chadi Saati)	Coordinates for Saati in Eritrea, according to http://bl.ocks.org/rdmpage/raw/9951904/	15.6001	39.2501	268	Shogolev Igor	urn:lsid:catalogueoflife.org:taxon:e7c8414c-18fd-11e5-9774-bc764e0806fb:col20150807	Terpsiphone viridis	Animalia	Chordata	Aves	Passeriformes	Monarchidae	Terpsiphone	viridis	(Statius Muller, 1776)	ICZN	Terpsiphone viridis
ZMUA	AVSE	ZMUA_Aves	ZMUA	PreservedSpecimen	2726-2321	GR-ZMUA_Aves-2726-2321	King George A'	1	F	adult	Whole animal (Stuffed)	1903-03-02	2726	Denmark	GR	Greenland (Sukkertoppen)	Coordinates according to: http://www.davidrumsey.com/luna/servlet/detail/RUMSEY~8~1~33206~1170575:Gletscherkarte-?showTip=false&showTipAdvancedSearch=false&title=Search+Results%3A+List_No+equal+to+%271578.006%27&thumbnailViewUrlKey=link.view.search.url&helpUrl=http%3A%2F%2Fdoc.lunaimaging.com%2Fdisplay%2FV71D%2FLUNA%2BViewer%23LUNAViewer-LUNAViewer&fullTextSearchChecked=&advancedSearchUrl=http%3A…	65.4128	-52.8745	27809	Shogolev Igor	urn:lsid:catalogueoflife.org:taxon:e8668c6e-18fd-11e5-9774-bc764e0806fb:col20150807	Somateria mollissima	Animalia	Chordata	Aves	Anseriformes	Anatidae	Somateria	mollissima	(Linnaeus, 1758)	ICZN	Somateria mollissima L.
ZMUA	AVSE	ZMUA_Aves	ZMUA	PreservedSpecimen	2754-2349	GR-ZMUA_Aves-2754-2349	King George A'	1	M	adult	Whole animal (Stuffed)	1903-03-05	2754	Denmark	GR	Greenland (Sukkertoppen)	Coordinates according to: http://www.davidrumsey.com/luna/servlet/detail/RUMSEY~8~1~33206~1170575:Gletscherkarte-?showTip=false&showTipAdvancedSearch=false&title=Search+Results%3A+List_No+equal+to+%271578.006%27&thumbnailViewUrlKey=link.view.search.url&helpUrl=http%3A%2F%2Fdoc.lunaimaging.com%2Fdisplay%2FV71D%2FLUNA%2BViewer%23LUNAViewer-LUNAViewer&fullTextSearchChecked=&advancedSearchUrl=http%3A…	65.4128	-52.8745	27809	Shogolev Igor	urn:lsid:catalogueoflife.org:taxon:e86689ae-18fd-11e5-9774-bc764e0806fb:col20150807	Somateria spectabilis	Animalia	Chordata	Aves	Anseriformes	Anatidae	Somateria	spectabilis	(Linnaeus, 1758)	ICZN	Somateria spectabilis (L.)
ZMUA	AVSE	ZMUA_Aves	ZMUA	PreservedSpecimen	1830-1425	GR-ZMUA_Aves-1830-1425	Schrader G.	1	M	adult	Whole animal (Stuffed)	1903-03-10	1830		GR	Abyssinia	Even though Eritrea belonged to Italy back when Shrader had visited the area, the collector was refering to it as Ethiopia. Therefore it is very probable that the location is in todays Eritrea.	10.6657	39.783	664046	Shogolev Igor	urn:lsid:catalogueoflife.org:taxon:e835b05b-18fd-11e5-9774-bc764e0806fb:col20150623	Chalcomitra senegalensis	Animalia	Chordata	Aves	Passeriformes	Nectariniidae	Chalcomitra	senegalensis	(Linnaeus, 1766)	ICZN	Nectarinia senegalensis
ZMUA	AVSE	ZMUA_Aves	ZMUA	PreservedSpecimen	2574-2169	GR-ZMUA_Aves-2574-2169	King George A'	1	F	adult	Whole animal (Stuffed)	1903-03-15	2574	Denmark	GR	Greenland (Sukkertoppen)	Coordinates according to: http://www.davidrumsey.com/luna/servlet/detail/RUMSEY~8~1~33206~1170575:Gletscherkarte-?showTip=false&showTipAdvancedSearch=false&title=Search+Results%3A+List_No+equal+to+%271578.006%27&thumbnailViewUrlKey=link.view.search.url&helpUrl=http%3A%2F%2Fdoc.lunaimaging.com%2Fdisplay%2FV71D%2FLUNA%2BViewer%23LUNAViewer-LUNAViewer&fullTextSearchChecked=&advancedSearchUrl=http%3A…	65.4128	-52.8745	27809	Shogolev Igor	urn:lsid:catalogueoflife.org:taxon:e8670d4c-18fd-11e5-9774-bc764e0806fb:col20150623	Anas platyrhynchos	Animalia	Chordata	Aves	Anseriformes	Anatidae	Anas	platyrhynchos	Linnaeus, 1758	ICZN	Anas platyrhynchos L.
ZMUA	AVSE	ZMUA_Aves	ZMUA	PreservedSpecimen	807-402	GR-ZMUA_Aves-807-402	Rosenberg-Schrader G.	1	M	adult	Whole animal (Stuffed)	1903-03-16	807	Eritrea	GR	Abyssinia (Arba-Schiko Anseba)	Coordinates for Anseba River, according to Getty Thesaurus of Geografic names	17.0833	37.4167		Shogolev Igor	urn:lsid:catalogueoflife.org:taxon:ee256a73-18fd-11e5-9774-bc764e0806fb:col20150623	Francolinus erckelii	Animalia	Chordata	Aves	Galliformes	Phasianidae	Francolinus	erckelii	(Rüppell, 1835)	ICZN	Francolinus erckelii Rüppell., 1835
ZMUA	AVSE	ZMUA_Aves	ZMUA	PreservedSpecimen	1046-641	GR-ZMUA_Aves-1046-641	King George A'	1	M	adult	Whole animal (Stuffed)	1903-03-20	1046	Denmark	GR	Greenland	Coordinates according to: http://bl.ocks.org/rdmpage/raw/9951904/	71.9737	-42.201	1354475	Shogolev Igor	urn:lsid:catalogueoflife.org:taxon:e86689ae-18fd-11e5-9774-bc764e0806fb:col20150807	Somateria spectabilis	Animalia	Chordata	Aves	Anseriformes	Anatidae	Somateria	spectabilis	(Linnaeus, 1758)	ICZN	Somateria spectabilis (L.)
ZMUA	AVSE	ZMUA_Aves	ZMUA	PreservedSpecimen	2995-2589	GR-ZMUA_Aves-2995-2589	King George A'	1	F	adult	Whole animal (Stuffed)	1903-03-08	2995	Denmark	GR	Greenland (Sukkertoppen)	Coordinates according to: http://www.davidrumsey.com/luna/servlet/detail/RUMSEY~8~1~33206~1170575:Gletscherkarte-?showTip=false&showTipAdvancedSearch=false&title=Search+Results%3A+List_No+equal+to+%271578.006%27&thumbnailViewUrlKey=link.view.search.url&helpUrl=http%3A%2F%2Fdoc.lunaimaging.com%2Fdisplay%2FV71D%2FLUNA%2BViewer%23LUNAViewer-LUNAViewer&fullTextSearchChecked=&advancedSearchUrl=http%3A…	65.4128	-52.8745	27809	Shogolev Igor	urn:lsid:catalogueoflife.org:taxon:e8668c6e-18fd-11e5-9774-bc764e0806fb:col20150807	Somateria mollissima	Animalia	Chordata	Aves	Anseriformes	Anatidae	Somateria	mollissima	(Linnaeus, 1758)	ICZN	Somateria mollissima L.
ZMUA	AVSE	ZMUA_Aves	ZMUA	PreservedSpecimen	411-6	GR-ZMUA_Aves-411-6	Schlüter W.	1	F	adult	Whole animal (Stuffed)	1903-04-04	411	Algeria	GR	Algeria (Bone)	Annaba is the new name for Bone	36.9003	7.75637	2959	Shogolev Igor	urn:lsid:catalogueoflife.org:taxon:ee1e8f3e-18fd-11e5-9774-bc764e0806fb:col20150623	Chlidonias niger	Animalia	Chordata	Aves	Charadriiformes	Laridae	Chlidonias	niger	(Linnaeus, 1758)	ICZN	Chlidonias nigra (L.)
ZMUA	AVSE	ZMUA_Aves	ZMUA	PreservedSpecimen	418-13	GR-ZMUA_Aves-418-13	Schlüter W.	1	M	adult	Whole animal (Stuffed)	1903-04-04	418	Algeria	GR	Algeria (Bone)	Annaba is the new name for Bone	36.9003	7.75637	2959	Shogolev Igor	urn:lsid:catalogueoflife.org:taxon:ee1e8f3e-18fd-11e5-9774-bc764e0806fb:col20150623	Chlidonias niger	Animalia	Chordata	Aves	Charadriiformes	Laridae	Chlidonias	niger	(Linnaeus, 1758)	ICZN	Chlidonias nigra (L.)
ZMUA	AVSE	ZMUA_Aves	ZMUA	PreservedSpecimen	1589-1184	GR-ZMUA_Aves-1589-1184	Schrader G.	1	M	adult	Whole animal (Stuffed)	1903-04-15	1589	Eritrea	GR	Abyssinia (Ailet)		16.3396	38.8741		Shogolev Igor	urn:lsid:catalogueoflife.org:taxon:fbc42a3d-18fd-11e5-9774-bc764e0806fb:col20150623	Halcyon albiventris	Animalia	Chordata	Aves	Coraciiformes	Alcedinidae	Halcyon	albiventris	(Scopoli, 1786)	ICZN	Halcyon albiventris Scopoli 1786
ZMUA	AVSE	ZMUA_Aves	ZMUA	PreservedSpecimen	2643-2238	GR-ZMUA_Aves-2643-2238	Schlüter W.	1	F	adult	Whole animal (Stuffed)	1903-04-18	2643		GR	Turnschonsk					Shogolev Igor	urn:lsid:catalogueoflife.org:taxon:e8667460-18fd-11e5-9774-bc764e0806fb:col20150730	Mergellus albellus	Animalia	Chordata	Aves	Anseriformes	Anatidae	Mergellus	albellus	(Linnaeus, 1758)	ICZN	Mergus albellus
ZMUA	AVSE	ZMUA_Aves	ZMUA	PreservedSpecimen	2819-2414	GR-ZMUA_Aves-2819-2414	Strimeneas	1	M	adult	Whole animal (Stuffed)	1903-04-27	2819	Greece	GR	Lamia	Coordinates according to: http://bl.ocks.org/rdmpage/raw/9951904/	38.8966	22.4392	1371	Shogolev Igor	urn:lsid:catalogueoflife.org:taxon:e821bc38-18fd-11e5-9774-bc764e0806fb:col20150623	Hippolais icterina	Animalia	Chordata	Aves	Passeriformes	Acrocephalidae	Hippolais	icterina	(Vieillot, 1817)	ICZN	Hippolais icterina (Vieill.)
ZMUA	AVSE	ZMUA_Aves	ZMUA	PreservedSpecimen	1628-1223	GR-ZMUA_Aves-1628-1223	Rosenberg-Schrader G.	1	M	adult	Whole animal (Stuffed)	1903-05-15	1628	Eritrea	GR	Abyssinia (Arafali-Dankali)	Coordinates for Arafali, according to Getty Thesaurus of Geografic names	15.05	39.7167		Shogolev Igor	urn:lsid:catalogueoflife.org:taxon:245dcb71-18fe-11e5-9774-bc764e0806fb:col20150807	Todiramphus chloris chloris	Animalia	Chordata	Aves	Coraciiformes	Alcedinidae	Todiramphus	chloris	(Boddaert, 1783)	ICZN	Todiramphus chloris chloris Boddaert, 1783
ZMUA	AVSE	ZMUA_Aves	ZMUA	PreservedSpecimen	1636-1231	GR-ZMUA_Aves-1636-1231		1	M	adult	Whole animal (Stuffed)	1903-07-02	1636		GR	Gothland		57.4684	18.4867		Shogolev Igor	urn:lsid:catalogueoflife.org:taxon:0d19501e-18fe-11e5-9774-bc764e0806fb:col20150623	Chroicocephalus ridibundus	Animalia	Chordata	Aves	Charadriiformes	Laridae	Chroicocephalus	ridibundus	(Linnaeus, 1766)	ICZN	Larus ridibundus
ZMUA	AVSE	ZMUA_Aves	ZMUA	PreservedSpecimen	2999-2593	GR-ZMUA_Aves-2999-2593	King George A'	1	F	adult	Whole animal (Stuffed)	1903-08-08	2999	Denmark	GR	Greenland	Coordinates according to: http://bl.ocks.org/rdmpage/raw/9951904/	71.9737	-42.201	1354475	Shogolev Igor	urn:lsid:catalogueoflife.org:taxon:ee1b6e47-18fd-11e5-9774-bc764e0806fb:col20150807	Stercorarius parasiticus	Animalia	Chordata	Aves	Charadriiformes	Stercorariidae	Stercorarius	parasiticus	(Linnaeus, 1758)	ICZN	Stercocarius parasiticus (L.)
ZMUA	AVSE	ZMUA_Aves	ZMUA	PreservedSpecimen	1243-838	GR-ZMUA_Aves-1243-838	Borghini T.	1	F		Whole animal (Stuffed)	1903-09-24	1243	Greece	GR	Attica	Coordinates according to: http://bl.ocks.org/rdmpage/raw/9951904/	37.9789	23.6696	50004	Shogolev Igor	urn:lsid:catalogueoflife.org:taxon:e855376f-18fd-11e5-9774-bc764e0806fb:col20150623	Falco tinnunculus	Animalia	Chordata	Aves	Falconiformes	Falconidae	Falco	tinnunculus	Linnaeus, 1758	ICZN	Falco tinnunculus
ZMUA	AVSE	ZMUA_Aves	ZMUA	PreservedSpecimen	2355-1950	GR-ZMUA_Aves-2355-1950	Strimeneas	1	F	adult	Whole animal (Stuffed)	1903-10-20	2355	Greece	GR	Tetranisa	Coordinates according to historical data: In 1823 four islands: Patmos, Leros, Kalymnos and Ikaria were named Tetranisa.	37.3591	26.5586	64437	Shogolev Igor	urn:lsid:catalogueoflife.org:taxon:0d1917af-18fe-11e5-9774-bc764e0806fb:col20150730	Microcarbo pygmaeus	Animalia	Chordata	Aves	Suliformes	Phalacrocoracidae	Microcarbo	pygmaeus	(Pallas, 1773)	ICZN	Phalacrocorax pygmaeus
ZMUA	AVSE	ZMUA_Aves	ZMUA	PreservedSpecimen	535-130	GR-ZMUA_Aves-535-130	Schlüter W.	1	F	adult	Whole animal (Stuffed)	1904-01-03	535	Spain	GR	Spain (Malaga)	Coordinates according to: http://bl.ocks.org/rdmpage/raw/9951904/	36.7054	-4.45114	5632	Shogolev Igor	urn:lsid:catalogueoflife.org:taxon:2199acf1-18fe-11e5-9774-bc764e0806fb:col20150623	Larus fuscus fuscus	Animalia	Chordata	Aves	Charadriiformes	Laridae	Larus	fuscus	Linnaeus, 1758	ICZN	Larus fuscus fuscus
ZMUA	AVSE	ZMUA_Aves	ZMUA	PreservedSpecimen	1038-633	GR-ZMUA_Aves-1038-633	Sterlin	1	F	adult	Whole animal (Stuffed)	1904-01-11	1038	Greece	GR	Lamia	Coordinates according to: http://bl.ocks.org/rdmpage/raw/9951904/	38.8966	22.4392	1371	Shogolev Igor	urn:lsid:catalogueoflife.org:taxon:e866f81a-18fd-11e5-9774-bc764e0806fb:col20150623	Anas clypeata	Animalia	Chordata	Aves	Anseriformes	Anatidae	Anas	clypeata	Linnaeus, 1758	ICZN	Anas clypeata L.
ZMUA	AVSE	ZMUA_Aves	ZMUA	PreservedSpecimen	2717-2312	GR-ZMUA_Aves-2717-2312	Napsilidis	1	F	juvenile	Whole animal (Stuffed)	1904-01-12	2717	Greece	GR	Attica	Coordinates according to: http://bl.ocks.org/rdmpage/raw/9951904/	37.9789	23.6696	50004	Shogolev Igor	urn:lsid:catalogueoflife.org:taxon:ee1ef24f-18fd-11e5-9774-bc764e0806fb:col20150623	Gallinula chloropus	Animalia	Chordata	Aves	Gruiformes	Rallidae	Gallinula	chloropus	(Linnaeus, 1758)	ICZN	Gallinula chloropus (L.)
ZMUA	AVSE	ZMUA_Aves	ZMUA	PreservedSpecimen	725-320	GR-ZMUA_Aves-725-320	Schlüter W.	1	F	adult	Whole animal (Stuffed)	1904-01-12	725		GR	Romania	Coordinates according to: http://upload.wikimedia.org/wikipedia/commons/e/ea/RomaniaBorderHistoryAnnimation_1859-2010.gif	45.3559	26.3031	281983	Shogolev Igor	urn:lsid:catalogueoflife.org:taxon:e8670122-18fd-11e5-9774-bc764e0806fb:col20150623	Anas querquedula	Animalia	Chordata	Aves	Anseriformes	Anatidae	Anas	querquedula	Linnaeus, 1758	ICZN	Anas querquedula
ZMUA	AVSE	ZMUA_Aves	ZMUA	PreservedSpecimen	849-444	GR-ZMUA_Aves-849-444	Strimeneas	1	M	adult	Whole animal (Stuffed)	1904-01-27	849	Greece	GR	Zakynthos (Strofades)	Coordinates according to: http://bl.ocks.org/rdmpage/raw/9951904/	37.2468	21.0128	1190	Shogolev Igor	urn:lsid:catalogueoflife.org:taxon:ee2049ec-18fd-11e5-9774-bc764e0806fb:col20150623	Calonectris diomedea	Animalia	Chordata	Aves	Procellariiformes	Procellariidae	Calonectris	diomedea	(Scopoli, 1769)	ICZN	Calonectris diomedea
ZMUA	AVSE	ZMUA_Aves	ZMUA	PreservedSpecimen	479-74	GR-ZMUA_Aves-479-74	Strimeneas	1	F		Whole animal (Stuffed)	1904-05-10	479	Greece	GR	Hymettus	Coordinates according to: http://bl.ocks.org/rdmpage/raw/9951904/	37.9243	23.8045	11686	Shogolev Igor	urn:lsid:catalogueoflife.org:taxon:e81f202f-18fd-11e5-9774-bc764e0806fb:col20150730	Monticola saxatilis	Animalia	Chordata	Aves	Passeriformes	Muscicapidae	Monticola	saxatilis	(Linnaeus, 1766)	ICZN	Monticola saxatilis (L.)
ZMUA	AVSE	ZMUA_Aves	ZMUA	PreservedSpecimen	413-8	GR-ZMUA_Aves-413-8	Schlüter W.	1	F	adult	Whole animal (Stuffed)	1904-05-27	413	Italy	GR	Italy (Cremona)	Coordinates according to: http://bl.ocks.org/rdmpage/raw/9951904/	45.1327	10.0295	4507	Shogolev Igor	urn:lsid:catalogueoflife.org:taxon:0d19501e-18fe-11e5-9774-bc764e0806fb:col20150623	Chroicocephalus ridibundus	Animalia	Chordata	Aves	Charadriiformes	Laridae	Chroicocephalus	ridibundus	(Linnaeus, 1766)	ICZN	Larus ridibundus L.
ZMUA	AVSE	ZMUA_Aves	ZMUA	PreservedSpecimen	2868-2463	GR-ZMUA_Aves-2868-2463	Strimeneas	1	M	adult	Whole animal (Stuffed)	1904-11-15	2868	Greece	GR	Mount Othrys	Coordinates according to: http://bl.ocks.org/rdmpage/raw/9951904/	39.015	22.7139	4536	Shogolev Igor	urn:lsid:catalogueoflife.org:taxon:e6f30236-18fd-11e5-9774-bc764e0806fb:col20150623	Aegithalos caudatus	Animalia	Chordata	Aves	Passeriformes	Aegithalidae	Aegithalos	caudatus	(Linnaeus, 1758)	ICZN	Aegithalos caudatus (L.)
ZMUA	AVSE	ZMUA_Aves	ZMUA	PreservedSpecimen	2869-2464	GR-ZMUA_Aves-2869-2464	Strimeneas	1	M	adult	Whole animal (Stuffed)	1904-11-15	2869	Greece	GR	Mount Othrys	Coordinates according to: http://bl.ocks.org/rdmpage/raw/9951904/	39.015	22.7139	4536	Shogolev Igor	urn:lsid:catalogueoflife.org:taxon:e6f30236-18fd-11e5-9774-bc764e0806fb:col20150623	Aegithalos caudatus	Animalia	Chordata	Aves	Passeriformes	Aegithalidae	Aegithalos	caudatus	(Linnaeus, 1758)	ICZN	Aegithalos caudatus (L.)
ZMUA	AVSE	ZMUA_Aves	ZMUA	PreservedSpecimen	971-566	GR-ZMUA_Aves-971-566	Schlüter W.	1	M	adult	Whole animal (Stuffed)	1904-11-20	971	Morocco	GR	Morocco	Coordinates according to: http://bl.ocks.org/rdmpage/raw/9951904/	31.1582	-6.69583	770382	Shogolev Igor	urn:lsid:catalogueoflife.org:taxon:ee1e9d7e-18fd-11e5-9774-bc764e0806fb:col20150807	Thalasseus sandvicensis	Animalia	Chordata	Aves	Charadriiformes	Laridae	Thalasseus	sandvicensis	(Latham, 1787)	ICZN	Thalasseus sandvicensis (Lath.)
ZMUA	AVSE	ZMUA_Aves	ZMUA	PreservedSpecimen	1738-1333	GR-ZMUA_Aves-1738-1333		1			Whole animal (Stuffed)	1806	1738		GR						Shogolev Igor	urn:lsid:catalogueoflife.org:taxon:0d19501e-18fe-11e5-9774-bc764e0806fb:col20150623	Chroicocephalus ridibundus	Animalia	Chordata	Aves	Charadriiformes	Laridae	Chroicocephalus	ridibundus	(Linnaeus, 1766)	ICZN	Larus ridibundus
ZMUA	AVSE	ZMUA_Aves	ZMUA	PreservedSpecimen	449-44	GR-ZMUA_Aves-449-44	Bangert	1	F	adult	Whole animal (Stuffed)	1904-12-13	449	Denmark	GR	Greenland (Sukkertoppen)	Coordinates according to: http://www.davidrumsey.com/luna/servlet/detail/RUMSEY~8~1~33206~1170575:Gletscherkarte-?showTip=false&showTipAdvancedSearch=false&title=Search+Results%3A+List_No+equal+to+%271578.006%27&thumbnailViewUrlKey=link.view.search.url&helpUrl=http%3A%2F%2Fdoc.lunaimaging.com%2Fdisplay%2FV71D%2FLUNA%2BViewer%23LUNAViewer-LUNAViewer&fullTextSearchChecked=&advancedSearchUrl=http%3A…	65.4128	-52.8745	27809	Shogolev Igor	urn:lsid:catalogueoflife.org:taxon:0d19501e-18fe-11e5-9774-bc764e0806fb:col20150623	Chroicocephalus ridibundus	Animalia	Chordata	Aves	Charadriiformes	Laridae	Chroicocephalus	ridibundus	(Linnaeus, 1766)	ICZN	Larus ridibundus L.
ZMUA	AVSE	ZMUA_Aves	ZMUA	PreservedSpecimen	1646-1241	GR-ZMUA_Aves-1646-1241	E.T.T.E.	1			Whole animal (Stuffed)	1819	1646		GR						Shogolev Igor	urn:lsid:catalogueoflife.org:taxon:e859493e-18fd-11e5-9774-bc764e0806fb:col20150623	Gavia arctica	Animalia	Chordata	Aves	Gaviiformes	Gaviidae	Gavia	arctica	(Linnaeus, 1758)	ICZN	Gavia arctica
ZMUA	AVSE	ZMUA_Aves	ZMUA	PreservedSpecimen	924-519	GR-ZMUA_Aves-924-519		1	F	adult	Whole animal (Stuffed)	1828	924	Austria	GR	Austria (Carinthia)	Coordinates according to: http://bl.ocks.org/rdmpage/raw/9951904/	46.7876	13.6246	101685	Shogolev Igor	urn:lsid:catalogueoflife.org:taxon:fc7b1a44-18fd-11e5-9774-bc764e0806fb:col20150623	Lagopus muta	Animalia	Chordata	Aves	Galliformes	Phasianidae	Lagopus	muta	(Montin, 1781)	ICZN	Lagopus mutus Montin, 1776
ZMUA	AVSE	ZMUA_Aves	ZMUA	PreservedSpecimen	772-367	GR-ZMUA_Aves-772-367		1		pullus	Whole animal (Stuffed)	1840	772	Greece	GR	Athens	Coordinates according to: http://bl.ocks.org/rdmpage/raw/9951904/	37.9833	23.7333	9880	Shogolev Igor	urn:lsid:catalogueoflife.org:taxon:ea0468a2-18fd-11e5-9774-bc764e0806fb:col20150807	Pavo cristatus	Animalia	Chordata	Aves	Galliformes	Phasianidae	Pavo	cristatus	Linnaeus, 1758	ICZN	Pavo cristatus L., 1758
ZMUA	AVSE	ZMUA_Aves	ZMUA	PreservedSpecimen	2004-1599	GR-ZMUA_Aves-2004-1599	Krüper Th.	1	M	adult	Whole animal (Stuffed)	1848	2004	Germany	GR	Heligoland	Coordinates according to: http://bl.ocks.org/rdmpage/raw/9951904/	54.1821	7.89005	2157	Shogolev Igor	urn:lsid:catalogueoflife.org:taxon:e7c16f9c-18fd-11e5-9774-bc764e0806fb:col20150623	Calcarius lapponicus	Animalia	Chordata	Aves	Passeriformes	Emberizidae	Calcarius	lapponicus	(Linnaeus, 1758)	ICZN	Calcarius lapponicus (L.)
ZMUA	AVSE	ZMUA_Aves	ZMUA	PreservedSpecimen	1652-1247	GR-ZMUA_Aves-1652-1247	Parzoudaki	1			Whole animal (Stuffed)	1850	1652	Colombia	GR	Colombia	Coordinates according to: http://bl.ocks.org/rdmpage/raw/9951904/	3.75998	-72.6178	947417	Shogolev Igor	urn:lsid:catalogueoflife.org:taxon:f7400231-18fd-11e5-9774-bc764e0806fb:col20150623	Eupetomena macroura	Animalia	Chordata	Aves	Apodiformes	Trochilidae	Eupetomena	macroura	(Gmelin, 1788)	ICZN	Campylopterus macrourus J. F. Gmelin, 1788
ZMUA	AVSE	ZMUA_Aves	ZMUA	PreservedSpecimen	2649-2244	GR-ZMUA_Aves-2649-2244		1	F	adult	Whole animal (Stuffed)	1850	2649	Greece	GR	Faliro	Coordinates according to: http://bl.ocks.org/rdmpage/raw/9951904/	37.931	23.699	1815	Shogolev Igor	urn:lsid:catalogueoflife.org:taxon:e8249f18-18fd-11e5-9774-bc764e0806fb:col20150730	Motacilla flava	Animalia	Chordata	Aves	Passeriformes	Motacillidae	Motacilla	flava	Linnaeus, 1758	ICZN	Motacilla flava L.
ZMUA	AVSE	ZMUA_Aves	ZMUA	PreservedSpecimen	1621-1216	GR-ZMUA_Aves-1621-1216	Touzet N.	1			Whole animal (Stuffed)	1853	1621	Brazil	GR	Brazil	Coordinates according to: http://bl.ocks.org/rdmpage/raw/9951904/	-12.607	-54.423	2281819	Shogolev Igor	urn:lsid:catalogueoflife.org:taxon:ee137209-18fd-11e5-9774-bc764e0806fb:col20150623	Chloroceryle americana	Animalia	Chordata	Aves	Coraciiformes	Alcedinidae	Chloroceryle	americana	(Gmelin, 1788)	ICZN	Chloroceryle americana J. F. Gmelin, 1788
ZMUA	AVSE	ZMUA_Aves	ZMUA	PreservedSpecimen	1354-949	GR-ZMUA_Aves-1354-949	E.T.T.E.	1			Whole animal (Stuffed)	1854	1354		GR						Shogolev Igor	urn:lsid:catalogueoflife.org:taxon:e836aebb-18fd-11e5-9774-bc764e0806fb:col20150807	Urocissa erythroryncha	Animalia	Chordata	Aves	Passeriformes	Corvidae	Urocissa	erythroryncha	(Boddaert, 1783)	ICZN	Urocissa erythrorhyncha
ZMUA	AVSE	ZMUA_Aves	ZMUA	PreservedSpecimen	995-590	GR-ZMUA_Aves-995-590	Villard C. d.	1			Whole animal (Stuffed)	1854	995	Brazil	GR	Brazil	Coordinates according to: http://bl.ocks.org/rdmpage/raw/9951904/	-12.607	-54.423	2281819	Shogolev Igor	urn:lsid:catalogueoflife.org:taxon:e7c83f12-18fd-11e5-9774-bc764e0806fb:col20150807	Tersina viridis	Animalia	Chordata	Aves	Passeriformes	Thraupidae	Tersina	viridis	(Illiger, 1811)	ICZN	Tersina viridis
ZMUA	AVSE	ZMUA_Aves	ZMUA	PreservedSpecimen	553-148	GR-ZMUA_Aves-553-148	E.T.T.E.	1	F		Whole animal (Stuffed)	1858	553	Greece	GR	Attica	Coordinates according to: http://bl.ocks.org/rdmpage/raw/9951904/	37.9789	23.6696	50004	Shogolev Igor	urn:lsid:catalogueoflife.org:taxon:eb8b1fb0-18fd-11e5-9774-bc764e0806fb:col20150623	Circus cyaneus	Animalia	Chordata	Aves	Accipitriformes	Accipitridae	Circus	cyaneus	(Linnaeus, 1766)	ICZN	Circus cyaneus (L.)
ZMUA	AVSE	ZMUA_Aves	ZMUA	PreservedSpecimen	2747-2342	GR-ZMUA_Aves-2747-2342	E.T.T.E.	1	M	adult	Whole animal (Stuffed)	1858	2747	Greece	GR	Attica	Coordinates according to: http://bl.ocks.org/rdmpage/raw/9951904/	37.9789	23.6696	50004	Shogolev Igor	urn:lsid:catalogueoflife.org:taxon:fb5dceba-18fd-11e5-9774-bc764e0806fb:col20150623	Calidris alpina	Animalia	Chordata	Aves	Charadriiformes	Scolopacidae	Calidris	alpina	(Linnaeus, 1758)	ICZN	Calidris alpina (L.)
ZMUA	AVSE	ZMUA_Aves	ZMUA	PreservedSpecimen	2993-2587	GR-ZMUA_Aves-2993-2587	E.T.T.E.	1	F	adult	Whole animal (Stuffed)	1858	2993	Greece	GR	Attica	Coordinates according to: http://bl.ocks.org/rdmpage/raw/9951904/	37.9789	23.6696	50004	Shogolev Igor	urn:lsid:catalogueoflife.org:taxon:e7b9df3d-18fd-11e5-9774-bc764e0806fb:col20150807	Sturnus vulgaris	Animalia	Chordata	Aves	Passeriformes	Sturnidae	Sturnus	vulgaris	Linnaeus, 1758	ICZN	Sturnus vulgaris L.
ZMUA	AVSE	ZMUA_Aves	ZMUA	PreservedSpecimen	1998-1593	GR-ZMUA_Aves-1998-1593	E.T.T.E.	1			Whole animal (Stuffed)	1858	1998	Greece	GR	Attica	Coordinates according to: http://bl.ocks.org/rdmpage/raw/9951904/	37.9789	23.6696	50004	Shogolev Igor	urn:lsid:catalogueoflife.org:taxon:ee1ef24f-18fd-11e5-9774-bc764e0806fb:col20150623	Gallinula chloropus	Animalia	Chordata	Aves	Gruiformes	Rallidae	Gallinula	chloropus	(Linnaeus, 1758)	ICZN	Gallinula chloropus (L.)
ZMUA	AVSE	ZMUA_Aves	ZMUA	PreservedSpecimen	963-558	GR-ZMUA_Aves-963-558	E.T.T.E.	1	F	adult	Whole animal (Stuffed)	1858	963		GR	India	Coordinates according to: http://www.davidrumsey.com/luna/servlet/detail/RUMSEY~8~1~209897~5003705:India-?showTip=false&showTipAdvancedSearch=false&title=Search+Results%3A+List_No+equal+to+%271550.100%27&thumbnailViewUrlKey=link.view.search.url&helpUrl=http%3A%2F%2Fdoc.lunaimaging.com%2Fdisplay%2FV71D%2FLUNA%2BViewer%23LUNAViewer-LUNAViewer&fullTextSearchChecked=&advancedSearchUrl=http%3A%2F%2Fdo…	23.7268	83.8993	2005716	Shogolev Igor	urn:lsid:catalogueoflife.org:taxon:f111d7a9-18fd-11e5-9774-bc764e0806fb:col20150623	Lophura leucomelanos	Animalia	Chordata	Aves	Galliformes	Phasianidae	Lophura	leucomelanos	(Latham, 1790)	ICZN	Lophura leucomelanos Latham, 1790
ZMUA	AVSE	ZMUA_Aves	ZMUA	PreservedSpecimen	2652-2247	GR-ZMUA_Aves-2652-2247	Guicciardi	1		juvenile	Whole animal (Stuffed)	1858	2652	Greece	GR	Attica	Coordinates according to: http://bl.ocks.org/rdmpage/raw/9951904/	37.9789	23.6696	50004	Shogolev Igor	urn:lsid:catalogueoflife.org:taxon:ec0d7edc-ac8e-11e3-805d-020044200006:col20150401	Ixobrychus minutus	Animalia	Chordata	Aves	Pelecaniformes	Ardeidae	Ixobrychus	minutus	(Linnaeus, 1766)	ICZN	Ixobrychus minutus (L.)
ZMUA	AVSE	ZMUA_Aves	ZMUA	PreservedSpecimen	1858-1453	GR-ZMUA_Aves-1858-1453		1	F	adult	Whole animal (Stuffed)	1858	1858	Greece	GR	Attica	Coordinates according to: http://bl.ocks.org/rdmpage/raw/9951904/	37.9789	23.6696	50004	Shogolev Igor	urn:lsid:catalogueoflife.org:taxon:e7bae1a5-18fd-11e5-9774-bc764e0806fb:col20150807	Oriolus oriolus	Animalia	Chordata	Aves	Passeriformes	Oriolidae	Oriolus	oriolus	(Linnaeus, 1758)	ICZN	Oriolus oriolus (L.)
ZMUA	AVSE	ZMUA_Aves	ZMUA	PreservedSpecimen	1802-1397	GR-ZMUA_Aves-1802-1397	E.T.T.E.	1			Whole animal (Stuffed)	1859	1802	Australia	GR	Australia (Nov. Holland)	Nouvelle Hollande refers either to Australia as an island, or to the western part of it that was not endorsed by the British. Therefore coordinates are for Australia.	-23.5729	133.839	2114745	Papastefanou Gabriella	urn:lsid:catalogueoflife.org:taxon:caa9a702-8ed6-11e5-b7d1-bc764e092680:col20151110	Anthochaera chrysoptera	Animalia	Chordata	Aves	Passeriformes	Meliphagidae	Anthochaera	chrysoptera	(Latham, 1802)	ICZN	Anthochaera chrysoptera
ZMUA	AVSE	ZMUA_Aves	ZMUA	PreservedSpecimen	2128-1723	GR-ZMUA_Aves-2128-1723	E.T.T.E.	1			Whole animal (Stuffed)	1859	2128		GR	SE Africa	According to Unicef, nations belonging to the broader region of Southeast Africa are the ones included in the area indicated by the coordinates and unceertainty meters. Madagascar and adjacent islands such as Reunion and Comoros, are not included: http://www.unicef.org/esaro/theregion.html	-1.85924	29.3711	3764995	Shogolev Igor	urn:lsid:catalogueoflife.org:taxon:e753b442-18fd-11e5-9774-bc764e0806fb:col20150623	Euplectes franciscanus	Animalia	Chordata	Aves	Passeriformes	Ploceidae	Euplectes	franciscanus	(Isert, 1789)	ICZN	Euplectes franciscana
ZMUA	AVSE	ZMUA_Aves	ZMUA	PreservedSpecimen	1427-1022	GR-ZMUA_Aves-1427-1022	E.T.T.E.	1			Whole animal (Stuffed)	1859	1427		GR	America Mer.	America Mer. Stands for America Meridionalis which is South America	-20.7716	-58.4234	3930928	Shogolev Igor	urn:lsid:catalogueoflife.org:taxon:e6eedba0-18fd-11e5-9774-bc764e0806fb:col20150807	Philemon corniculatus	Animalia	Chordata	Aves	Passeriformes	Meliphagidae	Philemon	corniculatus	(Latham, 1790)	ICZN	Philemon corniculatus
ZMUA	AVSE	ZMUA_Aves	ZMUA	PreservedSpecimen	2977-2571	GR-ZMUA_Aves-2977-2571	E.T.T.E.	1	F	adult	Whole animal (Stuffed)	1859	2977	Greece	GR	Attica	Coordinates according to: http://bl.ocks.org/rdmpage/raw/9951904/	37.9789	23.6696	50004	Shogolev Igor	urn:lsid:catalogueoflife.org:taxon:ec0d7edc-ac8e-11e3-805d-020044200006:col20150401	Ixobrychus minutus	Animalia	Chordata	Aves	Pelecaniformes	Ardeidae	Ixobrychus	minutus	(Linnaeus, 1766)	ICZN	Ixobrychus minutus (L.)
ZMUA	AVSE	ZMUA_Aves	ZMUA	PreservedSpecimen	1004-599	GR-ZMUA_Aves-1004-599	E.T.T.E.	1			Whole animal (Stuffed)	1859	1004		GR	Africa	Coordinates according to: http://bl.ocks.org/rdmpage/raw/9951904/	2.31186	15.7562	4243522	Shogolev Igor	urn:lsid:catalogueoflife.org:taxon:f695e9c4-18fd-11e5-9774-bc764e0806fb:col20150623	Bubo lacteus	Animalia	Chordata	Aves	Strigiformes	Strigidae	Bubo	lacteus	(Temminck, 1820)	ICZN	Bubo lacteus Temminck, 1820
ZMUA	AVSE	ZMUA_Aves	ZMUA	PreservedSpecimen	2072-1667	GR-ZMUA_Aves-2072-1667	E.T.T.E.	1			Whole animal (Stuffed)	1859	2072	Mexico	GR	Mexico	Coordinates according to: http://bl.ocks.org/rdmpage/raw/9951904/	23.9501	-102.947	1738309	Shogolev Igor	urn:lsid:catalogueoflife.org:taxon:e625ce72-18fd-11e5-9774-bc764e0806fb:col20150807	Psarocolius decumanus	Animalia	Chordata	Aves	Passeriformes	Icteridae	Psarocolius	decumanus	(Pallas, 1769)	ICZN	Psarocolius decumanus Pallas, 1769
ZMUA	AVSE	ZMUA_Aves	ZMUA	PreservedSpecimen	1336-931	GR-ZMUA_Aves-1336-931	E.T.T.E.	1			Whole animal (Stuffed)	1859	1336		GR	Africa	Coordinates according to: http://bl.ocks.org/rdmpage/raw/9951904/	2.31186	15.7562	4243522	Shogolev Igor	urn:lsid:catalogueoflife.org:taxon:ee2010ef-18fd-11e5-9774-bc764e0806fb:col20150623	Centropus superciliosus	Animalia	Chordata	Aves	Cuculiformes	Cuculidae	Centropus	superciliosus	Hemprich & Ehrenberg, 1829	ICZN	Certropus superciliosus Hamprich & Ehrenberg, 1833
ZMUA	AVSE	ZMUA_Aves	ZMUA	PreservedSpecimen	1138-733	GR-ZMUA_Aves-1138-733	E.T.T.E.	1			Whole animal (Stuffed)	1859	1138		GR	Africa	Coordinates according to: http://bl.ocks.org/rdmpage/raw/9951904/	2.31186	15.7562	4243522	Shogolev Igor	urn:lsid:catalogueoflife.org:taxon:ee20f478-18fd-11e5-9774-bc764e0806fb:col20150807	Urocolius macrourus	Animalia	Chordata	Aves	Coliiformes	Coliidae	Urocolius	macrourus	(Linnaeus, 1766)	ICZN	Urocolius macrourus L., 1766
ZMUA	AVSE	ZMUA_Aves	ZMUA	PreservedSpecimen	1140-735	GR-ZMUA_Aves-1140-735	E.T.T.E.	1		adult	Whole animal (Stuffed)	1859	1140		GR	Africa	Coordinates according to: http://bl.ocks.org/rdmpage/raw/9951904/	2.31186	15.7562	4243522	Shogolev Igor	urn:lsid:catalogueoflife.org:taxon:ee20f478-18fd-11e5-9774-bc764e0806fb:col20150807	Urocolius macrourus	Animalia	Chordata	Aves	Coliiformes	Coliidae	Urocolius	macrourus	(Linnaeus, 1766)	ICZN	Urocolius macrourus L., 1766
ZMUA	AVSE	ZMUA_Aves	ZMUA	PreservedSpecimen	1633-1228	GR-ZMUA_Aves-1633-1228	E.T.T.E.	1			Whole animal (Stuffed)	1859	1633		GR	Africa	Coordinates according to: http://bl.ocks.org/rdmpage/raw/9951904/	2.31186	15.7562	4243522	Shogolev Igor	urn:lsid:catalogueoflife.org:taxon:031249c7-18fe-11e5-9774-bc764e0806fb:col20150623	Coracias naevius	Animalia	Chordata	Aves	Coraciiformes	Coraciidae	Coracias	naevius	Daudin, 1800	ICZN	Coracias naevius Daudin, 1800
ZMUA	AVSE	ZMUA_Aves	ZMUA	PreservedSpecimen	1693-1288	GR-ZMUA_Aves-1693-1288	E.T.T.E.	1	M	adult	Whole animal (Stuffed)	1859	1693	Brazil	GR	Brazil	Coordinates according to: http://bl.ocks.org/rdmpage/raw/9951904/	-12.607	-54.423	2281819	Shogolev Igor	urn:lsid:catalogueoflife.org:taxon:e7b0cd2d-18fd-11e5-9774-bc764e0806fb:col20150623	Euphonia violacea	Animalia	Chordata	Aves	Passeriformes	Thraupidae	Euphonia	violacea	(Linnaeus, 1758)	ICZN	Euphonia violacea
ZMUA	AVSE	ZMUA_Aves	ZMUA	PreservedSpecimen	537-132	GR-ZMUA_Aves-537-132	E.T.T.E.	1	M	juvenile	Whole animal (Stuffed)	1859	537	Greece	GR	Attica	Coordinates according to: http://bl.ocks.org/rdmpage/raw/9951904/	37.9789	23.6696	50004	Shogolev Igor	urn:lsid:catalogueoflife.org:taxon:eb8b1619-18fd-11e5-9774-bc764e0806fb:col20150623	Circus macrourus	Animalia	Chordata	Aves	Accipitriformes	Accipitridae	Circus	macrourus	(S. G. Gmelin, 1770)	ICZN	Circus macrourus (L.)
ZMUA	AVSE	ZMUA_Aves	ZMUA	PreservedSpecimen	1033-628	GR-ZMUA_Aves-1033-628	E.T.T.E.	1	M	adult	Whole animal (Stuffed)	1859	1033	Greece	GR	Attica	Coordinates according to: http://bl.ocks.org/rdmpage/raw/9951904/	37.9789	23.6696	50004	Shogolev Igor	urn:lsid:catalogueoflife.org:taxon:e85510a4-18fd-11e5-9774-bc764e0806fb:col20150623	Falco vespertinus	Animalia	Chordata	Aves	Falconiformes	Falconidae	Falco	vespertinus	Linnaeus, 1766	ICZN	Falco vespertinus L.
ZMUA	AVSE	ZMUA_Aves	ZMUA	PreservedSpecimen	1926-1521	GR-ZMUA_Aves-1926-1521	E.T.T.E.	1			Whole animal (Stuffed)	1859	1926		GR	Africa	Coordinates according to: http://bl.ocks.org/rdmpage/raw/9951904/	2.31186	15.7562	4243522	Shogolev Igor	urn:lsid:catalogueoflife.org:taxon:e7bb80a1-18fd-11e5-9774-bc764e0806fb:col20150807	Vidua purpurascens	Animalia	Chordata	Aves	Passeriformes	Viduidae	Vidua	purpurascens	(Reichenow, 1883)	ICZN	Vidua purpurascens
ZMUA	AVSE	ZMUA_Aves	ZMUA	PreservedSpecimen	1928-1523	GR-ZMUA_Aves-1928-1523	E.T.T.E.	1			Whole animal (Stuffed)	1859	1928		GR	Africa	Coordinates according to: http://bl.ocks.org/rdmpage/raw/9951904/	2.31186	15.7562	4243522	Shogolev Igor	urn:lsid:catalogueoflife.org:taxon:e7bb80a1-18fd-11e5-9774-bc764e0806fb:col20150807	Vidua purpurascens	Animalia	Chordata	Aves	Passeriformes	Viduidae	Vidua	purpurascens	(Reichenow, 1883)	ICZN	Vidua purpurascens
ZMUA	AVSE	ZMUA_Aves	ZMUA	PreservedSpecimen	885-480	GR-ZMUA_Aves-885-480	E.T.T.E.	1	M	adult	Whole animal (Stuffed)	1859	885		GR	Africa	Coordinates according to: http://bl.ocks.org/rdmpage/raw/9951904/	2.31186	15.7562	4243522	Shogolev Igor	urn:lsid:catalogueoflife.org:taxon:eb8aa495-18fd-11e5-9774-bc764e0806fb:col20150730	Melierax canorus	Animalia	Chordata	Aves	Accipitriformes	Accipitridae	Melierax	canorus	(Thunberg, 1799)	ICZN	Melierax canorus Rislachi 1799
ZMUA	AVSE	ZMUA_Aves	ZMUA	PreservedSpecimen	1598-1193	GR-ZMUA_Aves-1598-1193	E.T.T.E.	1			Whole animal (Stuffed)	1859	1598		GR	Africa	Coordinates according to: http://bl.ocks.org/rdmpage/raw/9951904/	2.31186	15.7562	4243522	Shogolev Igor	urn:lsid:catalogueoflife.org:taxon:2459baef-18fe-11e5-9774-bc764e0806fb:col20150730	Merops persicus chrysocercus	Animalia	Chordata	Aves	Coraciiformes	Meropidae	Merops	persicus	Cabanis & Heine, 1860	ICZN	Merops persicus chrysocercus Pallas, 1773
ZMUA	AVSE	ZMUA_Aves	ZMUA	PreservedSpecimen	1426-1021	GR-ZMUA_Aves-1426-1021	E.T.T.E.	1			Whole animal (Stuffed)	1859	1426		GR	Africa	Coordinates according to: http://bl.ocks.org/rdmpage/raw/9951904/	2.31186	15.7562	4243522	Shogolev Igor	urn:lsid:catalogueoflife.org:taxon:24599d2a-18fe-11e5-9774-bc764e0806fb:col20150730	Merops nubicus nubicus	Animalia	Chordata	Aves	Coraciiformes	Meropidae	Merops	nubicus	Gmelin, 1788	ICZN	Merops nubicus nubicus Gmelin, 1788
ZMUA	AVSE	ZMUA_Aves	ZMUA	PreservedSpecimen	1237-832	GR-ZMUA_Aves-1237-832	E.T.T.E.	1	M	adult	Whole animal (Stuffed)	1859	1237		GR	Abyssinia	Coordinates according to: http://bl.ocks.org/rdmpage/raw/9951904/	10.6657	39.783	664046	Shogolev Igor	urn:lsid:catalogueoflife.org:taxon:ed34da40-18fd-11e5-9774-bc764e0806fb:col20150623	Campethera nubica	Animalia	Chordata	Aves	Piciformes	Picidae	Campethera	nubica	(Boddaert, 1783)	ICZN	Campethera nubica
ZMUA	AVSE	ZMUA_Aves	ZMUA	PreservedSpecimen	1207-802	GR-ZMUA_Aves-1207-802	E.T.T.E.	1			Whole animal (Stuffed)	1859	1207		GR	Abyssinia	Coordinates according to: http://bl.ocks.org/rdmpage/raw/9951904/	10.6657	39.783	664046	Shogolev Igor	urn:lsid:catalogueoflife.org:taxon:eded9933-18fd-11e5-9774-bc764e0806fb:col20150623	Lybius guifsobalito	Animalia	Chordata	Aves	Piciformes	Ramphastidae	Lybius	guifsobalito	Hermann, 1783	ICZN	Lybius guifsobalito
ZMUA	AVSE	ZMUA_Aves	ZMUA	PreservedSpecimen	743-338	GR-ZMUA_Aves-743-338	E.T.T.E.	1			Whole animal (Stuffed)	1859	743	South Africa	GR	S. Africa (Port Natal)	Coordinates according to: http://bl.ocks.org/rdmpage/raw/9951904/	-29.8633	31.0302	4096	Shogolev Igor	urn:lsid:catalogueoflife.org:taxon:f5a36c0d-18fd-11e5-9774-bc764e0806fb:col20150623	Amaurornis flavirostra	Animalia	Chordata	Aves	Gruiformes	Rallidae	Amaurornis	flavirostra	(Swainson, 1837)	ICZN	Amaurornis flavirostris Swainson 1837
ZMUA	AVSE	ZMUA_Aves	ZMUA	PreservedSpecimen	1077-672	GR-ZMUA_Aves-1077-672	E.T.T.E.	1		adult	Whole animal (Stuffed)	1859	1077	Brazil	GR	Brazil	Coordinates according to: http://bl.ocks.org/rdmpage/raw/9951904/	-12.607	-54.423	2281819	Shogolev Igor	urn:lsid:catalogueoflife.org:taxon:ee1588fc-18fd-11e5-9774-bc764e0806fb:col20150623	Glaucidium brasilianum	Animalia	Chordata	Aves	Strigiformes	Strigidae	Glaucidium	brasilianum	(Gmelin, 1788)	ICZN	Glaucidium brasilianum J. F. Gmelin, 1788
ZMUA	AVSE	ZMUA_Aves	ZMUA	PreservedSpecimen	1573-1168	GR-ZMUA_Aves-1573-1168	E.T.T.E.	1			Whole animal (Stuffed)	1859	1573	Brazil	GR	Brazil	Coordinates according to: http://bl.ocks.org/rdmpage/raw/9951904/	-12.607	-54.423	2281819	Shogolev Igor	urn:lsid:catalogueoflife.org:taxon:ee1588fc-18fd-11e5-9774-bc764e0806fb:col20150623	Glaucidium brasilianum	Animalia	Chordata	Aves	Strigiformes	Strigidae	Glaucidium	brasilianum	(Gmelin, 1788)	ICZN	Glaucidium brasilianum J. F. Gmelin, 1788
ZMUA	AVSE	ZMUA_Aves	ZMUA	PreservedSpecimen	2811-2406	GR-ZMUA_Aves-2811-2406	E.T.T.E.	1	F	adult	Whole animal (Stuffed)	1859	2811	Greece	GR	Attica	Coordinates according to: http://bl.ocks.org/rdmpage/raw/9951904/	37.9789	23.6696	50004	Shogolev Igor	urn:lsid:catalogueoflife.org:taxon:e7d42928-18fd-11e5-9774-bc764e0806fb:col20150807	Sylvia atricapilla	Animalia	Chordata	Aves	Passeriformes	Sylviidae	Sylvia	atricapilla	(Linnaeus, 1758)	ICZN	Sylvia atricapilla (L.)
ZMUA	AVSE	ZMUA_Aves	ZMUA	PreservedSpecimen	1711-1306	GR-ZMUA_Aves-1711-1306	E.T.T.E.	1			Whole animal (Stuffed)	1859	1711	Mexico	GR	Mexico	Coordinates according to: http://bl.ocks.org/rdmpage/raw/9951904/	23.9501	-102.947	1738309	Shogolev Igor	urn:lsid:catalogueoflife.org:taxon:288f644b-18fe-11e5-9774-bc764e0806fb:col20150807	Tangara velia cyanomelas	Animalia	Chordata	Aves	Passeriformes	Thraupidae	Tangara	velia	(Wied-Neuwied, 1830)	ICZN	Tangara velia cyanomelaena
ZMUA	AVSE	ZMUA_Aves	ZMUA	PreservedSpecimen	2241-1836	GR-ZMUA_Aves-2241-1836	E.T.T.E.	1			Whole animal (Stuffed)	1859	2241	India	GR	Marad	Coordinates according to: http://bl.ocks.org/rdmpage/raw/9951904/	21.6819	70.3738	262147	Shogolev Igor	urn:lsid:catalogueoflife.org:taxon:e823188b-18fd-11e5-9774-bc764e0806fb:col20150623	Laniarius erythrogaster	Animalia	Chordata	Aves	Passeriformes	Malaconotidae	Laniarius	erythrogaster	(Cretzschmar, 1829)	ICZN	Laniarius erythrogaster
ZMUA	AVSE	ZMUA_Aves	ZMUA	PreservedSpecimen	2405-2000	GR-ZMUA_Aves-2405-2000	E.T.T.E.	1			Whole animal (Stuffed)	1859	2405		GR	Abyssinia	Coordinates according to: http://bl.ocks.org/rdmpage/raw/9951904/	10.6657	39.783	664046	Shogolev Igor	urn:lsid:catalogueoflife.org:taxon:e7d4c304-18fd-11e5-9774-bc764e0806fb:col20150807	Quelea quelea	Animalia	Chordata	Aves	Passeriformes	Ploceidae	Quelea	quelea	(Linnaeus, 1758)	ICZN	Quelea guelea
ZMUA	AVSE	ZMUA_Aves	ZMUA	PreservedSpecimen	2406-2001	GR-ZMUA_Aves-2406-2001	E.T.T.E.	1			Whole animal (Stuffed)	1859	2406		GR	Abyssinia	Coordinates according to: http://bl.ocks.org/rdmpage/raw/9951904/	10.6657	39.783	664046	Shogolev Igor	urn:lsid:catalogueoflife.org:taxon:e7d4c304-18fd-11e5-9774-bc764e0806fb:col20150807	Quelea quelea	Animalia	Chordata	Aves	Passeriformes	Ploceidae	Quelea	quelea	(Linnaeus, 1758)	ICZN	Quelea guelea
ZMUA	AVSE	ZMUA_Aves	ZMUA	PreservedSpecimen	2408-2003	GR-ZMUA_Aves-2408-2003	E.T.T.E.	1			Whole animal (Stuffed)	1859	2408		GR	Abyssinia	Coordinates according to: http://bl.ocks.org/rdmpage/raw/9951904/	10.6657	39.783	664046	Shogolev Igor	urn:lsid:catalogueoflife.org:taxon:e7d4c304-18fd-11e5-9774-bc764e0806fb:col20150807	Quelea quelea	Animalia	Chordata	Aves	Passeriformes	Ploceidae	Quelea	quelea	(Linnaeus, 1758)	ICZN	Quelea guelea
ZMUA	AVSE	ZMUA_Aves	ZMUA	PreservedSpecimen	1139-734	GR-ZMUA_Aves-1139-734	E.T.T.E.	1			Whole animal (Stuffed)	1859	1139		GR	Africa	Coordinates according to: http://bl.ocks.org/rdmpage/raw/9951904/	2.31186	15.7562	4243522	Shogolev Igor	urn:lsid:catalogueoflife.org:taxon:ee20f478-18fd-11e5-9774-bc764e0806fb:col20150807	Urocolius macrourus	Animalia	Chordata	Aves	Coliiformes	Coliidae	Urocolius	macrourus	(Linnaeus, 1766)	ICZN	Urocolius macrourus L., 1766
ZMUA	AVSE	ZMUA_Aves	ZMUA	PreservedSpecimen	1925-1520	GR-ZMUA_Aves-1925-1520	E.T.T.E.	1			Whole animal (Stuffed)	1859	1925		GR	Africa	Coordinates according to: http://bl.ocks.org/rdmpage/raw/9951904/	2.31186	15.7562	4243522	Shogolev Igor	urn:lsid:catalogueoflife.org:taxon:e7bb80a1-18fd-11e5-9774-bc764e0806fb:col20150807	Vidua purpurascens	Animalia	Chordata	Aves	Passeriformes	Viduidae	Vidua	purpurascens	(Reichenow, 1883)	ICZN	Vidua purpurascens
ZMUA	AVSE	ZMUA_Aves	ZMUA	PreservedSpecimen	2012-1607	GR-ZMUA_Aves-2012-1607	E.T.T.E.	1			Whole animal (Stuffed)	1859	2012		GR	Africa	Coordinates according to: http://bl.ocks.org/rdmpage/raw/9951904/	2.31186	15.7562	4243522	Shogolev Igor	urn:lsid:catalogueoflife.org:taxon:e7bc14aa-18fd-11e5-9774-bc764e0806fb:col20150807	Vidua chalybeata	Animalia	Chordata	Aves	Passeriformes	Viduidae	Vidua	chalybeata	(Statius Muller, 1776)	ICZN	Hypochera chalybeata / Vidua chalybeata
ZMUA	AVSE	ZMUA_Aves	ZMUA	PreservedSpecimen	1927-1522	GR-ZMUA_Aves-1927-1522	E.T.T.E.	1			Whole animal (Stuffed)	1859	1927		GR	Africa	Coordinates according to: http://bl.ocks.org/rdmpage/raw/9951904/	2.31186	15.7562	4243522	Shogolev Igor	urn:lsid:catalogueoflife.org:taxon:e7bb80a1-18fd-11e5-9774-bc764e0806fb:col20150807	Vidua purpurascens	Animalia	Chordata	Aves	Passeriformes	Viduidae	Vidua	purpurascens	(Reichenow, 1883)	ICZN	Vidua purpurascens
ZMUA	AVSE	ZMUA_Aves	ZMUA	PreservedSpecimen	1417-1012	GR-ZMUA_Aves-1417-1012	E.T.T.E.	1			Whole animal (Stuffed)	1859	1417	Colombia	GR	Colombia	Coordinates according to: http://bl.ocks.org/rdmpage/raw/9951904/	3.75998	-72.6178	947417	Shogolev Igor	urn:lsid:catalogueoflife.org:taxon:e82543a9-18fd-11e5-9774-bc764e0806fb:col20150623	Diglossa duidae	Animalia	Chordata	Aves	Passeriformes	Thraupidae	Diglossa	duidae	Chapman, 1929	ICZN	Diglossa duidae
ZMUA	AVSE	ZMUA_Aves	ZMUA	PreservedSpecimen	1564-1159	GR-ZMUA_Aves-1564-1159	E.T.T.E.	1	M	adult	Whole animal (Stuffed)	1859	1564	Austria	GR	Austria (Carinthia)	Coordinates according to: http://bl.ocks.org/rdmpage/raw/9951904/	46.7876	13.6246	101685	Shogolev Igor	urn:lsid:catalogueoflife.org:taxon:e81d4a2b-18fd-11e5-9774-bc764e0806fb:col20150623	Bombycilla garrulus	Animalia	Chordata	Aves	Passeriformes	Bombycillidae	Bombycilla	garrulus	(Linnaeus, 1758)	ICZN	Bombycilla garrulus (L.)
ZMUA	AVSE	ZMUA_Aves	ZMUA	PreservedSpecimen	1618-1213	GR-ZMUA_Aves-1618-1213	E.T.T.E.	1			Whole animal (Stuffed)	1859	1618	Indonesia	GR	Java	Coordinates according to: http://bl.ocks.org/rdmpage/raw/9951904/	-7.46988	110.004	526572	Shogolev Igor	urn:lsid:catalogueoflife.org:taxon:e7b0b33f-18fd-11e5-9774-bc764e0806fb:col20150623	Eurylaimus javanicus	Animalia	Chordata	Aves	Passeriformes	Eurylaimidae	Eurylaimus	javanicus	Horsfield, 1821	ICZN	Eurylaimus javanicus
ZMUA	AVSE	ZMUA_Aves	ZMUA	PreservedSpecimen	2722-2317	GR-ZMUA_Aves-2722-2317	E.T.T.E.	1	M	adult	Whole animal (Stuffed)	1859	2722	Greece	GR	Attica	Coordinates according to: http://bl.ocks.org/rdmpage/raw/9951904/	37.9789	23.6696	50004	Shogolev Igor	urn:lsid:catalogueoflife.org:taxon:ee205be3-18fd-11e5-9774-bc764e0806fb:col20150623	Himantopus himantopus	Animalia	Chordata	Aves	Charadriiformes	Recurvirostridae	Himantopus	himantopus	(Linnaeus, 1758)	ICZN	Himantopus himantopus (L.)
ZMUA	AVSE	ZMUA_Aves	ZMUA	PreservedSpecimen	1300-895	GR-ZMUA_Aves-1300-895	E.T.T.E.	1			Whole animal (Stuffed)	1859	1300	Brazil	GR	Brazil	Coordinates according to: http://bl.ocks.org/rdmpage/raw/9951904/	-12.607	-54.423	2281819	Shogolev Igor	urn:lsid:catalogueoflife.org:taxon:fb6f52ef-18fd-11e5-9774-bc764e0806fb:col20150807	Touit surdus	Animalia	Chordata	Aves	Psittaciformes	Psittacidae	Touit	surdus	(Kuhl, 1820)	ICZN	Touit surda
ZMUA	AVSE	ZMUA_Aves	ZMUA	PreservedSpecimen	1816-1411	GR-ZMUA_Aves-1816-1411	E.T.T.E.	1			Whole animal (Stuffed)	1859	1816		GR	W. Africa	Coordinates according to: http://en.wikipedia.org/wiki/West_Africa	20.9625	0.796808	2055229	Shogolev Igor	urn:lsid:catalogueoflife.org:taxon:e835d604-18fd-11e5-9774-bc764e0806fb:col20150623	Cinnyris pulchellus	Animalia	Chordata	Aves	Passeriformes	Nectariniidae	Cinnyris	pulchellus	(Linnaeus, 1766)	ICZN	Nectarinia pulchella
ZMUA	AVSE	ZMUA_Aves	ZMUA	PreservedSpecimen	1817-1412	GR-ZMUA_Aves-1817-1412	E.T.T.E.	1			Whole animal (Stuffed)	1859	1817		GR	W. Africa	Coordinates according to: http://en.wikipedia.org/wiki/West_Africa	20.9625	0.796808	2055229	Shogolev Igor	urn:lsid:catalogueoflife.org:taxon:e835d604-18fd-11e5-9774-bc764e0806fb:col20150623	Cinnyris pulchellus	Animalia	Chordata	Aves	Passeriformes	Nectariniidae	Cinnyris	pulchellus	(Linnaeus, 1766)	ICZN	Nectarinia pulchella
ZMUA	AVSE	ZMUA_Aves	ZMUA	PreservedSpecimen	1836-1431	GR-ZMUA_Aves-1836-1431	E.T.T.E.	1			Whole animal (Stuffed)	1859	1836		GR	West Africa	Coordinates according to: http://en.wikipedia.org/wiki/West_Africa	20.9625	0.796808	2055229	Shogolev Igor	urn:lsid:catalogueoflife.org:taxon:e835d604-18fd-11e5-9774-bc764e0806fb:col20150623	Cinnyris pulchellus	Animalia	Chordata	Aves	Passeriformes	Nectariniidae	Cinnyris	pulchellus	(Linnaeus, 1766)	ICZN	Nectarinia pulchella
ZMUA	AVSE	ZMUA_Aves	ZMUA	PreservedSpecimen	1849-1444	GR-ZMUA_Aves-1849-1444	E.T.T.E.	1			Whole animal (Stuffed)	1859	1849		GR	W. Africa	Coordinates according to: http://en.wikipedia.org/wiki/West_Africa	20.9625	0.796808	2055229	Shogolev Igor	urn:lsid:catalogueoflife.org:taxon:e835d604-18fd-11e5-9774-bc764e0806fb:col20150623	Cinnyris pulchellus	Animalia	Chordata	Aves	Passeriformes	Nectariniidae	Cinnyris	pulchellus	(Linnaeus, 1766)	ICZN	Nectarinia pulchella
ZMUA	AVSE	ZMUA_Aves	ZMUA	PreservedSpecimen	840-435	GR-ZMUA_Aves-840-435	E.T.T.E.	1			Whole animal (Stuffed)	1859	840		GR	Egypt	Coordinates according to: http://upload.wikimedia.org/wikipedia/commons/e/ec/Egypt_under_Muhammad_Ali_Dynasty_map_en.png	21.7953	30.2587	1188633	Shogolev Igor	urn:lsid:catalogueoflife.org:taxon:e867b770-18fd-11e5-9774-bc764e0806fb:col20150623	Bubulcus ibis	Animalia	Chordata	Aves	Pelecaniformes	Ardeidae	Bubulcus	ibis	(Linnaeus, 1758)	ICZN	Bubulcus ibis (L.)
ZMUA	AVSE	ZMUA_Aves	ZMUA	PreservedSpecimen	1604-1199	GR-ZMUA_Aves-1604-1199	E.T.T.E.	1			Whole animal (Stuffed)	1859	1604		GR	India	Coordinates according to: http://www.davidrumsey.com/luna/servlet/detail/RUMSEY~8~1~209897~5003705:India-?showTip=false&showTipAdvancedSearch=false&title=Search+Results%3A+List_No+equal+to+%271550.100%27&thumbnailViewUrlKey=link.view.search.url&helpUrl=http%3A%2F%2Fdoc.lunaimaging.com%2Fdisplay%2FV71D%2FLUNA%2BViewer%23LUNAViewer-LUNAViewer&fullTextSearchChecked=&advancedSearchUrl=http%3A%2F%2Fdo…	23.7268	83.8993	2005716	Shogolev Igor	urn:lsid:catalogueoflife.org:taxon:f0c514da-18fd-11e5-9774-bc764e0806fb:col20150807	Nyctyornis athertoni	Animalia	Chordata	Aves	Coraciiformes	Meropidae	Nyctyornis	athertoni	(Jardine & Selby, 1828)	ICZN	Nyctiornis athertoni Jardine & Selby 1830
ZMUA	AVSE	ZMUA_Aves	ZMUA	PreservedSpecimen	1223-818	GR-ZMUA_Aves-1223-818	E.T.T.E.	1			Whole animal (Stuffed)	1859	1223		GR	India	Coordinates according to: http://www.davidrumsey.com/luna/servlet/detail/RUMSEY~8~1~209897~5003705:India-?showTip=false&showTipAdvancedSearch=false&title=Search+Results%3A+List_No+equal+to+%271550.100%27&thumbnailViewUrlKey=link.view.search.url&helpUrl=http%3A%2F%2Fdoc.lunaimaging.com%2Fdisplay%2FV71D%2FLUNA%2BViewer%23LUNAViewer-LUNAViewer&fullTextSearchChecked=&advancedSearchUrl=http%3A%2F%2Fdo…	23.7268	83.8993	2005716	Shogolev Igor	urn:lsid:catalogueoflife.org:taxon:edee1a34-18fd-11e5-9774-bc764e0806fb:col20150730	Celeus brachyurus	Animalia	Chordata	Aves	Piciformes	Picidae	Celeus	brachyurus	(Vieillot, 1818)	ICZN	Micropternus brachyurus
ZMUA	AVSE	ZMUA_Aves	ZMUA	PreservedSpecimen	1537-1132	GR-ZMUA_Aves-1537-1132	E.T.T.E.	1			Whole animal (Stuffed)	1859	1537		GR	India	Coordinates according to: http://www.davidrumsey.com/luna/servlet/detail/RUMSEY~8~1~209897~5003705:India-?showTip=false&showTipAdvancedSearch=false&title=Search+Results%3A+List_No+equal+to+%271550.100%27&thumbnailViewUrlKey=link.view.search.url&helpUrl=http%3A%2F%2Fdoc.lunaimaging.com%2Fdisplay%2FV71D%2FLUNA%2BViewer%23LUNAViewer-LUNAViewer&fullTextSearchChecked=&advancedSearchUrl=http%3A%2F%2Fdo…	23.7268	83.8993	2005716	Shogolev Igor	urn:lsid:catalogueoflife.org:taxon:e7bf9b37-18fd-11e5-9774-bc764e0806fb:col20150807	Pitta moluccensis	Animalia	Chordata	Aves	Passeriformes	Pittidae	Pitta	moluccensis	(Statius Muller, 1776)	ICZN	Pitta moluccensis
ZMUA	AVSE	ZMUA_Aves	ZMUA	PreservedSpecimen	1023-618	GR-ZMUA_Aves-1023-618	E.T.T.E.	1	F	adult	Whole animal (Stuffed)	1859	1023		GR	Lapland	Coordinates according to: http://www.getty.edu/vow/TGNFullDisplay?find=lapland&place=&nation=&prev_page=1&english=Y&subjectid=7010028	68.2383	25.2876	390067	Shogolev Igor	urn:lsid:catalogueoflife.org:taxon:f3aba72c-ac8e-11e3-805d-020044200006:col20150401	Surnia ulula	Animalia	Chordata	Aves	Strigiformes	Strigidae	Surnia	ulula	(Linnaeus, 1758)	ICZN	Surniia ulula (L.)
ZMUA	AVSE	ZMUA_Aves	ZMUA	PreservedSpecimen	1254-849	GR-ZMUA_Aves-1254-849	E.T.T.E.	1			Whole animal (Stuffed)	1859	1254		GR	Senegal	Coordinates for Senegambia (http://www.davidrumsey.com/luna/servlet/detail/RUMSEY~8~1~36486~1200848:Africa-?showTip=false&showTipAdvancedSearch=false&title=Search+Results%3A+List_No+equal+to+%274557.074%27&thumbnailViewUrlKey=link.view.search.url&helpUrl=http%3A%2F%2Fdoc.lunaimaging.com%2Fdisplay%2FV71D%2FLUNA%2BViewer%23LUNAViewer-LUNAViewer&fullTextSearchChecked=&advancedSearchUrl=http%3A%2F%2F…	13.7916	-14.0596	426910	Shogolev Igor	urn:lsid:catalogueoflife.org:taxon:f6bd78d7-18fd-11e5-9774-bc764e0806fb:col20150623	Crinifer zonurus	Animalia	Chordata	Aves	Musophagiformes	Musophagidae	Crinifer	zonurus	(Rüppell, 1835)	ICZN	Crinifer zonurus Ruppell 1835
ZMUA	AVSE	ZMUA_Aves	ZMUA	PreservedSpecimen	1352-947	GR-ZMUA_Aves-1352-947	E.T.T.E.	1			Whole animal (Stuffed)	1859	1352		GR	Senegal	Coordinates for Senegambia (http://www.davidrumsey.com/luna/servlet/detail/RUMSEY~8~1~36486~1200848:Africa-?showTip=false&showTipAdvancedSearch=false&title=Search+Results%3A+List_No+equal+to+%274557.074%27&thumbnailViewUrlKey=link.view.search.url&helpUrl=http%3A%2F%2Fdoc.lunaimaging.com%2Fdisplay%2FV71D%2FLUNA%2BViewer%23LUNAViewer-LUNAViewer&fullTextSearchChecked=&advancedSearchUrl=http%3A%2F%2F…	13.7916	-14.0596	426910	Shogolev Igor	urn:lsid:catalogueoflife.org:taxon:f6bd78d7-18fd-11e5-9774-bc764e0806fb:col20150623	Crinifer zonurus	Animalia	Chordata	Aves	Musophagiformes	Musophagidae	Crinifer	zonurus	(Rüppell, 1835)	ICZN	Crinifer zonurus Ruppell 1835
ZMUA	AVSE	ZMUA_Aves	ZMUA	PreservedSpecimen	2168-1763	GR-ZMUA_Aves-2168-1763	E.T.T.E.	1			Whole animal (Stuffed)	1859	2168		GR	Africa Mer.	Coordinates for Southern Africa.	-1.42117	16.7699	4126464	Shogolev Igor	urn:lsid:catalogueoflife.org:taxon:e7ba909d-18fd-11e5-9774-bc764e0806fb:col20150623	Estrilda astrild	Animalia	Chordata	Aves	Passeriformes	Estrildidae	Estrilda	astrild	(Linnaeus, 1758)	ICZN	Estrilda astrild
ZMUA	AVSE	ZMUA_Aves	ZMUA	PreservedSpecimen	737-332	GR-ZMUA_Aves-737-332	E.T.T.E.	1		adult	Whole animal (Stuffed)	1859	737		GR	S. Africa	S. symbol may mean either South or Southern. Since it is not clarified, Southern Africa is selected. Southern Africa according to: https://books.google.gr/books?id=-Uw5AQAAIAAJ&printsec=frontcover&dq=Southern+Africa:+A+Geography+and+Natural+History+of+the+Country,+Colonies,+and+Inhabitants+from+the+Cape+of+Good+Hope+to+Angola.&hl=en&sa=X&ved=0CB8Q6AEwAGoVChMI56v3rb7TxwIVigYsCh09Mwe9#v=onepage&q=S…	-1.28817	17.0059	4023989	Shogolev Igor	urn:lsid:catalogueoflife.org:taxon:f5a36c0d-18fd-11e5-9774-bc764e0806fb:col20150623	Amaurornis flavirostra	Animalia	Chordata	Aves	Gruiformes	Rallidae	Amaurornis	flavirostra	(Swainson, 1837)	ICZN	Amaurornis flavirostris Swainson 1837
ZMUA	AVSE	ZMUA_Aves	ZMUA	PreservedSpecimen	2163-1758	GR-ZMUA_Aves-2163-1758	E.T.T.E.	1			Whole animal (Stuffed)	1859	2163		GR	S. Africa	S. symbol may mean either South or Southern. Since it is not clarified, Southern Africa is selected. Southern Africa according to: https://books.google.gr/books?id=-Uw5AQAAIAAJ&printsec=frontcover&dq=Southern+Africa:+A+Geography+and+Natural+History+of+the+Country,+Colonies,+and+Inhabitants+from+the+Cape+of+Good+Hope+to+Angola.&hl=en&sa=X&ved=0CB8Q6AEwAGoVChMI56v3rb7TxwIVigYsCh09Mwe9#v=onepage&q=S…	-1.28817	17.0059	4023989	Shogolev Igor	urn:lsid:catalogueoflife.org:taxon:e7ba909d-18fd-11e5-9774-bc764e0806fb:col20150623	Estrilda astrild	Animalia	Chordata	Aves	Passeriformes	Estrildidae	Estrilda	astrild	(Linnaeus, 1758)	ICZN	Estrilda astrild
ZMUA	AVSE	ZMUA_Aves	ZMUA	PreservedSpecimen	1374-969	GR-ZMUA_Aves-1374-969	E.T.T.E.	1			Whole animal (Stuffed)	1859	1374		GR	Tropical Africa	Tropical Africa coordinates were created based on the borders of the tropical climate in Africa (sensu lato). Dense green areas apparent from the satelite were the basic guide.	3.36524	17.1625	3868846	Shogolev Igor	urn:lsid:catalogueoflife.org:taxon:ee201298-18fd-11e5-9774-bc764e0806fb:col20150623	Centropus senegalensis	Animalia	Chordata	Aves	Cuculiformes	Cuculidae	Centropus	senegalensis	(Linnaeus, 1766)	ICZN	Centropus senegalensis L. 1766
ZMUA	AVSE	ZMUA_Aves	ZMUA	PreservedSpecimen	1975-1570	GR-ZMUA_Aves-1975-1570	E.T.T.E.	1			Whole animal (Stuffed)	1859	1975		GR						Shogolev Igor	urn:lsid:catalogueoflife.org:taxon:e6e4ce1b-18fd-11e5-9774-bc764e0806fb:col20150623	Arremon flavirostris	Animalia	Chordata	Aves	Passeriformes	Emberizidae	Arremon	flavirostris	Swainson, 1838	ICZN	Arremon flavirostrus
ZMUA	AVSE	ZMUA_Aves	ZMUA	PreservedSpecimen	685-280	GR-ZMUA_Aves-685-280	E.T.T.E.	1			Whole animal (Stuffed)	1859	685		GR						Shogolev Igor	urn:lsid:catalogueoflife.org:taxon:fbbf0a8c-18fd-11e5-9774-bc764e0806fb:col20150623	Charadrius dubius	Animalia	Chordata	Aves	Charadriiformes	Charadriidae	Charadrius	dubius	Scopoli, 1786	ICZN	Charadrius dubius Scop.
ZMUA	AVSE	ZMUA_Aves	ZMUA	PreservedSpecimen	1539-1134	GR-ZMUA_Aves-1539-1134	E.T.T.E.	1			Whole animal (Stuffed)	1859	1539		GR						Shogolev Igor	urn:lsid:catalogueoflife.org:taxon:e7c8414c-18fd-11e5-9774-bc764e0806fb:col20150807	Terpsiphone viridis	Animalia	Chordata	Aves	Passeriformes	Monarchidae	Terpsiphone	viridis	(Statius Muller, 1776)	ICZN	Terpsiphone viridis
ZMUA	AVSE	ZMUA_Aves	ZMUA	PreservedSpecimen	1205-800	GR-ZMUA_Aves-1205-800	E.T.T.E.	1			Whole animal (Stuffed)	1859	1205		GR						Shogolev Igor	urn:lsid:catalogueoflife.org:taxon:eded9e99-18fd-11e5-9774-bc764e0806fb:col20150623	Lybius vieilloti	Animalia	Chordata	Aves	Piciformes	Ramphastidae	Lybius	vieilloti	(Leach, 1815)	ICZN	Lybius vieilloti
ZMUA	AVSE	ZMUA_Aves	ZMUA	PreservedSpecimen	1650-1245	GR-ZMUA_Aves-1650-1245	E.T.T.E.	1	F	adult	Whole animal (Stuffed)	1859	1650		GR						Shogolev Igor	urn:lsid:catalogueoflife.org:taxon:f73cdc16-18fd-11e5-9774-bc764e0806fb:col20150623	Chrysolampis mosquitus	Animalia	Chordata	Aves	Apodiformes	Trochilidae	Chrysolampis	mosquitus	(Linnaeus, 1758)	ICZN	Chrysolampis mosquitus L. 1758
ZMUA	AVSE	ZMUA_Aves	ZMUA	PreservedSpecimen	1563-1158	GR-ZMUA_Aves-1563-1158	E.T.T.E.	1			Whole animal (Stuffed)	1859	1563		GR						Shogolev Igor	urn:lsid:catalogueoflife.org:taxon:fbbb3615-18fd-11e5-9774-bc764e0806fb:col20150807	Turtur abyssinicus	Animalia	Chordata	Aves	Columbiformes	Columbidae	Turtur	abyssinicus	(Sharpe, 1902)	ICZN	Turtur abyssinicus Sharpe 1902
ZMUA	AVSE	ZMUA_Aves	ZMUA	PreservedSpecimen	2051-1646	GR-ZMUA_Aves-2051-1646	E.T.T.E.	1			Whole animal (Stuffed)	1859	2051		GR						Shogolev Igor	urn:lsid:catalogueoflife.org:taxon:e7db7ece-18fd-11e5-9774-bc764e0806fb:col20150807	Ptilostomus afer	Animalia	Chordata	Aves	Passeriformes	Corvidae	Ptilostomus	afer	(Linnaeus, 1766)	ICZN	Ptilostomus ater
ZMUA	AVSE	ZMUA_Aves	ZMUA	PreservedSpecimen	2180-1775	GR-ZMUA_Aves-2180-1775	E.T.T.E.	1			Whole animal (Stuffed)	1859	2180		GR						Shogolev Igor	urn:lsid:catalogueoflife.org:taxon:e7ba909d-18fd-11e5-9774-bc764e0806fb:col20150623	Estrilda astrild	Animalia	Chordata	Aves	Passeriformes	Estrildidae	Estrilda	astrild	(Linnaeus, 1758)	ICZN	Estrilda astrild
ZMUA	AVSE	ZMUA_Aves	ZMUA	PreservedSpecimen	1347-942	GR-ZMUA_Aves-1347-942	E.T.T.E.	1			Whole animal (Stuffed)	1859	1347		GR						Shogolev Igor	urn:lsid:catalogueoflife.org:taxon:e8234121-18fd-11e5-9774-bc764e0806fb:col20150623	Lanius minor	Animalia	Chordata	Aves	Passeriformes	Laniidae	Lanius	minor	Gmelin, 1788	ICZN	Lanius minor Gm.
ZMUA	AVSE	ZMUA_Aves	ZMUA	PreservedSpecimen	2353-1948	GR-ZMUA_Aves-2353-1948	E.T.T.E.	1			Whole animal (Stuffed)	1859	2353		GR						Shogolev Igor	urn:lsid:catalogueoflife.org:taxon:e820b7b6-18fd-11e5-9774-bc764e0806fb:col20150623	Garrulax striatus	Animalia	Chordata	Aves	Passeriformes	Leiothrichidae	Garrulax	striatus	(Vigors, 1831)	ICZN	Garrulax striatus
ZMUA	AVSE	ZMUA_Aves	ZMUA	PreservedSpecimen	2135-1730	GR-ZMUA_Aves-2135-1730	E.T.T.E.	1			Whole animal (Stuffed)	1859	2135		GR						Shogolev Igor	urn:lsid:catalogueoflife.org:taxon:e7d86ea6-18fd-11e5-9774-bc764e0806fb:col20150623	Empidornis semipartitus	Animalia	Chordata	Aves	Passeriformes	Muscicapidae	Empidornis	semipartitus	(Rüppell, 1840)	ICZN	Empidornis semipartitus
ZMUA	AVSE	ZMUA_Aves	ZMUA	PreservedSpecimen	1544-1139	GR-ZMUA_Aves-1544-1139	E.T.T.E.	1			Whole animal (Stuffed)	1859	1544		GR						Shogolev Igor	urn:lsid:catalogueoflife.org:taxon:eded8bdd-18fd-11e5-9774-bc764e0806fb:col20150807	Trachyphonus darnaudii	Animalia	Chordata	Aves	Piciformes	Ramphastidae	Trachyphonus	darnaudii	(Prevost & Des Murs, 1847)	ICZN	Tachyphonus damaudii
ZMUA	AVSE	ZMUA_Aves	ZMUA	PreservedSpecimen	2329-1924	GR-ZMUA_Aves-2329-1924	E.T.T.E.	1			Whole animal (Stuffed)	1859	2329		GR						Shogolev Igor	urn:lsid:catalogueoflife.org:taxon:e8217c3a-18fd-11e5-9774-bc764e0806fb:col20150623	Hemithraupis flavicollis	Animalia	Chordata	Aves	Passeriformes	Thraupidae	Hemithraupis	flavicollis	(Vieillot, 1818)	ICZN	Hemithraupis flavicollis
ZMUA	AVSE	ZMUA_Aves	ZMUA	PreservedSpecimen	2390-1985	GR-ZMUA_Aves-2390-1985	E.T.T.E.	1			Whole animal (Stuffed)	1859	2390		GR						Shogolev Igor	urn:lsid:catalogueoflife.org:taxon:e7b279f4-18fd-11e5-9774-bc764e0806fb:col20150807	Pachyramphus surinamus	Animalia	Chordata	Aves	Passeriformes	Cotingidae	Pachyramphus	surinamus	(Linnaeus, 1766)	ICZN	Pachyramphus surinamus
ZMUA	AVSE	ZMUA_Aves	ZMUA	PreservedSpecimen	1540-1135	GR-ZMUA_Aves-1540-1135	E.T.T.E.	1			Whole animal (Stuffed)	1859	1540		GR						Shogolev Igor	urn:lsid:catalogueoflife.org:taxon:e7c8414c-18fd-11e5-9774-bc764e0806fb:col20150807	Terpsiphone viridis	Animalia	Chordata	Aves	Passeriformes	Monarchidae	Terpsiphone	viridis	(Statius Muller, 1776)	ICZN	Terpsiphone viridis
ZMUA	AVSE	ZMUA_Aves	ZMUA	PreservedSpecimen	2342-1937	GR-ZMUA_Aves-2342-1937	E.T.T.E.	1			Whole animal (Stuffed)	1859	2342		GR						Shogolev Igor	urn:lsid:catalogueoflife.org:taxon:e7bad092-18fd-11e5-9774-bc764e0806fb:col20150807	Riparia paludicola	Animalia	Chordata	Aves	Passeriformes	Hirundinidae	Riparia	paludicola	(Vieillot, 1817)	ICZN	Riparia paludicola
ZMUA	AVSE	ZMUA_Aves	ZMUA	PreservedSpecimen	2343-1938	GR-ZMUA_Aves-2343-1938	E.T.T.E.	1			Whole animal (Stuffed)	1859	2343		GR						Shogolev Igor	urn:lsid:catalogueoflife.org:taxon:e6f1ecb0-18fd-11e5-9774-bc764e0806fb:col20150623	Aethopyga ignicauda	Animalia	Chordata	Aves	Passeriformes	Nectariniidae	Aethopyga	ignicauda	(Hodgson, 1836)	ICZN	Aethopyga ignicauda
ZMUA	AVSE	ZMUA_Aves	ZMUA	PreservedSpecimen	2394-1989	GR-ZMUA_Aves-2394-1989	E.T.T.E.	1			Whole animal (Stuffed)	1859	2394		GR						Shogolev Igor	urn:lsid:catalogueoflife.org:taxon:e835a409-18fd-11e5-9774-bc764e0806fb:col20150623	Cyanomitra cyanolaema	Animalia	Chordata	Aves	Passeriformes	Nectariniidae	Cyanomitra	cyanolaema	(Jardine & Fraser, 1852)	ICZN	Nectarinia cyanolaema
ZMUA	AVSE	ZMUA_Aves	ZMUA	PreservedSpecimen	2282-1877	GR-ZMUA_Aves-2282-1877	E.T.T.E.	1			Whole animal (Stuffed)	1859	2282		GR						Shogolev Igor	urn:lsid:catalogueoflife.org:taxon:e8359676-18fd-11e5-9774-bc764e0806fb:col20150623	Hedydipna platura	Animalia	Chordata	Aves	Passeriformes	Nectariniidae	Hedydipna	platura	(Vieillot, 1819)	ICZN	Anthreptes platura
ZMUA	AVSE	ZMUA_Aves	ZMUA	PreservedSpecimen	2231-1826	GR-ZMUA_Aves-2231-1826	E.T.T.E.	1			Whole animal (Stuffed)	1859	2231		GR						Shogolev Igor	urn:lsid:catalogueoflife.org:taxon:e7d5e0d7-18fd-11e5-9774-bc764e0806fb:col20150807	Quelea cardinalis	Animalia	Chordata	Aves	Passeriformes	Ploceidae	Quelea	cardinalis	(Hartlaub, 1880)	ICZN	Quelea cardinalis
ZMUA	AVSE	ZMUA_Aves	ZMUA	PreservedSpecimen	2438-2033	GR-ZMUA_Aves-2438-2033	E.T.T.E.	1			Whole animal (Stuffed)	1859	2438		GR						Shogolev Igor	urn:lsid:catalogueoflife.org:taxon:f6c0f55b-18fd-11e5-9774-bc764e0806fb:col20150623	Eriocnemis cupreoventris	Animalia	Chordata	Aves	Apodiformes	Trochilidae	Eriocnemis	cupreoventris	(Fraser, 1840)	ICZN	Eriocnemis cupreoventis Fraser, 1840
ZMUA	AVSE	ZMUA_Aves	ZMUA	PreservedSpecimen	2264-1859	GR-ZMUA_Aves-2264-1859	E.T.T.E.	1			Whole animal (Stuffed)	1859	2264		GR						Shogolev Igor	urn:lsid:catalogueoflife.org:taxon:e7b8598a-18fd-11e5-9774-bc764e0806fb:col20150807	Platyrinchus leucoryphus	Animalia	Chordata	Aves	Passeriformes	Tyrannidae	Platyrinchus	leucoryphus	Wied-Neuwied, 1831	ICZN	Platyrinchus leucoryphus
ZMUA	AVSE	ZMUA_Aves	ZMUA	PreservedSpecimen	927-522	GR-ZMUA_Aves-927-522	E.T.T.E.	1			Whole animal (Stuffed)	1859	927		GR						Shogolev Igor	urn:lsid:catalogueoflife.org:taxon:ed13bc73-18fd-11e5-9774-bc764e0806fb:col20150623	Columba guinea	Animalia	Chordata	Aves	Columbiformes	Columbidae	Columba	guinea	Linnaeus, 1758	ICZN	Columba guinea L. 1758
ZMUA	AVSE	ZMUA_Aves	ZMUA	PreservedSpecimen	1679-1274	GR-ZMUA_Aves-1679-1274	E.T.T.E.; Pargadakis	1			Whole animal (Stuffed)	1859	1679	Colombia	GR	Colombia	Coordinates according to: http://bl.ocks.org/rdmpage/raw/9951904/	3.75998	-72.6178	947417	Shogolev Igor	urn:lsid:catalogueoflife.org:taxon:f6c68e4f-18fd-11e5-9774-bc764e0806fb:col20150623	Coeligena helianthea	Animalia	Chordata	Aves	Apodiformes	Trochilidae	Coeligena	helianthea	(Lesson, 1839)	ICZN	Coeligena helianthea Lesson 1838
ZMUA	AVSE	ZMUA_Aves	ZMUA	PreservedSpecimen	632-227	GR-ZMUA_Aves-632-227	E.T.T.E.; Schrader G.	1			Whole animal (Stuffed)	1859	632		GR						Shogolev Igor	urn:lsid:catalogueoflife.org:taxon:fbbf2590-18fd-11e5-9774-bc764e0806fb:col20150807	Vanellus spinosus	Animalia	Chordata	Aves	Charadriiformes	Charadriidae	Vanellus	spinosus	(Linnaeus, 1758)	ICZN	Vanellus spinosus (L.), 1758
ZMUA	AVSE	ZMUA_Aves	ZMUA	PreservedSpecimen	1951-1546	GR-ZMUA_Aves-1951-1546	E.T.T.E.; Villard C. d.	1			Whole animal (Stuffed)	1859	1951	Brazil	GR	Brazil	Coordinates according to: http://bl.ocks.org/rdmpage/raw/9951904/	-12.607	-54.423	2281819	Shogolev Igor	urn:lsid:catalogueoflife.org:taxon:e7d5f7ab-18fd-11e5-9774-bc764e0806fb:col20150807	Ramphocelus bresilius	Animalia	Chordata	Aves	Passeriformes	Thraupidae	Ramphocelus	bresilius	(Linnaeus, 1766)	ICZN	Ramphocelus bresilius
ZMUA	AVSE	ZMUA_Aves	ZMUA	PreservedSpecimen	2095-1690	GR-ZMUA_Aves-2095-1690	E.T.T.E.; Villard C. d.	1			Whole animal (Stuffed)	1859	2095	Brazil	GR	Brazil	Coordinates according to: http://bl.ocks.org/rdmpage/raw/9951904/	-12.607	-54.423	2281819	Shogolev Igor	urn:lsid:catalogueoflife.org:taxon:ebe1974e-ac8e-11e3-805d-020044200006:col20150401	Cacicus haemorrhous	Animalia	Chordata	Aves	Passeriformes	Icteridae	Cacicus	haemorrhous	(Linnaeus, 1766)	ICZN	Cacicus haemorrhous
ZMUA	AVSE	ZMUA_Aves	ZMUA	PreservedSpecimen	1430-1025	GR-ZMUA_Aves-1430-1025	E.T.T.E.; Villard C. d.	1			Whole animal (Stuffed)	1859	1430	Brazil	GR	Brazil	Coordinates according to: http://bl.ocks.org/rdmpage/raw/9951904/	-12.607	-54.423	2281819	Shogolev Igor	urn:lsid:catalogueoflife.org:taxon:e6ee97e4-18fd-11e5-9774-bc764e0806fb:col20150807	Procnias nudicollis	Animalia	Chordata	Aves	Passeriformes	Cotingidae	Procnias	nudicollis	(Vieillot, 1817)	ICZN	Procnias nudicollis
ZMUA	AVSE	ZMUA_Aves	ZMUA	PreservedSpecimen	1676-1271	GR-ZMUA_Aves-1676-1271	E.T.T.E.; Villard C. d.	1			Whole animal (Stuffed)	1859	1676	Brazil	GR	Brazil	Coordinates according to: http://bl.ocks.org/rdmpage/raw/9951904/	-12.607	-54.423	2281819	Shogolev Igor	urn:lsid:catalogueoflife.org:taxon:f72d973a-18fd-11e5-9774-bc764e0806fb:col20150623	Hylocharis cyanus	Animalia	Chordata	Aves	Apodiformes	Trochilidae	Hylocharis	cyanus	(Vieillot, 1818)	ICZN	Hylocharis cyanus Vieillot, 1818
ZMUA	AVSE	ZMUA_Aves	ZMUA	PreservedSpecimen	2009-1604	GR-ZMUA_Aves-2009-1604	E.T.T.E.; Villard C. d.	1			Whole animal (Stuffed)	1859	2009	Brazil	GR	Brazil	Coordinates according to: http://bl.ocks.org/rdmpage/raw/9951904/	-12.607	-54.423	2281819	Shogolev Igor	urn:lsid:catalogueoflife.org:taxon:e81d295d-18fd-11e5-9774-bc764e0806fb:col20150807	Passerina cyanea	Animalia	Chordata	Aves	Passeriformes	Cardinalidae	Passerina	cyanea	(Linnaeus, 1766)	ICZN	Passerina cyanea
ZMUA	AVSE	ZMUA_Aves	ZMUA	PreservedSpecimen	1682-1277	GR-ZMUA_Aves-1682-1277	E.T.T.E.; Villard C. d.	1			Whole animal (Stuffed)	1859	1682	Brazil	GR	Brazil	Coordinates according to: http://bl.ocks.org/rdmpage/raw/9951904/	-12.607	-54.423	2281819	Shogolev Igor	urn:lsid:catalogueoflife.org:taxon:f6c0f55b-18fd-11e5-9774-bc764e0806fb:col20150623	Eriocnemis cupreoventris	Animalia	Chordata	Aves	Apodiformes	Trochilidae	Eriocnemis	cupreoventris	(Fraser, 1840)	ICZN	Eriocnemis cupreoventris Fraser, 1840
ZMUA	AVSE	ZMUA_Aves	ZMUA	PreservedSpecimen	1655-1250	GR-ZMUA_Aves-1655-1250	E.T.T.E.; Villard C. d.	1			Whole animal (Stuffed)	1859	1655	Brazil	GR	Brazil	Coordinates according to: http://bl.ocks.org/rdmpage/raw/9951904/	-12.607	-54.423	2281819	Shogolev Igor	urn:lsid:catalogueoflife.org:taxon:0304762d-18fe-11e5-9774-bc764e0806fb:col20150623	Florisuga fusca	Animalia	Chordata	Aves	Apodiformes	Trochilidae	Florisuga	fusca	(Vieillot, 1817)	ICZN	Florisuga fusca Vieillot 1817
ZMUA	AVSE	ZMUA_Aves	ZMUA	PreservedSpecimen	1670-1265	GR-ZMUA_Aves-1670-1265	E.T.T.E.; Villard C. d.	1			Whole animal (Stuffed)	1859	1670	Brazil	GR	Brazil	Coordinates according to: http://bl.ocks.org/rdmpage/raw/9951904/	-12.607	-54.423	2281819	Shogolev Igor	urn:lsid:catalogueoflife.org:taxon:23b03ea9-18fe-11e5-9774-bc764e0806fb:col20150623	Heliangelus amethysticollis clarisse	Animalia	Chordata	Aves	Apodiformes	Trochilidae	Heliangelus	amethysticollis	(Longuemare, 1841)	ICZN	Heliangelus clarissae Longuemare, 1841
ZMUA	AVSE	ZMUA_Aves	ZMUA	PreservedSpecimen	2112-1707	GR-ZMUA_Aves-2112-1707	E.T.T.E.; Villard C. d.	1			Whole animal (Stuffed)	1859	2112		GR	S. America	Coordinates according to: http://bl.ocks.org/rdmpage/raw/9951904/	-20.7716	-58.4234	3930928	Shogolev Igor	urn:lsid:catalogueoflife.org:taxon:e7d5f255-18fd-11e5-9774-bc764e0806fb:col20150623	Chrysomus ruficapillus	Animalia	Chordata	Aves	Passeriformes	Icteridae	Chrysomus	ruficapillus	(Vieillot, 1819)	ICZN	Agelaius ruficapillus
ZMUA	AVSE	ZMUA_Aves	ZMUA	PreservedSpecimen	2104-1699	GR-ZMUA_Aves-2104-1699	E.T.T.E.; Villard C. d.	1			Whole animal (Stuffed)	1859	2104	Brazil	GR	Brazil	Coordinates according to: http://bl.ocks.org/rdmpage/raw/9951904/	-12.607	-54.423	2281819	Shogolev Igor	urn:lsid:catalogueoflife.org:taxon:e7d647e6-18fd-11e5-9774-bc764e0806fb:col20150623	Chrysomus icterocephalus	Animalia	Chordata	Aves	Passeriformes	Icteridae	Chrysomus	icterocephalus	(Linnaeus, 1766)	ICZN	Agelaius icterocephalus
ZMUA	AVSE	ZMUA_Aves	ZMUA	PreservedSpecimen	2098-1693	GR-ZMUA_Aves-2098-1693	E.T.T.E.; Villard C. d.	1			Whole animal (Stuffed)	1859	2098	Mexico	GR	Mexico	Coordinates according to: http://bl.ocks.org/rdmpage/raw/9951904/	23.9501	-102.947	1738309	Shogolev Igor	urn:lsid:catalogueoflife.org:taxon:e7ab22a4-18fd-11e5-9774-bc764e0806fb:col20150807	Sturnella militaris	Animalia	Chordata	Aves	Passeriformes	Icteridae	Sturnella	militaris	(Linnaeus, 1758)	ICZN	Leistes militaris
ZMUA	AVSE	ZMUA_Aves	ZMUA	PreservedSpecimen	2105-1700	GR-ZMUA_Aves-2105-1700	E.T.T.E.; Villard C. d.	1			Whole animal (Stuffed)	1859	2105	Brazil	GR	Brazil	Coordinates according to: http://bl.ocks.org/rdmpage/raw/9951904/	-12.607	-54.423	2281819	Shogolev Igor	urn:lsid:catalogueoflife.org:taxon:e82270a3-18fd-11e5-9774-bc764e0806fb:col20150623	Icterus nigrogularis	Animalia	Chordata	Aves	Passeriformes	Icteridae	Icterus	nigrogularis	(Hahn, 1819)	ICZN	Icterus nigrogularis
ZMUA	AVSE	ZMUA_Aves	ZMUA	PreservedSpecimen	1688-1283	GR-ZMUA_Aves-1688-1283	E.T.T.E.; Villard C. d.	1			Whole animal (Stuffed)	1859	1688	Brazil	GR	Brazil	Coordinates according to: http://bl.ocks.org/rdmpage/raw/9951904/	-12.607	-54.423	2281819	Shogolev Igor	urn:lsid:catalogueoflife.org:taxon:f73fec24-18fd-11e5-9774-bc764e0806fb:col20150623	Anthracothorax nigricollis	Animalia	Chordata	Aves	Apodiformes	Trochilidae	Anthracothorax	nigricollis	(Vieillot, 1817)	ICZN	Anthracothorax nigricolis Vieillot, 1817
ZMUA	AVSE	ZMUA_Aves	ZMUA	PreservedSpecimen	1885-1480	GR-ZMUA_Aves-1885-1480	E.T.T.E.; Villard C. d.	1	M	adult	Whole animal (Stuffed)	1859	1885	Mexico	GR	Mexico	Coordinates according to: http://bl.ocks.org/rdmpage/raw/9951904/	23.9501	-102.947	1738309	Shogolev Igor	urn:lsid:catalogueoflife.org:taxon:e8258ce8-18fd-11e5-9774-bc764e0806fb:col20150623	Cardinalis cardinalis	Animalia	Chordata	Aves	Passeriformes	Cardinalidae	Cardinalis	cardinalis	(Linnaeus, 1758)	ICZN	Cardinalis cardinalis
ZMUA	AVSE	ZMUA_Aves	ZMUA	PreservedSpecimen	2078-1673	GR-ZMUA_Aves-2078-1673	E.T.T.E.; Villard C. d.	1			Whole animal (Stuffed)	1859	2078	Brazil	GR	Brazil	Coordinates according to: http://bl.ocks.org/rdmpage/raw/9951904/	-12.607	-54.423	2281819	Shogolev Igor	urn:lsid:catalogueoflife.org:taxon:e825ac64-18fd-11e5-9774-bc764e0806fb:col20150730	Molothrus bonariensis	Animalia	Chordata	Aves	Passeriformes	Icteridae	Molothrus	bonariensis	(Gmelin, 1789)	ICZN	Molothrus bonariensis
ZMUA	AVSE	ZMUA_Aves	ZMUA	PreservedSpecimen	1492-1087	GR-ZMUA_Aves-1492-1087	E.T.T.E.; Villard C. d.	1			Whole animal (Stuffed)	1859	1492	Brazil	GR	Brazil	Coordinates according to: http://bl.ocks.org/rdmpage/raw/9951904/	-12.607	-54.423	2281819	Shogolev Igor	urn:lsid:catalogueoflife.org:taxon:e7c7559b-18fd-11e5-9774-bc764e0806fb:col20150730	Myiodynastes maculatus	Animalia	Chordata	Aves	Passeriformes	Tyrannidae	Myiodynastes	maculatus	(Statius Muller, 1776)	ICZN	Myiodynastes maculatus
ZMUA	AVSE	ZMUA_Aves	ZMUA	PreservedSpecimen	1484-1079	GR-ZMUA_Aves-1484-1079	E.T.T.E.; Villard C. d.	1			Whole animal (Stuffed)	1859	1484	Brazil	GR	Brazil	Coordinates according to: http://bl.ocks.org/rdmpage/raw/9951904/	-12.607	-54.423	2281819	Shogolev Igor	urn:lsid:catalogueoflife.org:taxon:e6f105e4-18fd-11e5-9774-bc764e0806fb:col20150730	Myiozetetes cayanensis	Animalia	Chordata	Aves	Passeriformes	Tyrannidae	Myiozetetes	cayanensis	(Linnaeus, 1766)	ICZN	Myiozetetes cayanensis
ZMUA	AVSE	ZMUA_Aves	ZMUA	PreservedSpecimen	1502-1097	GR-ZMUA_Aves-1502-1097	E.T.T.E.; Villard C. d.	1			Whole animal (Stuffed)	1859	1502	Brazil	GR	Brazil	Coordinates according to: http://bl.ocks.org/rdmpage/raw/9951904/	-12.607	-54.423	2281819	Shogolev Igor	urn:lsid:catalogueoflife.org:taxon:e825d5a4-18fd-11e5-9774-bc764e0806fb:col20150807	Pyrocephalus rubinus	Animalia	Chordata	Aves	Passeriformes	Tyrannidae	Pyrocephalus	rubinus	(Boddaert, 1783)	ICZN	Pyrocephalus rubinus
ZMUA	AVSE	ZMUA_Aves	ZMUA	PreservedSpecimen	2529-2124	GR-ZMUA_Aves-2529-2124	E.T.T.E.; Villard C. d.	1			Whole animal (Stuffed)	1859	2529	Mexico	GR	Mexico	Coordinates according to: http://bl.ocks.org/rdmpage/raw/9951904/	23.9501	-102.947	1738309	Shogolev Igor	urn:lsid:catalogueoflife.org:taxon:f88c46ea-18fd-11e5-9774-bc764e0806fb:col20150623	Dendroica petechia	Animalia	Chordata	Aves	Passeriformes	Parulidae	Dendroica	petechia	(Linnaeus, 1766)	ICZN	Dendroica petechia
ZMUA	AVSE	ZMUA_Aves	ZMUA	PreservedSpecimen	1499-1094	GR-ZMUA_Aves-1499-1094	E.T.T.E.; Villard C. d.	1	F	adult	Whole animal (Stuffed)	1859	1499	Brazil	GR	Brazil	Coordinates according to: http://bl.ocks.org/rdmpage/raw/9951904/	-12.607	-54.423	2281819	Shogolev Igor	urn:lsid:catalogueoflife.org:taxon:e7abb06e-18fd-11e5-9774-bc764e0806fb:col20150807	Thamnophilus palliatus	Animalia	Chordata	Aves	Passeriformes	Thamnophilidae	Thamnophilus	palliatus	(Lichtenstein, 1823)	ICZN	Thamnophilus palliatus
ZMUA	AVSE	ZMUA_Aves	ZMUA	PreservedSpecimen	1645-1240	GR-ZMUA_Aves-1645-1240	E.T.T.E.; Villard C. d.	1			Whole animal (Stuffed)	1859	1645	Brazil	GR	Brazil	Coordinates according to: http://bl.ocks.org/rdmpage/raw/9951904/	-12.607	-54.423	2281819	Shogolev Igor	urn:lsid:catalogueoflife.org:taxon:23b03ea9-18fe-11e5-9774-bc764e0806fb:col20150623	Heliangelus amethysticollis clarisse	Animalia	Chordata	Aves	Apodiformes	Trochilidae	Heliangelus	amethysticollis	(Longuemare, 1841)	ICZN	Heliangelus clarissae Longuemare, 1841
ZMUA	AVSE	ZMUA_Aves	ZMUA	PreservedSpecimen	1684-1279	GR-ZMUA_Aves-1684-1279	E.T.T.E.; Villard C. d.	1			Whole animal (Stuffed)	1859	1684	Brazil	GR	Brazil	Coordinates according to: http://bl.ocks.org/rdmpage/raw/9951904/	-12.607	-54.423	2281819	Shogolev Igor	urn:lsid:catalogueoflife.org:taxon:f70928a4-18fd-11e5-9774-bc764e0806fb:col20150623	Heliodoxa jacula	Animalia	Chordata	Aves	Apodiformes	Trochilidae	Heliodoxa	jacula	Gould, 1850	ICZN	Heliodoxa jacula Gould, 1850
ZMUA	AVSE	ZMUA_Aves	ZMUA	PreservedSpecimen	2340-1935	GR-ZMUA_Aves-2340-1935	E.T.T.E.; Villard C. d.	1			Whole animal (Stuffed)	1859	2340	Mexico	GR	Mexico	Coordinates according to: http://bl.ocks.org/rdmpage/raw/9951904/	23.9501	-102.947	1738309	Shogolev Igor	urn:lsid:catalogueoflife.org:taxon:e6e5caf1-18fd-11e5-9774-bc764e0806fb:col20150623	Cyanocompsa brissonii	Animalia	Chordata	Aves	Passeriformes	Cardinalidae	Cyanocompsa	brissonii	(Lichtenstein, 1823)	ICZN	Cyanocompsa cyanea
ZMUA	AVSE	ZMUA_Aves	ZMUA	PreservedSpecimen	2079-1674	GR-ZMUA_Aves-2079-1674	E.T.T.E.; Villard C. d.	1			Whole animal (Stuffed)	1859	2079	Brazil	GR	Brazil	Coordinates according to: http://bl.ocks.org/rdmpage/raw/9951904/	-12.607	-54.423	2281819	Shogolev Igor	urn:lsid:catalogueoflife.org:taxon:e6258fd7-18fd-11e5-9774-bc764e0806fb:col20150807	Pseudoleistes guirahuro	Animalia	Chordata	Aves	Passeriformes	Icteridae	Pseudoleistes	guirahuro	(Vieillot, 1819)	ICZN	Pseudoleistes guirahuro
ZMUA	AVSE	ZMUA_Aves	ZMUA	PreservedSpecimen	2260-1855	GR-ZMUA_Aves-2260-1855	E.T.T.E.; Villard C. d.	1			Whole animal (Stuffed)	1859	2260	Brazil	GR	Brazil	Coordinates according to: http://bl.ocks.org/rdmpage/raw/9951904/	-12.607	-54.423	2281819	Shogolev Igor	urn:lsid:catalogueoflife.org:taxon:e7bf53c2-18fd-11e5-9774-bc764e0806fb:col20150623	Dacnis cayana	Animalia	Chordata	Aves	Passeriformes	Thraupidae	Dacnis	cayana	(Linnaeus, 1766)	ICZN	Dacnis cayana
ZMUA	AVSE	ZMUA_Aves	ZMUA	PreservedSpecimen	2311-1906	GR-ZMUA_Aves-2311-1906	E.T.T.E.; Villard C. d.	1			Whole animal (Stuffed)	1859	2311	Mexico	GR	Mexico	Coordinates according to: http://bl.ocks.org/rdmpage/raw/9951904/	23.9501	-102.947	1738309	Shogolev Igor	urn:lsid:catalogueoflife.org:taxon:eaacbd0f-ac8e-11e3-805d-020044200006:col20150401	Tangara mexicana	Animalia	Chordata	Aves	Passeriformes	Thraupidae	Tangara	mexicana	(Linnaeus, 1766)	ICZN	Tangara mexicana
ZMUA	AVSE	ZMUA_Aves	ZMUA	PreservedSpecimen	2397-1992	GR-ZMUA_Aves-2397-1992	E.T.T.E.; Villard C. d.	1			Whole animal (Stuffed)	1859	2397	Mexico	GR	Mexico	Coordinates according to: http://bl.ocks.org/rdmpage/raw/9951904/	23.9501	-102.947	1738309	Shogolev Igor	urn:lsid:catalogueoflife.org:taxon:f7096db5-18fd-11e5-9774-bc764e0806fb:col20150623	Heliodoxa gularis	Animalia	Chordata	Aves	Apodiformes	Trochilidae	Heliodoxa	gularis	(Gould, 1860)	ICZN	Heliodoxa gularis
ZMUA	AVSE	ZMUA_Aves	ZMUA	PreservedSpecimen	2623-2218	GR-ZMUA_Aves-2623-2218	E.T.T.E.; Villard C. d.	1			Whole animal (Stuffed)	1859	2623	Mexico	GR	Mexico	Coordinates according to: http://bl.ocks.org/rdmpage/raw/9951904/	23.9501	-102.947	1738309	Shogolev Igor	urn:lsid:catalogueoflife.org:taxon:e7d66d0a-18fd-11e5-9774-bc764e0806fb:col20150807	Tyrannus savana	Animalia	Chordata	Aves	Passeriformes	Tyrannidae	Tyrannus	savana	Vieillot, 1808	ICZN	Muscivora tyrannus
ZMUA	AVSE	ZMUA_Aves	ZMUA	PreservedSpecimen	2073-1668	GR-ZMUA_Aves-2073-1668	E.T.T.E.; Villard C. d.	1			Whole animal (Stuffed)	1859	2073	Mexico	GR	Mexico	Coordinates according to: http://bl.ocks.org/rdmpage/raw/9951904/	23.9501	-102.947	1738309	Shogolev Igor	urn:lsid:catalogueoflife.org:taxon:e625ce72-18fd-11e5-9774-bc764e0806fb:col20150807	Psarocolius decumanus	Animalia	Chordata	Aves	Passeriformes	Icteridae	Psarocolius	decumanus	(Pallas, 1769)	ICZN	Psarocolius decumanus Pallas, 1769
ZMUA	AVSE	ZMUA_Aves	ZMUA	PreservedSpecimen	1689-1284	GR-ZMUA_Aves-1689-1284	E.T.T.E.; Villard C. d.	1			Whole animal (Stuffed)	1859	1689	Brazil	GR	Brazil	Coordinates according to: http://bl.ocks.org/rdmpage/raw/9951904/	-12.607	-54.423	2281819	Shogolev Igor	urn:lsid:catalogueoflife.org:taxon:f6c62286-18fd-11e5-9774-bc764e0806fb:col20150623	Heliangelus amethysticollis	Animalia	Chordata	Aves	Apodiformes	Trochilidae	Heliangelus	amethysticollis	(Orbigny & Lafresnaye, 1838)	ICZN	Heliangelus amethysticollis d' Orbigni 1838
ZMUA	AVSE	ZMUA_Aves	ZMUA	PreservedSpecimen	2341-1936	GR-ZMUA_Aves-2341-1936	E.T.T.E.; Villard C. d.	1			Whole animal (Stuffed)	1859	2341		GR						Shogolev Igor	urn:lsid:catalogueoflife.org:taxon:e8217c3a-18fd-11e5-9774-bc764e0806fb:col20150623	Hemithraupis flavicollis	Animalia	Chordata	Aves	Passeriformes	Thraupidae	Hemithraupis	flavicollis	(Vieillot, 1818)	ICZN	Hemithraupis flavicollis
ZMUA	AVSE	ZMUA_Aves	ZMUA	PreservedSpecimen	2396-1991	GR-ZMUA_Aves-2396-1991	E.T.T.E.; Villard C. d.	1			Whole animal (Stuffed)	1859	2396		GR						Shogolev Igor	urn:lsid:catalogueoflife.org:taxon:ee13cf83-18fd-11e5-9774-bc764e0806fb:col20150623	Colibri thalassinus	Animalia	Chordata	Aves	Apodiformes	Trochilidae	Colibri	thalassinus	(Swainson, 1827)	ICZN	Colibri thalassinus Swainson, 1827
ZMUA	AVSE	ZMUA_Aves	ZMUA	PreservedSpecimen	2418-2013	GR-ZMUA_Aves-2418-2013	E.T.T.E.; Villard C. d.	1			Whole animal (Stuffed)	1859	2418		GR						Shogolev Igor	urn:lsid:catalogueoflife.org:taxon:f8159a87-18fd-11e5-9774-bc764e0806fb:col20150623	Geothlypis aequinoctialis	Animalia	Chordata	Aves	Passeriformes	Parulidae	Geothlypis	aequinoctialis	(Gmelin, 1789)	ICZN	Geothlypis aequinoctialis
ZMUA	AVSE	ZMUA_Aves	ZMUA	PreservedSpecimen	470-65	GR-ZMUA_Aves-470-65	Guicciardi	1	F		Whole animal (Stuffed)	1859	470	Greece	GR	Attica	Coordinates according to: http://bl.ocks.org/rdmpage/raw/9951904/	37.9789	23.6696	50004	Shogolev Igor	urn:lsid:catalogueoflife.org:taxon:fdd31c6a-ac8e-11e3-805d-020044200006:col20150401	Accipiter badius	Animalia	Chordata	Aves	Accipitriformes	Accipitridae	Accipiter	badius	(Gmelin, 1788)	ICZN	Accipiter badius Gmelin, 1788
ZMUA	AVSE	ZMUA_Aves	ZMUA	PreservedSpecimen	1819-1414	GR-ZMUA_Aves-1819-1414	Heldreich Th.	1			Whole animal (Stuffed)	1859	1819		GR						Shogolev Igor	urn:lsid:catalogueoflife.org:taxon:e835d604-18fd-11e5-9774-bc764e0806fb:col20150623	Cinnyris pulchellus	Animalia	Chordata	Aves	Passeriformes	Nectariniidae	Cinnyris	pulchellus	(Linnaeus, 1766)	ICZN	Nectarinia pulchella
ZMUA	AVSE	ZMUA_Aves	ZMUA	PreservedSpecimen	2395-1990	GR-ZMUA_Aves-2395-1990	Heldreich Th.	1			Whole animal (Stuffed)	1859	2395		GR						Shogolev Igor	urn:lsid:catalogueoflife.org:taxon:e835d604-18fd-11e5-9774-bc764e0806fb:col20150623	Cinnyris pulchellus	Animalia	Chordata	Aves	Passeriformes	Nectariniidae	Cinnyris	pulchellus	(Linnaeus, 1766)	ICZN	Nectarinia pulchella
ZMUA	AVSE	ZMUA_Aves	ZMUA	PreservedSpecimen	1024-619	GR-ZMUA_Aves-1024-619	Kinberg	1	M	adult	Whole animal (Stuffed)	1859	1024		GR	Lapland	Coordinates according to: http://www.getty.edu/vow/TGNFullDisplay?find=lapland&place=&nation=&prev_page=1&english=Y&subjectid=7010028	68.2383	25.2876	390067	Shogolev Igor	urn:lsid:catalogueoflife.org:taxon:f3aba72c-ac8e-11e3-805d-020044200006:col20150401	Surnia ulula	Animalia	Chordata	Aves	Strigiformes	Strigidae	Surnia	ulula	(Linnaeus, 1758)	ICZN	Surnia ulula (L.)
ZMUA	AVSE	ZMUA_Aves	ZMUA	PreservedSpecimen	1510-1105	GR-ZMUA_Aves-1510-1105	Leonard	1			Whole animal (Stuffed)	1859	1510	Brazil	GR	Brazil	Coordinates according to: http://bl.ocks.org/rdmpage/raw/9951904/	-12.607	-54.423	2281819	Shogolev Igor	urn:lsid:catalogueoflife.org:taxon:e6e38579-18fd-11e5-9774-bc764e0806fb:col20150623	Batara cinerea	Animalia	Chordata	Aves	Passeriformes	Thamnophilidae	Batara	cinerea	(Vieillot, 1819)	ICZN	Batara cinerea
ZMUA	AVSE	ZMUA_Aves	ZMUA	PreservedSpecimen	1654-1249	GR-ZMUA_Aves-1654-1249	Leonard	1			Whole animal (Stuffed)	1859	1654	Brazil	GR	Brazil	Coordinates according to: http://bl.ocks.org/rdmpage/raw/9951904/	-12.607	-54.423	2281819	Shogolev Igor	urn:lsid:catalogueoflife.org:taxon:23b295be-18fe-11e5-9774-bc764e0806fb:col20150623	Hylocharis cyanus cyanus	Animalia	Chordata	Aves	Apodiformes	Trochilidae	Hylocharis	cyanus	(Vieillot, 1818)	ICZN	Hylocharis cyanus cyanus Vieillot, 1818
ZMUA	AVSE	ZMUA_Aves	ZMUA	PreservedSpecimen	1653-1248	GR-ZMUA_Aves-1653-1248	Leonard	1			Whole animal (Stuffed)	1859	1653	Brazil	GR	Brazil	Coordinates according to: http://bl.ocks.org/rdmpage/raw/9951904/	-12.607	-54.423	2281819	Shogolev Igor	urn:lsid:catalogueoflife.org:taxon:f711af57-18fd-11e5-9774-bc764e0806fb:col20150623	Clytolaema rubricauda	Animalia	Chordata	Aves	Apodiformes	Trochilidae	Clytolaema	rubricauda	(Boddaert, 1783)	ICZN	Clytolaema rubricauda Boddaert, 1783
ZMUA	AVSE	ZMUA_Aves	ZMUA	PreservedSpecimen	1668-1263	GR-ZMUA_Aves-1668-1263	Leonard	1			Whole animal (Stuffed)	1859	1668	Brazil	GR	Brazil	Coordinates according to: http://bl.ocks.org/rdmpage/raw/9951904/	-12.607	-54.423	2281819	Shogolev Igor	urn:lsid:catalogueoflife.org:taxon:f711af57-18fd-11e5-9774-bc764e0806fb:col20150623	Clytolaema rubricauda	Animalia	Chordata	Aves	Apodiformes	Trochilidae	Clytolaema	rubricauda	(Boddaert, 1783)	ICZN	Clytolaema rubricauda Boddaert, 1783
ZMUA	AVSE	ZMUA_Aves	ZMUA	PreservedSpecimen	1671-1266	GR-ZMUA_Aves-1671-1266	Leonard	1			Whole animal (Stuffed)	1859	1671	Brazil	GR	Brazil	Coordinates according to: http://bl.ocks.org/rdmpage/raw/9951904/	-12.607	-54.423	2281819	Shogolev Igor	urn:lsid:catalogueoflife.org:taxon:f711af57-18fd-11e5-9774-bc764e0806fb:col20150623	Clytolaema rubricauda	Animalia	Chordata	Aves	Apodiformes	Trochilidae	Clytolaema	rubricauda	(Boddaert, 1783)	ICZN	Clytolaema rubricauda Boddaert, 1783
ZMUA	AVSE	ZMUA_Aves	ZMUA	PreservedSpecimen	1464-1059	GR-ZMUA_Aves-1464-1059	Leonard	1			Whole animal (Stuffed)	1859	1464	Brazil	GR	Brazil	Coordinates according to: http://bl.ocks.org/rdmpage/raw/9951904/	-12.607	-54.423	2281819	Shogolev Igor	urn:lsid:catalogueoflife.org:taxon:e81cac50-18fd-11e5-9774-bc764e0806fb:col20150623	Chiroxiphia caudata	Animalia	Chordata	Aves	Passeriformes	Pipridae	Chiroxiphia	caudata	(Shaw, 1793)	ICZN	Chiroxiphia caudata
ZMUA	AVSE	ZMUA_Aves	ZMUA	PreservedSpecimen	1470-1065	GR-ZMUA_Aves-1470-1065	Leonard	1			Whole animal (Stuffed)	1859	1470	Brazil	GR	Brazil	Coordinates according to: http://bl.ocks.org/rdmpage/raw/9951904/	-12.607	-54.423	2281819	Shogolev Igor	urn:lsid:catalogueoflife.org:taxon:219bd560-18fe-11e5-9774-bc764e0806fb:col20150730	Machaeropterus regulus regulus	Animalia	Chordata	Aves	Passeriformes	Pipridae	Machaeropterus	regulus	(Hahn, 1819)	ICZN	Machaeropterus regulus regulus
ZMUA	AVSE	ZMUA_Aves	ZMUA	PreservedSpecimen	1414-1009	GR-ZMUA_Aves-1414-1009	Leonard	1			Whole animal (Stuffed)	1859	1414	Brazil	GR	Brazil	Coordinates according to: http://bl.ocks.org/rdmpage/raw/9951904/	-12.607	-54.423	2281819	Shogolev Igor	urn:lsid:catalogueoflife.org:taxon:e7b962d4-18fd-11e5-9774-bc764e0806fb:col20150807	Pyroderus scutatus	Animalia	Chordata	Aves	Passeriformes	Cotingidae	Pyroderus	scutatus	(Shaw, 1792)	ICZN	Pyroderus scutatus
ZMUA	AVSE	ZMUA_Aves	ZMUA	PreservedSpecimen	1173-768	GR-ZMUA_Aves-1173-768	Leonard	1	M		Whole animal (Stuffed)	1859	1173	Brazil	GR	Brazil	Coordinates according to: http://bl.ocks.org/rdmpage/raw/9951904/	-12.607	-54.423	2281819	Shogolev Igor	urn:lsid:catalogueoflife.org:taxon:fbbea394-18fd-11e5-9774-bc764e0806fb:col20150807	Ramphastos vitellinus	Animalia	Chordata	Aves	Piciformes	Ramphastidae	Ramphastos	vitellinus	Lichtenstein, 1823	ICZN	Rhamphastos vitellinus
ZMUA	AVSE	ZMUA_Aves	ZMUA	PreservedSpecimen	1950-1545	GR-ZMUA_Aves-1950-1545	Leonard	1			Whole animal (Stuffed)	1859	1950	Brazil	GR	Brazil	Coordinates according to: http://bl.ocks.org/rdmpage/raw/9951904/	-12.607	-54.423	2281819	Shogolev Igor	urn:lsid:catalogueoflife.org:taxon:e7d5f7ab-18fd-11e5-9774-bc764e0806fb:col20150807	Ramphocelus bresilius	Animalia	Chordata	Aves	Passeriformes	Thraupidae	Ramphocelus	bresilius	(Linnaeus, 1766)	ICZN	Ramphocelus bresilius
ZMUA	AVSE	ZMUA_Aves	ZMUA	PreservedSpecimen	1508-1103	GR-ZMUA_Aves-1508-1103	Leonard	1			Whole animal (Stuffed)	1859	1508	Brazil	GR	Brazil	Coordinates according to: http://bl.ocks.org/rdmpage/raw/9951904/	-12.607	-54.423	2281819	Shogolev Igor	urn:lsid:catalogueoflife.org:taxon:e6e38579-18fd-11e5-9774-bc764e0806fb:col20150623	Batara cinerea	Animalia	Chordata	Aves	Passeriformes	Thamnophilidae	Batara	cinerea	(Vieillot, 1819)	ICZN	Batara cinerea
ZMUA	AVSE	ZMUA_Aves	ZMUA	PreservedSpecimen	1686-1281	GR-ZMUA_Aves-1686-1281	Leonard	1			Whole animal (Stuffed)	1859	1686	Brazil	GR	Brazil	Coordinates according to: http://bl.ocks.org/rdmpage/raw/9951904/	-12.607	-54.423	2281819	Shogolev Igor	urn:lsid:catalogueoflife.org:taxon:f711af57-18fd-11e5-9774-bc764e0806fb:col20150623	Clytolaema rubricauda	Animalia	Chordata	Aves	Apodiformes	Trochilidae	Clytolaema	rubricauda	(Boddaert, 1783)	ICZN	Clytolaema rubricauda Boddaert, 1783
ZMUA	AVSE	ZMUA_Aves	ZMUA	PreservedSpecimen	1669-1264	GR-ZMUA_Aves-1669-1264	Leonard	1			Whole animal (Stuffed)	1859	1669	Brazil	GR	Brazil	Coordinates according to: http://bl.ocks.org/rdmpage/raw/9951904/	-12.607	-54.423	2281819	Shogolev Igor	urn:lsid:catalogueoflife.org:taxon:f6c360b7-18fd-11e5-9774-bc764e0806fb:col20150623	Calliphlox amethystina	Animalia	Chordata	Aves	Apodiformes	Trochilidae	Calliphlox	amethystina	(Boddaert, 1783)	ICZN	Calliphlox amethystina Bodaert 1783
ZMUA	AVSE	ZMUA_Aves	ZMUA	PreservedSpecimen	1678-1273	GR-ZMUA_Aves-1678-1273	Leonard	1			Whole animal (Stuffed)	1859	1678	Brazil	GR	Brazil	Coordinates according to: http://bl.ocks.org/rdmpage/raw/9951904/	-12.607	-54.423	2281819	Shogolev Igor	urn:lsid:catalogueoflife.org:taxon:23b463fc-18fe-11e5-9774-bc764e0806fb:col20150807	Stephanoxis lalandi lalandi	Animalia	Chordata	Aves	Apodiformes	Trochilidae	Stephanoxis	lalandi	(Vieillot, 1818)	ICZN	Stephanoxis lalandi lalandi Vieillot, 1818
ZMUA	AVSE	ZMUA_Aves	ZMUA	PreservedSpecimen	2443-2038	GR-ZMUA_Aves-2443-2038	Leonard	1			Whole animal (Stuffed)	1859	2443	Brazil	GR	Brazil	Coordinates according to: http://bl.ocks.org/rdmpage/raw/9951904/	-12.607	-54.423	2281819	Shogolev Igor	urn:lsid:catalogueoflife.org:taxon:f72f07a4-18fd-11e5-9774-bc764e0806fb:col20150623	Chlorostilbon mellisugus	Animalia	Chordata	Aves	Apodiformes	Trochilidae	Chlorostilbon	mellisugus	(Linnaeus, 1758)	ICZN	Chlorostilbon mellisugus L. 1758
ZMUA	AVSE	ZMUA_Aves	ZMUA	PreservedSpecimen	2430-2025	GR-ZMUA_Aves-2430-2025	Leonard	1			Whole animal (Stuffed)	1859	2430	Brazil	GR	Brazil	Coordinates according to: http://bl.ocks.org/rdmpage/raw/9951904/	-12.607	-54.423	2281819	Shogolev Igor	urn:lsid:catalogueoflife.org:taxon:f7560c6b-18fd-11e5-9774-bc764e0806fb:col20150807	Phaethornis malaris	Animalia	Chordata	Aves	Apodiformes	Trochilidae	Phaethornis	malaris	(Nordmann, 1835)	ICZN	Phaethornis malaris Wordmann, 1835
ZMUA	AVSE	ZMUA_Aves	ZMUA	PreservedSpecimen	2145-1740	GR-ZMUA_Aves-2145-1740	Leonard	1			Whole animal (Stuffed)	1859	2145	Brazil	GR	Brazil	Coordinates according to: http://bl.ocks.org/rdmpage/raw/9951904/	-12.607	-54.423	2281819	Shogolev Igor	urn:lsid:catalogueoflife.org:taxon:e6e5caf1-18fd-11e5-9774-bc764e0806fb:col20150623	Cyanocompsa brissonii	Animalia	Chordata	Aves	Passeriformes	Cardinalidae	Cyanocompsa	brissonii	(Lichtenstein, 1823)	ICZN	Cyanocompsa cyanea
ZMUA	AVSE	ZMUA_Aves	ZMUA	PreservedSpecimen	2440-2035	GR-ZMUA_Aves-2440-2035	Leonard	1			Whole animal (Stuffed)	1859	2440	Brazil	GR	Brazil	Coordinates according to: http://bl.ocks.org/rdmpage/raw/9951904/	-12.607	-54.423	2281819	Shogolev Igor	urn:lsid:catalogueoflife.org:taxon:f72f07a4-18fd-11e5-9774-bc764e0806fb:col20150623	Chlorostilbon mellisugus	Animalia	Chordata	Aves	Apodiformes	Trochilidae	Chlorostilbon	mellisugus	(Linnaeus, 1758)	ICZN	Chlorostilbon mellisugus L. 1758
ZMUA	AVSE	ZMUA_Aves	ZMUA	PreservedSpecimen	1515-1110	GR-ZMUA_Aves-1515-1110	Leonard	1			Whole animal (Stuffed)	1859	1515		GR						Shogolev Igor	urn:lsid:catalogueoflife.org:taxon:e823ae22-18fd-11e5-9774-bc764e0806fb:col20150623	Lochmias nematura	Animalia	Chordata	Aves	Passeriformes	Furnariidae	Lochmias	nematura	(Lichtenstein, 1823)	ICZN	Lochmias nematura
ZMUA	AVSE	ZMUA_Aves	ZMUA	PreservedSpecimen	2110-1705	GR-ZMUA_Aves-2110-1705	Leonard	1			Whole animal (Stuffed)	1859	2110		GR						Shogolev Igor	urn:lsid:catalogueoflife.org:taxon:e7cbacf3-18fd-11e5-9774-bc764e0806fb:col20150807	Pipraeidea melanonota	Animalia	Chordata	Aves	Passeriformes	Thraupidae	Pipraeidea	melanonota	(Vieillot, 1819)	ICZN	Pipraeidea melanonota
ZMUA	AVSE	ZMUA_Aves	ZMUA	PreservedSpecimen	3211-2779	GR-ZMUA_Aves-3211-2779	Panaretos	1			Whole animal (Stuffed)	1859	3211		GR						Shogolev Igor	urn:lsid:catalogueoflife.org:taxon:e867a7fe-18fd-11e5-9774-bc764e0806fb:col20150807	Nycticorax nycticorax	Animalia	Chordata	Aves	Pelecaniformes	Ardeidae	Nycticorax	nycticorax	(Linnaeus, 1758)	ICZN	Nycticorax nycticorax
ZMUA	AVSE	ZMUA_Aves	ZMUA	PreservedSpecimen	1188-783	GR-ZMUA_Aves-1188-783	Parzoudaki	1			Whole animal (Stuffed)	1859	1188	French Guiana	GR	Cayenne	Coordinates for America since Cayene appears to more than one places in America	4.91606	-52.3036	4565	Shogolev Igor	urn:lsid:catalogueoflife.org:taxon:fbbed319-18fd-11e5-9774-bc764e0806fb:col20150807	Pteroglossus aracari	Animalia	Chordata	Aves	Piciformes	Ramphastidae	Pteroglossus	aracari	(Linnaeus, 1758)	ICZN	Pteroglossus aracari
ZMUA	AVSE	ZMUA_Aves	ZMUA	PreservedSpecimen	839-434	GR-ZMUA_Aves-839-434	Parzoudaki; E.T.T.E.	1	M		Whole animal (Stuffed)	1859	839	Colombia	GR	Colombia	Coordinates according to: http://bl.ocks.org/rdmpage/raw/9951904/	3.75998	-72.6178	947417	Shogolev Igor	urn:lsid:catalogueoflife.org:taxon:e82553e6-18fd-11e5-9774-bc764e0806fb:col20150623	Diglossopis cyanea	Animalia	Chordata	Aves	Passeriformes	Thraupidae	Diglossopis	cyanea	(Lafresnaye, 1840)	ICZN	Diglossa cyanea
ZMUA	AVSE	ZMUA_Aves	ZMUA	PreservedSpecimen	700-295	GR-ZMUA_Aves-700-295	Schneider G.; Villiard C. d.	1	F	adult	Whole animal (Stuffed)	1859	700	Brazil	GR	Brazil	Coordinates according to: http://bl.ocks.org/rdmpage/raw/9951904/	-12.607	-54.423	2281819	Shogolev Igor	urn:lsid:catalogueoflife.org:taxon:ee1ed360-18fd-11e5-9774-bc764e0806fb:col20150623	Laterallus melanophaius	Animalia	Chordata	Aves	Gruiformes	Rallidae	Laterallus	melanophaius	(Vieillot, 1819)	ICZN	Laterallus melanophais Vieillot, 1819
ZMUA	AVSE	ZMUA_Aves	ZMUA	PreservedSpecimen	1194-789	GR-ZMUA_Aves-1194-789	Schrader G.	1			Whole animal (Stuffed)	1859	1194	Brazil	GR	Brazil	Coordinates according to: http://bl.ocks.org/rdmpage/raw/9951904/	-12.607	-54.423	2281819	Shogolev Igor	urn:lsid:catalogueoflife.org:taxon:fbbeafdd-18fd-11e5-9774-bc764e0806fb:col20150807	Selenidera maculirostris	Animalia	Chordata	Aves	Piciformes	Ramphastidae	Selenidera	maculirostris	(Lichtenstein, 1823)	ICZN	Selenidera maculirostris
ZMUA	AVSE	ZMUA_Aves	ZMUA	PreservedSpecimen	516-111	GR-ZMUA_Aves-516-111	Schrader G.	1	M	adult	Whole animal (Stuffed)	1859	516	Greece	GR	Attica	Coordinates according to: http://bl.ocks.org/rdmpage/raw/9951904/	37.9789	23.6696	50004	Shogolev Igor	urn:lsid:catalogueoflife.org:taxon:f3723c17-18fd-11e5-9774-bc764e0806fb:col20150623	Buteo lagopus	Animalia	Chordata	Aves	Accipitriformes	Accipitridae	Buteo	lagopus	(Pontoppidan, 1763)	ICZN	Buteo lagopus Pontopp.
ZMUA	AVSE	ZMUA_Aves	ZMUA	PreservedSpecimen	2696-2291	GR-ZMUA_Aves-2696-2291	Schrader G.	1	M	adult	Whole animal (Stuffed)	1859	2696	Greece	GR	Attica	Coordinates according to: http://bl.ocks.org/rdmpage/raw/9951904/	37.9789	23.6696	50004	Shogolev Igor	urn:lsid:catalogueoflife.org:taxon:e866fe84-18fd-11e5-9774-bc764e0806fb:col20150623	Anas penelope	Animalia	Chordata	Aves	Anseriformes	Anatidae	Anas	penelope	Linnaeus, 1758	ICZN	Anas penelope L.
ZMUA	AVSE	ZMUA_Aves	ZMUA	PreservedSpecimen	1259-854	GR-ZMUA_Aves-1259-854	Schrader G.	1	F	adult	Whole animal (Stuffed)	1859	1259	Brazil	GR	Brazil	Coordinates according to: http://bl.ocks.org/rdmpage/raw/9951904/	-12.607	-54.423	2281819	Shogolev Igor	urn:lsid:catalogueoflife.org:taxon:f8158535-18fd-11e5-9774-bc764e0806fb:col20150623	Crotophaga major	Animalia	Chordata	Aves	Cuculiformes	Cuculidae	Crotophaga	major	Gmelin, 1788	ICZN	Crotophaga major J. F. Gmelin 1788
ZMUA	AVSE	ZMUA_Aves	ZMUA	PreservedSpecimen	1229-824	GR-ZMUA_Aves-1229-824	Schrader G.	1			Whole animal (Stuffed)	1859	1229	Brazil	GR	Brazil	Coordinates according to: http://bl.ocks.org/rdmpage/raw/9951904/	-12.607	-54.423	2281819	Shogolev Igor	urn:lsid:catalogueoflife.org:taxon:edee10ea-18fd-11e5-9774-bc764e0806fb:col20150623	Celeus flavescens	Animalia	Chordata	Aves	Piciformes	Picidae	Celeus	flavescens	(Gmelin, 1788)	ICZN	Celeus flavescens
ZMUA	AVSE	ZMUA_Aves	ZMUA	PreservedSpecimen	606-201	GR-ZMUA_Aves-606-201	Schrader G.	1			Whole animal (Stuffed)	1859	606		GR	Egypt	Coordinates according to: http://upload.wikimedia.org/wikipedia/commons/e/ec/Egypt_under_Muhammad_Ali_Dynasty_map_en.png	21.7953	30.2587	1188633	Shogolev Igor	urn:lsid:catalogueoflife.org:taxon:e8675bac-18fd-11e5-9774-bc764e0806fb:col20150807	Threskiornis aethiopicus	Animalia	Chordata	Aves	Pelecaniformes	Threskiornithidae	Threskiornis	aethiopicus	(Latham, 1790)	ICZN	Threskiornis aethiopicus Latham, 1790
ZMUA	AVSE	ZMUA_Aves	ZMUA	PreservedSpecimen	607-202	GR-ZMUA_Aves-607-202	Schrader G.	1			Whole animal (Stuffed)	1859	607		GR	Egypt	Coordinates according to: http://upload.wikimedia.org/wikipedia/commons/e/ec/Egypt_under_Muhammad_Ali_Dynasty_map_en.png	21.7953	30.2587	1188633	Shogolev Igor	urn:lsid:catalogueoflife.org:taxon:e8675bac-18fd-11e5-9774-bc764e0806fb:col20150807	Threskiornis aethiopicus	Animalia	Chordata	Aves	Pelecaniformes	Threskiornithidae	Threskiornis	aethiopicus	(Latham, 1790)	ICZN	Threskiornis aethiopicus Latham, 1790
ZMUA	AVSE	ZMUA_Aves	ZMUA	PreservedSpecimen	2167-1762	GR-ZMUA_Aves-2167-1762	Schrader G.	1			Whole animal (Stuffed)	1859	2167		GR	Nubia	Coordinates according to: http://www.getty.edu/vow/TGNFullDisplay?find=nubia&place=&nation=&prev_page=1&english=Y&subjectid=6004345	21.1178	28.568	1273343	Shogolev Igor	urn:lsid:catalogueoflife.org:taxon:e822e258-18fd-11e5-9774-bc764e0806fb:col20150623	Lagonosticta senegala	Animalia	Chordata	Aves	Passeriformes	Estrildidae	Lagonosticta	senegala	(Linnaeus, 1766)	ICZN	Lagonosticta senegala
ZMUA	AVSE	ZMUA_Aves	ZMUA	PreservedSpecimen	608-203	GR-ZMUA_Aves-608-203	Schrader G.	1			Whole animal (Stuffed)	1859	608		GR						Shogolev Igor	urn:lsid:catalogueoflife.org:taxon:e867493c-18fd-11e5-9774-bc764e0806fb:col20150623	Bostrychia hagedash	Animalia	Chordata	Aves	Pelecaniformes	Threskiornithidae	Bostrychia	hagedash	(Latham, 1790)	ICZN	Bostrychia hagedash Latham., 1790
ZMUA	AVSE	ZMUA_Aves	ZMUA	PreservedSpecimen	1117-712	GR-ZMUA_Aves-1117-712	Schrader G.	1			Whole animal (Stuffed)	1859	1117		GR	Abyssinia	Coordinates according to: http://bl.ocks.org/rdmpage/raw/9951904/	10.6657	39.783	664046	Shogolev Igor	urn:lsid:catalogueoflife.org:taxon:ed21f0e9-18fd-11e5-9774-bc764e0806fb:col20150623	Dendropicos goertae	Animalia	Chordata	Aves	Piciformes	Picidae	Dendropicos	goertae	(Statius Muller, 1776)	ICZN	Mesopicos goertae
ZMUA	AVSE	ZMUA_Aves	ZMUA	PreservedSpecimen	1495-1090	GR-ZMUA_Aves-1495-1090	Schrader G.	1			Whole animal (Stuffed)	1859	1495	Brazil	GR	Brazil	Coordinates according to: http://bl.ocks.org/rdmpage/raw/9951904/	-12.607	-54.423	2281819	Shogolev Igor	urn:lsid:catalogueoflife.org:taxon:ebe17c8c-ac8e-11e3-805d-020044200006:col20150401	Contopus virens	Animalia	Chordata	Aves	Passeriformes	Tyrannidae	Contopus	virens	(Linnaeus, 1766)	ICZN	Contopus virens
ZMUA	AVSE	ZMUA_Aves	ZMUA	PreservedSpecimen	1255-850	GR-ZMUA_Aves-1255-850	Spielter T. W.	1			Whole animal (Stuffed)	1859	1255	Brazil	GR	Brazil	Coordinates according to: http://bl.ocks.org/rdmpage/raw/9951904/	-12.607	-54.423	2281819	Shogolev Igor	urn:lsid:catalogueoflife.org:taxon:f81583d0-18fd-11e5-9774-bc764e0806fb:col20150623	Guira guira	Animalia	Chordata	Aves	Cuculiformes	Cuculidae	Guira	guira	(Gmelin, 1788)	ICZN	Guira guira J. F. Gmelin, 1788
ZMUA	AVSE	ZMUA_Aves	ZMUA	PreservedSpecimen	1146-741	GR-ZMUA_Aves-1146-741	Spielter T. W.	1			Whole animal (Stuffed)	1859	1146		GR	India	Coordinates according to: http://www.davidrumsey.com/luna/servlet/detail/RUMSEY~8~1~209897~5003705:India-?showTip=false&showTipAdvancedSearch=false&title=Search+Results%3A+List_No+equal+to+%271550.100%27&thumbnailViewUrlKey=link.view.search.url&helpUrl=http%3A%2F%2Fdoc.lunaimaging.com%2Fdisplay%2FV71D%2FLUNA%2BViewer%23LUNAViewer-LUNAViewer&fullTextSearchChecked=&advancedSearchUrl=http%3A%2F%2Fdo…	23.7268	83.8993	2005716	Shogolev Igor	urn:lsid:catalogueoflife.org:taxon:eda86bdd-18fd-11e5-9774-bc764e0806fb:col20150623	Anthracoceros albirostris	Animalia	Chordata	Aves	Bucerotiformes	Bucerotidae	Anthracoceros	albirostris	(Shaw, 1808)	ICZN	Anthracoceros albirostris Snaw Nodder, 1790
ZMUA	AVSE	ZMUA_Aves	ZMUA	PreservedSpecimen	1577-1172	GR-ZMUA_Aves-1577-1172	Villard C. d.	1			Whole animal (Stuffed)	1859	1577	Brazil	GR	Brazil	Coordinates according to: http://bl.ocks.org/rdmpage/raw/9951904/	-12.607	-54.423	2281819	Shogolev Igor	urn:lsid:catalogueoflife.org:taxon:ee137367-18fd-11e5-9774-bc764e0806fb:col20150730	Megaceryle torquata	Animalia	Chordata	Aves	Coraciiformes	Alcedinidae	Megaceryle	torquata	(Linnaeus, 1766)	ICZN	Megaceryle torquata L., 1766
ZMUA	AVSE	ZMUA_Aves	ZMUA	PreservedSpecimen	1956-1551	GR-ZMUA_Aves-1956-1551	Villard C. d.	1			Whole animal (Stuffed)	1859	1956	Brazil	GR	Brazil	Coordinates according to: http://bl.ocks.org/rdmpage/raw/9951904/	-12.607	-54.423	2281819	Shogolev Igor	urn:lsid:catalogueoflife.org:taxon:e6e6246e-18fd-11e5-9774-bc764e0806fb:col20150623	Anisognathus somptuosus	Animalia	Chordata	Aves	Passeriformes	Thraupidae	Anisognathus	somptuosus	(Lesson, 1831)	ICZN	Anisognathus somptuosus
ZMUA	AVSE	ZMUA_Aves	ZMUA	PreservedSpecimen	1818-1413	GR-ZMUA_Aves-1818-1413	Villard C. d.	1			Whole animal (Stuffed)	1859	1818	Brazil	GR	Brazil	Coordinates according to: http://bl.ocks.org/rdmpage/raw/9951904/	-12.607	-54.423	2281819	Shogolev Igor	urn:lsid:catalogueoflife.org:taxon:e6ee7f54-18fd-11e5-9774-bc764e0806fb:col20150623	Cyanerpes caeruleus	Animalia	Chordata	Aves	Passeriformes	Thraupidae	Cyanerpes	caeruleus	(Linnaeus, 1758)	ICZN	Cyanerpes caeruleus
ZMUA	AVSE	ZMUA_Aves	ZMUA	PreservedSpecimen	1468-1063	GR-ZMUA_Aves-1468-1063	Villard C. d.	1			Whole animal (Stuffed)	1859	1468	Mexico	GR	Mexico	Coordinates according to: http://bl.ocks.org/rdmpage/raw/9951904/	23.9501	-102.947	1738309	Shogolev Igor	urn:lsid:catalogueoflife.org:taxon:e7cb9c0c-18fd-11e5-9774-bc764e0806fb:col20150807	Pipra erythrocephala	Animalia	Chordata	Aves	Passeriformes	Pipridae	Pipra	erythrocephala	(Linnaeus, 1758)	ICZN	Pipra erythrocephala
ZMUA	AVSE	ZMUA_Aves	ZMUA	PreservedSpecimen	1143-738	GR-ZMUA_Aves-1143-738	Villard C. d.	1			Whole animal (Stuffed)	1859	1143	Brazil	GR	Brazil	Coordinates according to: http://bl.ocks.org/rdmpage/raw/9951904/	-12.607	-54.423	2281819	Shogolev Igor	urn:lsid:catalogueoflife.org:taxon:fb723c37-18fd-11e5-9774-bc764e0806fb:col20150807	Trogon mexicanus	Animalia	Chordata	Aves	Trogoniformes	Trogonidae	Trogon	mexicanus	Swainson, 1827	ICZN	Trogon mexicanus Swainson, 1827
ZMUA	AVSE	ZMUA_Aves	ZMUA	PreservedSpecimen	2344-1939	GR-ZMUA_Aves-2344-1939	Villard C. d.	1			Whole animal (Stuffed)	1859	2344	Brazil	GR	Brazil	Coordinates according to: http://bl.ocks.org/rdmpage/raw/9951904/	-12.607	-54.423	2281819	Shogolev Igor	urn:lsid:catalogueoflife.org:taxon:e7bba35b-18fd-11e5-9774-bc764e0806fb:col20150807	Paroaria capitata	Animalia	Chordata	Aves	Passeriformes	Emberizidae	Paroaria	capitata	(Orbigny & Lafresnaye, 1837)	ICZN	Paroaria capitata
ZMUA	AVSE	ZMUA_Aves	ZMUA	PreservedSpecimen	2239-1834	GR-ZMUA_Aves-2239-1834	Villard C. d.	1			Whole animal (Stuffed)	1859	2239	Mexico	GR	Mexico	Coordinates according to: http://bl.ocks.org/rdmpage/raw/9951904/	23.9501	-102.947	1738309	Shogolev Igor	urn:lsid:catalogueoflife.org:taxon:e7ac2761-18fd-11e5-9774-bc764e0806fb:col20150807	Paroaria dominicana	Animalia	Chordata	Aves	Passeriformes	Emberizidae	Paroaria	dominicana	(Linnaeus, 1758)	ICZN	Paroaria dominicana
ZMUA	AVSE	ZMUA_Aves	ZMUA	PreservedSpecimen	2049-1644	GR-ZMUA_Aves-2049-1644	Villard C. d.	1			Whole animal (Stuffed)	1859	2049	Mexico	GR	Mexico	Coordinates according to: http://bl.ocks.org/rdmpage/raw/9951904/	23.9501	-102.947	1738309	Shogolev Igor	urn:lsid:catalogueoflife.org:taxon:e825addb-18fd-11e5-9774-bc764e0806fb:col20150807	Quiscalus major	Animalia	Chordata	Aves	Passeriformes	Icteridae	Quiscalus	major	Vieillot, 1819	ICZN	Quiscalus major
ZMUA	AVSE	ZMUA_Aves	ZMUA	PreservedSpecimen	2094-1689	GR-ZMUA_Aves-2094-1689	Villard C. d.	1			Whole animal (Stuffed)	1859	2094	Mexico	GR	Mexico	Coordinates according to: http://bl.ocks.org/rdmpage/raw/9951904/	23.9501	-102.947	1738309	Shogolev Igor	urn:lsid:catalogueoflife.org:taxon:e825f9fb-18fd-11e5-9774-bc764e0806fb:col20150623	Cacicus chrysopterus	Animalia	Chordata	Aves	Passeriformes	Icteridae	Cacicus	chrysopterus	(Vigors, 1825)	ICZN	Cacicus chrysopterus
ZMUA	AVSE	ZMUA_Aves	ZMUA	PreservedSpecimen	1496-1091	GR-ZMUA_Aves-1496-1091	Villard C. d.	1			Whole animal (Stuffed)	1859	1496	Brazil	GR	Brazil	Coordinates according to: http://bl.ocks.org/rdmpage/raw/9951904/	-12.607	-54.423	2281819	Shogolev Igor	urn:lsid:catalogueoflife.org:taxon:e81ad570-18fd-11e5-9774-bc764e0806fb:col20150623	Conopophaga melanops	Animalia	Chordata	Aves	Passeriformes	Conopophagidae	Conopophaga	melanops	(Vieillot, 1818)	ICZN	Conopophaga melanops
ZMUA	AVSE	ZMUA_Aves	ZMUA	PreservedSpecimen	2108-1703	GR-ZMUA_Aves-2108-1703	Villard C. d.	1			Whole animal (Stuffed)	1859	2108	Mexico	GR	Mexico	Coordinates according to: http://bl.ocks.org/rdmpage/raw/9951904/	23.9501	-102.947	1738309	Shogolev Igor	urn:lsid:catalogueoflife.org:taxon:228aeb59-18fe-11e5-9774-bc764e0806fb:col20150623	Icterus icterus croconotus	Animalia	Chordata	Aves	Passeriformes	Icteridae	Icterus	icterus	(Wagler, 1829)	ICZN	Icterus icterus croconotus
ZMUA	AVSE	ZMUA_Aves	ZMUA	PreservedSpecimen	1187-782	GR-ZMUA_Aves-1187-782	Villard C. d.	1			Whole animal (Stuffed)	1859	1187	Mexico	GR	Mexico	Coordinates according to: http://bl.ocks.org/rdmpage/raw/9951904/	23.9501	-102.947	1738309	Shogolev Igor	urn:lsid:catalogueoflife.org:taxon:fbbed319-18fd-11e5-9774-bc764e0806fb:col20150807	Pteroglossus aracari	Animalia	Chordata	Aves	Piciformes	Ramphastidae	Pteroglossus	aracari	(Linnaeus, 1758)	ICZN	Pteroglossus aracari
ZMUA	AVSE	ZMUA_Aves	ZMUA	PreservedSpecimen	1189-784	GR-ZMUA_Aves-1189-784	Villard C. d.	1			Whole animal (Stuffed)	1859	1189	Brazil	GR	Brazil	Coordinates according to: http://bl.ocks.org/rdmpage/raw/9951904/	-12.607	-54.423	2281819	Shogolev Igor	urn:lsid:catalogueoflife.org:taxon:fbbec4ff-18fd-11e5-9774-bc764e0806fb:col20150623	Baillonius bailloni	Animalia	Chordata	Aves	Piciformes	Ramphastidae	Baillonius	bailloni	(Vieillot, 1819)	ICZN	Baillonius bailloni
ZMUA	AVSE	ZMUA_Aves	ZMUA	PreservedSpecimen	1948-1543	GR-ZMUA_Aves-1948-1543	Villard C. d.	1			Whole animal (Stuffed)	1859	1948	Mexico	GR	Mexico	Coordinates according to: http://bl.ocks.org/rdmpage/raw/9951904/	23.9501	-102.947	1738309	Shogolev Igor	urn:lsid:catalogueoflife.org:taxon:e7d5f7ab-18fd-11e5-9774-bc764e0806fb:col20150807	Ramphocelus bresilius	Animalia	Chordata	Aves	Passeriformes	Thraupidae	Ramphocelus	bresilius	(Linnaeus, 1766)	ICZN	Ramphocelus bresilius
ZMUA	AVSE	ZMUA_Aves	ZMUA	PreservedSpecimen	994-589	GR-ZMUA_Aves-994-589	Villard C. d.	1	M		Whole animal (Stuffed)	1859	994	Brazil	GR	Brazil	Coordinates according to: http://bl.ocks.org/rdmpage/raw/9951904/	-12.607	-54.423	2281819	Shogolev Igor	urn:lsid:catalogueoflife.org:taxon:e7c8964c-18fd-11e5-9774-bc764e0806fb:col20150807	Tangara velia	Animalia	Chordata	Aves	Passeriformes	Thraupidae	Tangara	velia	(Linnaeus, 1758)	ICZN	Tangara velia
ZMUA	AVSE	ZMUA_Aves	ZMUA	PreservedSpecimen	2156-1751	GR-ZMUA_Aves-2156-1751	Villard C. d.	1			Whole animal (Stuffed)	1859	2156	Mexico	GR	Mexico	Coordinates according to: http://bl.ocks.org/rdmpage/raw/9951904/	23.9501	-102.947	1738309	Shogolev Igor	urn:lsid:catalogueoflife.org:taxon:e7abdf14-18fd-11e5-9774-bc764e0806fb:col20150623	Carpornis cucullata	Animalia	Chordata	Aves	Passeriformes	Cotingidae	Carpornis	cucullata	(Swainson, 1821)	ICZN	Carpornis cucullatus
ZMUA	AVSE	ZMUA_Aves	ZMUA	PreservedSpecimen	2336-1931	GR-ZMUA_Aves-2336-1931	Villard C. d.	1			Whole animal (Stuffed)	1859	2336	Mexico	GR	Mexico	Coordinates according to: http://bl.ocks.org/rdmpage/raw/9951904/	23.9501	-102.947	1738309	Shogolev Igor	urn:lsid:catalogueoflife.org:taxon:e7c8139b-18fd-11e5-9774-bc764e0806fb:col20150807	Thraupis cyanoptera	Animalia	Chordata	Aves	Passeriformes	Thraupidae	Thraupis	cyanoptera	(Vieillot, 1817)	ICZN	Thraupis cyanoptera
ZMUA	AVSE	ZMUA_Aves	ZMUA	PreservedSpecimen	1979-1574	GR-ZMUA_Aves-1979-1574	Villard C. d.	1			Whole animal (Stuffed)	1859	1979	Brazil	GR	Brazil	Coordinates according to: http://bl.ocks.org/rdmpage/raw/9951904/	-12.607	-54.423	2281819	Shogolev Igor	urn:lsid:catalogueoflife.org:taxon:e81c25ea-18fd-11e5-9774-bc764e0806fb:col20150623	Caryothraustes canadensis	Animalia	Chordata	Aves	Passeriformes	Cardinalidae	Caryothraustes	canadensis	(Linnaeus, 1766)	ICZN	Caryothraustes canadensis
ZMUA	AVSE	ZMUA_Aves	ZMUA	PreservedSpecimen	2111-1706	GR-ZMUA_Aves-2111-1706	Villard C. d.	1			Whole animal (Stuffed)	1859	2111	Mexico	GR	Mexico	Coordinates according to: http://bl.ocks.org/rdmpage/raw/9951904/	23.9501	-102.947	1738309	Shogolev Igor	urn:lsid:catalogueoflife.org:taxon:e7d5ee19-18fd-11e5-9774-bc764e0806fb:col20150623	Agelasticus thilius	Animalia	Chordata	Aves	Passeriformes	Icteridae	Agelasticus	thilius	(Molina, 1782)	ICZN	Agelaius thilius
ZMUA	AVSE	ZMUA_Aves	ZMUA	PreservedSpecimen	2433-2028	GR-ZMUA_Aves-2433-2028	Villard C. d.	1			Whole animal (Stuffed)	1859	2433		GR						Shogolev Igor	urn:lsid:catalogueoflife.org:taxon:f711af57-18fd-11e5-9774-bc764e0806fb:col20150623	Clytolaema rubricauda	Animalia	Chordata	Aves	Apodiformes	Trochilidae	Clytolaema	rubricauda	(Boddaert, 1783)	ICZN	Clytolaema rubricauda Boddaert, 1783
ZMUA	AVSE	ZMUA_Aves	ZMUA	PreservedSpecimen	2016-1611	GR-ZMUA_Aves-2016-1611	E.T.T.E.	1			Whole animal (Stuffed)	1859	2016		GR	Africa	Coordinates according to: http://bl.ocks.org/rdmpage/raw/9951904/	2.31186	15.7562	4243522	Shogolev Igor	urn:lsid:catalogueoflife.org:taxon:e7b9ec94-18fd-11e5-9774-bc764e0806fb:col20150807	Uraeginthus bengalus	Animalia	Chordata	Aves	Passeriformes	Estrildidae	Uraeginthus	bengalus	(Linnaeus, 1766)	ICZN	Uraeginthus bengalus
ZMUA	AVSE	ZMUA_Aves	ZMUA	PreservedSpecimen	1599-1194	GR-ZMUA_Aves-1599-1194	E.T.T.E.	1			Whole animal (Stuffed)	1859	1599		GR	Africa	Coordinates according to: http://bl.ocks.org/rdmpage/raw/9951904/	2.31186	15.7562	4243522	Shogolev Igor	urn:lsid:catalogueoflife.org:taxon:ee210794-18fd-11e5-9774-bc764e0806fb:col20150730	Merops persicus	Animalia	Chordata	Aves	Coraciiformes	Meropidae	Merops	persicus	Pallas, 1773	ICZN	Merops persicus Pallas, 1773
ZMUA	AVSE	ZMUA_Aves	ZMUA	PreservedSpecimen	1498-1093	GR-ZMUA_Aves-1498-1093	E.T.T.E.	1	M	adult	Whole animal (Stuffed)	1859	1498	Brazil	GR	Brazil	Coordinates according to: http://bl.ocks.org/rdmpage/raw/9951904/	-12.607	-54.423	2281819	Shogolev Igor	urn:lsid:catalogueoflife.org:taxon:e7abb06e-18fd-11e5-9774-bc764e0806fb:col20150807	Thamnophilus palliatus	Animalia	Chordata	Aves	Passeriformes	Thamnophilidae	Thamnophilus	palliatus	(Lichtenstein, 1823)	ICZN	Thamnophilus palliatus
ZMUA	AVSE	ZMUA_Aves	ZMUA	PreservedSpecimen	1184-779	GR-ZMUA_Aves-1184-779	E.T.T.E.	1			Whole animal (Stuffed)	1859	1184		GR	S.E. Africa- Abyssinia	Coordinates according to: http://bl.ocks.org/rdmpage/raw/9951904/	10.6657	39.783	664046	Shogolev Igor	urn:lsid:catalogueoflife.org:taxon:fbc01a1d-18fd-11e5-9774-bc764e0806fb:col20150807	Tockus nasutus	Animalia	Chordata	Aves	Bucerotiformes	Bucerotidae	Tockus	nasutus	(Linnaeus, 1766)	ICZN	Tockus nasutus L., 1766
ZMUA	AVSE	ZMUA_Aves	ZMUA	PreservedSpecimen	2194-1789	GR-ZMUA_Aves-2194-1789	E.T.T.E.	1			Whole animal (Stuffed)	1859	2194	Brazil	GR	Brazil	Coordinates according to: http://bl.ocks.org/rdmpage/raw/9951904/	-12.607	-54.423	2281819	Shogolev Igor	urn:lsid:catalogueoflife.org:taxon:e7ba909d-18fd-11e5-9774-bc764e0806fb:col20150623	Estrilda astrild	Animalia	Chordata	Aves	Passeriformes	Estrildidae	Estrilda	astrild	(Linnaeus, 1758)	ICZN	Estrilda astrild
ZMUA	AVSE	ZMUA_Aves	ZMUA	PreservedSpecimen	720-315	GR-ZMUA_Aves-720-315	E.T.T.E.	1			Whole animal (Stuffed)	1859	720		GR	W. Africa	Coordinates according to: http://en.wikipedia.org/wiki/West_Africa	20.9625	0.796808	2055229	Shogolev Igor	urn:lsid:catalogueoflife.org:taxon:eda84f7b-18fd-11e5-9774-bc764e0806fb:col20150623	Halcyon senegalensis	Animalia	Chordata	Aves	Coraciiformes	Alcedinidae	Halcyon	senegalensis	(Linnaeus, 1766)	ICZN	Halcyon senegalensis L. 1766
ZMUA	AVSE	ZMUA_Aves	ZMUA	PreservedSpecimen	2058-1653	GR-ZMUA_Aves-2058-1653	E.T.T.E.	1			Whole animal (Stuffed)	1859	2058		GR	India	Coordinates according to: http://www.davidrumsey.com/luna/servlet/detail/RUMSEY~8~1~209897~5003705:India-?showTip=false&showTipAdvancedSearch=false&title=Search+Results%3A+List_No+equal+to+%271550.100%27&thumbnailViewUrlKey=link.view.search.url&helpUrl=http%3A%2F%2Fdoc.lunaimaging.com%2Fdisplay%2FV71D%2FLUNA%2BViewer%23LUNAViewer-LUNAViewer&fullTextSearchChecked=&advancedSearchUrl=http%3A%2F%2Fdo…	23.7268	83.8993	2005716	Shogolev Igor	urn:lsid:catalogueoflife.org:taxon:e6e4ea48-18fd-11e5-9774-bc764e0806fb:col20150623	Aplonis panayensis	Animalia	Chordata	Aves	Passeriformes	Sturnidae	Aplonis	panayensis	(Scopoli, 1786)	ICZN	Aplonis panayensis
ZMUA	AVSE	ZMUA_Aves	ZMUA	PreservedSpecimen	2061-1656	GR-ZMUA_Aves-2061-1656	E.T.T.E.	1			Whole animal (Stuffed)	1859	2061		GR	India	Coordinates according to: http://www.davidrumsey.com/luna/servlet/detail/RUMSEY~8~1~209897~5003705:India-?showTip=false&showTipAdvancedSearch=false&title=Search+Results%3A+List_No+equal+to+%271550.100%27&thumbnailViewUrlKey=link.view.search.url&helpUrl=http%3A%2F%2Fdoc.lunaimaging.com%2Fdisplay%2FV71D%2FLUNA%2BViewer%23LUNAViewer-LUNAViewer&fullTextSearchChecked=&advancedSearchUrl=http%3A%2F%2Fdo…	23.7268	83.8993	2005716	Shogolev Igor	urn:lsid:catalogueoflife.org:taxon:e7b9a837-18fd-11e5-9774-bc764e0806fb:col20150623	Dicrurus aeneus	Animalia	Chordata	Aves	Passeriformes	Dicruridae	Dicrurus	aeneus	Vieillot, 1817	ICZN	Dicrurus aeneus
ZMUA	AVSE	ZMUA_Aves	ZMUA	PreservedSpecimen	2062-1657	GR-ZMUA_Aves-2062-1657	E.T.T.E.	1			Whole animal (Stuffed)	1859	2062		GR	India	Coordinates according to: http://www.davidrumsey.com/luna/servlet/detail/RUMSEY~8~1~209897~5003705:India-?showTip=false&showTipAdvancedSearch=false&title=Search+Results%3A+List_No+equal+to+%271550.100%27&thumbnailViewUrlKey=link.view.search.url&helpUrl=http%3A%2F%2Fdoc.lunaimaging.com%2Fdisplay%2FV71D%2FLUNA%2BViewer%23LUNAViewer-LUNAViewer&fullTextSearchChecked=&advancedSearchUrl=http%3A%2F%2Fdo…	23.7268	83.8993	2005716	Shogolev Igor	urn:lsid:catalogueoflife.org:taxon:e7c75f05-18fd-11e5-9774-bc764e0806fb:col20150623	Lamprotornis chalybaeus	Animalia	Chordata	Aves	Passeriformes	Sturnidae	Lamprotornis	chalybaeus	Hemprich & Ehrenberg, 1828	ICZN	Lamprotornis chalybaeus
ZMUA	AVSE	ZMUA_Aves	ZMUA	PreservedSpecimen	2057-1652	GR-ZMUA_Aves-2057-1652	E.T.T.E.	1			Whole animal (Stuffed)	1859	2057		GR	India	Coordinates according to: http://www.davidrumsey.com/luna/servlet/detail/RUMSEY~8~1~209897~5003705:India-?showTip=false&showTipAdvancedSearch=false&title=Search+Results%3A+List_No+equal+to+%271550.100%27&thumbnailViewUrlKey=link.view.search.url&helpUrl=http%3A%2F%2Fdoc.lunaimaging.com%2Fdisplay%2FV71D%2FLUNA%2BViewer%23LUNAViewer-LUNAViewer&fullTextSearchChecked=&advancedSearchUrl=http%3A%2F%2Fdo…	23.7268	83.8993	2005716	Shogolev Igor	urn:lsid:catalogueoflife.org:taxon:e6e4ea48-18fd-11e5-9774-bc764e0806fb:col20150623	Aplonis panayensis	Animalia	Chordata	Aves	Passeriformes	Sturnidae	Aplonis	panayensis	(Scopoli, 1786)	ICZN	Aplonis panayensis
ZMUA	AVSE	ZMUA_Aves	ZMUA	PreservedSpecimen	2013-1608	GR-ZMUA_Aves-2013-1608	E.T.T.E.	1			Whole animal (Stuffed)	1859	2013		GR	Nubia	Coordinates according to: http://www.getty.edu/vow/TGNFullDisplay?find=nubia&place=&nation=&prev_page=1&english=Y&subjectid=6004345	21.1178	28.568	1273343	Shogolev Igor	urn:lsid:catalogueoflife.org:taxon:e822e258-18fd-11e5-9774-bc764e0806fb:col20150623	Lagonosticta senegala	Animalia	Chordata	Aves	Passeriformes	Estrildidae	Lagonosticta	senegala	(Linnaeus, 1766)	ICZN	Lagonosticta senegala
ZMUA	AVSE	ZMUA_Aves	ZMUA	PreservedSpecimen	830-425	GR-ZMUA_Aves-830-425	E.T.T.E.	1			Whole animal (Stuffed)	1859	830		GR	Africa (Senegambia)	Coordinates for Senegambia, according to: http://www.davidrumsey.com/luna/servlet/detail/RUMSEY~8~1~36486~1200848:Africa-?showTip=false&showTipAdvancedSearch=false&title=Search+Results%3A+List_No+equal+to+%274557.074%27&thumbnailViewUrlKey=link.view.search.url&helpUrl=http%3A%2F%2Fdoc.lunaimaging.com%2Fdisplay%2FV71D%2FLUNA%2BViewer%23LUNAViewer-LUNAViewer&fullTextSearchChecked=&advancedSearchUrl…	13.9088	-14.1676	376377	Shogolev Igor	urn:lsid:catalogueoflife.org:taxon:e86777c4-18fd-11e5-9774-bc764e0806fb:col20150623	Anastomus lamelligerus	Animalia	Chordata	Aves	Ciconiiformes	Ciconiidae	Anastomus	lamelligerus	Temminck, 1823	ICZN	Anastomus lamelligerus Temm., 1823
ZMUA	AVSE	ZMUA_Aves	ZMUA	PreservedSpecimen	2429-2024	GR-ZMUA_Aves-2429-2024	E.T.T.E.	1			Whole animal (Stuffed)	1859	2429		GR						Shogolev Igor	urn:lsid:catalogueoflife.org:taxon:03039d8b-18fe-11e5-9774-bc764e0806fb:col20150623	Chlorostilbon stenurus	Animalia	Chordata	Aves	Apodiformes	Trochilidae	Chlorostilbon	stenurus	(Cabanis & Heine, 1860)	ICZN	Chlorostilbon stenurus Canabis and Heine, 1860
ZMUA	AVSE	ZMUA_Aves	ZMUA	PreservedSpecimen	2195-1790	GR-ZMUA_Aves-2195-1790	E.T.T.E.	1			Whole animal (Stuffed)	1859	2195		GR						Shogolev Igor	urn:lsid:catalogueoflife.org:taxon:e7ba909d-18fd-11e5-9774-bc764e0806fb:col20150623	Estrilda astrild	Animalia	Chordata	Aves	Passeriformes	Estrildidae	Estrilda	astrild	(Linnaeus, 1758)	ICZN	Estrilda astrild
ZMUA	AVSE	ZMUA_Aves	ZMUA	PreservedSpecimen	2126-1721	GR-ZMUA_Aves-2126-1721	E.T.T.E.	1			Whole animal (Stuffed)	1859	2126		GR						Shogolev Igor	urn:lsid:catalogueoflife.org:taxon:e81c99de-18fd-11e5-9774-bc764e0806fb:col20150623	Chaimarrornis leucocephalus	Animalia	Chordata	Aves	Passeriformes	Muscicapidae	Chaimarrornis	leucocephalus	(Vigors, 1831)	ICZN	Chaimarrornis leucocephala (Vig.)
ZMUA	AVSE	ZMUA_Aves	ZMUA	PreservedSpecimen	2284-1879	GR-ZMUA_Aves-2284-1879	E.T.T.E.	1			Whole animal (Stuffed)	1859	2284		GR						Shogolev Igor	urn:lsid:catalogueoflife.org:taxon:e7c897a2-18fd-11e5-9774-bc764e0806fb:col20150807	Tangara vassorii	Animalia	Chordata	Aves	Passeriformes	Thraupidae	Tangara	vassorii	(Boissonneau, 1840)	ICZN	Tangara vassorii
ZMUA	AVSE	ZMUA_Aves	ZMUA	PreservedSpecimen	2191-1786	GR-ZMUA_Aves-2191-1786	E.T.T.E.	1			Whole animal (Stuffed)	1859	2191		GR						Shogolev Igor	urn:lsid:catalogueoflife.org:taxon:e7ba909d-18fd-11e5-9774-bc764e0806fb:col20150623	Estrilda astrild	Animalia	Chordata	Aves	Passeriformes	Estrildidae	Estrilda	astrild	(Linnaeus, 1758)	ICZN	Estrilda astrild
ZMUA	AVSE	ZMUA_Aves	ZMUA	PreservedSpecimen	2193-1788	GR-ZMUA_Aves-2193-1788	E.T.T.E.	1			Whole animal (Stuffed)	1859	2193		GR						Shogolev Igor	urn:lsid:catalogueoflife.org:taxon:e7bc14aa-18fd-11e5-9774-bc764e0806fb:col20150807	Vidua chalybeata	Animalia	Chordata	Aves	Passeriformes	Viduidae	Vidua	chalybeata	(Statius Muller, 1776)	ICZN	Hypochera chalybeata / Vidua chalybeata
ZMUA	AVSE	ZMUA_Aves	ZMUA	PreservedSpecimen	2398-1993	GR-ZMUA_Aves-2398-1993	E.T.T.E.; Pargadakis	1			Whole animal (Stuffed)	1859	2398	Colombia	GR	Colombia	Coordinates according to: http://bl.ocks.org/rdmpage/raw/9951904/	3.75998	-72.6178	947417	Shogolev Igor	urn:lsid:catalogueoflife.org:taxon:f6c548cc-18fd-11e5-9774-bc764e0806fb:col20150730	Metallura tyrianthina	Animalia	Chordata	Aves	Apodiformes	Trochilidae	Metallura	tyrianthina	(Loddiges, 1832)	ICZN	Metallura tyrianthina Loddiges, 1832
ZMUA	AVSE	ZMUA_Aves	ZMUA	PreservedSpecimen	730-325	GR-ZMUA_Aves-730-325	E.T.T.E.; Schrader G.	1			Whole animal (Stuffed)	1859	730		GR	S. America	Coordinates according to: http://bl.ocks.org/rdmpage/raw/9951904/	-20.7716	-58.4234	3930928	Shogolev Igor	urn:lsid:catalogueoflife.org:taxon:e8671e2e-18fd-11e5-9774-bc764e0806fb:col20150623	Dendrocygna viduata	Animalia	Chordata	Aves	Anseriformes	Anatidae	Dendrocygna	viduata	(Linnaeus, 1766)	ICZN	Dendrocygna viduata L., 1766
ZMUA	AVSE	ZMUA_Aves	ZMUA	PreservedSpecimen	1600-1195	GR-ZMUA_Aves-1600-1195	E.T.T.E.; Schrader G.	1			Whole animal (Stuffed)	1859	1600		GR	Africa	Coordinates according to: http://bl.ocks.org/rdmpage/raw/9951904/	2.31186	15.7562	4243522	Shogolev Igor	urn:lsid:catalogueoflife.org:taxon:24599d2a-18fe-11e5-9774-bc764e0806fb:col20150730	Merops nubicus nubicus	Animalia	Chordata	Aves	Coraciiformes	Meropidae	Merops	nubicus	Gmelin, 1788	ICZN	Merops nubicus nubicus Gmelin, 1788
ZMUA	AVSE	ZMUA_Aves	ZMUA	PreservedSpecimen	1857-1452	GR-ZMUA_Aves-1857-1452	E.T.T.E.; Schrader G.	1			Whole animal (Stuffed)	1859	1857		GR	India	Coordinates according to: http://www.davidrumsey.com/luna/servlet/detail/RUMSEY~8~1~209897~5003705:India-?showTip=false&showTipAdvancedSearch=false&title=Search+Results%3A+List_No+equal+to+%271550.100%27&thumbnailViewUrlKey=link.view.search.url&helpUrl=http%3A%2F%2Fdoc.lunaimaging.com%2Fdisplay%2FV71D%2FLUNA%2BViewer%23LUNAViewer-LUNAViewer&fullTextSearchChecked=&advancedSearchUrl=http%3A%2F%2Fdo…	23.7268	83.8993	2005716	Shogolev Igor	urn:lsid:catalogueoflife.org:taxon:e7b990de-18fd-11e5-9774-bc764e0806fb:col20150807	Oriolus xanthornus	Animalia	Chordata	Aves	Passeriformes	Oriolidae	Oriolus	xanthornus	(Linnaeus, 1758)	ICZN	Oriolus xanthornus
ZMUA	AVSE	ZMUA_Aves	ZMUA	PreservedSpecimen	1283-878	GR-ZMUA_Aves-1283-878	E.T.T.E.; Schrader G.	1			Whole animal (Stuffed)	1859	1283		GR	India	Coordinates according to: http://www.davidrumsey.com/luna/servlet/detail/RUMSEY~8~1~209897~5003705:India-?showTip=false&showTipAdvancedSearch=false&title=Search+Results%3A+List_No+equal+to+%271550.100%27&thumbnailViewUrlKey=link.view.search.url&helpUrl=http%3A%2F%2Fdoc.lunaimaging.com%2Fdisplay%2FV71D%2FLUNA%2BViewer%23LUNAViewer-LUNAViewer&fullTextSearchChecked=&advancedSearchUrl=http%3A%2F%2Fdo…	23.7268	83.8993	2005716	Shogolev Igor	urn:lsid:catalogueoflife.org:taxon:fb5f99ac-18fd-11e5-9774-bc764e0806fb:col20150807	Psittacula krameri	Animalia	Chordata	Aves	Psittaciformes	Psittacidae	Psittacula	krameri	(Scopoli, 1769)	ICZN	Psittacula krameri Scopoli, 1769
ZMUA	AVSE	ZMUA_Aves	ZMUA	PreservedSpecimen	890-485	GR-ZMUA_Aves-890-485	E.T.T.E.; Schrader G.	1			Whole animal (Stuffed)	1859	890	India	GR	India - Bengal	Coordinates according to: https://en.wikipedia.org/wiki/Bengal	23.8795	89.8682	494105	Shogolev Igor	urn:lsid:catalogueoflife.org:taxon:fc9462db-18fd-11e5-9774-bc764e0806fb:col20150807	Treron sphenurus	Animalia	Chordata	Aves	Columbiformes	Columbidae	Treron	sphenurus	(Vigors, 1832)	ICZN	Treron sphenura Vigors, 1832
ZMUA	AVSE	ZMUA_Aves	ZMUA	PreservedSpecimen	861-456	GR-ZMUA_Aves-861-456	E.T.T.E.; Schrader G.	1			Whole animal (Stuffed)	1859	861	India	GR	N. India	Coordintes for the northern part of India	23.2502	78.9488	1136820	Shogolev Igor	urn:lsid:catalogueoflife.org:taxon:233fabf3-18fe-11e5-9774-bc764e0806fb:col20150807	Treron phoenicopterus phoenicopterus	Animalia	Chordata	Aves	Columbiformes	Columbidae	Treron	phoenicopterus	(Latham, 1790)	ICZN	Treron phoenicoptera phoenicoptera
ZMUA	AVSE	ZMUA_Aves	ZMUA	PreservedSpecimen	1342-937	GR-ZMUA_Aves-1342-937	E.T.T.E.; Schrader G.	1			Whole animal (Stuffed)	1859	1342		GR	S. Africa	S. symbol may mean either South or Southern. Since it is not clarified, Southern Africa is selected. Southern Africa according to: https://books.google.gr/books?id=-Uw5AQAAIAAJ&printsec=frontcover&dq=Southern+Africa:+A+Geography+and+Natural+History+of+the+Country,+Colonies,+and+Inhabitants+from+the+Cape+of+Good+Hope+to+Angola.&hl=en&sa=X&ved=0CB8Q6AEwAGoVChMI56v3rb7TxwIVigYsCh09Mwe9#v=onepage&q=S…	-1.28817	17.0059	4023989	Shogolev Igor	urn:lsid:catalogueoflife.org:taxon:e834ee73-18fd-11e5-9774-bc764e0806fb:col20150807	Tchagra senegalus	Animalia	Chordata	Aves	Passeriformes	Malaconotidae	Tchagra	senegalus	(Linnaeus, 1766)	ICZN	Tchagra senegala
ZMUA	AVSE	ZMUA_Aves	ZMUA	PreservedSpecimen	769-364	GR-ZMUA_Aves-769-364	E.T.T.E.; Schrader G.	1			Whole animal (Stuffed)	1859	769		GR						Shogolev Igor	urn:lsid:catalogueoflife.org:taxon:e867be3c-18fd-11e5-9774-bc764e0806fb:col20150623	Ardea melanocephala	Animalia	Chordata	Aves	Pelecaniformes	Ardeidae	Ardea	melanocephala	Children & Vigors, 1826	ICZN	Ardea melanocephala Anon., 1826
ZMUA	AVSE	ZMUA_Aves	ZMUA	PreservedSpecimen	967-562	GR-ZMUA_Aves-967-562	E.T.T.E.; Schrader G.	1			Whole animal (Stuffed)	1859	967		GR						Shogolev Igor	urn:lsid:catalogueoflife.org:taxon:ee22864c-18fd-11e5-9774-bc764e0806fb:col20150807	Tragopan melanocephalus	Animalia	Chordata	Aves	Galliformes	Phasianidae	Tragopan	melanocephalus	(J. E. Gray, 1829)	ICZN	Tragopan melanocephalus J. E. Gray, 1829
ZMUA	AVSE	ZMUA_Aves	ZMUA	PreservedSpecimen	723-318	GR-ZMUA_Aves-723-318	E.T.T.E.; Schrader G.	1			Whole animal (Stuffed)	1859	723		GR						Shogolev Igor	urn:lsid:catalogueoflife.org:taxon:ede582ca-18fd-11e5-9774-bc764e0806fb:col20150807	Sarkidiornis melanotos	Animalia	Chordata	Aves	Anseriformes	Anatidae	Sarkidiornis	melanotos	(Pennant, 1769)	ICZN	Sarkidiornis melanotos Penn.
ZMUA	AVSE	ZMUA_Aves	ZMUA	PreservedSpecimen	1476-1071	GR-ZMUA_Aves-1476-1071	E.T.T.E.; Villard C. d.	1	M	adult	Whole animal (Stuffed)	1859	1476	Brazil	GR	Brazil	Coordinates according to: http://bl.ocks.org/rdmpage/raw/9951904/	-12.607	-54.423	2281819	Shogolev Igor	urn:lsid:catalogueoflife.org:taxon:e81af513-18fd-11e5-9774-bc764e0806fb:col20150623	Colonia colonus	Animalia	Chordata	Aves	Passeriformes	Tyrannidae	Colonia	colonus	(Vieillot, 1818)	ICZN	Colonia colonus
ZMUA	AVSE	ZMUA_Aves	ZMUA	PreservedSpecimen	1442-1037	GR-ZMUA_Aves-1442-1037	E.T.T.E.; Villard C. d.	1			Whole animal (Stuffed)	1859	1442	Brazil	GR	Brazil	Coordinates according to: http://bl.ocks.org/rdmpage/raw/9951904/	-12.607	-54.423	2281819	Shogolev Igor	urn:lsid:catalogueoflife.org:taxon:e6eee47f-18fd-11e5-9774-bc764e0806fb:col20150807	Phibalura flavirostris	Animalia	Chordata	Aves	Passeriformes	Cotingidae	Phibalura	flavirostris	Vieillot, 1816	ICZN	Phibalura flavirostris
ZMUA	AVSE	ZMUA_Aves	ZMUA	PreservedSpecimen	1611-1206	GR-ZMUA_Aves-1611-1206	E.T.T.E.; Villard C. d.	1			Whole animal (Stuffed)	1859	1611	Brazil	GR	Brazil	Coordinates according to: http://bl.ocks.org/rdmpage/raw/9951904/	-12.607	-54.423	2281819	Shogolev Igor	urn:lsid:catalogueoflife.org:taxon:e8200e2c-18fd-11e5-9774-bc764e0806fb:col20150730	Megarynchus pitangua	Animalia	Chordata	Aves	Passeriformes	Tyrannidae	Megarynchus	pitangua	(Linnaeus, 1766)	ICZN	Megarhynchus pitangua
ZMUA	AVSE	ZMUA_Aves	ZMUA	PreservedSpecimen	2504-2099	GR-ZMUA_Aves-2504-2099	E.T.T.E.; Villard C. d.	1			Whole animal (Stuffed)	1859	2504	Mexico	GR	Mexico	Coordinates according to: http://bl.ocks.org/rdmpage/raw/9951904/	23.9501	-102.947	1738309	Shogolev Igor	urn:lsid:catalogueoflife.org:taxon:f926d556-18fd-11e5-9774-bc764e0806fb:col20150623	Dendroica magnolia	Animalia	Chordata	Aves	Passeriformes	Parulidae	Dendroica	magnolia	(A. Wilson, 1811)	ICZN	Dendroica magnolia
ZMUA	AVSE	ZMUA_Aves	ZMUA	PreservedSpecimen	2432-2027	GR-ZMUA_Aves-2432-2027	E.T.T.E.; Villard C. d.	1			Whole animal (Stuffed)	1859	2432	Brazil	GR	Brazil	Coordinates according to: http://bl.ocks.org/rdmpage/raw/9951904/	-12.607	-54.423	2281819	Shogolev Igor	urn:lsid:catalogueoflife.org:taxon:ee13d6a5-18fd-11e5-9774-bc764e0806fb:col20150623	Anthracothorax viridis	Animalia	Chordata	Aves	Apodiformes	Trochilidae	Anthracothorax	viridis	(Audebert & Vieillot, 1801)	ICZN	Anthracothorax viridis Vieillot, 1801
ZMUA	AVSE	ZMUA_Aves	ZMUA	PreservedSpecimen	2431-2026	GR-ZMUA_Aves-2431-2026	E.T.T.E.; Villard C. d.	1			Whole animal (Stuffed)	1859	2431		GR						Shogolev Igor	urn:lsid:catalogueoflife.org:taxon:f711af57-18fd-11e5-9774-bc764e0806fb:col20150623	Clytolaema rubricauda	Animalia	Chordata	Aves	Apodiformes	Trochilidae	Clytolaema	rubricauda	(Boddaert, 1783)	ICZN	Clytolaema rubricauda Boddaert, 1783
ZMUA	AVSE	ZMUA_Aves	ZMUA	PreservedSpecimen	2439-2034	GR-ZMUA_Aves-2439-2034	E.T.T.E.; Villard C. d.	1			Whole animal (Stuffed)	1859	2439		GR						Shogolev Igor	urn:lsid:catalogueoflife.org:taxon:0302d2cb-18fe-11e5-9774-bc764e0806fb:col20150623	Eriocnemis vestita	Animalia	Chordata	Aves	Apodiformes	Trochilidae	Eriocnemis	vestita	(Lesson, 1839)	ICZN	Eriocnemis vestitus Lesson 1838
ZMUA	AVSE	ZMUA_Aves	ZMUA	Occurrence	D12-2905	GR-ZMUA_Aves-D12-2905		1			Specimen unavailable	1859	D12	Brazil	GR	Brazil	Coordinates according to: http://bl.ocks.org/rdmpage/raw/9951904/	-12.607	-54.423	2281819		urn:lsid:catalogueoflife.org:taxon:e7ca74cb-18fd-11e5-9774-bc764e0806fb:col20150807	Tangara desmaresti	Animalia	Chordata	Aves	Passeriformes	Thraupidae	Tangara	desmaresti	(Vieillot, 1819)	ICZN	Tanagra (Calliste) thoracica
ZMUA	AVSE	ZMUA_Aves	ZMUA	Occurrence	D18-2911	GR-ZMUA_Aves-D18-2911		1			Specimen unavailable	1859	D18	Mexico	GR	Mexico	Coordinates according to: http://bl.ocks.org/rdmpage/raw/9951904/	23.9501	-102.947	1738309		urn:lsid:catalogueoflife.org:taxon:e625c13a-18fd-11e5-9774-bc764e0806fb:col20150623	Icterus galbula	Animalia	Chordata	Aves	Passeriformes	Icteridae	Icterus	galbula	(Linnaeus, 1758)	ICZN	Icterus vulgaris baltimore
ZMUA	AVSE	ZMUA_Aves	ZMUA	Occurrence	B54-2886	GR-ZMUA_Aves-B54-2886		1	M	adult	Specimen unavailable	1859	B54		GR	Lapland	Coordinates according to: http://www.getty.edu/vow/TGNFullDisplay?find=lapland&place=&nation=&prev_page=1&english=Y&subjectid=7010028	68.2383	25.2876	390067		urn:lsid:catalogueoflife.org:taxon:f3aba72c-ac8e-11e3-805d-020044200006:col20150401	Surnia ulula	Animalia	Chordata	Aves	Strigiformes	Strigidae	Surnia	ulula	(Linnaeus, 1758)	ICZN	Strix (Ulula) funerea nisoria
ZMUA	AVSE	ZMUA_Aves	ZMUA	Occurrence	D26-2920	GR-ZMUA_Aves-D26-2920		1			Specimen unavailable	1859	D26		GR									Animalia	Chordata	Aves						ICZN
ZMUA	AVSE	ZMUA_Aves	ZMUA	PreservedSpecimen	419-14	GR-ZMUA_Aves-419-14		1	M	adult	Whole animal (Stuffed)	1859	419	Greece	GR	Attica	Coordinates according to: http://bl.ocks.org/rdmpage/raw/9951904/	37.9789	23.6696	50004	Shogolev Igor	urn:lsid:catalogueoflife.org:taxon:f372b1db-18fd-11e5-9774-bc764e0806fb:col20150623	Accipiter nisus	Animalia	Chordata	Aves	Accipitriformes	Accipitridae	Accipiter	nisus	(Linnaeus, 1758)	ICZN	Accipiter nisus L.
ZMUA	AVSE	ZMUA_Aves	ZMUA	Occurrence	D39-2934	GR-ZMUA_Aves-D39-2934		1	M	adult	Specimen unavailable	1859	D39		GR							urn:lsid:catalogueoflife.org:taxon:e867095c-18fd-11e5-9774-bc764e0806fb:col20150623	Anas acuta	Animalia	Chordata	Aves	Anseriformes	Anatidae	Anas	acuta	Linnaeus, 1758	ICZN	Anas acuta
ZMUA	AVSE	ZMUA_Aves	ZMUA	PreservedSpecimen	573-168	GR-ZMUA_Aves-573-168		1	M	adult	Whole animal (Stuffed)	1860	573	Greece	GR	Attica	Coordinates according to: http://bl.ocks.org/rdmpage/raw/9951904/	37.9789	23.6696	50004	Shogolev Igor	urn:lsid:catalogueoflife.org:taxon:e855376f-18fd-11e5-9774-bc764e0806fb:col20150623	Falco tinnunculus	Animalia	Chordata	Aves	Falconiformes	Falconidae	Falco	tinnunculus	Linnaeus, 1758	ICZN	Falco tinnunculus
ZMUA	AVSE	ZMUA_Aves	ZMUA	PreservedSpecimen	453-48	GR-ZMUA_Aves-453-48	Borghini T.	1	F	adult	Whole animal (Stuffed)	1860	453	Greece	GR	Attica	Coordinates according to: http://bl.ocks.org/rdmpage/raw/9951904/	37.9789	23.6696	50004	Shogolev Igor	urn:lsid:catalogueoflife.org:taxon:eded78f6-18fd-11e5-9774-bc764e0806fb:col20150623	Larus cachinnans	Animalia	Chordata	Aves	Charadriiformes	Laridae	Larus	cachinnans	Pallas, 1811	ICZN	Larus cachinnans (Pall.), 1811
ZMUA	AVSE	ZMUA_Aves	ZMUA	PreservedSpecimen	617-212	GR-ZMUA_Aves-617-212	E.T.T.E.	1	M	adult	Whole animal (Stuffed)	1860	617	Greece	GR	Attica	Coordinates according to: http://bl.ocks.org/rdmpage/raw/9951904/	37.9789	23.6696	50004	Shogolev Igor	urn:lsid:catalogueoflife.org:taxon:e8676941-18fd-11e5-9774-bc764e0806fb:col20150807	Plegadis falcinellus	Animalia	Chordata	Aves	Pelecaniformes	Threskiornithidae	Plegadis	falcinellus	(Linnaeus, 1766)	ICZN	Plegadis falcinellus Linnaeus
ZMUA	AVSE	ZMUA_Aves	ZMUA	PreservedSpecimen	2458-2053	GR-ZMUA_Aves-2458-2053	Ninni A.	1	F	adult	Whole animal (Stuffed)	1860	2458	Italy	GR	Italy (Lonizo)	Location Lonizo was not found. Coordinates for Italy	42.2884	13.0518	630876	Shogolev Igor	urn:lsid:catalogueoflife.org:taxon:ee19626c-18fd-11e5-9774-bc764e0806fb:col20150807	Porzana parva	Animalia	Chordata	Aves	Gruiformes	Rallidae	Porzana	parva	(Scopoli, 1769)	ICZN	Porzana parva
ZMUA	AVSE	ZMUA_Aves	ZMUA	PreservedSpecimen	504-99	GR-ZMUA_Aves-504-99	Schrader G.	1	F		Whole animal (Stuffed)	1860	504	Greece	GR	Taygetus	Coordinates according to: http://bl.ocks.org/rdmpage/raw/9951904/	37.0123	22.3522	34484	Shogolev Igor	urn:lsid:catalogueoflife.org:taxon:e7cbaf8f-18fd-11e5-9774-bc764e0806fb:col20150807	Oenanthe hispanica	Animalia	Chordata	Aves	Passeriformes	Muscicapidae	Oenanthe	hispanica	(Linnaeus, 1758)	ICZN	Oenanthe hispanica
ZMUA	AVSE	ZMUA_Aves	ZMUA	PreservedSpecimen	1501-1096	GR-ZMUA_Aves-1501-1096	Schrader G.	1	F		Whole animal (Stuffed)	1860	1501	Greece	GR	Taygetus	Coordinates according to: http://bl.ocks.org/rdmpage/raw/9951904/	37.0123	22.3522	34484	Shogolev Igor	urn:lsid:catalogueoflife.org:taxon:e7e4e4a8-18fd-11e5-9774-bc764e0806fb:col20150623	Loxia curvirostra	Animalia	Chordata	Aves	Passeriformes	Fringillidae	Loxia	curvirostra	Linnaeus, 1758	ICZN	Loxia curvirostra
ZMUA	AVSE	ZMUA_Aves	ZMUA	PreservedSpecimen	2888-2483	GR-ZMUA_Aves-2888-2483	Schrader G.	1	M	adult	Whole animal (Stuffed)	1860	2888		GR	S. America	Coordinates according to: http://bl.ocks.org/rdmpage/raw/9951904/	-20.7716	-58.4234	3930928	Shogolev Igor	urn:lsid:catalogueoflife.org:taxon:219c48a5-18fe-11e5-9774-bc764e0806fb:col20150623	Amazona aestiva xanthopteryx	Animalia	Chordata	Aves	Psittaciformes	Psittacidae	Amazona	aestiva	(Berlepsch, 1896)	ICZN	Amazona aestiva ssp xanthopteryx
ZMUA	AVSE	ZMUA_Aves	ZMUA	PreservedSpecimen	1419-1014	GR-ZMUA_Aves-1419-1014	Spielter T. W.	1			Whole animal (Stuffed)	1860	1419		GR	India	Coordinates according to: http://www.davidrumsey.com/luna/servlet/detail/RUMSEY~8~1~209897~5003705:India-?showTip=false&showTipAdvancedSearch=false&title=Search+Results%3A+List_No+equal+to+%271550.100%27&thumbnailViewUrlKey=link.view.search.url&helpUrl=http%3A%2F%2Fdoc.lunaimaging.com%2Fdisplay%2FV71D%2FLUNA%2BViewer%23LUNAViewer-LUNAViewer&fullTextSearchChecked=&advancedSearchUrl=http%3A%2F%2Fdo…	23.7268	83.8993	2005716	Shogolev Igor	urn:lsid:catalogueoflife.org:taxon:e824b7f2-18fd-11e5-9774-bc764e0806fb:col20150623	Calyptomena viridis	Animalia	Chordata	Aves	Passeriformes	Eurylaimidae	Calyptomena	viridis	Raffles, 1822	ICZN	Calyptomena viridis
ZMUA	AVSE	ZMUA_Aves	ZMUA	PreservedSpecimen	1869-1464	GR-ZMUA_Aves-1869-1464	Spielter T. W.	1			Whole animal (Stuffed)	1860	1869		GR	India	Coordinates according to: http://www.davidrumsey.com/luna/servlet/detail/RUMSEY~8~1~209897~5003705:India-?showTip=false&showTipAdvancedSearch=false&title=Search+Results%3A+List_No+equal+to+%271550.100%27&thumbnailViewUrlKey=link.view.search.url&helpUrl=http%3A%2F%2Fdoc.lunaimaging.com%2Fdisplay%2FV71D%2FLUNA%2BViewer%23LUNAViewer-LUNAViewer&fullTextSearchChecked=&advancedSearchUrl=http%3A%2F%2Fdo…	23.7268	83.8993	2005716	Shogolev Igor	urn:lsid:catalogueoflife.org:taxon:e7b97e24-18fd-11e5-9774-bc764e0806fb:col20150623	Gracula religiosa	Animalia	Chordata	Aves	Passeriformes	Sturnidae	Gracula	religiosa	Linnaeus, 1758	ICZN	Gracula religiosa
ZMUA	AVSE	ZMUA_Aves	ZMUA	PreservedSpecimen	1081-676	GR-ZMUA_Aves-1081-676	Spielter T. W.	1	M	adult	Whole animal (Stuffed)	1860	1081		GR	India	Coordinates according to: http://www.davidrumsey.com/luna/servlet/detail/RUMSEY~8~1~209897~5003705:India-?showTip=false&showTipAdvancedSearch=false&title=Search+Results%3A+List_No+equal+to+%271550.100%27&thumbnailViewUrlKey=link.view.search.url&helpUrl=http%3A%2F%2Fdoc.lunaimaging.com%2Fdisplay%2FV71D%2FLUNA%2BViewer%23LUNAViewer-LUNAViewer&fullTextSearchChecked=&advancedSearchUrl=http%3A%2F%2Fdo…	23.7268	83.8993	2005716	Shogolev Igor	urn:lsid:catalogueoflife.org:taxon:e85bb9fc-18fd-11e5-9774-bc764e0806fb:col20150730	Microhierax fringillarius	Animalia	Chordata	Aves	Falconiformes	Falconidae	Microhierax	fringillarius	(Drapiez, 1824)	ICZN	Microhierax fringillarius Drapiez 1824
ZMUA	AVSE	ZMUA_Aves	ZMUA	PreservedSpecimen	1082-677	GR-ZMUA_Aves-1082-677	Spielter T. W.	1			Whole animal (Stuffed)	1860	1082		GR	India	Coordinates according to: http://www.davidrumsey.com/luna/servlet/detail/RUMSEY~8~1~209897~5003705:India-?showTip=false&showTipAdvancedSearch=false&title=Search+Results%3A+List_No+equal+to+%271550.100%27&thumbnailViewUrlKey=link.view.search.url&helpUrl=http%3A%2F%2Fdoc.lunaimaging.com%2Fdisplay%2FV71D%2FLUNA%2BViewer%23LUNAViewer-LUNAViewer&fullTextSearchChecked=&advancedSearchUrl=http%3A%2F%2Fdo…	23.7268	83.8993	2005716	Shogolev Igor	urn:lsid:catalogueoflife.org:taxon:e85bb9fc-18fd-11e5-9774-bc764e0806fb:col20150730	Microhierax fringillarius	Animalia	Chordata	Aves	Falconiformes	Falconidae	Microhierax	fringillarius	(Drapiez, 1824)	ICZN	Microhierax fringillarius Drapiez 1824
ZMUA	AVSE	ZMUA_Aves	ZMUA	PreservedSpecimen	1231-826	GR-ZMUA_Aves-1231-826	Spielter T. W.	1			Whole animal (Stuffed)	1860	1231		GR	India	Coordinates according to: http://www.davidrumsey.com/luna/servlet/detail/RUMSEY~8~1~209897~5003705:India-?showTip=false&showTipAdvancedSearch=false&title=Search+Results%3A+List_No+equal+to+%271550.100%27&thumbnailViewUrlKey=link.view.search.url&helpUrl=http%3A%2F%2Fdoc.lunaimaging.com%2Fdisplay%2FV71D%2FLUNA%2BViewer%23LUNAViewer-LUNAViewer&fullTextSearchChecked=&advancedSearchUrl=http%3A%2F%2Fdo…	23.7268	83.8993	2005716	Shogolev Igor	urn:lsid:catalogueoflife.org:taxon:ededccc9-18fd-11e5-9774-bc764e0806fb:col20150730	Meiglyptes tristis	Animalia	Chordata	Aves	Piciformes	Picidae	Meiglyptes	tristis	(Horsfield, 1821)	ICZN	Meiglyptes tristi
ZMUA	AVSE	ZMUA_Aves	ZMUA	PreservedSpecimen	1153-748	GR-ZMUA_Aves-1153-748	Spielter T. W.	1	F	adult	Whole animal (Stuffed)	1860	1153		GR	India	Coordinates according to: http://www.davidrumsey.com/luna/servlet/detail/RUMSEY~8~1~209897~5003705:India-?showTip=false&showTipAdvancedSearch=false&title=Search+Results%3A+List_No+equal+to+%271550.100%27&thumbnailViewUrlKey=link.view.search.url&helpUrl=http%3A%2F%2Fdoc.lunaimaging.com%2Fdisplay%2FV71D%2FLUNA%2BViewer%23LUNAViewer-LUNAViewer&fullTextSearchChecked=&advancedSearchUrl=http%3A%2F%2Fdo…	23.7268	83.8993	2005716	Shogolev Igor	urn:lsid:catalogueoflife.org:taxon:ededf1b5-18fd-11e5-9774-bc764e0806fb:col20150807	Picus mentalis	Animalia	Chordata	Aves	Piciformes	Picidae	Picus	mentalis	Temminck, 1826	ICZN	Picus mentalis
ZMUA	AVSE	ZMUA_Aves	ZMUA	PreservedSpecimen	1285-880	GR-ZMUA_Aves-1285-880	Spielter T. W.	1			Whole animal (Stuffed)	1860	1285		GR	India	Coordinates according to: http://www.davidrumsey.com/luna/servlet/detail/RUMSEY~8~1~209897~5003705:India-?showTip=false&showTipAdvancedSearch=false&title=Search+Results%3A+List_No+equal+to+%271550.100%27&thumbnailViewUrlKey=link.view.search.url&helpUrl=http%3A%2F%2Fdoc.lunaimaging.com%2Fdisplay%2FV71D%2FLUNA%2BViewer%23LUNAViewer-LUNAViewer&fullTextSearchChecked=&advancedSearchUrl=http%3A%2F%2Fdo…	23.7268	83.8993	2005716	Shogolev Igor	urn:lsid:catalogueoflife.org:taxon:fb5faa22-18fd-11e5-9774-bc764e0806fb:col20150623	Loriculus galgulus	Animalia	Chordata	Aves	Psittaciformes	Psittacidae	Loriculus	galgulus	(Linnaeus, 1758)	ICZN	Loriculus galgulus L., 1758
ZMUA	AVSE	ZMUA_Aves	ZMUA	PreservedSpecimen	2035-1630	GR-ZMUA_Aves-2035-1630	Spielter T. W.	1		adult	Whole animal (Stuffed)	1860	2035		GR	India	Coordinates according to: http://www.davidrumsey.com/luna/servlet/detail/RUMSEY~8~1~209897~5003705:India-?showTip=false&showTipAdvancedSearch=false&title=Search+Results%3A+List_No+equal+to+%271550.100%27&thumbnailViewUrlKey=link.view.search.url&helpUrl=http%3A%2F%2Fdoc.lunaimaging.com%2Fdisplay%2FV71D%2FLUNA%2BViewer%23LUNAViewer-LUNAViewer&fullTextSearchChecked=&advancedSearchUrl=http%3A%2F%2Fdo…	23.7268	83.8993	2005716	Shogolev Igor	urn:lsid:catalogueoflife.org:taxon:ee213729-18fd-11e5-9774-bc764e0806fb:col20150623	Cuculus clamosus	Animalia	Chordata	Aves	Cuculiformes	Cuculidae	Cuculus	clamosus	Latham, 1802	ICZN	Cuculus clamosus Latham, 1801
ZMUA	AVSE	ZMUA_Aves	ZMUA	PreservedSpecimen	1323-918	GR-ZMUA_Aves-1323-918	Spielter T. W.	1			Whole animal (Stuffed)	1860	1323		GR	India	Coordinates according to: http://www.davidrumsey.com/luna/servlet/detail/RUMSEY~8~1~209897~5003705:India-?showTip=false&showTipAdvancedSearch=false&title=Search+Results%3A+List_No+equal+to+%271550.100%27&thumbnailViewUrlKey=link.view.search.url&helpUrl=http%3A%2F%2Fdoc.lunaimaging.com%2Fdisplay%2FV71D%2FLUNA%2BViewer%23LUNAViewer-LUNAViewer&fullTextSearchChecked=&advancedSearchUrl=http%3A%2F%2Fdo…	23.7268	83.8993	2005716	Shogolev Igor	urn:lsid:catalogueoflife.org:taxon:f18b6a02-18fd-11e5-9774-bc764e0806fb:col20150807	Rhinortha chlorophaea	Animalia	Chordata	Aves	Cuculiformes	Cuculidae	Rhinortha	chlorophaea	(Raffles, 1822)	ICZN	Phaenicophaeus chlorophaeus Raffles, 1822
ZMUA	AVSE	ZMUA_Aves	ZMUA	PreservedSpecimen	2039-1634	GR-ZMUA_Aves-2039-1634	Spielter T. W.	1			Whole animal (Stuffed)	1860	2039		GR	India	Coordinates according to: http://www.davidrumsey.com/luna/servlet/detail/RUMSEY~8~1~209897~5003705:India-?showTip=false&showTipAdvancedSearch=false&title=Search+Results%3A+List_No+equal+to+%271550.100%27&thumbnailViewUrlKey=link.view.search.url&helpUrl=http%3A%2F%2Fdoc.lunaimaging.com%2Fdisplay%2FV71D%2FLUNA%2BViewer%23LUNAViewer-LUNAViewer&fullTextSearchChecked=&advancedSearchUrl=http%3A%2F%2Fdo…	23.7268	83.8993	2005716	Shogolev Igor	urn:lsid:catalogueoflife.org:taxon:e7b0f142-18fd-11e5-9774-bc764e0806fb:col20150623	Dicrurus paradiseus	Animalia	Chordata	Aves	Passeriformes	Dicruridae	Dicrurus	paradiseus	(Linnaeus, 1766)	ICZN	Dicrurus paradiseus
ZMUA	AVSE	ZMUA_Aves	ZMUA	PreservedSpecimen	2206-1801	GR-ZMUA_Aves-2206-1801	Spielter T. W.	1			Whole animal (Stuffed)	1860	2206		GR	India	Coordinates according to: http://www.davidrumsey.com/luna/servlet/detail/RUMSEY~8~1~209897~5003705:India-?showTip=false&showTipAdvancedSearch=false&title=Search+Results%3A+List_No+equal+to+%271550.100%27&thumbnailViewUrlKey=link.view.search.url&helpUrl=http%3A%2F%2Fdoc.lunaimaging.com%2Fdisplay%2FV71D%2FLUNA%2BViewer%23LUNAViewer-LUNAViewer&fullTextSearchChecked=&advancedSearchUrl=http%3A%2F%2Fdo…	23.7268	83.8993	2005716	Shogolev Igor	urn:lsid:catalogueoflife.org:taxon:e8229a30-18fd-11e5-9774-bc764e0806fb:col20150623	Irena puella	Animalia	Chordata	Aves	Passeriformes	Irenidae	Irena	puella	(Latham, 1790)	ICZN	Irena puella
ZMUA	AVSE	ZMUA_Aves	ZMUA	PreservedSpecimen	1316-911	GR-ZMUA_Aves-1316-911	Spielter T. W.	1			Whole animal (Stuffed)	1860	1316		GR	India	Coordinates according to: http://www.davidrumsey.com/luna/servlet/detail/RUMSEY~8~1~209897~5003705:India-?showTip=false&showTipAdvancedSearch=false&title=Search+Results%3A+List_No+equal+to+%271550.100%27&thumbnailViewUrlKey=link.view.search.url&helpUrl=http%3A%2F%2Fdoc.lunaimaging.com%2Fdisplay%2FV71D%2FLUNA%2BViewer%23LUNAViewer-LUNAViewer&fullTextSearchChecked=&advancedSearchUrl=http%3A%2F%2Fdo…	23.7268	83.8993	2005716	Shogolev Igor	urn:lsid:catalogueoflife.org:taxon:ee1b7233-18fd-11e5-9774-bc764e0806fb:col20150807	Psittinus cyanurus	Animalia	Chordata	Aves	Psittaciformes	Psittacidae	Psittinus	cyanurus	(J. R. Forster, 1795)	ICZN	Psittinus cyanurus J. R. Forster, 1795
ZMUA	AVSE	ZMUA_Aves	ZMUA	PreservedSpecimen	1317-912	GR-ZMUA_Aves-1317-912	Spielter T. W.	1			Whole animal (Stuffed)	1860	1317		GR	India	Coordinates according to: http://www.davidrumsey.com/luna/servlet/detail/RUMSEY~8~1~209897~5003705:India-?showTip=false&showTipAdvancedSearch=false&title=Search+Results%3A+List_No+equal+to+%271550.100%27&thumbnailViewUrlKey=link.view.search.url&helpUrl=http%3A%2F%2Fdoc.lunaimaging.com%2Fdisplay%2FV71D%2FLUNA%2BViewer%23LUNAViewer-LUNAViewer&fullTextSearchChecked=&advancedSearchUrl=http%3A%2F%2Fdo…	23.7268	83.8993	2005716	Shogolev Igor	urn:lsid:catalogueoflife.org:taxon:ee1b7233-18fd-11e5-9774-bc764e0806fb:col20150807	Psittinus cyanurus	Animalia	Chordata	Aves	Psittaciformes	Psittacidae	Psittinus	cyanurus	(J. R. Forster, 1795)	ICZN	Psittinus cyanurus J. R. Forster, 1795
ZMUA	AVSE	ZMUA_Aves	ZMUA	PreservedSpecimen	1306-901	GR-ZMUA_Aves-1306-901	Spielter T. W.	1			Whole animal (Stuffed)	1860	1306		GR	India	Coordinates according to: http://www.davidrumsey.com/luna/servlet/detail/RUMSEY~8~1~209897~5003705:India-?showTip=false&showTipAdvancedSearch=false&title=Search+Results%3A+List_No+equal+to+%271550.100%27&thumbnailViewUrlKey=link.view.search.url&helpUrl=http%3A%2F%2Fdoc.lunaimaging.com%2Fdisplay%2FV71D%2FLUNA%2BViewer%23LUNAViewer-LUNAViewer&fullTextSearchChecked=&advancedSearchUrl=http%3A%2F%2Fdo…	23.7268	83.8993	2005716	Shogolev Igor	urn:lsid:catalogueoflife.org:taxon:22f0ca22-18fe-11e5-9774-bc764e0806fb:col20150807	Psittinus cyanurus cyanurus	Animalia	Chordata	Aves	Psittaciformes	Psittacidae	Psittinus	cyanurus	(J. R. Forster, 1795)	ICZN	Psittinurus cyanurus cyanurus J. R. Forster, 1795
ZMUA	AVSE	ZMUA_Aves	ZMUA	PreservedSpecimen	1151-746	GR-ZMUA_Aves-1151-746	Spielter T. W.	1		adult	Whole animal (Stuffed)	1860	1151		GR	India	Coordinates according to: http://www.davidrumsey.com/luna/servlet/detail/RUMSEY~8~1~209897~5003705:India-?showTip=false&showTipAdvancedSearch=false&title=Search+Results%3A+List_No+equal+to+%271550.100%27&thumbnailViewUrlKey=link.view.search.url&helpUrl=http%3A%2F%2Fdoc.lunaimaging.com%2Fdisplay%2FV71D%2FLUNA%2BViewer%23LUNAViewer-LUNAViewer&fullTextSearchChecked=&advancedSearchUrl=http%3A%2F%2Fdo…	23.7268	83.8993	2005716	Shogolev Igor	urn:lsid:catalogueoflife.org:taxon:edc6f779-18fd-11e5-9774-bc764e0806fb:col20150623	Buceros rhinoceros	Animalia	Chordata	Aves	Bucerotiformes	Bucerotidae	Buceros	rhinoceros	Linnaeus, 1758	ICZN	Buceros rhinoceros L. 1858
ZMUA	AVSE	ZMUA_Aves	ZMUA	PreservedSpecimen	1425-1020	GR-ZMUA_Aves-1425-1020	Spielter T. W.	1			Whole animal (Stuffed)	1860	1425	India	GR	India Or.	Coordninates for India	23.7268	83.8993	2005716	Shogolev Igor	urn:lsid:catalogueoflife.org:taxon:e7d3a883-18fd-11e5-9774-bc764e0806fb:col20150623	Cymbirhynchus macrorhynchos	Animalia	Chordata	Aves	Passeriformes	Eurylaimidae	Cymbirhynchus	macrorhynchos	(Gmelin, 1788)	ICZN	Cymbirhynchus macrorhynchus
ZMUA	AVSE	ZMUA_Aves	ZMUA	PreservedSpecimen	1150-745	GR-ZMUA_Aves-1150-745	Spielter T. W.	1			Whole animal (Stuffed)	1860	1150	India	GR	India Or.	Coordninates for India	23.7268	83.8993	2005716	Shogolev Igor	urn:lsid:catalogueoflife.org:taxon:edc6f779-18fd-11e5-9774-bc764e0806fb:col20150623	Buceros rhinoceros	Animalia	Chordata	Aves	Bucerotiformes	Bucerotidae	Buceros	rhinoceros	Linnaeus, 1758	ICZN	Buceros rhinoceros L., 1758
ZMUA	AVSE	ZMUA_Aves	ZMUA	PreservedSpecimen	1157-752	GR-ZMUA_Aves-1157-752	Spielter T. W.	1			Whole animal (Stuffed)	1860	1157	India	GR	India Or.	Coordninates for India	23.7268	83.8993	2005716	Shogolev Igor	urn:lsid:catalogueoflife.org:taxon:ea10eb93-18fd-11e5-9774-bc764e0806fb:col20150807	Anorrhinus galeritus	Animalia	Chordata	Aves	Bucerotiformes	Bucerotidae	Anorrhinus	galeritus	(Temminck, 1831)	ICZN	Anorrhinus galleritus Temminck, 1831
ZMUA	AVSE	ZMUA_Aves	ZMUA	PreservedSpecimen	1421-1016	GR-ZMUA_Aves-1421-1016	Spielter T. W.	1			Whole animal (Stuffed)	1860	1421	India	GR	India Or.	Coordninates for India	23.7268	83.8993	2005716	Shogolev Igor	urn:lsid:catalogueoflife.org:taxon:e824b7f2-18fd-11e5-9774-bc764e0806fb:col20150623	Calyptomena viridis	Animalia	Chordata	Aves	Passeriformes	Eurylaimidae	Calyptomena	viridis	Raffles, 1822	ICZN	Calyptomena viridis
ZMUA	AVSE	ZMUA_Aves	ZMUA	PreservedSpecimen	934-529	GR-ZMUA_Aves-934-529	Spielter T. W.	1	M		Whole animal (Stuffed)	1860	934	India	GR	India Or.	Coordninates for India	23.7268	83.8993	2005716	Shogolev Igor	urn:lsid:catalogueoflife.org:taxon:e824b7f2-18fd-11e5-9774-bc764e0806fb:col20150623	Calyptomena viridis	Animalia	Chordata	Aves	Passeriformes	Eurylaimidae	Calyptomena	viridis	Raffles, 1822	ICZN	Calyptomena viridis
ZMUA	AVSE	ZMUA_Aves	ZMUA	PreservedSpecimen	1216-811	GR-ZMUA_Aves-1216-811	Spielter T. W.	1			Whole animal (Stuffed)	1860	1216	India	GR	India Or.	Coordninates for India	23.7268	83.8993	2005716	Shogolev Igor	urn:lsid:catalogueoflife.org:taxon:ededb733-18fd-11e5-9774-bc764e0806fb:col20150730	Megalaima rafflesii	Animalia	Chordata	Aves	Piciformes	Ramphastidae	Megalaima	rafflesii	(Lesson, 1839)	ICZN	Megalaima rafflesii
ZMUA	AVSE	ZMUA_Aves	ZMUA	PreservedSpecimen	780-375	GR-ZMUA_Aves-780-375	Spielter T. W.	1	M	adult	Whole animal (Stuffed)	1860	780	India	GR	India Or.	Coordninates for India	23.7268	83.8993	2005716	Shogolev Igor	urn:lsid:catalogueoflife.org:taxon:23049992-18fe-11e5-9774-bc764e0806fb:col20150807	Turnix suscitator bengalensis	Animalia	Chordata	Aves	Charadriiformes	Turnicidae	Turnix	suscitator	Blyth, 1852	ICZN	Turnix suscitator bengalensis Gmelin 1789
ZMUA	AVSE	ZMUA_Aves	ZMUA	PreservedSpecimen	1809-1404	GR-ZMUA_Aves-1809-1404	Spielter T. W.	1			Whole animal (Stuffed)	1860	1809	India	GR	India Or.	Coordninates for India	23.7268	83.8993	2005716	Shogolev Igor	urn:lsid:catalogueoflife.org:taxon:e7db4c08-18fd-11e5-9774-bc764e0806fb:col20150807	Pycnonotus zeylanicus	Animalia	Chordata	Aves	Passeriformes	Pycnonotidae	Pycnonotus	zeylanicus	(Gmelin, 1789)	ICZN	Pycnonotus zeylanicus
ZMUA	AVSE	ZMUA_Aves	ZMUA	PreservedSpecimen	1182-777	GR-ZMUA_Aves-1182-777	Spielter T. W.	1			Whole animal (Stuffed)	1860	1182	India	GR	India Or.	Coordninates for India	23.7268	83.8993	2005716	Shogolev Igor	urn:lsid:catalogueoflife.org:taxon:f18b57e5-18fd-11e5-9774-bc764e0806fb:col20150807	Rhopodytes sumatranus	Animalia	Chordata	Aves	Cuculiformes	Cuculidae	Rhopodytes	sumatranus	(Raffles, 1822)	ICZN	Phaenicophaeus sumatranus Raffles, 1822
ZMUA	AVSE	ZMUA_Aves	ZMUA	PreservedSpecimen	1253-848	GR-ZMUA_Aves-1253-848	Spielter T. W.	1			Whole animal (Stuffed)	1860	1253	India	GR	India Or.	Coordninates for India	23.7268	83.8993	2005716	Shogolev Igor	urn:lsid:catalogueoflife.org:taxon:f18b57e5-18fd-11e5-9774-bc764e0806fb:col20150807	Rhopodytes sumatranus	Animalia	Chordata	Aves	Cuculiformes	Cuculidae	Rhopodytes	sumatranus	(Raffles, 1822)	ICZN	Phaenicophaeus sumatranus Raffles, 1822
ZMUA	AVSE	ZMUA_Aves	ZMUA	PreservedSpecimen	2288-1883	GR-ZMUA_Aves-2288-1883	Spielter T. W.	1			Whole animal (Stuffed)	1860	2288	India	GR	India Or.	Coordninates for India	23.7268	83.8993	2005716	Shogolev Igor	urn:lsid:catalogueoflife.org:taxon:e81ce2f9-18fd-11e5-9774-bc764e0806fb:col20150623	Chloropsis sonnerati	Animalia	Chordata	Aves	Passeriformes	Chloropseidae	Chloropsis	sonnerati	Jardine & Selby, 1827	ICZN	Chloropsis sonnerati
ZMUA	AVSE	ZMUA_Aves	ZMUA	PreservedSpecimen	859-454	GR-ZMUA_Aves-859-454	Spielter T. W.	1			Whole animal (Stuffed)	1860	859	India	GR	India Or.	Coordninates for India	23.7268	83.8993	2005716	Shogolev Igor	urn:lsid:catalogueoflife.org:taxon:ea04c7d3-18fd-11e5-9774-bc764e0806fb:col20150807	Treron olax	Animalia	Chordata	Aves	Columbiformes	Columbidae	Treron	olax	(Temminck, 1823)	ICZN	Treron olax Temm. 1823
ZMUA	AVSE	ZMUA_Aves	ZMUA	PreservedSpecimen	858-453	GR-ZMUA_Aves-858-453	Spielter T. W.	1			Whole animal (Stuffed)	1860	858	India	GR	India Or.	Coordninates for India	23.7268	83.8993	2005716	Shogolev Igor	urn:lsid:catalogueoflife.org:taxon:f919f996-18fd-11e5-9774-bc764e0806fb:col20150807	Treron seimundi	Animalia	Chordata	Aves	Columbiformes	Columbidae	Treron	seimundi	(Robinson, 1910)	ICZN	Treron seimundi Robinson, 1910
ZMUA	AVSE	ZMUA_Aves	ZMUA	PreservedSpecimen	2045-1640	GR-ZMUA_Aves-2045-1640	Spielter T. W.	1			Whole animal (Stuffed)	1860	2045	India	GR	India Or.	Coordninates for India	23.7268	83.8993	2005716	Shogolev Igor	urn:lsid:catalogueoflife.org:taxon:ee213729-18fd-11e5-9774-bc764e0806fb:col20150623	Cuculus clamosus	Animalia	Chordata	Aves	Cuculiformes	Cuculidae	Cuculus	clamosus	Latham, 1802	ICZN	Cuculus clamosus Latham, 1801
ZMUA	AVSE	ZMUA_Aves	ZMUA	PreservedSpecimen	1422-1017	GR-ZMUA_Aves-1422-1017	Spielter T. W.	1			Whole animal (Stuffed)	1860	1422	India	GR	India Or.	Coordninates for India	23.7268	83.8993	2005716	Shogolev Igor	urn:lsid:catalogueoflife.org:taxon:e7b0b1f5-18fd-11e5-9774-bc764e0806fb:col20150623	Eurylaimus ochromalus	Animalia	Chordata	Aves	Passeriformes	Eurylaimidae	Eurylaimus	ochromalus	Raffles, 1822	ICZN	Eurylaimus ochromalus
ZMUA	AVSE	ZMUA_Aves	ZMUA	PreservedSpecimen	2046-1641	GR-ZMUA_Aves-2046-1641	Spielter T. W.	1			Whole animal (Stuffed)	1860	2046	India	GR	India Or.	Coordninates for India	23.7268	83.8993	2005716	Shogolev Igor	urn:lsid:catalogueoflife.org:taxon:e7b1060b-18fd-11e5-9774-bc764e0806fb:col20150623	Copsychus malabaricus	Animalia	Chordata	Aves	Passeriformes	Muscicapidae	Copsychus	malabaricus	(Scopoli, 1786)	ICZN	Copsychus malabaricus
ZMUA	AVSE	ZMUA_Aves	ZMUA	PreservedSpecimen	950-545	GR-ZMUA_Aves-950-545	Spielter T. W.	1			Whole animal (Stuffed)	1860	950	India	GR	India Or.	Coordninates for India	23.7268	83.8993	2005716	Shogolev Igor	urn:lsid:catalogueoflife.org:taxon:ee225dd9-18fd-11e5-9774-bc764e0806fb:col20150623	Gallus gallus	Animalia	Chordata	Aves	Galliformes	Phasianidae	Gallus	gallus	(Linnaeus, 1758)	ICZN	Gallus gallus L. 1758
ZMUA	AVSE	ZMUA_Aves	ZMUA	PreservedSpecimen	2281-1876	GR-ZMUA_Aves-2281-1876	Spielter T. W.	1			Whole animal (Stuffed)	1860	2281	India	GR	India Or.	Coordninates for India	23.7268	83.8993	2005716	Shogolev Igor	urn:lsid:catalogueoflife.org:taxon:e7db7c25-18fd-11e5-9774-bc764e0806fb:col20150807	Pycnonotus atriceps	Animalia	Chordata	Aves	Passeriformes	Pycnonotidae	Pycnonotus	atriceps	(Temminck, 1822)	ICZN	Pycnonotus atriceps
ZMUA	AVSE	ZMUA_Aves	ZMUA	PreservedSpecimen	1866-1461	GR-ZMUA_Aves-1866-1461	Spielter T. W.	1			Whole animal (Stuffed)	1860	1866	India	GR	India Or.	Coordninates for India	23.7268	83.8993	2005716	Shogolev Igor	urn:lsid:catalogueoflife.org:taxon:e7b97e24-18fd-11e5-9774-bc764e0806fb:col20150623	Gracula religiosa	Animalia	Chordata	Aves	Passeriformes	Sturnidae	Gracula	religiosa	Linnaeus, 1758	ICZN	Gracula religiosa
ZMUA	AVSE	ZMUA_Aves	ZMUA	PreservedSpecimen	2286-1881	GR-ZMUA_Aves-2286-1881	Spielter T. W.	1			Whole animal (Stuffed)	1860	2286	India	GR	India Or.	Coordninates for India	23.7268	83.8993	2005716	Shogolev Igor	urn:lsid:catalogueoflife.org:taxon:e81cdd8f-18fd-11e5-9774-bc764e0806fb:col20150623	Chloropsis cyanopogon	Animalia	Chordata	Aves	Passeriformes	Chloropseidae	Chloropsis	cyanopogon	(Temminck, 1830)	ICZN	Chloropsis cyanopogon
ZMUA	AVSE	ZMUA_Aves	ZMUA	PreservedSpecimen	500-95	GR-ZMUA_Aves-500-95	Victor	1			Whole animal (Stuffed)	1860	500	Greece	GR	Missolonghi	Coordinates for Messolongi	38.3692	21.4292	3971	Shogolev Igor	urn:lsid:catalogueoflife.org:taxon:e7c6a17c-18fd-11e5-9774-bc764e0806fb:col20150807	Saxicola torquatus	Animalia	Chordata	Aves	Passeriformes	Muscicapidae	Saxicola	torquatus	(Linnaeus, 1766)	ICZN	Saxicola torguata (L.)
ZMUA	AVSE	ZMUA_Aves	ZMUA	PreservedSpecimen	2772-2367	GR-ZMUA_Aves-2772-2367	Victor	1	F		Whole animal (Stuffed)	1860	2772	Greece	GR	Missolonghi	Coordinates for Messolongi	38.3692	21.4292	3971	Shogolev Igor	urn:lsid:catalogueoflife.org:taxon:fbbee816-18fd-11e5-9774-bc764e0806fb:col20150807	Numenius arquata	Animalia	Chordata	Aves	Charadriiformes	Scolopacidae	Numenius	arquata	(Linnaeus, 1758)	ICZN	Numenius arquata (L.), 1758
ZMUA	AVSE	ZMUA_Aves	ZMUA	PreservedSpecimen	1504-1099	GR-ZMUA_Aves-1504-1099	Villard C. d.	1	M	adult	Whole animal (Stuffed)	1860	1504	Brazil	GR	Brazil	Coordinates according to: http://bl.ocks.org/rdmpage/raw/9951904/	-12.607	-54.423	2281819	Shogolev Igor	urn:lsid:catalogueoflife.org:taxon:e7abb06e-18fd-11e5-9774-bc764e0806fb:col20150807	Thamnophilus palliatus	Animalia	Chordata	Aves	Passeriformes	Thamnophilidae	Thamnophilus	palliatus	(Lichtenstein, 1823)	ICZN	Thamnophilus palliatus
ZMUA	AVSE	ZMUA_Aves	ZMUA	PreservedSpecimen	777-372	GR-ZMUA_Aves-777-372		1	F	adult	Whole animal (Stuffed)	1860	777	Greece	GR	Attica	Coordinates according to: http://bl.ocks.org/rdmpage/raw/9951904/	37.9789	23.6696	50004	Shogolev Igor	urn:lsid:catalogueoflife.org:taxon:f3722aa6-18fd-11e5-9774-bc764e0806fb:col20150623	Buteo buteo	Animalia	Chordata	Aves	Accipitriformes	Accipitridae	Buteo	buteo	(Linnaeus, 1758)	ICZN	Buteo buteo (L.)
ZMUA	AVSE	ZMUA_Aves	ZMUA	PreservedSpecimen	1410-1005	GR-ZMUA_Aves-1410-1005		1		juvenile	Whole animal (Stuffed)	1860	1410	Greece	GR	Taygetus	Coordinates according to: http://bl.ocks.org/rdmpage/raw/9951904/	37.0123	22.3522	34484	Shogolev Igor	urn:lsid:catalogueoflife.org:taxon:e8248d7b-18fd-11e5-9774-bc764e0806fb:col20150623	Hirundo rustica	Animalia	Chordata	Aves	Passeriformes	Hirundinidae	Hirundo	rustica	Linnaeus, 1758	ICZN	Hirundo rustica
ZMUA	AVSE	ZMUA_Aves	ZMUA	PreservedSpecimen	2749-2344	GR-ZMUA_Aves-2749-2344		1	M	adult	Whole animal (Stuffed)	1860	2749	Greece	GR	Attica	Coordinates according to: http://bl.ocks.org/rdmpage/raw/9951904/	37.9789	23.6696	50004	Shogolev Igor	urn:lsid:catalogueoflife.org:taxon:fb5dd017-18fd-11e5-9774-bc764e0806fb:col20150623	Calidris ferruginea	Animalia	Chordata	Aves	Charadriiformes	Scolopacidae	Calidris	ferruginea	(Pontoppidan, 1763)	ICZN	Calidris ferruginea (Pontopp.), 1763
ZMUA	AVSE	ZMUA_Aves	ZMUA	Occurrence	BA4-2900	GR-ZMUA_Aves-BA4-2900		1			Specimen unavailable	1860	BA4		GR									Animalia	Chordata	Aves						ICZN
ZMUA	AVSE	ZMUA_Aves	ZMUA	PreservedSpecimen	1779-1374	GR-ZMUA_Aves-1779-1374	E.T.T.E.	1			Whole animal (Stuffed)	1861	1779		GR	Africa	Coordinates according to: http://bl.ocks.org/rdmpage/raw/9951904/	2.31186	15.7562	4243522	Shogolev Igor	urn:lsid:catalogueoflife.org:taxon:e83642e9-18fd-11e5-9774-bc764e0806fb:col20150623	Calendulauda africanoides	Animalia	Chordata	Aves	Passeriformes	Alaudidae	Calendulauda	africanoides	(A. Smith, 1836)	ICZN	Mirafra africanoides
ZMUA	AVSE	ZMUA_Aves	ZMUA	PreservedSpecimen	1780-1375	GR-ZMUA_Aves-1780-1375	E.T.T.E.	1			Whole animal (Stuffed)	1861	1780		GR	Africa	Coordinates according to: http://bl.ocks.org/rdmpage/raw/9951904/	2.31186	15.7562	4243522	Shogolev Igor	urn:lsid:catalogueoflife.org:taxon:e83642e9-18fd-11e5-9774-bc764e0806fb:col20150623	Calendulauda africanoides	Animalia	Chordata	Aves	Passeriformes	Alaudidae	Calendulauda	africanoides	(A. Smith, 1836)	ICZN	Mirafra africanoides
ZMUA	AVSE	ZMUA_Aves	ZMUA	PreservedSpecimen	1360-955	GR-ZMUA_Aves-1360-955	Ninni A.	1	F	adult	Whole animal (Stuffed)	1861	1360	Italy	GR	Italy	Coordinates according to: http://bl.ocks.org/rdmpage/raw/9951904/	42.2884	13.0518	630876	Shogolev Igor	urn:lsid:catalogueoflife.org:taxon:e7b56e80-18fd-11e5-9774-bc764e0806fb:col20150807	Turdus pilaris	Animalia	Chordata	Aves	Passeriformes	Turdidae	Turdus	pilaris	Linnaeus, 1758	ICZN	Turdus pilaris
ZMUA	AVSE	ZMUA_Aves	ZMUA	PreservedSpecimen	2768-2363	GR-ZMUA_Aves-2768-2363	Schrader G.	1	M	adult	Whole animal (Stuffed)	1861	2768	Greece	GR	Attica	Coordinates according to: http://bl.ocks.org/rdmpage/raw/9951904/	37.9789	23.6696	50004	Shogolev Igor	urn:lsid:catalogueoflife.org:taxon:0d1977c7-18fe-11e5-9774-bc764e0806fb:col20150623	Ichthyaetus melanocephalus	Animalia	Chordata	Aves	Charadriiformes	Laridae	Ichthyaetus	melanocephalus	(Temminck, 1820)	ICZN	Larus melanocephalus Temm.
ZMUA	AVSE	ZMUA_Aves	ZMUA	PreservedSpecimen	663-258	GR-ZMUA_Aves-663-258	Schrader G.	1	F	adult	Whole animal (Stuffed)	1861	663	Greece	GR	Attica	Coordinates according to: http://bl.ocks.org/rdmpage/raw/9951904/	37.9789	23.6696	50004	Shogolev Igor	urn:lsid:catalogueoflife.org:taxon:fb5dc921-18fd-11e5-9774-bc764e0806fb:col20150623	Calidris minuta	Animalia	Chordata	Aves	Charadriiformes	Scolopacidae	Calidris	minuta	(Leisler, 1812)	ICZN	Calidris minuta (Leise)
ZMUA	AVSE	ZMUA_Aves	ZMUA	PreservedSpecimen	664-259	GR-ZMUA_Aves-664-259	Schrader G.	1	M	adult	Whole animal (Stuffed)	1861	664	Greece	GR	Attica	Coordinates according to: http://bl.ocks.org/rdmpage/raw/9951904/	37.9789	23.6696	50004	Shogolev Igor	urn:lsid:catalogueoflife.org:taxon:fb5dc921-18fd-11e5-9774-bc764e0806fb:col20150623	Calidris minuta	Animalia	Chordata	Aves	Charadriiformes	Scolopacidae	Calidris	minuta	(Leisler, 1812)	ICZN	Calidris minuta Leisler, 1812
ZMUA	AVSE	ZMUA_Aves	ZMUA	PreservedSpecimen	2746-2341	GR-ZMUA_Aves-2746-2341	Schrader G.	1	M	adult	Whole animal (Stuffed)	1861	2746	Greece	GR	Attica	Coordinates according to: http://bl.ocks.org/rdmpage/raw/9951904/	37.9789	23.6696	50004	Shogolev Igor	urn:lsid:catalogueoflife.org:taxon:fb5dc921-18fd-11e5-9774-bc764e0806fb:col20150623	Calidris minuta	Animalia	Chordata	Aves	Charadriiformes	Scolopacidae	Calidris	minuta	(Leisler, 1812)	ICZN	Calidris minuta Leisler, 1812
ZMUA	AVSE	ZMUA_Aves	ZMUA	PreservedSpecimen	2748-2343	GR-ZMUA_Aves-2748-2343	Schrader G.	1	F	adult	Whole animal (Stuffed)	1861	2748	Greece	GR	Attica	Coordinates according to: http://bl.ocks.org/rdmpage/raw/9951904/	37.9789	23.6696	50004	Shogolev Igor	urn:lsid:catalogueoflife.org:taxon:fb5dc921-18fd-11e5-9774-bc764e0806fb:col20150623	Calidris minuta	Animalia	Chordata	Aves	Charadriiformes	Scolopacidae	Calidris	minuta	(Leisler, 1812)	ICZN	Calidris minuta Leisler, 1812
ZMUA	AVSE	ZMUA_Aves	ZMUA	PreservedSpecimen	2410-2005	GR-ZMUA_Aves-2410-2005	Schrader G.	1			Whole animal (Stuffed)	1861	2410	Brazil	GR	Brazil	Coordinates according to: http://bl.ocks.org/rdmpage/raw/9951904/	-12.607	-54.423	2281819	Shogolev Igor	urn:lsid:catalogueoflife.org:taxon:f8159a87-18fd-11e5-9774-bc764e0806fb:col20150623	Geothlypis aequinoctialis	Animalia	Chordata	Aves	Passeriformes	Parulidae	Geothlypis	aequinoctialis	(Gmelin, 1789)	ICZN	Geothlypis aequinoctialis
ZMUA	AVSE	ZMUA_Aves	ZMUA	PreservedSpecimen	1346-941	GR-ZMUA_Aves-1346-941	Schrader G.	1			Whole animal (Stuffed)	1861	1346	Brazil	GR	Brazil	Coordinates according to: http://bl.ocks.org/rdmpage/raw/9951904/	-12.607	-54.423	2281819	Shogolev Igor	urn:lsid:catalogueoflife.org:taxon:e8224890-18fd-11e5-9774-bc764e0806fb:col20150623	Hypoedaleus guttatus	Animalia	Chordata	Aves	Passeriformes	Thamnophilidae	Hypoedaleus	guttatus	(Vieillot, 1816)	ICZN	Hypoedaleus guttatus
ZMUA	AVSE	ZMUA_Aves	ZMUA	PreservedSpecimen	1252-847	GR-ZMUA_Aves-1252-847	Schrader G.	1			Whole animal (Stuffed)	1861	1252	Brazil	GR	Brazil	Coordinates according to: http://bl.ocks.org/rdmpage/raw/9951904/	-12.607	-54.423	2281819	Shogolev Igor	urn:lsid:catalogueoflife.org:taxon:f81583d0-18fd-11e5-9774-bc764e0806fb:col20150623	Guira guira	Animalia	Chordata	Aves	Cuculiformes	Cuculidae	Guira	guira	(Gmelin, 1788)	ICZN	Guira guira J. F. Gmelin, 1788
ZMUA	AVSE	ZMUA_Aves	ZMUA	PreservedSpecimen	1423-1018	GR-ZMUA_Aves-1423-1018	Spielter T. W.	1			Whole animal (Stuffed)	1861	1423		GR	India	Coordinates according to: http://www.davidrumsey.com/luna/servlet/detail/RUMSEY~8~1~209897~5003705:India-?showTip=false&showTipAdvancedSearch=false&title=Search+Results%3A+List_No+equal+to+%271550.100%27&thumbnailViewUrlKey=link.view.search.url&helpUrl=http%3A%2F%2Fdoc.lunaimaging.com%2Fdisplay%2FV71D%2FLUNA%2BViewer%23LUNAViewer-LUNAViewer&fullTextSearchChecked=&advancedSearchUrl=http%3A%2F%2Fdo…	23.7268	83.8993	2005716	Shogolev Igor	urn:lsid:catalogueoflife.org:taxon:e7b0b1f5-18fd-11e5-9774-bc764e0806fb:col20150623	Eurylaimus ochromalus	Animalia	Chordata	Aves	Passeriformes	Eurylaimidae	Eurylaimus	ochromalus	Raffles, 1822	ICZN	Eurylaimus ochromalus
ZMUA	AVSE	ZMUA_Aves	ZMUA	PreservedSpecimen	1145-740	GR-ZMUA_Aves-1145-740	Spielter T. W.	1			Whole animal (Stuffed)	1861	1145		GR	India	Coordinates according to: http://www.davidrumsey.com/luna/servlet/detail/RUMSEY~8~1~209897~5003705:India-?showTip=false&showTipAdvancedSearch=false&title=Search+Results%3A+List_No+equal+to+%271550.100%27&thumbnailViewUrlKey=link.view.search.url&helpUrl=http%3A%2F%2Fdoc.lunaimaging.com%2Fdisplay%2FV71D%2FLUNA%2BViewer%23LUNAViewer-LUNAViewer&fullTextSearchChecked=&advancedSearchUrl=http%3A%2F%2Fdo…	23.7268	83.8993	2005716	Shogolev Igor	urn:lsid:catalogueoflife.org:taxon:fb7227b9-18fd-11e5-9774-bc764e0806fb:col20150623	Harpactes orrhophaeus	Animalia	Chordata	Aves	Trogoniformes	Trogonidae	Harpactes	orrhophaeus	(Cabanis & Heine, 1863)	ICZN	Herpactes orrhophaeus Cabanis & Heine, 1863
ZMUA	AVSE	ZMUA_Aves	ZMUA	PreservedSpecimen	702-297	GR-ZMUA_Aves-702-297	Spielter T. W.	1			Whole animal (Stuffed)	1861	702		GR	India	Coordinates according to: http://www.davidrumsey.com/luna/servlet/detail/RUMSEY~8~1~209897~5003705:India-?showTip=false&showTipAdvancedSearch=false&title=Search+Results%3A+List_No+equal+to+%271550.100%27&thumbnailViewUrlKey=link.view.search.url&helpUrl=http%3A%2F%2Fdoc.lunaimaging.com%2Fdisplay%2FV71D%2FLUNA%2BViewer%23LUNAViewer-LUNAViewer&fullTextSearchChecked=&advancedSearchUrl=http%3A%2F%2Fdo…	23.7268	83.8993	2005716	Shogolev Igor	urn:lsid:catalogueoflife.org:taxon:ee1fbaf0-18fd-11e5-9774-bc764e0806fb:col20150623	Crypturellus erythropus	Animalia	Chordata	Aves	Tinamiformes	Tinamidae	Crypturellus	erythropus	(Pelzeln, 1863)	ICZN	Crypturellus erythropus Petzein, 1863
ZMUA	AVSE	ZMUA_Aves	ZMUA	PreservedSpecimen	857-452	GR-ZMUA_Aves-857-452	Spielter T. W.	1			Whole animal (Stuffed)	1861	857		GR	India	Coordinates according to: http://www.davidrumsey.com/luna/servlet/detail/RUMSEY~8~1~209897~5003705:India-?showTip=false&showTipAdvancedSearch=false&title=Search+Results%3A+List_No+equal+to+%271550.100%27&thumbnailViewUrlKey=link.view.search.url&helpUrl=http%3A%2F%2Fdoc.lunaimaging.com%2Fdisplay%2FV71D%2FLUNA%2BViewer%23LUNAViewer-LUNAViewer&fullTextSearchChecked=&advancedSearchUrl=http%3A%2F%2Fdo…	23.7268	83.8993	2005716	Shogolev Igor	urn:lsid:catalogueoflife.org:taxon:ea04c7d3-18fd-11e5-9774-bc764e0806fb:col20150807	Treron olax	Animalia	Chordata	Aves	Columbiformes	Columbidae	Treron	olax	(Temminck, 1823)	ICZN	Treron olax Temm. 1823
ZMUA	AVSE	ZMUA_Aves	ZMUA	PreservedSpecimen	784-379	GR-ZMUA_Aves-784-379	Spielter T. W.	1	F	adult	Whole animal (Stuffed)	1861	784		GR	India	Coordinates according to: http://www.davidrumsey.com/luna/servlet/detail/RUMSEY~8~1~209897~5003705:India-?showTip=false&showTipAdvancedSearch=false&title=Search+Results%3A+List_No+equal+to+%271550.100%27&thumbnailViewUrlKey=link.view.search.url&helpUrl=http%3A%2F%2Fdoc.lunaimaging.com%2Fdisplay%2FV71D%2FLUNA%2BViewer%23LUNAViewer-LUNAViewer&fullTextSearchChecked=&advancedSearchUrl=http%3A%2F%2Fdo…	23.7268	83.8993	2005716	Shogolev Igor	urn:lsid:catalogueoflife.org:taxon:fb568e31-18fd-11e5-9774-bc764e0806fb:col20150807	Perdicula asiatica	Animalia	Chordata	Aves	Galliformes	Phasianidae	Perdicula	asiatica	(Latham, 1790)	ICZN	Perdicula asiatica Latham 1790
ZMUA	AVSE	ZMUA_Aves	ZMUA	PreservedSpecimen	1233-828	GR-ZMUA_Aves-1233-828	Spielter T. W.	1			Whole animal (Stuffed)	1861	1233		GR	India	Coordinates according to: http://www.davidrumsey.com/luna/servlet/detail/RUMSEY~8~1~209897~5003705:India-?showTip=false&showTipAdvancedSearch=false&title=Search+Results%3A+List_No+equal+to+%271550.100%27&thumbnailViewUrlKey=link.view.search.url&helpUrl=http%3A%2F%2Fdoc.lunaimaging.com%2Fdisplay%2FV71D%2FLUNA%2BViewer%23LUNAViewer-LUNAViewer&fullTextSearchChecked=&advancedSearchUrl=http%3A%2F%2Fdo…	23.7268	83.8993	2005716	Shogolev Igor	urn:lsid:catalogueoflife.org:taxon:ededccc9-18fd-11e5-9774-bc764e0806fb:col20150730	Meiglyptes tukki	Animalia	Chordata	Aves	Piciformes	Picidae	Meiglyptes	tukki	(Lesson, 1839)	ICZN	Meiglyptes tukki
ZMUA	AVSE	ZMUA_Aves	ZMUA	PreservedSpecimen	1235-830	GR-ZMUA_Aves-1235-830	Spielter T. W.	1			Whole animal (Stuffed)	1861	1235		GR	India	Coordinates according to: http://www.davidrumsey.com/luna/servlet/detail/RUMSEY~8~1~209897~5003705:India-?showTip=false&showTipAdvancedSearch=false&title=Search+Results%3A+List_No+equal+to+%271550.100%27&thumbnailViewUrlKey=link.view.search.url&helpUrl=http%3A%2F%2Fdoc.lunaimaging.com%2Fdisplay%2FV71D%2FLUNA%2BViewer%23LUNAViewer-LUNAViewer&fullTextSearchChecked=&advancedSearchUrl=http%3A%2F%2Fdo…	23.7268	83.8993	2005716	Shogolev Igor	urn:lsid:catalogueoflife.org:taxon:ededccc9-18fd-11e5-9774-bc764e0806fb:col20150730	Meiglyptes tukki	Animalia	Chordata	Aves	Piciformes	Picidae	Meiglyptes	tukki	(Lesson, 1839)	ICZN	Meiglyptes tukki
ZMUA	AVSE	ZMUA_Aves	ZMUA	PreservedSpecimen	1135-730	GR-ZMUA_Aves-1135-730	Spielter T. W.	1	F	adult	Whole animal (Stuffed)	1861	1135		GR	India	Coordinates according to: http://www.davidrumsey.com/luna/servlet/detail/RUMSEY~8~1~209897~5003705:India-?showTip=false&showTipAdvancedSearch=false&title=Search+Results%3A+List_No+equal+to+%271550.100%27&thumbnailViewUrlKey=link.view.search.url&helpUrl=http%3A%2F%2Fdoc.lunaimaging.com%2Fdisplay%2FV71D%2FLUNA%2BViewer%23LUNAViewer-LUNAViewer&fullTextSearchChecked=&advancedSearchUrl=http%3A%2F%2Fdo…	23.7268	83.8993	2005716	Shogolev Igor	urn:lsid:catalogueoflife.org:taxon:ededf450-18fd-11e5-9774-bc764e0806fb:col20150807	Picus puniceus	Animalia	Chordata	Aves	Piciformes	Picidae	Picus	puniceus	Horsfield, 1821	ICZN	Picus puniceus
ZMUA	AVSE	ZMUA_Aves	ZMUA	PreservedSpecimen	1529-1124	GR-ZMUA_Aves-1529-1124	Spielter T. W.	1	F	adult	Whole animal (Stuffed)	1861	1529		GR	India	Coordinates according to: http://www.davidrumsey.com/luna/servlet/detail/RUMSEY~8~1~209897~5003705:India-?showTip=false&showTipAdvancedSearch=false&title=Search+Results%3A+List_No+equal+to+%271550.100%27&thumbnailViewUrlKey=link.view.search.url&helpUrl=http%3A%2F%2Fdoc.lunaimaging.com%2Fdisplay%2FV71D%2FLUNA%2BViewer%23LUNAViewer-LUNAViewer&fullTextSearchChecked=&advancedSearchUrl=http%3A%2F%2Fdo…	23.7268	83.8993	2005716	Shogolev Igor	urn:lsid:catalogueoflife.org:taxon:e7bf87b3-18fd-11e5-9774-bc764e0806fb:col20150807	Pitta sordida	Animalia	Chordata	Aves	Passeriformes	Pittidae	Pitta	sordida	(Statius Muller, 1776)	ICZN	Pitta sordida
ZMUA	AVSE	ZMUA_Aves	ZMUA	PreservedSpecimen	1398-993	GR-ZMUA_Aves-1398-993	Spielter T. W.	1			Whole animal (Stuffed)	1861	1398		GR	India	Coordinates according to: http://www.davidrumsey.com/luna/servlet/detail/RUMSEY~8~1~209897~5003705:India-?showTip=false&showTipAdvancedSearch=false&title=Search+Results%3A+List_No+equal+to+%271550.100%27&thumbnailViewUrlKey=link.view.search.url&helpUrl=http%3A%2F%2Fdoc.lunaimaging.com%2Fdisplay%2FV71D%2FLUNA%2BViewer%23LUNAViewer-LUNAViewer&fullTextSearchChecked=&advancedSearchUrl=http%3A%2F%2Fdo…	23.7268	83.8993	2005716	Shogolev Igor	urn:lsid:catalogueoflife.org:taxon:f18b57e5-18fd-11e5-9774-bc764e0806fb:col20150807	Rhopodytes sumatranus	Animalia	Chordata	Aves	Cuculiformes	Cuculidae	Rhopodytes	sumatranus	(Raffles, 1822)	ICZN	Phaenicophaeus sumatranus Raffles, 1822
ZMUA	AVSE	ZMUA_Aves	ZMUA	PreservedSpecimen	1591-1186	GR-ZMUA_Aves-1591-1186	Spielter T. W.	1			Whole animal (Stuffed)	1861	1591		GR	India	Coordinates according to: http://www.davidrumsey.com/luna/servlet/detail/RUMSEY~8~1~209897~5003705:India-?showTip=false&showTipAdvancedSearch=false&title=Search+Results%3A+List_No+equal+to+%271550.100%27&thumbnailViewUrlKey=link.view.search.url&helpUrl=http%3A%2F%2Fdoc.lunaimaging.com%2Fdisplay%2FV71D%2FLUNA%2BViewer%23LUNAViewer-LUNAViewer&fullTextSearchChecked=&advancedSearchUrl=http%3A%2F%2Fdo…	23.7268	83.8993	2005716	Shogolev Igor	urn:lsid:catalogueoflife.org:taxon:245f5d56-18fe-11e5-9774-bc764e0806fb:col20150807	Pelargopsis capensis malaccensis	Animalia	Chordata	Aves	Coraciiformes	Alcedinidae	Pelargopsis	capensis	Sharpe, 1870	ICZN	Pelargopsis capensis malaccensis Sharpe, 1870
ZMUA	AVSE	ZMUA_Aves	ZMUA	PreservedSpecimen	2141-1736	GR-ZMUA_Aves-2141-1736	Spielter T. W.	1			Whole animal (Stuffed)	1861	2141		GR	India	Coordinates according to: http://www.davidrumsey.com/luna/servlet/detail/RUMSEY~8~1~209897~5003705:India-?showTip=false&showTipAdvancedSearch=false&title=Search+Results%3A+List_No+equal+to+%271550.100%27&thumbnailViewUrlKey=link.view.search.url&helpUrl=http%3A%2F%2Fdoc.lunaimaging.com%2Fdisplay%2FV71D%2FLUNA%2BViewer%23LUNAViewer-LUNAViewer&fullTextSearchChecked=&advancedSearchUrl=http%3A%2F%2Fdo…	23.7268	83.8993	2005716	Shogolev Igor	urn:lsid:catalogueoflife.org:taxon:e833feba-18fd-11e5-9774-bc764e0806fb:col20150807	Turdoides subrufa	Animalia	Chordata	Aves	Passeriformes	Leiothrichidae	Turdoides	subrufa	(Jerdon, 1839)	ICZN	Turdoides subrufus
ZMUA	AVSE	ZMUA_Aves	ZMUA	PreservedSpecimen	2331-1926	GR-ZMUA_Aves-2331-1926	Spielter T. W.	1			Whole animal (Stuffed)	1861	2331		GR	India	Coordinates according to: http://www.davidrumsey.com/luna/servlet/detail/RUMSEY~8~1~209897~5003705:India-?showTip=false&showTipAdvancedSearch=false&title=Search+Results%3A+List_No+equal+to+%271550.100%27&thumbnailViewUrlKey=link.view.search.url&helpUrl=http%3A%2F%2Fdoc.lunaimaging.com%2Fdisplay%2FV71D%2FLUNA%2BViewer%23LUNAViewer-LUNAViewer&fullTextSearchChecked=&advancedSearchUrl=http%3A%2F%2Fdo…	23.7268	83.8993	2005716	Shogolev Igor	urn:lsid:catalogueoflife.org:taxon:e7b1060b-18fd-11e5-9774-bc764e0806fb:col20150623	Copsychus malabaricus	Animalia	Chordata	Aves	Passeriformes	Muscicapidae	Copsychus	malabaricus	(Scopoli, 1786)	ICZN	Copsychus malabaricus
ZMUA	AVSE	ZMUA_Aves	ZMUA	PreservedSpecimen	1201-796	GR-ZMUA_Aves-1201-796	Spielter T. W.	1			Whole animal (Stuffed)	1861	1201		GR	India	Coordinates according to: http://www.davidrumsey.com/luna/servlet/detail/RUMSEY~8~1~209897~5003705:India-?showTip=false&showTipAdvancedSearch=false&title=Search+Results%3A+List_No+equal+to+%271550.100%27&thumbnailViewUrlKey=link.view.search.url&helpUrl=http%3A%2F%2Fdoc.lunaimaging.com%2Fdisplay%2FV71D%2FLUNA%2BViewer%23LUNAViewer-LUNAViewer&fullTextSearchChecked=&advancedSearchUrl=http%3A%2F%2Fdo…	23.7268	83.8993	2005716	Shogolev Igor	urn:lsid:catalogueoflife.org:taxon:ede219f4-18fd-11e5-9774-bc764e0806fb:col20150623	Caloramphus fuliginosus	Animalia	Chordata	Aves	Piciformes	Ramphastidae	Caloramphus	fuliginosus	(Temminck, 1830)	ICZN	Calorhamphus fuliginosus
ZMUA	AVSE	ZMUA_Aves	ZMUA	PreservedSpecimen	1203-798	GR-ZMUA_Aves-1203-798	Spielter T. W.	1			Whole animal (Stuffed)	1861	1203		GR	India	Coordinates according to: http://www.davidrumsey.com/luna/servlet/detail/RUMSEY~8~1~209897~5003705:India-?showTip=false&showTipAdvancedSearch=false&title=Search+Results%3A+List_No+equal+to+%271550.100%27&thumbnailViewUrlKey=link.view.search.url&helpUrl=http%3A%2F%2Fdoc.lunaimaging.com%2Fdisplay%2FV71D%2FLUNA%2BViewer%23LUNAViewer-LUNAViewer&fullTextSearchChecked=&advancedSearchUrl=http%3A%2F%2Fdo…	23.7268	83.8993	2005716	Shogolev Igor	urn:lsid:catalogueoflife.org:taxon:ede21df0-18fd-11e5-9774-bc764e0806fb:col20150730	Megalaima australis	Animalia	Chordata	Aves	Piciformes	Ramphastidae	Megalaima	australis	(Horsfield, 1821)	ICZN	Megalaima australis
ZMUA	AVSE	ZMUA_Aves	ZMUA	PreservedSpecimen	2426-2021	GR-ZMUA_Aves-2426-2021	Spielter T. W.	1			Whole animal (Stuffed)	1861	2426		GR	India	Coordinates according to: http://www.davidrumsey.com/luna/servlet/detail/RUMSEY~8~1~209897~5003705:India-?showTip=false&showTipAdvancedSearch=false&title=Search+Results%3A+List_No+equal+to+%271550.100%27&thumbnailViewUrlKey=link.view.search.url&helpUrl=http%3A%2F%2Fdoc.lunaimaging.com%2Fdisplay%2FV71D%2FLUNA%2BViewer%23LUNAViewer-LUNAViewer&fullTextSearchChecked=&advancedSearchUrl=http%3A%2F%2Fdo…	23.7268	83.8993	2005716	Shogolev Igor	urn:lsid:catalogueoflife.org:taxon:e6e4ea48-18fd-11e5-9774-bc764e0806fb:col20150623	Aplonis panayensis	Animalia	Chordata	Aves	Passeriformes	Sturnidae	Aplonis	panayensis	(Scopoli, 1786)	ICZN	Aplonis panayensis
ZMUA	AVSE	ZMUA_Aves	ZMUA	PreservedSpecimen	1204-799	GR-ZMUA_Aves-1204-799	Spielter T. W.	1			Whole animal (Stuffed)	1861	1204		GR	India	Coordinates according to: http://www.davidrumsey.com/luna/servlet/detail/RUMSEY~8~1~209897~5003705:India-?showTip=false&showTipAdvancedSearch=false&title=Search+Results%3A+List_No+equal+to+%271550.100%27&thumbnailViewUrlKey=link.view.search.url&helpUrl=http%3A%2F%2Fdoc.lunaimaging.com%2Fdisplay%2FV71D%2FLUNA%2BViewer%23LUNAViewer-LUNAViewer&fullTextSearchChecked=&advancedSearchUrl=http%3A%2F%2Fdo…	23.7268	83.8993	2005716	Shogolev Igor	urn:lsid:catalogueoflife.org:taxon:ede219f4-18fd-11e5-9774-bc764e0806fb:col20150623	Caloramphus fuliginosus	Animalia	Chordata	Aves	Piciformes	Ramphastidae	Caloramphus	fuliginosus	(Temminck, 1830)	ICZN	Calorhamphus fuliginosus
ZMUA	AVSE	ZMUA_Aves	ZMUA	PreservedSpecimen	1619-1214	GR-ZMUA_Aves-1619-1214	Spielter T. W.	1			Whole animal (Stuffed)	1861	1619	India	GR	India Or.	Coordninates for India	23.7268	83.8993	2005716	Shogolev Igor	urn:lsid:catalogueoflife.org:taxon:ee137209-18fd-11e5-9774-bc764e0806fb:col20150623	Chloroceryle americana	Animalia	Chordata	Aves	Coraciiformes	Alcedinidae	Chloroceryle	americana	(Gmelin, 1788)	ICZN	Chloroceryle americana J. F. Gmelin, 1788
ZMUA	AVSE	ZMUA_Aves	ZMUA	PreservedSpecimen	1832-1427	GR-ZMUA_Aves-1832-1427	Spielter T. W.	1			Whole animal (Stuffed)	1861	1832	India	GR	India Or.	Coordninates for India	23.7268	83.8993	2005716	Shogolev Igor	urn:lsid:catalogueoflife.org:taxon:e6e4ddc5-18fd-11e5-9774-bc764e0806fb:col20150623	Arachnothera flavigaster	Animalia	Chordata	Aves	Passeriformes	Nectariniidae	Arachnothera	flavigaster	(Eyton, 1839)	ICZN	Arachnothera flavigaster
ZMUA	AVSE	ZMUA_Aves	ZMUA	PreservedSpecimen	694-289	GR-ZMUA_Aves-694-289	Spielter T. W.	1			Whole animal (Stuffed)	1861	694	India	GR	India Or.	Coordninates for India	23.7268	83.8993	2005716	Shogolev Igor	urn:lsid:catalogueoflife.org:taxon:ee1d20a0-18fd-11e5-9774-bc764e0806fb:col20150623	Gallinago gallinago	Animalia	Chordata	Aves	Charadriiformes	Scolopacidae	Gallinago	gallinago	(Linnaeus, 1758)	ICZN	Gallinago gallinago (L.)
ZMUA	AVSE	ZMUA_Aves	ZMUA	PreservedSpecimen	1144-739	GR-ZMUA_Aves-1144-739	Spielter T. W.	1			Whole animal (Stuffed)	1861	1144	India	GR	India Or.	Coordninates for India	23.7268	83.8993	2005716	Shogolev Igor	urn:lsid:catalogueoflife.org:taxon:fb722e70-18fd-11e5-9774-bc764e0806fb:col20150623	Harpactes fasciatus	Animalia	Chordata	Aves	Trogoniformes	Trogonidae	Harpactes	fasciatus	(Pennant, 1769)	ICZN	Harpactes fasciatus Pennant, 1769
ZMUA	AVSE	ZMUA_Aves	ZMUA	PreservedSpecimen	1232-827	GR-ZMUA_Aves-1232-827	Spielter T. W.	1			Whole animal (Stuffed)	1861	1232	India	GR	India Or.	Coordninates for India	23.7268	83.8993	2005716	Shogolev Igor	urn:lsid:catalogueoflife.org:taxon:ededccc9-18fd-11e5-9774-bc764e0806fb:col20150730	Meiglyptes tukki	Animalia	Chordata	Aves	Piciformes	Picidae	Meiglyptes	tukki	(Lesson, 1839)	ICZN	Meiglyptes tukki
ZMUA	AVSE	ZMUA_Aves	ZMUA	PreservedSpecimen	1234-829	GR-ZMUA_Aves-1234-829	Spielter T. W.	1			Whole animal (Stuffed)	1861	1234	India	GR	India Or.	Coordninates for India	23.7268	83.8993	2005716	Shogolev Igor	urn:lsid:catalogueoflife.org:taxon:ededccc9-18fd-11e5-9774-bc764e0806fb:col20150730	Meiglyptes tristis	Animalia	Chordata	Aves	Piciformes	Picidae	Meiglyptes	tristis	(Horsfield, 1821)	ICZN	Meiglyptes tristi
ZMUA	AVSE	ZMUA_Aves	ZMUA	PreservedSpecimen	1100-695	GR-ZMUA_Aves-1100-695	Spielter T. W.	1	M	adult	Whole animal (Stuffed)	1861	1100	India	GR	India Or.	Coordninates for India	23.7268	83.8993	2005716	Shogolev Igor	urn:lsid:catalogueoflife.org:taxon:e8663986-18fd-11e5-9774-bc764e0806fb:col20150623	Ictinia plumbea	Animalia	Chordata	Aves	Accipitriformes	Accipitridae	Ictinia	plumbea	(Gmelin, 1788)	ICZN	Ictinia plumbea Gmelin 1788
ZMUA	AVSE	ZMUA_Aves	ZMUA	PreservedSpecimen	693-288	GR-ZMUA_Aves-693-288	Spielter T. W.	1			Whole animal (Stuffed)	1861	693	India	GR	India Or.	Coordninates for India	23.7268	83.8993	2005716	Shogolev Igor	urn:lsid:catalogueoflife.org:taxon:ee1d20a0-18fd-11e5-9774-bc764e0806fb:col20150623	Gallinago gallinago	Animalia	Chordata	Aves	Charadriiformes	Scolopacidae	Gallinago	gallinago	(Linnaeus, 1758)	ICZN	Gallinago gallinago (L.)
ZMUA	AVSE	ZMUA_Aves	ZMUA	PreservedSpecimen	1770-1365	GR-ZMUA_Aves-1770-1365	Spielter T. W.	1			Whole animal (Stuffed)	1861	1770	India	GR	India Or.	Coordninates for India	23.7268	83.8993	2005716	Shogolev Igor	urn:lsid:catalogueoflife.org:taxon:e7db4c08-18fd-11e5-9774-bc764e0806fb:col20150807	Pycnonotus zeylanicus	Animalia	Chordata	Aves	Passeriformes	Pycnonotidae	Pycnonotus	zeylanicus	(Gmelin, 1789)	ICZN	Pycnonotus zeylanicus
ZMUA	AVSE	ZMUA_Aves	ZMUA	PreservedSpecimen	1397-992	GR-ZMUA_Aves-1397-992	Spielter T. W.	1			Whole animal (Stuffed)	1861	1397	India	GR	India Or.	Coordninates for India	23.7268	83.8993	2005716	Shogolev Igor	urn:lsid:catalogueoflife.org:taxon:f18b57e5-18fd-11e5-9774-bc764e0806fb:col20150807	Rhopodytes sumatranus	Animalia	Chordata	Aves	Cuculiformes	Cuculidae	Rhopodytes	sumatranus	(Raffles, 1822)	ICZN	Phaenicophaeus sumatranus Raffles, 1822
ZMUA	AVSE	ZMUA_Aves	ZMUA	PreservedSpecimen	2349-1944	GR-ZMUA_Aves-2349-1944	Spielter T. W.	1			Whole animal (Stuffed)	1861	2349	India	GR	India Or.	Coordninates for India	23.7268	83.8993	2005716	Shogolev Igor	urn:lsid:catalogueoflife.org:taxon:e7b23276-18fd-11e5-9774-bc764e0806fb:col20150807	Saltator similis	Animalia	Chordata	Aves	Passeriformes	Cardinalidae	Saltator	similis	Orbigny & Lafresnaye, 1837	ICZN	Saltator similis
ZMUA	AVSE	ZMUA_Aves	ZMUA	PreservedSpecimen	860-455	GR-ZMUA_Aves-860-455	Spielter T. W.	1	M	adult	Whole animal (Stuffed)	1861	860	India	GR	India Or.	Coordninates for India	23.7268	83.8993	2005716	Shogolev Igor	urn:lsid:catalogueoflife.org:taxon:ea04c7d3-18fd-11e5-9774-bc764e0806fb:col20150807	Treron olax	Animalia	Chordata	Aves	Columbiformes	Columbidae	Treron	olax	(Temminck, 1823)	ICZN	Treron olax Temm. 1823
ZMUA	AVSE	ZMUA_Aves	ZMUA	PreservedSpecimen	1355-950	GR-ZMUA_Aves-1355-950	Spielter T. W.	1			Whole animal (Stuffed)	1861	1355	India	GR	India Or.	Coordninates for India	23.7268	83.8993	2005716	Shogolev Igor	urn:lsid:catalogueoflife.org:taxon:e7b85ef5-18fd-11e5-9774-bc764e0806fb:col20150807	Platysmurus leucopterus	Animalia	Chordata	Aves	Passeriformes	Corvidae	Platysmurus	leucopterus	(Temminck, 1824)	ICZN	Platysmurus leucopterus
ZMUA	AVSE	ZMUA_Aves	ZMUA	PreservedSpecimen	2054-1649	GR-ZMUA_Aves-2054-1649	Spielter T. W.	1			Whole animal (Stuffed)	1861	2054	India	GR	India Or.	Coordninates for India	23.7268	83.8993	2005716	Shogolev Igor	urn:lsid:catalogueoflife.org:taxon:e7b85ef5-18fd-11e5-9774-bc764e0806fb:col20150807	Platysmurus leucopterus	Animalia	Chordata	Aves	Passeriformes	Corvidae	Platysmurus	leucopterus	(Temminck, 1824)	ICZN	Platysmurus leucopterus
ZMUA	AVSE	ZMUA_Aves	ZMUA	PreservedSpecimen	2041-1636	GR-ZMUA_Aves-2041-1636	Spielter T. W.	1			Whole animal (Stuffed)	1861	2041	India	GR	India Or.	Coordninates for India	23.7268	83.8993	2005716	Shogolev Igor	urn:lsid:catalogueoflife.org:taxon:e7b9a98e-18fd-11e5-9774-bc764e0806fb:col20150623	Dicrurus adsimilis	Animalia	Chordata	Aves	Passeriformes	Dicruridae	Dicrurus	adsimilis	(Bechstein, 1794)	ICZN	Dicrurus adsimilis
ZMUA	AVSE	ZMUA_Aves	ZMUA	PreservedSpecimen	2631-2226	GR-ZMUA_Aves-2631-2226	Spielter T. W.	1			Whole animal (Stuffed)	1861	2631	India	GR	India Or.	Coordninates for India	23.7268	83.8993	2005716	Shogolev Igor	urn:lsid:catalogueoflife.org:taxon:e7b9a98e-18fd-11e5-9774-bc764e0806fb:col20150623	Dicrurus adsimilis	Animalia	Chordata	Aves	Passeriformes	Dicruridae	Dicrurus	adsimilis	(Bechstein, 1794)	ICZN	Dicrurus adsimilis
ZMUA	AVSE	ZMUA_Aves	ZMUA	PreservedSpecimen	2038-1633	GR-ZMUA_Aves-2038-1633	Spielter T. W.	1			Whole animal (Stuffed)	1861	2038	India	GR	India Or.	Coordninates for India	23.7268	83.8993	2005716	Shogolev Igor	urn:lsid:catalogueoflife.org:taxon:e7b9658f-18fd-11e5-9774-bc764e0806fb:col20150623	Dicrurus macrocercus	Animalia	Chordata	Aves	Passeriformes	Dicruridae	Dicrurus	macrocercus	Vieillot, 1817	ICZN	Dicrurus macrocercus
ZMUA	AVSE	ZMUA_Aves	ZMUA	PreservedSpecimen	2205-1800	GR-ZMUA_Aves-2205-1800	Spielter T. W.	1			Whole animal (Stuffed)	1861	2205	India	GR	India Or.	Coordninates for India	23.7268	83.8993	2005716	Shogolev Igor	urn:lsid:catalogueoflife.org:taxon:e8229a30-18fd-11e5-9774-bc764e0806fb:col20150623	Irena puella	Animalia	Chordata	Aves	Passeriformes	Irenidae	Irena	puella	(Latham, 1790)	ICZN	Irena puella
ZMUA	AVSE	ZMUA_Aves	ZMUA	PreservedSpecimen	2189-1784	GR-ZMUA_Aves-2189-1784	Spielter T. W.	1			Whole animal (Stuffed)	1861	2189	India	GR	India Or.	Coordninates for India	23.7268	83.8993	2005716	Shogolev Igor	urn:lsid:catalogueoflife.org:taxon:e6e657c2-18fd-11e5-9774-bc764e0806fb:col20150623	Alophoixus flaveolus	Animalia	Chordata	Aves	Passeriformes	Pycnonotidae	Alophoixus	flaveolus	(Gould, 1836)	ICZN	Alaphoixus flaveolus
ZMUA	AVSE	ZMUA_Aves	ZMUA	PreservedSpecimen	2238-1833	GR-ZMUA_Aves-2238-1833	Spielter T. W.	1			Whole animal (Stuffed)	1861	2238	India	GR	India Or.	Coordninates for India	23.7268	83.8993	2005716	Shogolev Igor	urn:lsid:catalogueoflife.org:taxon:e6e657c2-18fd-11e5-9774-bc764e0806fb:col20150623	Alophoixus flaveolus	Animalia	Chordata	Aves	Passeriformes	Pycnonotidae	Alophoixus	flaveolus	(Gould, 1836)	ICZN	Alophoixus flaveolus
ZMUA	AVSE	ZMUA_Aves	ZMUA	PreservedSpecimen	2381-1976	GR-ZMUA_Aves-2381-1976	Spielter T. W.	1			Whole animal (Stuffed)	1861	2381	India	GR	India Or.	Coordninates for India	23.7268	83.8993	2005716	Shogolev Igor	urn:lsid:catalogueoflife.org:taxon:e7db7c25-18fd-11e5-9774-bc764e0806fb:col20150807	Pycnonotus atriceps	Animalia	Chordata	Aves	Passeriformes	Pycnonotidae	Pycnonotus	atriceps	(Temminck, 1822)	ICZN	Pycnonotus atriceps
ZMUA	AVSE	ZMUA_Aves	ZMUA	PreservedSpecimen	2382-1977	GR-ZMUA_Aves-2382-1977	Spielter T. W.	1			Whole animal (Stuffed)	1861	2382	India	GR	India Or.	Coordninates for India	23.7268	83.8993	2005716	Shogolev Igor	urn:lsid:catalogueoflife.org:taxon:e7db7c25-18fd-11e5-9774-bc764e0806fb:col20150807	Pycnonotus atriceps	Animalia	Chordata	Aves	Passeriformes	Pycnonotidae	Pycnonotus	atriceps	(Temminck, 1822)	ICZN	Pycnonotus atriceps
ZMUA	AVSE	ZMUA_Aves	ZMUA	PreservedSpecimen	2295-1890	GR-ZMUA_Aves-2295-1890	Spielter T. W.	1			Whole animal (Stuffed)	1861	2295	India	GR	India Or.	Coordninates for India	23.7268	83.8993	2005716	Shogolev Igor	urn:lsid:catalogueoflife.org:taxon:e7db61fa-18fd-11e5-9774-bc764e0806fb:col20150807	Pycnonotus melanoleucos	Animalia	Chordata	Aves	Passeriformes	Pycnonotidae	Pycnonotus	melanoleucos	(Eyton, 1839)	ICZN	Pycnonotus melanoleuca
ZMUA	AVSE	ZMUA_Aves	ZMUA	PreservedSpecimen	2299-1894	GR-ZMUA_Aves-2299-1894	Spielter T. W.	1			Whole animal (Stuffed)	1861	2299	India	GR	India Or.	Coordninates for India	23.7268	83.8993	2005716	Shogolev Igor	urn:lsid:catalogueoflife.org:taxon:e7db61fa-18fd-11e5-9774-bc764e0806fb:col20150807	Pycnonotus melanoleucos	Animalia	Chordata	Aves	Passeriformes	Pycnonotidae	Pycnonotus	melanoleucos	(Eyton, 1839)	ICZN	Pycnonotus melanoleucus
ZMUA	AVSE	ZMUA_Aves	ZMUA	PreservedSpecimen	1199-794	GR-ZMUA_Aves-1199-794	Spielter T. W.	1			Whole animal (Stuffed)	1861	1199	India	GR	India Or.	Coordninates for India	23.7268	83.8993	2005716	Shogolev Igor	urn:lsid:catalogueoflife.org:taxon:ede219f4-18fd-11e5-9774-bc764e0806fb:col20150623	Caloramphus fuliginosus	Animalia	Chordata	Aves	Piciformes	Ramphastidae	Caloramphus	fuliginosus	(Temminck, 1830)	ICZN	Calorhamphus fuliginosus
ZMUA	AVSE	ZMUA_Aves	ZMUA	PreservedSpecimen	1202-797	GR-ZMUA_Aves-1202-797	Spielter T. W.	1			Whole animal (Stuffed)	1861	1202	India	GR	India Or.	Coordninates for India	23.7268	83.8993	2005716	Shogolev Igor	urn:lsid:catalogueoflife.org:taxon:ede21df0-18fd-11e5-9774-bc764e0806fb:col20150730	Megalaima australis	Animalia	Chordata	Aves	Piciformes	Ramphastidae	Megalaima	australis	(Horsfield, 1821)	ICZN	Megalaima australis
ZMUA	AVSE	ZMUA_Aves	ZMUA	PreservedSpecimen	1215-810	GR-ZMUA_Aves-1215-810	Spielter T. W.	1			Whole animal (Stuffed)	1861	1215	India	GR	India Or.	Coordninates for India	23.7268	83.8993	2005716	Shogolev Igor	urn:lsid:catalogueoflife.org:taxon:ededaaad-18fd-11e5-9774-bc764e0806fb:col20150730	Megalaima henricii	Animalia	Chordata	Aves	Piciformes	Ramphastidae	Megalaima	henricii	(Temminck, 1831)	ICZN	Megalaima henricii
ZMUA	AVSE	ZMUA_Aves	ZMUA	PreservedSpecimen	2243-1838	GR-ZMUA_Aves-2243-1838	Spielter T. W.	1			Whole animal (Stuffed)	1861	2243	India	GR	India Or.	Coordninates for India	23.7268	83.8993	2005716	Shogolev Igor	urn:lsid:catalogueoflife.org:taxon:e6e4ea48-18fd-11e5-9774-bc764e0806fb:col20150623	Aplonis panayensis	Animalia	Chordata	Aves	Passeriformes	Sturnidae	Aplonis	panayensis	(Scopoli, 1786)	ICZN	Aplonis panayensis
ZMUA	AVSE	ZMUA_Aves	ZMUA	PreservedSpecimen	2172-1767	GR-ZMUA_Aves-2172-1767	Spielter T. W.	1			Whole animal (Stuffed)	1861	2172	India	GR	India Or.	Coordninates for India	23.7268	83.8993	2005716	Shogolev Igor	urn:lsid:catalogueoflife.org:taxon:e7c67689-18fd-11e5-9774-bc764e0806fb:col20150807	Turdus feae	Animalia	Chordata	Aves	Passeriformes	Turdidae	Turdus	feae	(Salvadori, 1887)	ICZN	Turdus feae
ZMUA	AVSE	ZMUA_Aves	ZMUA	PreservedSpecimen	2227-1822	GR-ZMUA_Aves-2227-1822	Spielter T. W.	1			Whole animal (Stuffed)	1861	2227	India	GR	India Or.	Coordninates for India	23.7268	83.8993	2005716	Shogolev Igor	urn:lsid:catalogueoflife.org:taxon:e7c67689-18fd-11e5-9774-bc764e0806fb:col20150807	Turdus feae	Animalia	Chordata	Aves	Passeriformes	Turdidae	Turdus	feae	(Salvadori, 1887)	ICZN	Turdus feae
ZMUA	AVSE	ZMUA_Aves	ZMUA	PreservedSpecimen	2176-1771	GR-ZMUA_Aves-2176-1771	Spielter T. W.	1			Whole animal (Stuffed)	1861	2176	India	GR	India Or.	Coordninates for India	23.7268	83.8993	2005716	Shogolev Igor	urn:lsid:catalogueoflife.org:taxon:e7b56fd3-18fd-11e5-9774-bc764e0806fb:col20150807	Turdus obscurus	Animalia	Chordata	Aves	Passeriformes	Turdidae	Turdus	obscurus	Gmelin, 1789	ICZN	Turdus obscurus
ZMUA	AVSE	ZMUA_Aves	ZMUA	PreservedSpecimen	2212-1807	GR-ZMUA_Aves-2212-1807	Spielter T. W.	1			Whole animal (Stuffed)	1861	2212	India	GR	India Or.	Coordninates for India	23.7268	83.8993	2005716	Shogolev Igor	urn:lsid:catalogueoflife.org:taxon:e75d4bcb-18fd-11e5-9774-bc764e0806fb:col20150807	Phylloscartes ventralis	Animalia	Chordata	Aves	Passeriformes	Tyrannidae	Phylloscartes	ventralis	(Temminck, 1824)	ICZN	Phylloscartes ventralis
ZMUA	AVSE	ZMUA_Aves	ZMUA	PreservedSpecimen	1831-1426	GR-ZMUA_Aves-1831-1426	Spielter T. W.	1			Whole animal (Stuffed)	1861	1831	India	GR	India Or.	Coordninates for India	23.7268	83.8993	2005716	Shogolev Igor	urn:lsid:catalogueoflife.org:taxon:e6e4ddc5-18fd-11e5-9774-bc764e0806fb:col20150623	Arachnothera flavigaster	Animalia	Chordata	Aves	Passeriformes	Nectariniidae	Arachnothera	flavigaster	(Eyton, 1839)	ICZN	Arachnothera flavigaster
ZMUA	AVSE	ZMUA_Aves	ZMUA	PreservedSpecimen	1399-994	GR-ZMUA_Aves-1399-994	Touzet N.	1			Whole animal (Stuffed)	1861	1399	Brazil	GR	Brazil	Coordinates according to: http://bl.ocks.org/rdmpage/raw/9951904/	-12.607	-54.423	2281819	Shogolev Igor	urn:lsid:catalogueoflife.org:taxon:ee159ae8-18fd-11e5-9774-bc764e0806fb:col20150623	Crotophaga ani	Animalia	Chordata	Aves	Cuculiformes	Cuculidae	Crotophaga	ani	Linnaeus, 1758	ICZN	Crotophaga ani L. 1758
ZMUA	AVSE	ZMUA_Aves	ZMUA	PreservedSpecimen	2416-2011	GR-ZMUA_Aves-2416-2011	Touzet N.	1			Whole animal (Stuffed)	1861	2416	Brazil	GR	Brazil	Coordinates according to: http://bl.ocks.org/rdmpage/raw/9951904/	-12.607	-54.423	2281819	Shogolev Igor	urn:lsid:catalogueoflife.org:taxon:e7d7bc23-18fd-11e5-9774-bc764e0806fb:col20150623	Corythopis delalandi	Animalia	Chordata	Aves	Passeriformes	Tyrannidae	Corythopis	delalandi	(Lesson, 1831)	ICZN	Corythopis delalandi
ZMUA	AVSE	ZMUA_Aves	ZMUA	PreservedSpecimen	2161-1756	GR-ZMUA_Aves-2161-1756	Touzet N.	1			Whole animal (Stuffed)	1861	2161	Brazil	GR	Brazil	Coordinates according to: http://bl.ocks.org/rdmpage/raw/9951904/	-12.607	-54.423	2281819	Shogolev Igor	urn:lsid:catalogueoflife.org:taxon:28a2f9a4-18fe-11e5-9774-bc764e0806fb:col20150807	Vireo olivaceus chivi	Animalia	Chordata	Aves	Passeriformes	Vireonidae	Vireo	olivaceus	(Vieillot, 1817)	ICZN	Vireo chivi
ZMUA	AVSE	ZMUA_Aves	ZMUA	PreservedSpecimen	881-476	GR-ZMUA_Aves-881-476	Villard C. d.	1			Whole animal (Stuffed)	1861	881	Brazil	GR	Brazil	Coordinates according to: http://bl.ocks.org/rdmpage/raw/9951904/	-12.607	-54.423	2281819	Shogolev Igor	urn:lsid:catalogueoflife.org:taxon:0d19bbd0-18fe-11e5-9774-bc764e0806fb:col20150807	Rupornis magnirostris	Animalia	Chordata	Aves	Accipitriformes	Accipitridae	Rupornis	magnirostris	(Gmelin, 1788)	ICZN	Buteo magnirostris Gmelin, 1788
ZMUA	AVSE	ZMUA_Aves	ZMUA	PreservedSpecimen	846-441	GR-ZMUA_Aves-846-441	Villard C. d.	1			Whole animal (Stuffed)	1861	846	Brazil	GR	Brazil	Coordinates according to: http://bl.ocks.org/rdmpage/raw/9951904/	-12.607	-54.423	2281819	Shogolev Igor	urn:lsid:catalogueoflife.org:taxon:e8678a8f-18fd-11e5-9774-bc764e0806fb:col20150807	Pilherodius pileatus	Animalia	Chordata	Aves	Pelecaniformes	Ardeidae	Pilherodius	pileatus	(Boddaert, 1783)	ICZN	Pitherodius pileatus Boddaert, 1783
ZMUA	AVSE	ZMUA_Aves	ZMUA	PreservedSpecimen	1031-626	GR-ZMUA_Aves-1031-626	Villard C. d.	1			Whole animal (Stuffed)	1861	1031	Brazil	GR	Brazil	Coordinates according to: http://bl.ocks.org/rdmpage/raw/9951904/	-12.607	-54.423	2281819	Shogolev Igor	urn:lsid:catalogueoflife.org:taxon:f6928cd5-18fd-11e5-9774-bc764e0806fb:col20150807	Pulsatrix perspicillata	Animalia	Chordata	Aves	Strigiformes	Strigidae	Pulsatrix	perspicillata	(Latham, 1790)	ICZN	Pulsatrix perspicillata Latham. 1790
ZMUA	AVSE	ZMUA_Aves	ZMUA	PreservedSpecimen	1078-673	GR-ZMUA_Aves-1078-673	Villard C. d.	1			Whole animal (Stuffed)	1861	1078	Brazil	GR	Brazil	Coordinates according to: http://bl.ocks.org/rdmpage/raw/9951904/	-12.607	-54.423	2281819	Shogolev Igor	urn:lsid:catalogueoflife.org:taxon:ee1588fc-18fd-11e5-9774-bc764e0806fb:col20150623	Glaucidium brasilianum	Animalia	Chordata	Aves	Strigiformes	Strigidae	Glaucidium	brasilianum	(Gmelin, 1788)	ICZN	Glaucidium brasilianum J. F. Gmelin, 1788
ZMUA	AVSE	ZMUA_Aves	ZMUA	PreservedSpecimen	1000-595	GR-ZMUA_Aves-1000-595	Villard C. d.	1			Whole animal (Stuffed)	1861	1000	Brazil	GR	Brazil	Coordinates according to: http://bl.ocks.org/rdmpage/raw/9951904/	-12.607	-54.423	2281819	Shogolev Igor	urn:lsid:catalogueoflife.org:taxon:e6ee97e4-18fd-11e5-9774-bc764e0806fb:col20150807	Procnias nudicollis	Animalia	Chordata	Aves	Passeriformes	Cotingidae	Procnias	nudicollis	(Vieillot, 1817)	ICZN	Procnias nudicollis
ZMUA	AVSE	ZMUA_Aves	ZMUA	PreservedSpecimen	1377-972	GR-ZMUA_Aves-1377-972	Villard C. d.	1	M	adult	Whole animal (Stuffed)	1861	1377	Brazil	GR	Brazil	Coordinates according to: http://bl.ocks.org/rdmpage/raw/9951904/	-12.607	-54.423	2281819	Shogolev Igor	urn:lsid:catalogueoflife.org:taxon:f8158535-18fd-11e5-9774-bc764e0806fb:col20150623	Crotophaga major	Animalia	Chordata	Aves	Cuculiformes	Cuculidae	Crotophaga	major	Gmelin, 1788	ICZN	Crotophaga major J. F. Gmelin 1788
ZMUA	AVSE	ZMUA_Aves	ZMUA	PreservedSpecimen	1543-1138	GR-ZMUA_Aves-1543-1138	Villard C. d.	1			Whole animal (Stuffed)	1861	1543	Brazil	GR	Brazil	Coordinates according to: http://bl.ocks.org/rdmpage/raw/9951904/	-12.607	-54.423	2281819	Shogolev Igor	urn:lsid:catalogueoflife.org:taxon:e7d3c30f-18fd-11e5-9774-bc764e0806fb:col20150807	Tachycineta albiventer	Animalia	Chordata	Aves	Passeriformes	Hirundinidae	Tachycineta	albiventer	(Boddaert, 1783)	ICZN	Tachycineta albiventer
ZMUA	AVSE	ZMUA_Aves	ZMUA	PreservedSpecimen	1616-1211	GR-ZMUA_Aves-1616-1211	Villard C. d.	1	F	adult	Whole animal (Stuffed)	1861	1616	Brazil	GR	Brazil	Coordinates according to: http://bl.ocks.org/rdmpage/raw/9951904/	-12.607	-54.423	2281819	Shogolev Igor	urn:lsid:catalogueoflife.org:taxon:edf98327-18fd-11e5-9774-bc764e0806fb:col20150730	Malacoptila striata	Animalia	Chordata	Aves	Galbuliformes	Bucconidae	Malacoptila	striata	(Spix, 1824)	ICZN	Malacoptila striata
ZMUA	AVSE	ZMUA_Aves	ZMUA	PreservedSpecimen	1657-1252	GR-ZMUA_Aves-1657-1252	Villard C. d.	1	M	adult	Whole animal (Stuffed)	1861	1657	Brazil	GR	Brazil	Coordinates according to: http://bl.ocks.org/rdmpage/raw/9951904/	-12.607	-54.423	2281819	Shogolev Igor	urn:lsid:catalogueoflife.org:taxon:fbaf56d4-18fd-11e5-9774-bc764e0806fb:col20150807	Notharchus macrorhynchos	Animalia	Chordata	Aves	Galbuliformes	Bucconidae	Notharchus	macrorhynchos	(Gmelin, 1788)	ICZN	Notharchus macrorhynchus
ZMUA	AVSE	ZMUA_Aves	ZMUA	PreservedSpecimen	1658-1253	GR-ZMUA_Aves-1658-1253	Villard C. d.	1			Whole animal (Stuffed)	1861	1658	Brazil	GR	Brazil	Coordinates according to: http://bl.ocks.org/rdmpage/raw/9951904/	-12.607	-54.423	2281819	Shogolev Igor	urn:lsid:catalogueoflife.org:taxon:fbaf56d4-18fd-11e5-9774-bc764e0806fb:col20150807	Notharchus macrorhynchos	Animalia	Chordata	Aves	Galbuliformes	Bucconidae	Notharchus	macrorhynchos	(Gmelin, 1788)	ICZN	Notharchus macrorhynchus
ZMUA	AVSE	ZMUA_Aves	ZMUA	PreservedSpecimen	1614-1209	GR-ZMUA_Aves-1614-1209	Villard C. d.	1	F	adult	Whole animal (Stuffed)	1861	1614	Brazil	GR	Brazil	Coordinates according to: http://bl.ocks.org/rdmpage/raw/9951904/	-12.607	-54.423	2281819	Shogolev Igor	urn:lsid:catalogueoflife.org:taxon:edf98327-18fd-11e5-9774-bc764e0806fb:col20150730	Malacoptila striata	Animalia	Chordata	Aves	Galbuliformes	Bucconidae	Malacoptila	striata	(Spix, 1824)	ICZN	Malacoptila striata
ZMUA	AVSE	ZMUA_Aves	ZMUA	PreservedSpecimen	481-76	GR-ZMUA_Aves-481-76	Villard C. d.	1			Whole animal (Stuffed)	1861	481	Brazil	GR	Brazil	Coordinates according to: http://bl.ocks.org/rdmpage/raw/9951904/	-12.607	-54.423	2281819	Shogolev Igor	urn:lsid:catalogueoflife.org:taxon:0d19bbd0-18fe-11e5-9774-bc764e0806fb:col20150807	Rupornis magnirostris	Animalia	Chordata	Aves	Accipitriformes	Accipitridae	Rupornis	magnirostris	(Gmelin, 1788)	ICZN	Buteo magnirostris Gmelin, 1788
ZMUA	AVSE	ZMUA_Aves	ZMUA	PreservedSpecimen	1228-823	GR-ZMUA_Aves-1228-823	Villard C. d.	1	M	adult	Whole animal (Stuffed)	1861	1228	Brazil	GR	Brazil	Coordinates according to: http://bl.ocks.org/rdmpage/raw/9951904/	-12.607	-54.423	2281819	Shogolev Igor	urn:lsid:catalogueoflife.org:taxon:edee10ea-18fd-11e5-9774-bc764e0806fb:col20150623	Celeus flavescens	Animalia	Chordata	Aves	Piciformes	Picidae	Celeus	flavescens	(Gmelin, 1788)	ICZN	Celeus flavescens
ZMUA	AVSE	ZMUA_Aves	ZMUA	PreservedSpecimen	598-193	GR-ZMUA_Aves-598-193	Villard C. d.	1	F	adult	Whole animal (Stuffed)	1861	598	Brazil	GR	Brazil	Coordinates according to: http://bl.ocks.org/rdmpage/raw/9951904/	-12.607	-54.423	2281819	Shogolev Igor	urn:lsid:catalogueoflife.org:taxon:edee2395-18fd-11e5-9774-bc764e0806fb:col20150623	Colaptes melanochloros	Animalia	Chordata	Aves	Piciformes	Picidae	Colaptes	melanochloros	(Gmelin, 1788)	ICZN	Chrysoptilus melanochloros
ZMUA	AVSE	ZMUA_Aves	ZMUA	PreservedSpecimen	1978-1573	GR-ZMUA_Aves-1978-1573	Villard C. d.	1			Whole animal (Stuffed)	1861	1978	Brazil	GR	Brazil	Coordinates according to: http://bl.ocks.org/rdmpage/raw/9951904/	-12.607	-54.423	2281819	Shogolev Igor	urn:lsid:catalogueoflife.org:taxon:e81c25ea-18fd-11e5-9774-bc764e0806fb:col20150623	Caryothraustes canadensis	Animalia	Chordata	Aves	Passeriformes	Cardinalidae	Caryothraustes	canadensis	(Linnaeus, 1766)	ICZN	Caryothraustes canadensis
ZMUA	AVSE	ZMUA_Aves	ZMUA	PreservedSpecimen	603-198	GR-ZMUA_Aves-603-198	Villard C. d.	1			Whole animal (Stuffed)	1861	603	Brazil	GR	Brazil	Coordinates according to: http://bl.ocks.org/rdmpage/raw/9951904/	-12.607	-54.423	2281819	Shogolev Igor	urn:lsid:catalogueoflife.org:taxon:ee20bf57-18fd-11e5-9774-bc764e0806fb:col20150807	Pyrrhura cruentata	Animalia	Chordata	Aves	Psittaciformes	Psittacidae	Pyrrhura	cruentata	(Wied-Neuwied, 1820)	ICZN	Pyrrhura cruentata Wied, 1820
ZMUA	AVSE	ZMUA_Aves	ZMUA	PreservedSpecimen	1292-887	GR-ZMUA_Aves-1292-887	Villard C. d.	1			Whole animal (Stuffed)	1861	1292	Brazil	GR	Brazil	Coordinates according to: http://bl.ocks.org/rdmpage/raw/9951904/	-12.607	-54.423	2281819	Shogolev Igor	urn:lsid:catalogueoflife.org:taxon:ee1e1981-18fd-11e5-9774-bc764e0806fb:col20150623	Brotogeris tirica	Animalia	Chordata	Aves	Psittaciformes	Psittacidae	Brotogeris	tirica	(Gmelin, 1788)	ICZN	Brotogeris tirica J. F. Gmelin, 1788
ZMUA	AVSE	ZMUA_Aves	ZMUA	PreservedSpecimen	1293-888	GR-ZMUA_Aves-1293-888	Villard C. d.	1			Whole animal (Stuffed)	1861	1293	Brazil	GR	Brazil	Coordinates according to: http://bl.ocks.org/rdmpage/raw/9951904/	-12.607	-54.423	2281819	Shogolev Igor	urn:lsid:catalogueoflife.org:taxon:ee1e1981-18fd-11e5-9774-bc764e0806fb:col20150623	Brotogeris tirica	Animalia	Chordata	Aves	Psittaciformes	Psittacidae	Brotogeris	tirica	(Gmelin, 1788)	ICZN	Brotogeris tirica J. F. Gmelin, 1788
ZMUA	AVSE	ZMUA_Aves	ZMUA	PreservedSpecimen	1310-905	GR-ZMUA_Aves-1310-905	Villard C. d.	1		adult	Whole animal (Stuffed)	1861	1310	Brazil	GR	Brazil	Coordinates according to: http://bl.ocks.org/rdmpage/raw/9951904/	-12.607	-54.423	2281819	Shogolev Igor	urn:lsid:catalogueoflife.org:taxon:ee20c39d-18fd-11e5-9774-bc764e0806fb:col20150807	Pyrrhura frontalis	Animalia	Chordata	Aves	Psittaciformes	Psittacidae	Pyrrhura	frontalis	(Vieillot, 1818)	ICZN	Pyrrhura frontalis Vieillot, 1818
ZMUA	AVSE	ZMUA_Aves	ZMUA	PreservedSpecimen	1190-785	GR-ZMUA_Aves-1190-785	Villard C. d.	1			Whole animal (Stuffed)	1861	1190	Brazil	GR	Brazil	Coordinates according to: http://bl.ocks.org/rdmpage/raw/9951904/	-12.607	-54.423	2281819	Shogolev Igor	urn:lsid:catalogueoflife.org:taxon:fbbec4ff-18fd-11e5-9774-bc764e0806fb:col20150623	Baillonius bailloni	Animalia	Chordata	Aves	Piciformes	Ramphastidae	Baillonius	bailloni	(Vieillot, 1819)	ICZN	Baillonius bailloni
ZMUA	AVSE	ZMUA_Aves	ZMUA	PreservedSpecimen	1002-597	GR-ZMUA_Aves-1002-597	Villard C. d.	1			Whole animal (Stuffed)	1861	1002	Brazil	GR	Brazil	Coordinates according to: http://bl.ocks.org/rdmpage/raw/9951904/	-12.607	-54.423	2281819	Shogolev Igor	urn:lsid:catalogueoflife.org:taxon:e7bacb3b-18fd-11e5-9774-bc764e0806fb:col20150807	Rupicola rupicola	Animalia	Chordata	Aves	Passeriformes	Cotingidae	Rupicola	rupicola	(Linnaeus, 1766)	ICZN	Rupicola rupicola
ZMUA	AVSE	ZMUA_Aves	ZMUA	PreservedSpecimen	1086-681	GR-ZMUA_Aves-1086-681	Villard C. d.	1	M	adult	Whole animal (Stuffed)	1861	1086	Brazil	GR	Brazil	Coordinates according to: http://bl.ocks.org/rdmpage/raw/9951904/	-12.607	-54.423	2281819	Shogolev Igor	urn:lsid:catalogueoflife.org:taxon:0d19bbd0-18fe-11e5-9774-bc764e0806fb:col20150807	Rupornis magnirostris	Animalia	Chordata	Aves	Accipitriformes	Accipitridae	Rupornis	magnirostris	(Gmelin, 1788)	ICZN	Buteo magnirostris Gmelin, 1788
ZMUA	AVSE	ZMUA_Aves	ZMUA	PreservedSpecimen	1195-790	GR-ZMUA_Aves-1195-790	Villard C. d.	1	F	adult	Whole animal (Stuffed)	1861	1195	Brazil	GR	Brazil	Coordinates according to: http://bl.ocks.org/rdmpage/raw/9951904/	-12.607	-54.423	2281819	Shogolev Igor	urn:lsid:catalogueoflife.org:taxon:fbbeafdd-18fd-11e5-9774-bc764e0806fb:col20150807	Selenidera maculirostris	Animalia	Chordata	Aves	Piciformes	Ramphastidae	Selenidera	maculirostris	(Lichtenstein, 1823)	ICZN	Selenidera maculirostris
ZMUA	AVSE	ZMUA_Aves	ZMUA	PreservedSpecimen	1196-791	GR-ZMUA_Aves-1196-791	Villard C. d.	1	M	adult	Whole animal (Stuffed)	1861	1196	Brazil	GR	Brazil	Coordinates according to: http://bl.ocks.org/rdmpage/raw/9951904/	-12.607	-54.423	2281819	Shogolev Igor	urn:lsid:catalogueoflife.org:taxon:fbbeafdd-18fd-11e5-9774-bc764e0806fb:col20150807	Selenidera maculirostris	Animalia	Chordata	Aves	Piciformes	Ramphastidae	Selenidera	maculirostris	(Lichtenstein, 1823)	ICZN	Selenidera maculirostris
ZMUA	AVSE	ZMUA_Aves	ZMUA	PreservedSpecimen	1298-893	GR-ZMUA_Aves-1298-893	Villard C. d.	1			Whole animal (Stuffed)	1861	1298	Brazil	GR	Brazil	Coordinates according to: http://bl.ocks.org/rdmpage/raw/9951904/	-12.607	-54.423	2281819	Shogolev Igor	urn:lsid:catalogueoflife.org:taxon:fb6a2ad2-18fd-11e5-9774-bc764e0806fb:col20150623	Aratinga leucophthalma	Animalia	Chordata	Aves	Psittaciformes	Psittacidae	Aratinga	leucophthalma	(Statius Muller, 1776)	ICZN	Aratinga leucopthalmus Muller.,1776
ZMUA	AVSE	ZMUA_Aves	ZMUA	PreservedSpecimen	1656-1251	GR-ZMUA_Aves-1656-1251	Villard C. d.	1			Whole animal (Stuffed)	1861	1656	Brazil	GR	Brazil	Coordinates according to: http://bl.ocks.org/rdmpage/raw/9951904/	-12.607	-54.423	2281819	Shogolev Igor	urn:lsid:catalogueoflife.org:taxon:ee1cd6be-18fd-11e5-9774-bc764e0806fb:col20150807	Streptoprocne zonaris	Animalia	Chordata	Aves	Apodiformes	Apodidae	Streptoprocne	zonaris	(Shaw, 1796)	ICZN	Streptoprocne zonaris
ZMUA	AVSE	ZMUA_Aves	ZMUA	PreservedSpecimen	1179-774	GR-ZMUA_Aves-1179-774	Villard C. d.	1			Whole animal (Stuffed)	1861	1179	Brazil	GR	Brazil	Coordinates according to: http://bl.ocks.org/rdmpage/raw/9951904/	-12.607	-54.423	2281819	Shogolev Igor	urn:lsid:catalogueoflife.org:taxon:f81573c7-18fd-11e5-9774-bc764e0806fb:col20150807	Neomorphus geoffroyi	Animalia	Chordata	Aves	Cuculiformes	Cuculidae	Neomorphus	geoffroyi	(Temminck, 1820)	ICZN	Neomorphus geoffroyi Temmick, 1820
ZMUA	AVSE	ZMUA_Aves	ZMUA	PreservedSpecimen	2380-1975	GR-ZMUA_Aves-2380-1975	Villard C. d.	1			Whole animal (Stuffed)	1861	2380	Brazil	GR	Brazil	Coordinates according to: http://bl.ocks.org/rdmpage/raw/9951904/	-12.607	-54.423	2281819	Shogolev Igor	urn:lsid:catalogueoflife.org:taxon:e7b2414c-18fd-11e5-9774-bc764e0806fb:col20150807	Poospiza thoracica	Animalia	Chordata	Aves	Passeriformes	Emberizidae	Poospiza	thoracica	(Nordmann, 1835)	ICZN	Poospiza thoracica
ZMUA	AVSE	ZMUA_Aves	ZMUA	PreservedSpecimen	2531-2126	GR-ZMUA_Aves-2531-2126	Villard C. d.	1			Whole animal (Stuffed)	1861	2531	Brazil	GR	Brazil	Coordinates according to: http://bl.ocks.org/rdmpage/raw/9951904/	-12.607	-54.423	2281819	Shogolev Igor	urn:lsid:catalogueoflife.org:taxon:e7b2414c-18fd-11e5-9774-bc764e0806fb:col20150807	Poospiza thoracica	Animalia	Chordata	Aves	Passeriformes	Emberizidae	Poospiza	thoracica	(Nordmann, 1835)	ICZN	Poospiza thoracica
ZMUA	AVSE	ZMUA_Aves	ZMUA	PreservedSpecimen	2348-1943	GR-ZMUA_Aves-2348-1943	Villard C. d.	1			Whole animal (Stuffed)	1861	2348	Brazil	GR	Brazil	Coordinates according to: http://bl.ocks.org/rdmpage/raw/9951904/	-12.607	-54.423	2281819	Shogolev Igor	urn:lsid:catalogueoflife.org:taxon:e7d5c170-18fd-11e5-9774-bc764e0806fb:col20150623	Cissopis leverianus	Animalia	Chordata	Aves	Passeriformes	Thraupidae	Cissopis	leverianus	(Gmelin, 1788)	ICZN	Cissopis leveriana
ZMUA	AVSE	ZMUA_Aves	ZMUA	PreservedSpecimen	2630-2225	GR-ZMUA_Aves-2630-2225	Villard C. d.	1			Whole animal (Stuffed)	1861	2630	Brazil	GR	Brazil	Coordinates according to: http://bl.ocks.org/rdmpage/raw/9951904/	-12.607	-54.423	2281819	Shogolev Igor	urn:lsid:catalogueoflife.org:taxon:e8217c3a-18fd-11e5-9774-bc764e0806fb:col20150623	Hemithraupis flavicollis	Animalia	Chordata	Aves	Passeriformes	Thraupidae	Hemithraupis	flavicollis	(Vieillot, 1818)	ICZN	Hemithraupis flavicollis
ZMUA	AVSE	ZMUA_Aves	ZMUA	PreservedSpecimen	2627-2222	GR-ZMUA_Aves-2627-2222	Villard C. d.	1			Whole animal (Stuffed)	1861	2627	Brazil	GR	Brazil	Coordinates according to: http://bl.ocks.org/rdmpage/raw/9951904/	-12.607	-54.423	2281819	Shogolev Igor	urn:lsid:catalogueoflife.org:taxon:e7d3bc68-18fd-11e5-9774-bc764e0806fb:col20150807	Tachyphonus coronatus	Animalia	Chordata	Aves	Passeriformes	Thraupidae	Tachyphonus	coronatus	(Vieillot, 1822)	ICZN	Tachyphonus coronatus
ZMUA	AVSE	ZMUA_Aves	ZMUA	PreservedSpecimen	2386-1981	GR-ZMUA_Aves-2386-1981	Villard C. d.	1			Whole animal (Stuffed)	1861	2386	Brazil	GR	Brazil	Coordinates according to: http://bl.ocks.org/rdmpage/raw/9951904/	-12.607	-54.423	2281819	Shogolev Igor	urn:lsid:catalogueoflife.org:taxon:e7d3bb1e-18fd-11e5-9774-bc764e0806fb:col20150807	Tachyphonus cristatus	Animalia	Chordata	Aves	Passeriformes	Thraupidae	Tachyphonus	cristatus	(Linnaeus, 1766)	ICZN	Tachyphonus cristatus
ZMUA	AVSE	ZMUA_Aves	ZMUA	PreservedSpecimen	629-224	GR-ZMUA_Aves-629-224	Villard C. d.	1	F	adult	Whole animal (Stuffed)	1861	629	Brazil	GR	Brazil	Coordinates according to: http://bl.ocks.org/rdmpage/raw/9951904/	-12.607	-54.423	2281819	Shogolev Igor	urn:lsid:catalogueoflife.org:taxon:e8678947-18fd-11e5-9774-bc764e0806fb:col20150623	Cochlearius cochlearius	Animalia	Chordata	Aves	Pelecaniformes	Ardeidae	Cochlearius	cochlearius	(Linnaeus, 1766)	ICZN	Cochlearius cochlearius L., 1766
ZMUA	AVSE	ZMUA_Aves	ZMUA	PreservedSpecimen	599-194	GR-ZMUA_Aves-599-194	E.T.T.E.	1	F	adult	Whole animal (Stuffed)	1861	599	Greece	GR	Attica	Coordinates according to: http://bl.ocks.org/rdmpage/raw/9951904/	37.9789	23.6696	50004	Shogolev Igor	urn:lsid:catalogueoflife.org:taxon:f920e9bd-18fd-11e5-9774-bc764e0806fb:col20150807	Tachybaptus ruficollis	Animalia	Chordata	Aves	Podicipediformes	Podicipedidae	Tachybaptus	ruficollis	(Pallas, 1764)	ICZN	Podiceps ruficollis (Pall.)
ZMUA	AVSE	ZMUA_Aves	ZMUA	PreservedSpecimen	1579-1174	GR-ZMUA_Aves-1579-1174	E.T.T.E.	1			Whole animal (Stuffed)	1861	1579		GR	India	Coordinates according to: http://www.davidrumsey.com/luna/servlet/detail/RUMSEY~8~1~209897~5003705:India-?showTip=false&showTipAdvancedSearch=false&title=Search+Results%3A+List_No+equal+to+%271550.100%27&thumbnailViewUrlKey=link.view.search.url&helpUrl=http%3A%2F%2Fdoc.lunaimaging.com%2Fdisplay%2FV71D%2FLUNA%2BViewer%23LUNAViewer-LUNAViewer&fullTextSearchChecked=&advancedSearchUrl=http%3A%2F%2Fdo…	23.7268	83.8993	2005716	Shogolev Igor	urn:lsid:catalogueoflife.org:taxon:fbb911c0-18fd-11e5-9774-bc764e0806fb:col20150623	Ceryle rudis	Animalia	Chordata	Aves	Coraciiformes	Alcedinidae	Ceryle	rudis	(Linnaeus, 1758)	ICZN	Ceryle rudis L. 1758
ZMUA	AVSE	ZMUA_Aves	ZMUA	Occurrence	D25-2919	GR-ZMUA_Aves-D25-2919		1			Specimen unavailable	1861	D25	India	GR	India Or.	Coordninates for India	23.7268	83.8993	2005716				Animalia	Chordata	Aves	Passeriformes					ICZN	Passeriformes
ZMUA	AVSE	ZMUA_Aves	ZMUA	PreservedSpecimen	2520-2115	GR-ZMUA_Aves-2520-2115		1	M	juvenile	Whole animal (Stuffed)	1861	2520	Greece	GR	Attica	Coordinates according to: http://bl.ocks.org/rdmpage/raw/9951904/	37.9789	23.6696	50004	Shogolev Igor	urn:lsid:catalogueoflife.org:taxon:e8670122-18fd-11e5-9774-bc764e0806fb:col20150623	Anas querquedula	Animalia	Chordata	Aves	Anseriformes	Anatidae	Anas	querquedula	Linnaeus, 1758	ICZN	Anas querquedula L.
ZMUA	AVSE	ZMUA_Aves	ZMUA	PreservedSpecimen	909-504	GR-ZMUA_Aves-909-504		1	M	adult	Whole animal (Stuffed)	1861	909	Greece	GR	Attica	Coordinates according to: http://bl.ocks.org/rdmpage/raw/9951904/	37.9789	23.6696	50004	Shogolev Igor	urn:lsid:catalogueoflife.org:taxon:e867e9ec-18fd-11e5-9774-bc764e0806fb:col20150807	Phalacrocorax carbo	Animalia	Chordata	Aves	Suliformes	Phalacrocoracidae	Phalacrocorax	carbo	(Linnaeus, 1758)	ICZN	Phalacrocorax carbo Linnaeus
ZMUA	AVSE	ZMUA_Aves	ZMUA	PreservedSpecimen	2771-2366	GR-ZMUA_Aves-2771-2366		1	M	adult	Whole animal (Stuffed)	1861	2771	Greece	GR	Attica	Coordinates according to: http://bl.ocks.org/rdmpage/raw/9951904/	37.9789	23.6696	50004	Shogolev Igor	urn:lsid:catalogueoflife.org:taxon:fbbee816-18fd-11e5-9774-bc764e0806fb:col20150807	Numenius arquata	Animalia	Chordata	Aves	Charadriiformes	Scolopacidae	Numenius	arquata	(Linnaeus, 1758)	ICZN	Numenius arquata (L.), 1758
ZMUA	AVSE	ZMUA_Aves	ZMUA	PreservedSpecimen	2744-2339	GR-ZMUA_Aves-2744-2339		1	F	adult	Whole animal (Stuffed)	1861	2744	Greece	GR	Attica	Coordinates according to: http://bl.ocks.org/rdmpage/raw/9951904/	37.9789	23.6696	50004	Shogolev Igor	urn:lsid:catalogueoflife.org:taxon:ee1d0d3f-18fd-11e5-9774-bc764e0806fb:col20150807	Tringa totanus	Animalia	Chordata	Aves	Charadriiformes	Scolopacidae	Tringa	totanus	(Linnaeus, 1758)	ICZN	Tringa totanus L.
ZMUA	AVSE	ZMUA_Aves	ZMUA	PreservedSpecimen	2742-2337	GR-ZMUA_Aves-2742-2337		1			Whole animal (Stuffed)	1861	2742	Greece	GR	Attica	Coordinates according to: http://bl.ocks.org/rdmpage/raw/9951904/	37.9789	23.6696	50004	Shogolev Igor	urn:lsid:catalogueoflife.org:taxon:ee1d0be0-18fd-11e5-9774-bc764e0806fb:col20150807	Tringa erythropus	Animalia	Chordata	Aves	Charadriiformes	Scolopacidae	Tringa	erythropus	(Pallas, 1764)	ICZN	Trynga erythropus (Pall.)
ZMUA	AVSE	ZMUA_Aves	ZMUA	PreservedSpecimen	659-254	GR-ZMUA_Aves-659-254		1	M	adult	Whole animal (Stuffed)	1861	659	Greece	GR	Attica	Coordinates according to: http://bl.ocks.org/rdmpage/raw/9951904/	37.9789	23.6696	50004	Shogolev Igor	urn:lsid:catalogueoflife.org:taxon:fb5dd017-18fd-11e5-9774-bc764e0806fb:col20150623	Calidris ferruginea	Animalia	Chordata	Aves	Charadriiformes	Scolopacidae	Calidris	ferruginea	(Pontoppidan, 1763)	ICZN	Calidris ferruginea (Pontopp.), 1763
ZMUA	AVSE	ZMUA_Aves	ZMUA	Occurrence	D23-2917	GR-ZMUA_Aves-D23-2917		1			Specimen unavailable	1861	D23		GR									Animalia	Chordata	Aves						ICZN
ZMUA	AVSE	ZMUA_Aves	ZMUA	PreservedSpecimen	1433-1028	GR-ZMUA_Aves-1433-1028		1			Whole animal (Stuffed)	1862	1433	Brazil	GR	Brazil	Coordinates according to: http://bl.ocks.org/rdmpage/raw/9951904/	-12.607	-54.423	2281819	Shogolev Igor	urn:lsid:catalogueoflife.org:taxon:e6ee97e4-18fd-11e5-9774-bc764e0806fb:col20150807	Procnias nudicollis	Animalia	Chordata	Aves	Passeriformes	Cotingidae	Procnias	nudicollis	(Vieillot, 1817)	ICZN	Procnias nudicollis
ZMUA	AVSE	ZMUA_Aves	ZMUA	PreservedSpecimen	1520-1115	GR-ZMUA_Aves-1520-1115		1	M	adult	Whole animal (Stuffed)	1862	1520	Brazil	GR	Brazil	Coordinates according to: http://bl.ocks.org/rdmpage/raw/9951904/	-12.607	-54.423	2281819	Shogolev Igor	urn:lsid:catalogueoflife.org:taxon:e7b819d4-18fd-11e5-9774-bc764e0806fb:col20150807	Xenops rutilans	Animalia	Chordata	Aves	Passeriformes	Furnariidae	Xenops	rutilans	Temminck, 1821	ICZN	Xenops rutilans
ZMUA	AVSE	ZMUA_Aves	ZMUA	PreservedSpecimen	2326-1921	GR-ZMUA_Aves-2326-1921		1			Whole animal (Stuffed)	1862	2326	Brazil	GR	Brazil	Coordinates according to: http://bl.ocks.org/rdmpage/raw/9951904/	-12.607	-54.423	2281819	Shogolev Igor	urn:lsid:catalogueoflife.org:taxon:e7b2887c-18fd-11e5-9774-bc764e0806fb:col20150807	Pachyramphus castaneus	Animalia	Chordata	Aves	Passeriformes	Cotingidae	Pachyramphus	castaneus	(Jardine & Selby, 1827)	ICZN	Pachyramphus castaneus
ZMUA	AVSE	ZMUA_Aves	ZMUA	PreservedSpecimen	2579-2174	GR-ZMUA_Aves-2579-2174		1			Whole animal (Stuffed)	1862	2579	Brazil	GR	Brazil	Coordinates according to: http://bl.ocks.org/rdmpage/raw/9951904/	-12.607	-54.423	2281819	Shogolev Igor	urn:lsid:catalogueoflife.org:taxon:e81c9f08-18fd-11e5-9774-bc764e0806fb:col20150623	Chamaeza nobilis	Animalia	Chordata	Aves	Passeriformes	Formicariidae	Chamaeza	nobilis	Gould, 1855	ICZN	Chamaeza nobilis
ZMUA	AVSE	ZMUA_Aves	ZMUA	PreservedSpecimen	2139-1734	GR-ZMUA_Aves-2139-1734		1			Whole animal (Stuffed)	1862	2139	Brazil	GR	Brazil	Coordinates according to: http://bl.ocks.org/rdmpage/raw/9951904/	-12.607	-54.423	2281819	Shogolev Igor	urn:lsid:catalogueoflife.org:taxon:e7d3bc68-18fd-11e5-9774-bc764e0806fb:col20150807	Tachyphonus coronatus	Animalia	Chordata	Aves	Passeriformes	Thraupidae	Tachyphonus	coronatus	(Vieillot, 1822)	ICZN	Tachyphonus coronatus
ZMUA	AVSE	ZMUA_Aves	ZMUA	PreservedSpecimen	889-484	GR-ZMUA_Aves-889-484	Borghini T.	1	F		Whole animal (Stuffed)	1862	889		GR						Shogolev Igor	urn:lsid:catalogueoflife.org:taxon:eb8b1fb0-18fd-11e5-9774-bc764e0806fb:col20150623	Circus cyaneus	Animalia	Chordata	Aves	Accipitriformes	Accipitridae	Circus	cyaneus	(Linnaeus, 1766)	ICZN	Circus cyaneus (L.)
ZMUA	AVSE	ZMUA_Aves	ZMUA	PreservedSpecimen	2454-2049	GR-ZMUA_Aves-2454-2049	E.T.T.E.	1			Whole animal (Stuffed)	1862	2454		GR	Abyssinia	Coordinates according to: http://bl.ocks.org/rdmpage/raw/9951904/	10.6657	39.783	664046	Shogolev Igor	urn:lsid:catalogueoflife.org:taxon:e7d4c304-18fd-11e5-9774-bc764e0806fb:col20150807	Quelea quelea	Animalia	Chordata	Aves	Passeriformes	Ploceidae	Quelea	quelea	(Linnaeus, 1758)	ICZN	Quelea guelea
ZMUA	AVSE	ZMUA_Aves	ZMUA	PreservedSpecimen	2736-2331	GR-ZMUA_Aves-2736-2331	Filippidis	1	M	adult	Whole animal (Stuffed)	1862	2736	Italy	GR	Italy (Lombardia)	Coordinates according to: http://bl.ocks.org/rdmpage/raw/9951904/	45.4898	9.75268	154032	Papastefanou Gabriella/ Andriopoulos Pavlos	urn:lsid:catalogueoflife.org:taxon:e7c62a7f-18fd-11e5-9774-bc764e0806fb:col20150807	Turdus philomelos	Animalia	Chordata	Aves	Passeriformes	Turdidae	Turdus	philomelos	C. L. Brehm, 1831	ICZN	Turdus philomelos
ZMUA	AVSE	ZMUA_Aves	ZMUA	PreservedSpecimen	1420-1015	GR-ZMUA_Aves-1420-1015	Guicciardi	1	F	adult	Whole animal (Stuffed)	1862	1420	Italy	GR	Italy	Coordinates according to: http://bl.ocks.org/rdmpage/raw/9951904/	42.2884	13.0518	630876	Shogolev Igor	urn:lsid:catalogueoflife.org:taxon:e8258b92-18fd-11e5-9774-bc764e0806fb:col20150807	Pyrrhula pyrrhula	Animalia	Chordata	Aves	Passeriformes	Fringillidae	Pyrrhula	pyrrhula	(Linnaeus, 1758)	ICZN	Pyrrhula pyrrhula
ZMUA	AVSE	ZMUA_Aves	ZMUA	PreservedSpecimen	1418-1013	GR-ZMUA_Aves-1418-1013	Guicciardi	1	F	adult	Whole animal (Stuffed)	1862	1418	Italy	GR	Italy	Coordinates according to: http://bl.ocks.org/rdmpage/raw/9951904/	42.2884	13.0518	630876	Shogolev Igor	urn:lsid:catalogueoflife.org:taxon:e6f2619c-18fd-11e5-9774-bc764e0806fb:col20150807	Regulus regulus	Animalia	Chordata	Aves	Passeriformes	Regulidae	Regulus	regulus	(Linnaeus, 1758)	ICZN	Regulus regulus
ZMUA	AVSE	ZMUA_Aves	ZMUA	PreservedSpecimen	2510-2105	GR-ZMUA_Aves-2510-2105	Guicciardi	1	M	adult	Whole animal (Stuffed)	1862	2510	Italy	GR	Italy	Coordinates according to: http://bl.ocks.org/rdmpage/raw/9951904/	42.2884	13.0518	630876	Shogolev Igor	urn:lsid:catalogueoflife.org:taxon:e7b26068-18fd-11e5-9774-bc764e0806fb:col20150623	Erithacus rubecula	Animalia	Chordata	Aves	Passeriformes	Muscicapidae	Erithacus	rubecula	(Linnaeus, 1758)	ICZN	Erithacus rubecula (L.)
ZMUA	AVSE	ZMUA_Aves	ZMUA	PreservedSpecimen	1919-1514	GR-ZMUA_Aves-1919-1514	Guicciardi	1	M	adult	Whole animal (Stuffed)	1862	1919	Italy	GR	Italy	Coordinates according to: http://bl.ocks.org/rdmpage/raw/9951904/	42.2884	13.0518	630876	Shogolev Igor	urn:lsid:catalogueoflife.org:taxon:e7bf4195-18fd-11e5-9774-bc764e0806fb:col20150623	Carduelis citrinella	Animalia	Chordata	Aves	Passeriformes	Fringillidae	Carduelis	citrinella	(Pallas, 1764)	ICZN	Serinus citrinella
ZMUA	AVSE	ZMUA_Aves	ZMUA	PreservedSpecimen	2020-1615	GR-ZMUA_Aves-2020-1615	Guicciardi	1	F	adult	Whole animal (Stuffed)	1862	2020	Italy	GR	Italy	Coordinates according to: http://bl.ocks.org/rdmpage/raw/9951904/	42.2884	13.0518	630876	Shogolev Igor	urn:lsid:catalogueoflife.org:taxon:e7c15b51-18fd-11e5-9774-bc764e0806fb:col20150623	Emberiza citrinella	Animalia	Chordata	Aves	Passeriformes	Emberizidae	Emberiza	citrinella	Linnaeus, 1758	ICZN	Emberiza citrinella
ZMUA	AVSE	ZMUA_Aves	ZMUA	PreservedSpecimen	2124-1719	GR-ZMUA_Aves-2124-1719	Guicciardi	1	M	adult	Whole animal (Stuffed)	1862	2124	Italy	GR	Italy	Coordinates according to: http://bl.ocks.org/rdmpage/raw/9951904/	42.2884	13.0518	630876	Shogolev Igor	urn:lsid:catalogueoflife.org:taxon:e7c15b51-18fd-11e5-9774-bc764e0806fb:col20150623	Emberiza citrinella	Animalia	Chordata	Aves	Passeriformes	Emberizidae	Emberiza	citrinella	Linnaeus, 1758	ICZN	Emberiza citrinella
ZMUA	AVSE	ZMUA_Aves	ZMUA	PreservedSpecimen	1995-1590	GR-ZMUA_Aves-1995-1590	Guicciardi	1	M	adult	Whole animal (Stuffed)	1862	1995	Italy	GR	Italy (Lombardia)	Coordinates according to: http://bl.ocks.org/rdmpage/raw/9951904/	45.4898	9.75268	154032	Shogolev Igor	urn:lsid:catalogueoflife.org:taxon:e7bbddd3-18fd-11e5-9774-bc764e0806fb:col20150623	Emberiza schoeniclus	Animalia	Chordata	Aves	Passeriformes	Emberizidae	Emberiza	schoeniclus	(Linnaeus, 1758)	ICZN	Emberiza schoeniclus (L.)
ZMUA	AVSE	ZMUA_Aves	ZMUA	PreservedSpecimen	2165-1760	GR-ZMUA_Aves-2165-1760	Guicciardi	1	M	adult	Whole animal (Stuffed)	1862	2165	Italy	GR	Italy	Coordinates according to: http://bl.ocks.org/rdmpage/raw/9951904/	42.2884	13.0518	630876	Shogolev Igor	urn:lsid:catalogueoflife.org:taxon:e81bee4f-18fd-11e5-9774-bc764e0806fb:col20150623	Carduelis cannabina	Animalia	Chordata	Aves	Passeriformes	Fringillidae	Carduelis	cannabina	(Linnaeus, 1758)	ICZN	Acanthis cannabina (L.)
ZMUA	AVSE	ZMUA_Aves	ZMUA	PreservedSpecimen	2354-1949	GR-ZMUA_Aves-2354-1949	Guicciardi	1	M	adult	Whole animal (Stuffed)	1862	2354	Italy	GR	Italy	Coordinates according to: http://bl.ocks.org/rdmpage/raw/9951904/	42.2884	13.0518	630876	Shogolev Igor	urn:lsid:catalogueoflife.org:taxon:e8258e43-18fd-11e5-9774-bc764e0806fb:col20150623	Fringilla coelebs	Animalia	Chordata	Aves	Passeriformes	Fringillidae	Fringilla	coelebs	Linnaeus, 1758	ICZN	Fringilla coelebs L.
ZMUA	AVSE	ZMUA_Aves	ZMUA	PreservedSpecimen	2028-1623	GR-ZMUA_Aves-2028-1623	Guicciardi	1	F	adult	Whole animal (Stuffed)	1862	2028	Italy	GR	Italy	Coordinates according to: http://bl.ocks.org/rdmpage/raw/9951904/	42.2884	13.0518	630876	Shogolev Igor	urn:lsid:catalogueoflife.org:taxon:e7576dfc-18fd-11e5-9774-bc764e0806fb:col20150623	Carduelis spinus	Animalia	Chordata	Aves	Passeriformes	Fringillidae	Carduelis	spinus	(Linnaeus, 1758)	ICZN	Carduelis spinus (L.)
ZMUA	AVSE	ZMUA_Aves	ZMUA	PreservedSpecimen	1763-1358	GR-ZMUA_Aves-1763-1358	Guicciardi	1	F	adult	Whole animal (Stuffed)	1862	1763	Italy	GR	Italy	Coordinates according to: http://bl.ocks.org/rdmpage/raw/9951904/	42.2884	13.0518	630876	Shogolev Igor	urn:lsid:catalogueoflife.org:taxon:e8249c30-18fd-11e5-9774-bc764e0806fb:col20150730	Motacilla alba	Animalia	Chordata	Aves	Passeriformes	Motacillidae	Motacilla	alba	Linnaeus, 1758	ICZN	Motacilla alba L.
ZMUA	AVSE	ZMUA_Aves	ZMUA	PreservedSpecimen	1760-1355	GR-ZMUA_Aves-1760-1355	Guicciardi	1	M	adult	Whole animal (Stuffed)	1862	1760	Italy	GR	Italy	Coordinates according to: http://bl.ocks.org/rdmpage/raw/9951904/	42.2884	13.0518	630876	Shogolev Igor	urn:lsid:catalogueoflife.org:taxon:e8249d9e-18fd-11e5-9774-bc764e0806fb:col20150730	Motacilla cinerea	Animalia	Chordata	Aves	Passeriformes	Motacillidae	Motacilla	cinerea	Tunstall, 1771	ICZN	Motacilla cinerea Tunst.
ZMUA	AVSE	ZMUA_Aves	ZMUA	PreservedSpecimen	1475-1070	GR-ZMUA_Aves-1475-1070	Guicciardi	1	M	adult	Whole animal (Stuffed)	1862	1475	Italy	GR	Italy	Coordinates according to: http://bl.ocks.org/rdmpage/raw/9951904/	42.2884	13.0518	630876	Shogolev Igor	urn:lsid:catalogueoflife.org:taxon:e6f2619c-18fd-11e5-9774-bc764e0806fb:col20150807	Regulus regulus	Animalia	Chordata	Aves	Passeriformes	Regulidae	Regulus	regulus	(Linnaeus, 1758)	ICZN	Regulus regulus
ZMUA	AVSE	ZMUA_Aves	ZMUA	PreservedSpecimen	2511-2106	GR-ZMUA_Aves-2511-2106	Guicciardi	1	F	adult	Whole animal (Stuffed)	1862	2511	Italy	GR	Italy	Coordinates according to: http://bl.ocks.org/rdmpage/raw/9951904/	42.2884	13.0518	630876	Shogolev Igor	urn:lsid:catalogueoflife.org:taxon:e7b26068-18fd-11e5-9774-bc764e0806fb:col20150623	Erithacus rubecula	Animalia	Chordata	Aves	Passeriformes	Muscicapidae	Erithacus	rubecula	(Linnaeus, 1758)	ICZN	Erithacus rubecula (L.)
ZMUA	AVSE	ZMUA_Aves	ZMUA	PreservedSpecimen	2513-2108	GR-ZMUA_Aves-2513-2108	Guicciardi	1	M	adult	Whole animal (Stuffed)	1862	2513	Italy	GR	Italy	Coordinates according to: http://bl.ocks.org/rdmpage/raw/9951904/	42.2884	13.0518	630876	Shogolev Igor	urn:lsid:catalogueoflife.org:taxon:e6e39aee-18fd-11e5-9774-bc764e0806fb:col20150807	Phoenicurus ochruros	Animalia	Chordata	Aves	Passeriformes	Muscicapidae	Phoenicurus	ochruros	(S. G. Gmelin, 1774)	ICZN	Phoenicurus ochruros (Gm.)
ZMUA	AVSE	ZMUA_Aves	ZMUA	PreservedSpecimen	1479-1074	GR-ZMUA_Aves-1479-1074	Guicciardi	1	M	adult	Whole animal (Stuffed)	1862	1479	Italy	GR	Italy	Coordinates according to: http://bl.ocks.org/rdmpage/raw/9951904/	42.2884	13.0518	630876	Shogolev Igor	urn:lsid:catalogueoflife.org:taxon:e7c0c67d-18fd-11e5-9774-bc764e0806fb:col20150807	Turdus torquatus	Animalia	Chordata	Aves	Passeriformes	Turdidae	Turdus	torquatus	Linnaeus, 1758	ICZN	Turdus viscivorus
ZMUA	AVSE	ZMUA_Aves	ZMUA	PreservedSpecimen	1767-1362	GR-ZMUA_Aves-1767-1362	Guicciardi	1	F		Whole animal (Stuffed)	1862	1767		GR						Shogolev Igor	urn:lsid:catalogueoflife.org:taxon:e81c6b8b-18fd-11e5-9774-bc764e0806fb:col20150623	Certhia brachydactyla	Animalia	Chordata	Aves	Passeriformes	Certhiidae	Certhia	brachydactyla	C. L. Brehm, 1820	ICZN	Certhia brachydactyla C. L. Brehm.
ZMUA	AVSE	ZMUA_Aves	ZMUA	PreservedSpecimen	1272-867	GR-ZMUA_Aves-1272-867	Guicciardi	1	M		Whole animal (Stuffed)	1862	1272		GR						Shogolev Igor	urn:lsid:catalogueoflife.org:taxon:ee220e1b-18fd-11e5-9774-bc764e0806fb:col20150623	Coturnix coturnix	Animalia	Chordata	Aves	Galliformes	Phasianidae	Coturnix	coturnix	(Linnaeus, 1758)	ICZN	Coturnix coturnix
ZMUA	AVSE	ZMUA_Aves	ZMUA	PreservedSpecimen	1812-1407	GR-ZMUA_Aves-1812-1407	Krüper Th.	1			Whole animal (Stuffed)	1862	1812	Australia	GR	Australia	Coordinates according to: http://bl.ocks.org/rdmpage/raw/9951904/	-23.5729	133.839	2114745	Shogolev Igor	urn:lsid:catalogueoflife.org:taxon:e718c9c3-18fd-11e5-9774-bc764e0806fb:col20150623	Acanthorhynchus tenuirostris	Animalia	Chordata	Aves	Passeriformes	Meliphagidae	Acanthorhynchus	tenuirostris	(Latham, 1802)	ICZN	Acanthorhynchus tenuirostris
ZMUA	AVSE	ZMUA_Aves	ZMUA	PreservedSpecimen	1839-1434	GR-ZMUA_Aves-1839-1434	Krüper Th.	1			Whole animal (Stuffed)	1862	1839		GR	Sunda Islands	Coordinates according to: http://bl.ocks.org/rdmpage/raw/9951904/	-2.89915	116.941	2472356	Shogolev Igor	urn:lsid:catalogueoflife.org:taxon:e6e4e4a7-18fd-11e5-9774-bc764e0806fb:col20150623	Arachnothera affinis	Animalia	Chordata	Aves	Passeriformes	Nectariniidae	Arachnothera	affinis	(Horsfield, 1821)	ICZN	Arachnothera affinis
ZMUA	AVSE	ZMUA_Aves	ZMUA	PreservedSpecimen	984-579	GR-ZMUA_Aves-984-579	Krüper Th.	1	M	adult	Whole animal (Stuffed)	1862	984	Brazil	GR	Brazil	Coordinates according to: http://bl.ocks.org/rdmpage/raw/9951904/	-12.607	-54.423	2281819	Shogolev Igor	urn:lsid:catalogueoflife.org:taxon:fbbb2976-18fd-11e5-9774-bc764e0806fb:col20150807	Phaps chalcoptera	Animalia	Chordata	Aves	Columbiformes	Columbidae	Phaps	chalcoptera	(Latham, 1790)	ICZN	Phaps chalcoptera Latham. 1790
ZMUA	AVSE	ZMUA_Aves	ZMUA	PreservedSpecimen	1388-983	GR-ZMUA_Aves-1388-983	Krüper Th.	1	F	adult	Whole animal (Stuffed)	1862	1388	Australia	GR	Australia	Coordinates according to: http://bl.ocks.org/rdmpage/raw/9951904/	-23.5729	133.839	2114745	Shogolev Igor	urn:lsid:catalogueoflife.org:taxon:e6eeef7a-18fd-11e5-9774-bc764e0806fb:col20150623	Falcunculus frontatus	Animalia	Chordata	Aves	Passeriformes	Pachycephalidae	Falcunculus	frontatus	(Latham, 1802)	ICZN	Falcunculus frontatus
ZMUA	AVSE	ZMUA_Aves	ZMUA	PreservedSpecimen	1197-792	GR-ZMUA_Aves-1197-792	Krüper Th.	1			Whole animal (Stuffed)	1862	1197		GR	Sunda Islands	Coordinates according to: http://bl.ocks.org/rdmpage/raw/9951904/	-2.89915	116.941	2472356	Shogolev Igor	urn:lsid:catalogueoflife.org:taxon:ededba06-18fd-11e5-9774-bc764e0806fb:col20150730	Megalaima corvina	Animalia	Chordata	Aves	Piciformes	Ramphastidae	Megalaima	corvina	(Temminck, 1831)	ICZN	Megalaima corvina Temm. 1831
ZMUA	AVSE	ZMUA_Aves	ZMUA	PreservedSpecimen	1801-1396	GR-ZMUA_Aves-1801-1396	Krüper Th.	1			Whole animal (Stuffed)	1862	1801	Australia	GR	Australia	Coordinates according to: http://bl.ocks.org/rdmpage/raw/9951904/	-23.5729	133.839	2114745	Shogolev Igor	urn:lsid:catalogueoflife.org:taxon:e7b97f80-18fd-11e5-9774-bc764e0806fb:col20150807	Xanthomyza phrygia	Animalia	Chordata	Aves	Passeriformes	Meliphagidae	Xanthomyza	phrygia	(Shaw, 1794)	ICZN	Xanthomyza phrygia
ZMUA	AVSE	ZMUA_Aves	ZMUA	PreservedSpecimen	701-296	GR-ZMUA_Aves-701-296	Krüper Th.	1			Whole animal (Stuffed)	1862	701	Iceland	GR	Iceland	Coordinates according to: http://bl.ocks.org/rdmpage/raw/9951904/	64.8232	-19.0484	282007	Shogolev Igor	urn:lsid:catalogueoflife.org:taxon:fb5f828f-18fd-11e5-9774-bc764e0806fb:col20150623	Alle alle	Animalia	Chordata	Aves	Charadriiformes	Alcidae	Alle	alle	(Linnaeus, 1758)	ICZN	Alle alle (L.)
ZMUA	AVSE	ZMUA_Aves	ZMUA	PreservedSpecimen	2508-2103	GR-ZMUA_Aves-2508-2103	Krüper Th.	1	M	adult	Whole animal (Stuffed)	1862	2508	Australia	GR	Australia	Coordinates according to: http://bl.ocks.org/rdmpage/raw/9951904/	-23.5729	133.839	2114745	Shogolev Igor	urn:lsid:catalogueoflife.org:taxon:e8203d9e-18fd-11e5-9774-bc764e0806fb:col20150730	Malurus cyaneus	Animalia	Chordata	Aves	Passeriformes	Maluridae	Malurus	cyaneus	(Ellis, 1782)	ICZN	Molurus cyaneus
ZMUA	AVSE	ZMUA_Aves	ZMUA	PreservedSpecimen	715-310	GR-ZMUA_Aves-715-310	Krüper Th.	1	M	adult	Whole animal (Stuffed)	1862	715	Iceland	GR	Iceland	Coordinates according to: http://bl.ocks.org/rdmpage/raw/9951904/	64.8232	-19.0484	282007	Shogolev Igor	urn:lsid:catalogueoflife.org:taxon:fb5f6b71-18fd-11e5-9774-bc764e0806fb:col20150623	Fratercula arctica	Animalia	Chordata	Aves	Charadriiformes	Alcidae	Fratercula	arctica	(Linnaeus, 1758)	ICZN	Fratercula arctica L. 1758
ZMUA	AVSE	ZMUA_Aves	ZMUA	PreservedSpecimen	2069-1664	GR-ZMUA_Aves-2069-1664	Krüper Th.	1			Whole animal (Stuffed)	1862	2069		GR	Sunda Islands	Coordinates according to: http://bl.ocks.org/rdmpage/raw/9951904/	-2.89915	116.941	2472356	Shogolev Igor	urn:lsid:catalogueoflife.org:taxon:e7cafd15-18fd-11e5-9774-bc764e0806fb:col20150623	Gracupica contra	Animalia	Chordata	Aves	Passeriformes	Sturnidae	Gracupica	contra	(Linnaeus, 1758)	ICZN	Sturnus contra
ZMUA	AVSE	ZMUA_Aves	ZMUA	PreservedSpecimen	738-333	GR-ZMUA_Aves-738-333	Krüper Th.	1		adult	Whole animal (Stuffed)	1862	738	South Africa	GR	S. Africa (Port Natal)	Coordinates according to: http://bl.ocks.org/rdmpage/raw/9951904/	-29.8633	31.0302	4096	Shogolev Igor	urn:lsid:catalogueoflife.org:taxon:f5a36c0d-18fd-11e5-9774-bc764e0806fb:col20150623	Amaurornis flavirostra	Animalia	Chordata	Aves	Gruiformes	Rallidae	Amaurornis	flavirostra	(Swainson, 1837)	ICZN	Amaurornis flavirostris Swainson 1837
ZMUA	AVSE	ZMUA_Aves	ZMUA	PreservedSpecimen	1380-975	GR-ZMUA_Aves-1380-975	Krüper Th.	1			Whole animal (Stuffed)	1862	1380	Indonesia	GR	Java	Coordinates according to: http://bl.ocks.org/rdmpage/raw/9951904/	-7.46988	110.004	526572	Shogolev Igor	urn:lsid:catalogueoflife.org:taxon:f18b6a02-18fd-11e5-9774-bc764e0806fb:col20150807	Rhinortha chlorophaea	Animalia	Chordata	Aves	Cuculiformes	Cuculidae	Rhinortha	chlorophaea	(Raffles, 1822)	ICZN	Phaenicophaeus chlorophaeus Raffles, 1822
ZMUA	AVSE	ZMUA_Aves	ZMUA	PreservedSpecimen	2033-1628	GR-ZMUA_Aves-2033-1628	Krüper Th.	1			Whole animal (Stuffed)	1862	2033	Australia	GR	Australia	Coordinates according to: http://bl.ocks.org/rdmpage/raw/9951904/	-23.5729	133.839	2114745	Shogolev Igor	urn:lsid:catalogueoflife.org:taxon:e7d5f3a8-18fd-11e5-9774-bc764e0806fb:col20150807	Stagonopleura guttata	Animalia	Chordata	Aves	Passeriformes	Estrildidae	Stagonopleura	guttata	(Shaw, 1796)	ICZN	Steganopleura guttatum
ZMUA	AVSE	ZMUA_Aves	ZMUA	PreservedSpecimen	2542-2137	GR-ZMUA_Aves-2542-2137	Krüper Th.	1	F	adult	Whole animal (Stuffed)	1862	2542	Australia	GR	Australia	Coordinates according to: http://bl.ocks.org/rdmpage/raw/9951904/	-23.5729	133.839	2114745	Shogolev Igor	urn:lsid:catalogueoflife.org:taxon:e7d4b88f-18fd-11e5-9774-bc764e0806fb:col20150807	Stipiturus malachurus	Animalia	Chordata	Aves	Passeriformes	Maluridae	Stipiturus	malachurus	(Shaw, 1798)	ICZN	Stripiturus malachurus
ZMUA	AVSE	ZMUA_Aves	ZMUA	PreservedSpecimen	781-376	GR-ZMUA_Aves-781-376	Krüper Th.	1			Whole animal (Stuffed)	1862	781	Australia	GR	Australia	Coordinates according to: http://bl.ocks.org/rdmpage/raw/9951904/	-23.5729	133.839	2114745	Shogolev Igor	urn:lsid:catalogueoflife.org:taxon:230923a1-18fe-11e5-9774-bc764e0806fb:col20150623	Coturnix ypsilophora australis	Animalia	Chordata	Aves	Galliformes	Phasianidae	Coturnix	ypsilophora	(Latham, 1802)	ICZN	Coturnix ypsilophora australis Bosc, 1792
ZMUA	AVSE	ZMUA_Aves	ZMUA	PreservedSpecimen	1871-1466	GR-ZMUA_Aves-1871-1466	Krüper Th.	1			Whole animal (Stuffed)	1862	1871	Brazil	GR	Brazil	Coordinates according to: http://bl.ocks.org/rdmpage/raw/9951904/	-12.607	-54.423	2281819	Shogolev Igor	urn:lsid:catalogueoflife.org:taxon:e7c80e45-18fd-11e5-9774-bc764e0806fb:col20150807	Thraupis palmarum	Animalia	Chordata	Aves	Passeriformes	Thraupidae	Thraupis	palmarum	(Wied-Neuwied, 1821)	ICZN	Thraupis palmarum
ZMUA	AVSE	ZMUA_Aves	ZMUA	PreservedSpecimen	2552-2147	GR-ZMUA_Aves-2552-2147	Krüper Th.	1			Whole animal (Stuffed)	1862	2552		GR	St. Estevan	St. Estevan could not be found. Coordinates for South America.	-20.7716	-58.4234	3930928	Shogolev Igor	urn:lsid:catalogueoflife.org:taxon:e7c6a928-18fd-11e5-9774-bc764e0806fb:col20150623	Donacobius atricapilla	Animalia	Chordata	Aves	Passeriformes	Donacobiidae	Donacobius	atricapilla	(Linnaeus, 1766)	ICZN	Donacobius atricapillus
ZMUA	AVSE	ZMUA_Aves	ZMUA	PreservedSpecimen	2392-1987	GR-ZMUA_Aves-2392-1987	Ninni A.	1	M	adult	Whole animal (Stuffed)	1862	2392		GR	Valeco monica					Papastefanou Gabriella/ Andriopoulos Pavlos	urn:lsid:catalogueoflife.org:taxon:e7b88fa6-18fd-11e5-9774-bc764e0806fb:col20150623	Corvus corax	Animalia	Chordata	Aves	Passeriformes	Corvidae	Corvus	corax	Linnaeus, 1758	ICZN	Corvus corax
ZMUA	AVSE	ZMUA_Aves	ZMUA	PreservedSpecimen	612-207	GR-ZMUA_Aves-612-207	Schrader G.	1	F	adult	Whole animal (Stuffed)	1862	612	Greece	GR	Attica	Coordinates according to: http://bl.ocks.org/rdmpage/raw/9951904/	37.9789	23.6696	50004	Shogolev Igor	urn:lsid:catalogueoflife.org:taxon:e8673d79-18fd-11e5-9774-bc764e0806fb:col20150623	Cygnus cygnus	Animalia	Chordata	Aves	Anseriformes	Anatidae	Cygnus	cygnus	(Linnaeus, 1758)	ICZN	Cygnus cygnus (L.)
ZMUA	AVSE	ZMUA_Aves	ZMUA	PreservedSpecimen	1435-1030	GR-ZMUA_Aves-1435-1030	Schrader G.	1	M	adult	Whole animal (Stuffed)	1862	1435	Greece	GR	Attica	Coordinates according to: http://bl.ocks.org/rdmpage/raw/9951904/	37.9789	23.6696	50004	Shogolev Igor	urn:lsid:catalogueoflife.org:taxon:e820c11e-18fd-11e5-9774-bc764e0806fb:col20150623	Garrulus glandarius	Animalia	Chordata	Aves	Passeriformes	Corvidae	Garrulus	glandarius	(Linnaeus, 1758)	ICZN	Garrulus glandarius
ZMUA	AVSE	ZMUA_Aves	ZMUA	PreservedSpecimen	1538-1133	GR-ZMUA_Aves-1538-1133	Schrader G.	1			Whole animal (Stuffed)	1862	1538	Brazil	GR	Brazil	Coordinates according to: http://bl.ocks.org/rdmpage/raw/9951904/	-12.607	-54.423	2281819	Shogolev Igor	urn:lsid:catalogueoflife.org:taxon:e7d3c30f-18fd-11e5-9774-bc764e0806fb:col20150807	Tachycineta albiventer	Animalia	Chordata	Aves	Passeriformes	Hirundinidae	Tachycineta	albiventer	(Boddaert, 1783)	ICZN	Tachycineta albiventer
ZMUA	AVSE	ZMUA_Aves	ZMUA	PreservedSpecimen	2725-2320	GR-ZMUA_Aves-2725-2320	Schrader G.	1	F	adult	Whole animal (Stuffed)	1862	2725	Greece	GR	Attica	Coordinates according to: http://bl.ocks.org/rdmpage/raw/9951904/	37.9789	23.6696	50004	Shogolev Igor	urn:lsid:catalogueoflife.org:taxon:ee2067f8-18fd-11e5-9774-bc764e0806fb:col20150623	Burhinus oedicnemus	Animalia	Chordata	Aves	Charadriiformes	Burhinidae	Burhinus	oedicnemus	(Linnaeus, 1758)	ICZN	Burhinus oedicnemus (L.), 1758
ZMUA	AVSE	ZMUA_Aves	ZMUA	PreservedSpecimen	948-543	GR-ZMUA_Aves-948-543	Schrader G.	1	M	juvenile	Whole animal (Stuffed)	1862	948	Greece	GR	Attica	Coordinates according to: http://bl.ocks.org/rdmpage/raw/9951904/	37.9789	23.6696	50004	Shogolev Igor	urn:lsid:catalogueoflife.org:taxon:e867f5d6-18fd-11e5-9774-bc764e0806fb:col20150807	Pelecanus onocrotalus	Animalia	Chordata	Aves	Pelecaniformes	Pelecanidae	Pelecanus	onocrotalus	Linnaeus, 1758	ICZN	Pelecanus onocrotalus (Linnaeus)
ZMUA	AVSE	ZMUA_Aves	ZMUA	PreservedSpecimen	2437-2032	GR-ZMUA_Aves-2437-2032	Schrader G.	1			Whole animal (Stuffed)	1862	2437	Brazil	GR	Brazil	Coordinates according to: http://bl.ocks.org/rdmpage/raw/9951904/	-12.607	-54.423	2281819	Shogolev Igor	urn:lsid:catalogueoflife.org:taxon:0302472c-18fe-11e5-9774-bc764e0806fb:col20150623	Calliphlox mitchellii	Animalia	Chordata	Aves	Apodiformes	Trochilidae	Calliphlox	mitchellii	(Bourcier, 1847)	ICZN	Calliphlox mitchelli Bourcier, 1847
ZMUA	AVSE	ZMUA_Aves	ZMUA	PreservedSpecimen	2277-1872	GR-ZMUA_Aves-2277-1872	Schrader G.	1			Whole animal (Stuffed)	1862	2277	Brazil	GR	Brazil	Coordinates according to: http://bl.ocks.org/rdmpage/raw/9951904/	-12.607	-54.423	2281819	Shogolev Igor	urn:lsid:catalogueoflife.org:taxon:e6e5caf1-18fd-11e5-9774-bc764e0806fb:col20150623	Cyanocompsa brissonii	Animalia	Chordata	Aves	Passeriformes	Cardinalidae	Cyanocompsa	brissonii	(Lichtenstein, 1823)	ICZN	Cyanocompsa cyanea
ZMUA	AVSE	ZMUA_Aves	ZMUA	PreservedSpecimen	2422-2017	GR-ZMUA_Aves-2422-2017	Schrader G.	1			Whole animal (Stuffed)	1862	2422	Brazil	GR	Brazil	Coordinates according to: http://bl.ocks.org/rdmpage/raw/9951904/	-12.607	-54.423	2281819	Shogolev Igor	urn:lsid:catalogueoflife.org:taxon:e7b23276-18fd-11e5-9774-bc764e0806fb:col20150807	Saltator similis	Animalia	Chordata	Aves	Passeriformes	Cardinalidae	Saltator	similis	Orbigny & Lafresnaye, 1837	ICZN	Saltator similis
ZMUA	AVSE	ZMUA_Aves	ZMUA	PreservedSpecimen	2291-1886	GR-ZMUA_Aves-2291-1886	Schrader G.	1			Whole animal (Stuffed)	1862	2291	Brazil	GR	Brazil	Coordinates according to: http://bl.ocks.org/rdmpage/raw/9951904/	-12.607	-54.423	2281819	Shogolev Igor	urn:lsid:catalogueoflife.org:taxon:e7b2828e-18fd-11e5-9774-bc764e0806fb:col20150807	Pachyramphus marginatus	Animalia	Chordata	Aves	Passeriformes	Cotingidae	Pachyramphus	marginatus	(Lichtenstein, 1823)	ICZN	Pachyramphus marginatus
ZMUA	AVSE	ZMUA_Aves	ZMUA	PreservedSpecimen	2158-1753	GR-ZMUA_Aves-2158-1753	Schrader G.	1			Whole animal (Stuffed)	1862	2158	Brazil	GR	Brazil	Coordinates according to: http://bl.ocks.org/rdmpage/raw/9951904/	-12.607	-54.423	2281819	Shogolev Igor	urn:lsid:catalogueoflife.org:taxon:e7b212c8-18fd-11e5-9774-bc764e0806fb:col20150807	Pachyramphus viridis	Animalia	Chordata	Aves	Passeriformes	Cotingidae	Pachyramphus	viridis	(Vieillot, 1816)	ICZN	Pachyramphus viridis
ZMUA	AVSE	ZMUA_Aves	ZMUA	PreservedSpecimen	2043-1638	GR-ZMUA_Aves-2043-1638	Schrader G.	1			Whole animal (Stuffed)	1862	2043	Brazil	GR	Brazil	Coordinates according to: http://bl.ocks.org/rdmpage/raw/9951904/	-12.607	-54.423	2281819	Shogolev Igor	urn:lsid:catalogueoflife.org:taxon:e6256b8c-18fd-11e5-9774-bc764e0806fb:col20150623	Bubalornis albirostris	Animalia	Chordata	Aves	Passeriformes	Ploceidae	Bubalornis	albirostris	(Vieillot, 1817)	ICZN	Bubalonis albirostris
ZMUA	AVSE	ZMUA_Aves	ZMUA	PreservedSpecimen	2384-1979	GR-ZMUA_Aves-2384-1979	Schrader G.	1			Whole animal (Stuffed)	1862	2384	Brazil	GR	Brazil	Coordinates according to: http://bl.ocks.org/rdmpage/raw/9951904/	-12.607	-54.423	2281819	Shogolev Igor	urn:lsid:catalogueoflife.org:taxon:e7b5caaf-18fd-11e5-9774-bc764e0806fb:col20150623	Drymophila ferruginea	Animalia	Chordata	Aves	Passeriformes	Thamnophilidae	Drymophila	ferruginea	(Temminck, 1822)	ICZN	Drymophila ferruginea
ZMUA	AVSE	ZMUA_Aves	ZMUA	PreservedSpecimen	2319-1914	GR-ZMUA_Aves-2319-1914	Schrader G.	1			Whole animal (Stuffed)	1862	2319	Brazil	GR	Brazil	Coordinates according to: http://bl.ocks.org/rdmpage/raw/9951904/	-12.607	-54.423	2281819	Shogolev Igor	urn:lsid:catalogueoflife.org:taxon:e6efb33b-18fd-11e5-9774-bc764e0806fb:col20150623	Dysithamnus xanthopterus	Animalia	Chordata	Aves	Passeriformes	Thamnophilidae	Dysithamnus	xanthopterus	Burmeister, 1856	ICZN	Dysithamnus xanthopterus
ZMUA	AVSE	ZMUA_Aves	ZMUA	PreservedSpecimen	2321-1916	GR-ZMUA_Aves-2321-1916	Schrader G.	1			Whole animal (Stuffed)	1862	2321	Brazil	GR	Brazil	Coordinates according to: http://bl.ocks.org/rdmpage/raw/9951904/	-12.607	-54.423	2281819	Shogolev Igor	urn:lsid:catalogueoflife.org:taxon:e6efb33b-18fd-11e5-9774-bc764e0806fb:col20150623	Dysithamnus xanthopterus	Animalia	Chordata	Aves	Passeriformes	Thamnophilidae	Dysithamnus	xanthopterus	Burmeister, 1856	ICZN	Dysithamnus xanthopterus
ZMUA	AVSE	ZMUA_Aves	ZMUA	PreservedSpecimen	2199-1794	GR-ZMUA_Aves-2199-1794	Schrader G.	1			Whole animal (Stuffed)	1862	2199	Brazil	GR	Brazil	Coordinates according to: http://bl.ocks.org/rdmpage/raw/9951904/	-12.607	-54.423	2281819	Shogolev Igor	urn:lsid:catalogueoflife.org:taxon:e7ca6b88-18fd-11e5-9774-bc764e0806fb:col20150623	Euphonia chalybea	Animalia	Chordata	Aves	Passeriformes	Thraupidae	Euphonia	chalybea	(Mikan, 1825)	ICZN	Euphonia chalybea
ZMUA	AVSE	ZMUA_Aves	ZMUA	PreservedSpecimen	2409-2004	GR-ZMUA_Aves-2409-2004	Schrader G.	1			Whole animal (Stuffed)	1862	2409	Brazil	GR	Brazil	Coordinates according to: http://bl.ocks.org/rdmpage/raw/9951904/	-12.607	-54.423	2281819	Shogolev Igor	urn:lsid:catalogueoflife.org:taxon:e7d3bb1e-18fd-11e5-9774-bc764e0806fb:col20150807	Tachyphonus cristatus	Animalia	Chordata	Aves	Passeriformes	Thraupidae	Tachyphonus	cristatus	(Linnaeus, 1766)	ICZN	Tachyphonus cristatus
ZMUA	AVSE	ZMUA_Aves	ZMUA	PreservedSpecimen	1533-1128	GR-ZMUA_Aves-1533-1128	Spielter T. W.	1			Whole animal (Stuffed)	1862	1533		GR	India	Coordinates according to: http://www.davidrumsey.com/luna/servlet/detail/RUMSEY~8~1~209897~5003705:India-?showTip=false&showTipAdvancedSearch=false&title=Search+Results%3A+List_No+equal+to+%271550.100%27&thumbnailViewUrlKey=link.view.search.url&helpUrl=http%3A%2F%2Fdoc.lunaimaging.com%2Fdisplay%2FV71D%2FLUNA%2BViewer%23LUNAViewer-LUNAViewer&fullTextSearchChecked=&advancedSearchUrl=http%3A%2F%2Fdo…	23.7268	83.8993	2005716	Shogolev Igor	urn:lsid:catalogueoflife.org:taxon:e7c15e06-18fd-11e5-9774-bc764e0806fb:col20150807	Pitta granatina	Animalia	Chordata	Aves	Passeriformes	Pittidae	Pitta	granatina	Temminck, 1830	ICZN	Pitta granatina Temm
ZMUA	AVSE	ZMUA_Aves	ZMUA	PreservedSpecimen	1480-1075	GR-ZMUA_Aves-1480-1075	Touzet N.	1			Whole animal (Stuffed)	1862	1480	Brazil	GR	Brazil	Coordinates according to: http://bl.ocks.org/rdmpage/raw/9951904/	-12.607	-54.423	2281819	Shogolev Igor	urn:lsid:catalogueoflife.org:taxon:e6f105e4-18fd-11e5-9774-bc764e0806fb:col20150730	Myiozetetes cayanensis	Animalia	Chordata	Aves	Passeriformes	Tyrannidae	Myiozetetes	cayanensis	(Linnaeus, 1766)	ICZN	Myiozetetes cayanensis
ZMUA	AVSE	ZMUA_Aves	ZMUA	PreservedSpecimen	1514-1109	GR-ZMUA_Aves-1514-1109	Touzet N.	1			Whole animal (Stuffed)	1862	1514	Brazil	GR	Brazil	Coordinates according to: http://bl.ocks.org/rdmpage/raw/9951904/	-12.607	-54.423	2281819	Shogolev Igor	urn:lsid:catalogueoflife.org:taxon:e81bd50e-18fd-11e5-9774-bc764e0806fb:col20150623	Campylorhamphus trochilirostris	Animalia	Chordata	Aves	Passeriformes	Furnariidae	Campylorhamphus	trochilirostris	(Lichtenstein, 1820)	ICZN	Campylorhamphus trochilirostris
ZMUA	AVSE	ZMUA_Aves	ZMUA	PreservedSpecimen	1974-1569	GR-ZMUA_Aves-1974-1569	Villard C. d.	1			Whole animal (Stuffed)	1862	1974	Brazil	GR	Brazil	Coordinates according to: http://bl.ocks.org/rdmpage/raw/9951904/	-12.607	-54.423	2281819	Shogolev Igor	urn:lsid:catalogueoflife.org:taxon:e6e4cb81-18fd-11e5-9774-bc764e0806fb:col20150623	Arremon taciturnus	Animalia	Chordata	Aves	Passeriformes	Emberizidae	Arremon	taciturnus	(Hermann, 1783)	ICZN	Arremon taciturnus
ZMUA	AVSE	ZMUA_Aves	ZMUA	PreservedSpecimen	932-527	GR-ZMUA_Aves-932-527	Villard C. d.	1			Whole animal (Stuffed)	1862	932	Brazil	GR	Brazil	Coordinates according to: http://bl.ocks.org/rdmpage/raw/9951904/	-12.607	-54.423	2281819	Shogolev Igor	urn:lsid:catalogueoflife.org:taxon:fbbb7b29-18fd-11e5-9774-bc764e0806fb:col20150623	Columbina talpacoti	Animalia	Chordata	Aves	Columbiformes	Columbidae	Columbina	talpacoti	(Temminck, 1810)	ICZN	Columbina talpacoti Temm. 1811
ZMUA	AVSE	ZMUA_Aves	ZMUA	PreservedSpecimen	2553-2148	GR-ZMUA_Aves-2553-2148	Villard C. d.	1			Whole animal (Stuffed)	1862	2553	Brazil	GR	Brazil	Coordinates according to: http://bl.ocks.org/rdmpage/raw/9951904/	-12.607	-54.423	2281819	Shogolev Igor	urn:lsid:catalogueoflife.org:taxon:e7c6a928-18fd-11e5-9774-bc764e0806fb:col20150623	Donacobius atricapilla	Animalia	Chordata	Aves	Passeriformes	Donacobiidae	Donacobius	atricapilla	(Linnaeus, 1766)	ICZN	Donacobius atricapillus
ZMUA	AVSE	ZMUA_Aves	ZMUA	PreservedSpecimen	1721-1316	GR-ZMUA_Aves-1721-1316	Villard C. d.	1	F	adult	Whole animal (Stuffed)	1862	1721	Brazil	GR	Brazil	Coordinates according to: http://bl.ocks.org/rdmpage/raw/9951904/	-12.607	-54.423	2281819	Shogolev Igor	urn:lsid:catalogueoflife.org:taxon:e7b0cd2d-18fd-11e5-9774-bc764e0806fb:col20150623	Euphonia violacea	Animalia	Chordata	Aves	Passeriformes	Thraupidae	Euphonia	violacea	(Linnaeus, 1758)	ICZN	Euphonia violacea
ZMUA	AVSE	ZMUA_Aves	ZMUA	PreservedSpecimen	1491-1086	GR-ZMUA_Aves-1491-1086	Villard C. d.	1			Whole animal (Stuffed)	1862	1491	Brazil	GR	Brazil	Coordinates according to: http://bl.ocks.org/rdmpage/raw/9951904/	-12.607	-54.423	2281819	Shogolev Igor	urn:lsid:catalogueoflife.org:taxon:e7c7559b-18fd-11e5-9774-bc764e0806fb:col20150730	Myiodynastes maculatus	Animalia	Chordata	Aves	Passeriformes	Tyrannidae	Myiodynastes	maculatus	(Statius Muller, 1776)	ICZN	Myiodynastes maculatus
ZMUA	AVSE	ZMUA_Aves	ZMUA	PreservedSpecimen	1250-845	GR-ZMUA_Aves-1250-845	Villard C. d.	1	M	adult	Whole animal (Stuffed)	1862	1250	Brazil	GR	Brazil	Coordinates according to: http://bl.ocks.org/rdmpage/raw/9951904/	-12.607	-54.423	2281819	Shogolev Igor	urn:lsid:catalogueoflife.org:taxon:fb32b2e4-18fd-11e5-9774-bc764e0806fb:col20150730	Melanerpes flavifrons	Animalia	Chordata	Aves	Piciformes	Picidae	Melanerpes	flavifrons	(Vieillot, 1818)	ICZN	Melanerpes flavifrons
ZMUA	AVSE	ZMUA_Aves	ZMUA	PreservedSpecimen	740-335	GR-ZMUA_Aves-740-335	Villard C. d.	1			Whole animal (Stuffed)	1862	740	Brazil	GR	Brazil	Coordinates according to: http://bl.ocks.org/rdmpage/raw/9951904/	-12.607	-54.423	2281819	Shogolev Igor	urn:lsid:catalogueoflife.org:taxon:ee1dfb6d-18fd-11e5-9774-bc764e0806fb:col20150623	Aramides saracura	Animalia	Chordata	Aves	Gruiformes	Rallidae	Aramides	saracura	(Spix, 1825)	ICZN	Aramides saracura (Spix, 1825)
ZMUA	AVSE	ZMUA_Aves	ZMUA	PreservedSpecimen	1959-1554	GR-ZMUA_Aves-1959-1554	Villard C. d.	1		adult	Whole animal (Stuffed)	1862	1959	Brazil	GR	Brazil	Coordinates according to: http://bl.ocks.org/rdmpage/raw/9951904/	-12.607	-54.423	2281819	Shogolev Igor	urn:lsid:catalogueoflife.org:taxon:e7c8139b-18fd-11e5-9774-bc764e0806fb:col20150807	Thraupis cyanoptera	Animalia	Chordata	Aves	Passeriformes	Thraupidae	Thraupis	cyanoptera	(Vieillot, 1817)	ICZN	Thraupis cyanoptera
ZMUA	AVSE	ZMUA_Aves	ZMUA	PreservedSpecimen	1870-1465	GR-ZMUA_Aves-1870-1465	Villard C. d.	1			Whole animal (Stuffed)	1862	1870	Brazil	GR	Brazil	Coordinates according to: http://bl.ocks.org/rdmpage/raw/9951904/	-12.607	-54.423	2281819	Shogolev Igor	urn:lsid:catalogueoflife.org:taxon:e7c80e45-18fd-11e5-9774-bc764e0806fb:col20150807	Thraupis palmarum	Animalia	Chordata	Aves	Passeriformes	Thraupidae	Thraupis	palmarum	(Wied-Neuwied, 1821)	ICZN	Thraupis palmarum
ZMUA	AVSE	ZMUA_Aves	ZMUA	PreservedSpecimen	1451-1046	GR-ZMUA_Aves-1451-1046	Villard C. d.	1			Whole animal (Stuffed)	1862	1451	Brazil	GR	Brazil	Coordinates according to: http://bl.ocks.org/rdmpage/raw/9951904/	-12.607	-54.423	2281819	Shogolev Igor	urn:lsid:catalogueoflife.org:taxon:e7b15532-18fd-11e5-9774-bc764e0806fb:col20150730	Myiarchus tyrannulus	Animalia	Chordata	Aves	Passeriformes	Tyrannidae	Myiarchus	tyrannulus	(Statius Muller, 1776)	ICZN	Myiarchus tyrannulus
ZMUA	AVSE	ZMUA_Aves	ZMUA	PreservedSpecimen	2309-1904	GR-ZMUA_Aves-2309-1904	Villard C. d.	1			Whole animal (Stuffed)	1862	2309	Brazil	GR	Brazil	Coordinates according to: http://bl.ocks.org/rdmpage/raw/9951904/	-12.607	-54.423	2281819	Shogolev Igor	urn:lsid:catalogueoflife.org:taxon:e81ad82a-18fd-11e5-9774-bc764e0806fb:col20150623	Conopophaga lineata	Animalia	Chordata	Aves	Passeriformes	Conopophagidae	Conopophaga	lineata	(Wied-Neuwied, 1831)	ICZN	Conopophaga lineata
ZMUA	AVSE	ZMUA_Aves	ZMUA	PreservedSpecimen	2132-1727	GR-ZMUA_Aves-2132-1727	Villard C. d.	1			Whole animal (Stuffed)	1862	2132	Brazil	GR	Brazil	Coordinates according to: http://bl.ocks.org/rdmpage/raw/9951904/	-12.607	-54.423	2281819	Shogolev Igor	urn:lsid:catalogueoflife.org:taxon:e6ef890f-18fd-11e5-9774-bc764e0806fb:col20150623	Cotinga cotinga	Animalia	Chordata	Aves	Passeriformes	Cotingidae	Cotinga	cotinga	(Linnaeus, 1766)	ICZN	Cotinga cotinga
ZMUA	AVSE	ZMUA_Aves	ZMUA	PreservedSpecimen	2266-1861	GR-ZMUA_Aves-2266-1861	Villard C. d.	1			Whole animal (Stuffed)	1862	2266	Brazil	GR	Brazil	Coordinates according to: http://bl.ocks.org/rdmpage/raw/9951904/	-12.607	-54.423	2281819	Shogolev Igor	urn:lsid:catalogueoflife.org:taxon:e7b15d34-18fd-11e5-9774-bc764e0806fb:col20150807	Zonotrichia capensis	Animalia	Chordata	Aves	Passeriformes	Emberizidae	Zonotrichia	capensis	(Statius Muller, 1776)	ICZN	Zonotrichia capensis
ZMUA	AVSE	ZMUA_Aves	ZMUA	PreservedSpecimen	2626-2221	GR-ZMUA_Aves-2626-2221	Villard C. d.	1			Whole animal (Stuffed)	1862	2626	Brazil	GR	Brazil	Coordinates according to: http://bl.ocks.org/rdmpage/raw/9951904/	-12.607	-54.423	2281819	Shogolev Igor	urn:lsid:catalogueoflife.org:taxon:e7cb9c0c-18fd-11e5-9774-bc764e0806fb:col20150807	Pipra erythrocephala	Animalia	Chordata	Aves	Passeriformes	Pipridae	Pipra	erythrocephala	(Linnaeus, 1758)	ICZN	Pipra erythrocephala
ZMUA	AVSE	ZMUA_Aves	ZMUA	PreservedSpecimen	2234-1829	GR-ZMUA_Aves-2234-1829	Villard C. d.	1			Whole animal (Stuffed)	1862	2234	Brazil	GR	Brazil	Coordinates according to: http://bl.ocks.org/rdmpage/raw/9951904/	-12.607	-54.423	2281819	Shogolev Igor	urn:lsid:catalogueoflife.org:taxon:e6efb33b-18fd-11e5-9774-bc764e0806fb:col20150623	Dysithamnus xanthopterus	Animalia	Chordata	Aves	Passeriformes	Thamnophilidae	Dysithamnus	xanthopterus	Burmeister, 1856	ICZN	Dysithamnus xanthopterus
ZMUA	AVSE	ZMUA_Aves	ZMUA	PreservedSpecimen	2621-2216	GR-ZMUA_Aves-2621-2216	Villard C. d.	1			Whole animal (Stuffed)	1862	2621	Brazil	GR	Brazil	Coordinates according to: http://bl.ocks.org/rdmpage/raw/9951904/	-12.607	-54.423	2281819	Shogolev Igor	urn:lsid:catalogueoflife.org:taxon:e8243aa8-18fd-11e5-9774-bc764e0806fb:col20150730	Mackenziaena leachii	Animalia	Chordata	Aves	Passeriformes	Thamnophilidae	Mackenziaena	leachii	(Such, 1825)	ICZN	Mackenziaena leachi
ZMUA	AVSE	ZMUA_Aves	ZMUA	PreservedSpecimen	2383-1978	GR-ZMUA_Aves-2383-1978	Villard C. d.	1			Whole animal (Stuffed)	1862	2383	Brazil	GR	Brazil	Coordinates according to: http://bl.ocks.org/rdmpage/raw/9951904/	-12.607	-54.423	2281819	Shogolev Igor	urn:lsid:catalogueoflife.org:taxon:e81e7cfa-18fd-11e5-9774-bc764e0806fb:col20150730	Myrmeciza loricata	Animalia	Chordata	Aves	Passeriformes	Thamnophilidae	Myrmeciza	loricata	(Lichtenstein, 1823)	ICZN	Myrmeciza boricata
ZMUA	AVSE	ZMUA_Aves	ZMUA	PreservedSpecimen	2279-1874	GR-ZMUA_Aves-2279-1874	Villard C. d.	1			Whole animal (Stuffed)	1862	2279	Brazil	GR	Brazil	Coordinates according to: http://bl.ocks.org/rdmpage/raw/9951904/	-12.607	-54.423	2281819	Shogolev Igor	urn:lsid:catalogueoflife.org:taxon:e81e7cfa-18fd-11e5-9774-bc764e0806fb:col20150730	Myrmeciza loricata	Animalia	Chordata	Aves	Passeriformes	Thamnophilidae	Myrmeciza	loricata	(Lichtenstein, 1823)	ICZN	Myrmeciza loricata
ZMUA	AVSE	ZMUA_Aves	ZMUA	PreservedSpecimen	2421-2016	GR-ZMUA_Aves-2421-2016	Villard C. d.	1			Whole animal (Stuffed)	1862	2421	Brazil	GR	Brazil	Coordinates according to: http://bl.ocks.org/rdmpage/raw/9951904/	-12.607	-54.423	2281819	Shogolev Igor	urn:lsid:catalogueoflife.org:taxon:e7c133e3-18fd-11e5-9774-bc764e0806fb:col20150807	Orchesticus abeillei	Animalia	Chordata	Aves	Passeriformes	Thraupidae	Orchesticus	abeillei	(Lesson, 1839)	ICZN	Orchesticus abeillei
ZMUA	AVSE	ZMUA_Aves	ZMUA	PreservedSpecimen	2228-1823	GR-ZMUA_Aves-2228-1823	Villard C. d.	1			Whole animal (Stuffed)	1862	2228	Brazil	GR	Brazil	Coordinates according to: http://bl.ocks.org/rdmpage/raw/9951904/	-12.607	-54.423	2281819	Shogolev Igor	urn:lsid:catalogueoflife.org:taxon:e7b98f88-18fd-11e5-9774-bc764e0806fb:col20150807	Orthogonys chloricterus	Animalia	Chordata	Aves	Passeriformes	Thraupidae	Orthogonys	chloricterus	(Vieillot, 1819)	ICZN	Orthogonys chloricterus
ZMUA	AVSE	ZMUA_Aves	ZMUA	PreservedSpecimen	1877-1472	GR-ZMUA_Aves-1877-1472	Villard C. d.	1			Whole animal (Stuffed)	1862	1877	Brazil	GR	Brazil	Coordinates according to: http://bl.ocks.org/rdmpage/raw/9951904/	-12.607	-54.423	2281819	Shogolev Igor	urn:lsid:catalogueoflife.org:taxon:e7ab80b2-18fd-11e5-9774-bc764e0806fb:col20150807	Schistochlamys ruficapillus	Animalia	Chordata	Aves	Passeriformes	Thraupidae	Schistochlamys	ruficapillus	(Vieillot, 1817)	ICZN	Schistochlamys ruficapillus
ZMUA	AVSE	ZMUA_Aves	ZMUA	PreservedSpecimen	2298-1893	GR-ZMUA_Aves-2298-1893	Villard C. d.	1			Whole animal (Stuffed)	1862	2298	Brazil	GR	Brazil	Coordinates according to: http://bl.ocks.org/rdmpage/raw/9951904/	-12.607	-54.423	2281819	Shogolev Igor	urn:lsid:catalogueoflife.org:taxon:e7ab80b2-18fd-11e5-9774-bc764e0806fb:col20150807	Schistochlamys ruficapillus	Animalia	Chordata	Aves	Passeriformes	Thraupidae	Schistochlamys	ruficapillus	(Vieillot, 1817)	ICZN	Schistochlamys ruficapillus
ZMUA	AVSE	ZMUA_Aves	ZMUA	PreservedSpecimen	2415-2010	GR-ZMUA_Aves-2415-2010	Villard C. d.	1			Whole animal (Stuffed)	1862	2415	Brazil	GR	Brazil	Coordinates according to: http://bl.ocks.org/rdmpage/raw/9951904/	-12.607	-54.423	2281819	Shogolev Igor	urn:lsid:catalogueoflife.org:taxon:e7ca805d-18fd-11e5-9774-bc764e0806fb:col20150807	Tangara cayana	Animalia	Chordata	Aves	Passeriformes	Thraupidae	Tangara	cayana	(Linnaeus, 1766)	ICZN	Tangara cayana
ZMUA	AVSE	ZMUA_Aves	ZMUA	PreservedSpecimen	1460-1055	GR-ZMUA_Aves-1460-1055	Villard C. d.	1			Whole animal (Stuffed)	1862	1460	Brazil	GR	Brazil	Coordinates according to: http://bl.ocks.org/rdmpage/raw/9951904/	-12.607	-54.423	2281819	Shogolev Igor	urn:lsid:catalogueoflife.org:taxon:e7c83f12-18fd-11e5-9774-bc764e0806fb:col20150807	Tersina viridis	Animalia	Chordata	Aves	Passeriformes	Thraupidae	Tersina	viridis	(Illiger, 1811)	ICZN	Tersina viridis
ZMUA	AVSE	ZMUA_Aves	ZMUA	PreservedSpecimen	2324-1919	GR-ZMUA_Aves-2324-1919	Villard C. d.	1			Whole animal (Stuffed)	1862	2324	Brazil	GR	Brazil	Coordinates according to: http://bl.ocks.org/rdmpage/raw/9951904/	-12.607	-54.423	2281819	Shogolev Igor	urn:lsid:catalogueoflife.org:taxon:e7c83f12-18fd-11e5-9774-bc764e0806fb:col20150807	Tersina viridis	Animalia	Chordata	Aves	Passeriformes	Thraupidae	Tersina	viridis	(Illiger, 1811)	ICZN	Tersina viridis
ZMUA	AVSE	ZMUA_Aves	ZMUA	PreservedSpecimen	2129-1724	GR-ZMUA_Aves-2129-1724	Villard C. d.	1			Whole animal (Stuffed)	1862	2129	Brazil	GR	Brazil	Coordinates according to: http://bl.ocks.org/rdmpage/raw/9951904/	-12.607	-54.423	2281819	Shogolev Igor	urn:lsid:catalogueoflife.org:taxon:e8345ad1-18fd-11e5-9774-bc764e0806fb:col20150807	Turdus flavipes	Animalia	Chordata	Aves	Passeriformes	Turdidae	Turdus	flavipes	Vieillot, 1818	ICZN	Platycichla flavipes
ZMUA	AVSE	ZMUA_Aves	ZMUA	PreservedSpecimen	2632-2227	GR-ZMUA_Aves-2632-2227	Villard C. d.	1			Whole animal (Stuffed)	1862	2632	Brazil	GR	Brazil	Coordinates according to: http://bl.ocks.org/rdmpage/raw/9951904/	-12.607	-54.423	2281819	Shogolev Igor	urn:lsid:catalogueoflife.org:taxon:e8345ad1-18fd-11e5-9774-bc764e0806fb:col20150807	Turdus flavipes	Animalia	Chordata	Aves	Passeriformes	Turdidae	Turdus	flavipes	Vieillot, 1818	ICZN	Platycichla flavipes
ZMUA	AVSE	ZMUA_Aves	ZMUA	PreservedSpecimen	2174-1769	GR-ZMUA_Aves-2174-1769	Villard C. d.	1			Whole animal (Stuffed)	1862	2174	Brazil	GR	Brazil	Coordinates according to: http://bl.ocks.org/rdmpage/raw/9951904/	-12.607	-54.423	2281819	Shogolev Igor	urn:lsid:catalogueoflife.org:taxon:e7b65977-18fd-11e5-9774-bc764e0806fb:col20150807	Turdus naumanni	Animalia	Chordata	Aves	Passeriformes	Turdidae	Turdus	naumanni	Temminck, 1820	ICZN	Turdus naumanni Temm.
ZMUA	AVSE	ZMUA_Aves	ZMUA	PreservedSpecimen	2153-1748	GR-ZMUA_Aves-2153-1748	Villard C. d.	1			Whole animal (Stuffed)	1862	2153	Brazil	GR	Brazil	Coordinates according to: http://bl.ocks.org/rdmpage/raw/9951904/	-12.607	-54.423	2281819	Shogolev Igor	urn:lsid:catalogueoflife.org:taxon:e81eed28-18fd-11e5-9774-bc764e0806fb:col20150730	Muscipipra vetula	Animalia	Chordata	Aves	Passeriformes	Tyrannidae	Muscipipra	vetula	(Lichtenstein, 1823)	ICZN	Muscipipra vetula
ZMUA	AVSE	ZMUA_Aves	ZMUA	PreservedSpecimen	2253-1848	GR-ZMUA_Aves-2253-1848	Villard C. d.	1			Whole animal (Stuffed)	1862	2253	Brazil	GR	Brazil	Coordinates according to: http://bl.ocks.org/rdmpage/raw/9951904/	-12.607	-54.423	2281819	Shogolev Igor	urn:lsid:catalogueoflife.org:taxon:e81eed28-18fd-11e5-9774-bc764e0806fb:col20150730	Muscipipra vetula	Animalia	Chordata	Aves	Passeriformes	Tyrannidae	Muscipipra	vetula	(Lichtenstein, 1823)	ICZN	Muscipipra vetula
ZMUA	AVSE	ZMUA_Aves	ZMUA	PreservedSpecimen	2305-1900	GR-ZMUA_Aves-2305-1900	Villard C. d.	1			Whole animal (Stuffed)	1862	2305	Brazil	GR	Brazil	Coordinates according to: http://bl.ocks.org/rdmpage/raw/9951904/	-12.607	-54.423	2281819	Shogolev Igor	urn:lsid:catalogueoflife.org:taxon:e7d463f9-18fd-11e5-9774-bc764e0806fb:col20150623	Cyclarhis gujanensis	Animalia	Chordata	Aves	Passeriformes	Vireonidae	Cyclarhis	gujanensis	(Gmelin, 1789)	ICZN	Cyclarhis gujanensis
ZMUA	AVSE	ZMUA_Aves	ZMUA	PreservedSpecimen	1610-1205	GR-ZMUA_Aves-1610-1205	E.T.T.E.; Villard C. d.	1			Whole animal (Stuffed)	1862	1610	Brazil	GR	Brazil	Coordinates according to: http://bl.ocks.org/rdmpage/raw/9951904/	-12.607	-54.423	2281819	Shogolev Igor	urn:lsid:catalogueoflife.org:taxon:e8200e2c-18fd-11e5-9774-bc764e0806fb:col20150730	Megarynchus pitangua	Animalia	Chordata	Aves	Passeriformes	Tyrannidae	Megarynchus	pitangua	(Linnaeus, 1766)	ICZN	Megarhynchus pitangua
ZMUA	AVSE	ZMUA_Aves	ZMUA	PreservedSpecimen	2125-1720	GR-ZMUA_Aves-2125-1720		1	M	adult	Whole animal (Stuffed)	1862	2125	Greece	GR	Attica	Coordinates according to: http://bl.ocks.org/rdmpage/raw/9951904/	37.9789	23.6696	50004	Papastefanou Gabriella/ Andriopoulos Pavlos	urn:lsid:catalogueoflife.org:taxon:e7b88cf3-18fd-11e5-9774-bc764e0806fb:col20150807	Pica pica	Animalia	Chordata	Aves	Passeriformes	Corvidae	Pica	pica	(Linnaeus, 1758)	ICZN	Pica pica
ZMUA	AVSE	ZMUA_Aves	ZMUA	Occurrence	D11-2904	GR-ZMUA_Aves-D11-2904		1	M	adult	Specimen unavailable	1862	D11	Brazil	GR	Brazil	Coordinates according to: http://bl.ocks.org/rdmpage/raw/9951904/	-12.607	-54.423	2281819		urn:lsid:catalogueoflife.org:taxon:eaacbd0f-ac8e-11e3-805d-020044200006:col20150401	Tangara mexicana	Animalia	Chordata	Aves	Passeriformes	Thraupidae	Tangara	mexicana	(Linnaeus, 1766)	ICZN	Calliste brasiliensis
ZMUA	AVSE	ZMUA_Aves	ZMUA	Occurrence	D29-2923	GR-ZMUA_Aves-D29-2923		1			Specimen unavailable	1862	D29	Brazil	GR	Brazil	Coordinates according to: http://bl.ocks.org/rdmpage/raw/9951904/	-12.607	-54.423	2281819				Animalia	Chordata	Aves						ICZN
ZMUA	AVSE	ZMUA_Aves	ZMUA	PreservedSpecimen	750-345	GR-ZMUA_Aves-750-345		1	M	adult	Whole animal (Stuffed)	1862	750	Greece	GR	Attica	Coordinates according to: http://bl.ocks.org/rdmpage/raw/9951904/	37.9789	23.6696	50004	Shogolev Igor	urn:lsid:catalogueoflife.org:taxon:e8664fff-18fd-11e5-9774-bc764e0806fb:col20150807	Plectropterus gambensis	Animalia	Chordata	Aves	Anseriformes	Anatidae	Plectropterus	gambensis	(Linnaeus, 1766)	ICZN	Plectropterus gambensis L., 1766
ZMUA	AVSE	ZMUA_Aves	ZMUA	PreservedSpecimen	487-82	GR-ZMUA_Aves-487-82		1	M	adult	Whole animal (Stuffed)	1862	487	Greece	GR	Attica	Coordinates according to: http://bl.ocks.org/rdmpage/raw/9951904/	37.9789	23.6696	50004	Shogolev Igor	urn:lsid:catalogueoflife.org:taxon:fbbef5e6-18fd-11e5-9774-bc764e0806fb:col20150623	Charadrius morinellus	Animalia	Chordata	Aves	Charadriiformes	Charadriidae	Charadrius	morinellus	Linnaeus, 1758	ICZN	Charadrius morinellus L., 1758
ZMUA	AVSE	ZMUA_Aves	ZMUA	PreservedSpecimen	1739-1334	GR-ZMUA_Aves-1739-1334		1			Whole animal (Stuffed)	1862	1739	Australia	GR	Australia	Coordinates according to: http://bl.ocks.org/rdmpage/raw/9951904/	-23.5729	133.839	2114745	Shogolev Igor	urn:lsid:catalogueoflife.org:taxon:e8236c49-18fd-11e5-9774-bc764e0806fb:col20150623	Lichenostomus chrysops	Animalia	Chordata	Aves	Passeriformes	Meliphagidae	Lichenostomus	chrysops	(Latham, 1802)	ICZN	Lichenostomus chrysops
ZMUA	AVSE	ZMUA_Aves	ZMUA	PreservedSpecimen	2625-2220	GR-ZMUA_Aves-2625-2220		1			Whole animal (Stuffed)	1862	2625	Brazil	GR	Brazil	Coordinates according to: http://bl.ocks.org/rdmpage/raw/9951904/	-12.607	-54.423	2281819	Shogolev Igor	urn:lsid:catalogueoflife.org:taxon:e81ad82a-18fd-11e5-9774-bc764e0806fb:col20150623	Conopophaga lineata	Animalia	Chordata	Aves	Passeriformes	Conopophagidae	Conopophaga	lineata	(Wied-Neuwied, 1831)	ICZN	Conopophaga lineata
ZMUA	AVSE	ZMUA_Aves	ZMUA	PreservedSpecimen	2181-1776	GR-ZMUA_Aves-2181-1776		1			Whole animal (Stuffed)	1862	2181	Brazil	GR	Brazil	Coordinates according to: http://bl.ocks.org/rdmpage/raw/9951904/	-12.607	-54.423	2281819	Shogolev Igor	urn:lsid:catalogueoflife.org:taxon:e7b93318-18fd-11e5-9774-bc764e0806fb:col20150807	Oryzoborus angolensis	Animalia	Chordata	Aves	Passeriformes	Emberizidae	Oryzoborus	angolensis	(Linnaeus, 1766)	ICZN	Oryzoborus angolensis
ZMUA	AVSE	ZMUA_Aves	ZMUA	PreservedSpecimen	2320-1915	GR-ZMUA_Aves-2320-1915		1			Whole animal (Stuffed)	1862	2320	Brazil	GR	Brazil	Coordinates according to: http://bl.ocks.org/rdmpage/raw/9951904/	-12.607	-54.423	2281819	Shogolev Igor	urn:lsid:catalogueoflife.org:taxon:e7b4e3f1-18fd-11e5-9774-bc764e0806fb:col20150807	Poospiza melanoleuca	Animalia	Chordata	Aves	Passeriformes	Emberizidae	Poospiza	melanoleuca	(Orbigny & Lafresnaye, 1837)	ICZN	Poospiza melanoleuca
ZMUA	AVSE	ZMUA_Aves	ZMUA	PreservedSpecimen	2297-1892	GR-ZMUA_Aves-2297-1892		1			Whole animal (Stuffed)	1862	2297	Brazil	GR	Brazil	Coordinates according to: http://bl.ocks.org/rdmpage/raw/9951904/	-12.607	-54.423	2281819	Shogolev Igor	urn:lsid:catalogueoflife.org:taxon:e7abbf2f-18fd-11e5-9774-bc764e0806fb:col20150807	Sporophila caerulescens	Animalia	Chordata	Aves	Passeriformes	Emberizidae	Sporophila	caerulescens	(Vieillot, 1823)	ICZN	Sporophila caerulescens
ZMUA	AVSE	ZMUA_Aves	ZMUA	PreservedSpecimen	2200-1795	GR-ZMUA_Aves-2200-1795		1			Whole animal (Stuffed)	1862	2200	Brazil	GR	Brazil	Coordinates according to: http://bl.ocks.org/rdmpage/raw/9951904/	-12.607	-54.423	2281819	Shogolev Igor	urn:lsid:catalogueoflife.org:taxon:e8217c3a-18fd-11e5-9774-bc764e0806fb:col20150623	Hemithraupis flavicollis	Animalia	Chordata	Aves	Passeriformes	Thraupidae	Hemithraupis	flavicollis	(Vieillot, 1818)	ICZN	Hemithraupis flavicollis
ZMUA	AVSE	ZMUA_Aves	ZMUA	PreservedSpecimen	2303-1898	GR-ZMUA_Aves-2303-1898		1			Whole animal (Stuffed)	1862	2303	Brazil	GR	Brazil	Coordinates according to: http://bl.ocks.org/rdmpage/raw/9951904/	-12.607	-54.423	2281819	Shogolev Igor	urn:lsid:catalogueoflife.org:taxon:e7b9f5ec-18fd-11e5-9774-bc764e0806fb:col20150807	Platyrinchus coronatus	Animalia	Chordata	Aves	Passeriformes	Tyrannidae	Platyrinchus	coronatus	P. L. Sclater, 1858	ICZN	Platyrinchus coronatus
ZMUA	AVSE	ZMUA_Aves	ZMUA	PreservedSpecimen	3029-2623	GR-ZMUA_Aves-3029-2623		1	F	adult	Whole animal (Stuffed)	1862	3029	Greece	GR	Attica	Coordinates according to: http://bl.ocks.org/rdmpage/raw/9951904/	37.9789	23.6696	50004	Shogolev Igor	urn:lsid:catalogueoflife.org:taxon:e867e9ec-18fd-11e5-9774-bc764e0806fb:col20150807	Phalacrocorax carbo	Animalia	Chordata	Aves	Suliformes	Phalacrocoracidae	Phalacrocorax	carbo	(Linnaeus, 1758)	ICZN	Phalacrocorax carbo Linnaeus
ZMUA	AVSE	ZMUA_Aves	ZMUA	PreservedSpecimen	2699-2294	GR-ZMUA_Aves-2699-2294		1	F	adult	Whole animal (Stuffed)	1862	2699	Greece	GR	Attica	Coordinates according to: http://bl.ocks.org/rdmpage/raw/9951904/	37.9789	23.6696	50004	Shogolev Igor	urn:lsid:catalogueoflife.org:taxon:fbbef5e6-18fd-11e5-9774-bc764e0806fb:col20150623	Charadrius morinellus	Animalia	Chordata	Aves	Charadriiformes	Charadriidae	Charadrius	morinellus	Linnaeus, 1758	ICZN	Eudromias morinellus L.
ZMUA	AVSE	ZMUA_Aves	ZMUA	PreservedSpecimen	1039-634	GR-ZMUA_Aves-1039-634		1	M	adult	Whole animal (Stuffed)	1862	1039	Greece	GR	Attica	Coordinates according to: http://bl.ocks.org/rdmpage/raw/9951904/	37.9789	23.6696	50004	Shogolev Igor	urn:lsid:catalogueoflife.org:taxon:e86656b0-18fd-11e5-9774-bc764e0806fb:col20150807	Netta rufina	Animalia	Chordata	Aves	Anseriformes	Anatidae	Netta	rufina	(Pallas, 1773)	ICZN	Netta rufina Pall.
ZMUA	AVSE	ZMUA_Aves	ZMUA	PreservedSpecimen	1193-788	GR-ZMUA_Aves-1193-788		1		juvenile	Whole animal (Stuffed)	1862	1193		GR						Shogolev Igor	urn:lsid:catalogueoflife.org:taxon:f371c776-18fd-11e5-9774-bc764e0806fb:col20150623	Aquila chrysaetos	Animalia	Chordata	Aves	Accipitriformes	Accipitridae	Aquila	chrysaetos	(Linnaeus, 1758)	ICZN	Aquila chrysaetos
ZMUA	AVSE	ZMUA_Aves	ZMUA	PreservedSpecimen	1126-721	GR-ZMUA_Aves-1126-721		1			Whole animal (Stuffed)	1862	1126		GR						Shogolev Igor	urn:lsid:catalogueoflife.org:taxon:f37c9010-ac8e-11e3-805d-020044200006:col20150401	Dendrocopos major	Animalia	Chordata	Aves	Piciformes	Picidae	Dendrocopos	major	(Linnaeus, 1758)	ICZN	Dendrocopus major
ZMUA	AVSE	ZMUA_Aves	ZMUA	PreservedSpecimen	567-162	GR-ZMUA_Aves-567-162	Borghini T.	1	M	adult	Whole animal (Stuffed)	1863	567	Greece	GR	Attica	Coordinates according to: http://bl.ocks.org/rdmpage/raw/9951904/	37.9789	23.6696	50004	Shogolev Igor	urn:lsid:catalogueoflife.org:taxon:e8593f6c-18fd-11e5-9774-bc764e0806fb:col20150807	Podiceps nigricollis	Animalia	Chordata	Aves	Podicipediformes	Podicipedidae	Podiceps	nigricollis	C. L. Brehm, 1831	ICZN	Podiceps nigricolis (Brehm.)
ZMUA	AVSE	ZMUA_Aves	ZMUA	PreservedSpecimen	1597-1192	GR-ZMUA_Aves-1597-1192	Borghini T.	1			Whole animal (Stuffed)	1863	1597		GR	Egypt	Coordinates according to: http://upload.wikimedia.org/wikipedia/commons/e/ec/Egypt_under_Muhammad_Ali_Dynasty_map_en.png	21.7953	30.2587	1188633	Shogolev Igor	urn:lsid:catalogueoflife.org:taxon:ee21037e-18fd-11e5-9774-bc764e0806fb:col20150730	Merops orientalis	Animalia	Chordata	Aves	Coraciiformes	Meropidae	Merops	orientalis	Latham, 1802	ICZN	Merops orientalis Latham, 1801
ZMUA	AVSE	ZMUA_Aves	ZMUA	PreservedSpecimen	1602-1197	GR-ZMUA_Aves-1602-1197	E.T.T.E.	1			Whole animal (Stuffed)	1863	1602		GR	Egypt	Coordinates according to: http://upload.wikimedia.org/wikipedia/commons/e/ec/Egypt_under_Muhammad_Ali_Dynasty_map_en.png	21.7953	30.2587	1188633	Shogolev Igor	urn:lsid:catalogueoflife.org:taxon:ee21037e-18fd-11e5-9774-bc764e0806fb:col20150730	Merops orientalis	Animalia	Chordata	Aves	Coraciiformes	Meropidae	Merops	orientalis	Latham, 1802	ICZN	Merops orientalis Latham, 1801
ZMUA	AVSE	ZMUA_Aves	ZMUA	PreservedSpecimen	2472-2067	GR-ZMUA_Aves-2472-2067	Guicciardi	1	M	adult	Whole animal (Stuffed)	1863	2472	Italy	GR	Italy (Lombardia)	Coordinates according to: http://bl.ocks.org/rdmpage/raw/9951904/	45.4898	9.75268	154032	Shogolev Igor	urn:lsid:catalogueoflife.org:taxon:e6ef205a-18fd-11e5-9774-bc764e0806fb:col20150807	Periparus ater	Animalia	Chordata	Aves	Passeriformes	Paridae	Periparus	ater	(Linnaeus, 1758)	ICZN	Parus ater
ZMUA	AVSE	ZMUA_Aves	ZMUA	PreservedSpecimen	2800-2395	GR-ZMUA_Aves-2800-2395	Guicciardi	1	M		Whole animal (Stuffed)	1863	2800	Italy	GR	Italy	Coordinates according to: http://bl.ocks.org/rdmpage/raw/9951904/	42.2884	13.0518	630876	Shogolev Igor	urn:lsid:catalogueoflife.org:taxon:e824a1b8-18fd-11e5-9774-bc764e0806fb:col20150623	Anthus spinoletta	Animalia	Chordata	Aves	Passeriformes	Motacillidae	Anthus	spinoletta	(Linnaeus, 1758)	ICZN	Anthus spinoletta
ZMUA	AVSE	ZMUA_Aves	ZMUA	PreservedSpecimen	2548-2143	GR-ZMUA_Aves-2548-2143	Guicciardi	1			Whole animal (Stuffed)	1863	2548	Italy	GR	Italy (Lombardia)	Coordinates according to: http://bl.ocks.org/rdmpage/raw/9951904/	45.4898	9.75268	154032	Shogolev Igor	urn:lsid:catalogueoflife.org:taxon:e81d50c3-18fd-11e5-9774-bc764e0806fb:col20150807	Troglodytes troglodytes	Animalia	Chordata	Aves	Passeriformes	Troglodytidae	Troglodytes	troglodytes	(Linnaeus, 1758)	ICZN	Troglodytes troglodytes (L.)
ZMUA	AVSE	ZMUA_Aves	ZMUA	PreservedSpecimen	1638-1233	GR-ZMUA_Aves-1638-1233	Krüper Th.	1	M	adult	Whole animal (Stuffed)	1863	1638	Turkey	GR	Izmir	Coordinates according to: http://bl.ocks.org/rdmpage/raw/9951904/	38.4274	27.1436	7784	Shogolev Igor	urn:lsid:catalogueoflife.org:taxon:e81c87db-18fd-11e5-9774-bc764e0806fb:col20150828	Cettia cetti	Animalia	Chordata	Aves	Passeriformes	Cettiidae	Cettia	cetti	(Temminck, 1820)	ICZN	Cettia cetti
ZMUA	AVSE	ZMUA_Aves	ZMUA	PreservedSpecimen	564-159	GR-ZMUA_Aves-564-159	Schlüter W.	1	F	adult	Whole animal (Stuffed)	1863	564		GR	Romania	Coordinates according to: http://upload.wikimedia.org/wikipedia/commons/e/ea/RomaniaBorderHistoryAnnimation_1859-2010.gif	45.3559	26.3031	281983	Shogolev Igor	urn:lsid:catalogueoflife.org:taxon:e8593f6c-18fd-11e5-9774-bc764e0806fb:col20150807	Podiceps nigricollis	Animalia	Chordata	Aves	Podicipediformes	Podicipedidae	Podiceps	nigricollis	C. L. Brehm, 1831	ICZN	Podiceps nigricolis (Brehm.)
ZMUA	AVSE	ZMUA_Aves	ZMUA	PreservedSpecimen	2317-1912	GR-ZMUA_Aves-2317-1912	Schrader G.	1			Whole animal (Stuffed)	1863	2317	Brazil	GR	Brazil	Coordinates according to: http://bl.ocks.org/rdmpage/raw/9951904/	-12.607	-54.423	2281819	Shogolev Igor	urn:lsid:catalogueoflife.org:taxon:e7d3f7a5-18fd-11e5-9774-bc764e0806fb:col20150807	Synallaxis albigularis	Animalia	Chordata	Aves	Passeriformes	Furnariidae	Synallaxis	albigularis	P. L. Sclater, 1858	ICZN	Synallaxis albigularis
ZMUA	AVSE	ZMUA_Aves	ZMUA	PreservedSpecimen	2131-1726	GR-ZMUA_Aves-2131-1726		1			Whole animal (Stuffed)	1863	2131	Greece	GR	Athens	Coordinates according to: http://bl.ocks.org/rdmpage/raw/9951904/	37.9833	23.7333	9880	Shogolev Igor	urn:lsid:catalogueoflife.org:taxon:e6f12345-18fd-11e5-9774-bc764e0806fb:col20150730	Melanocorypha yeltoniensis	Animalia	Chordata	Aves	Passeriformes	Alaudidae	Melanocorypha	yeltoniensis	(J. R. Forster, 1768)	ICZN	Melanocorypha yeltoniensis (J. R. Forst)
ZMUA	AVSE	ZMUA_Aves	ZMUA	PreservedSpecimen	1256-851	GR-ZMUA_Aves-1256-851		1	F	adult	Whole animal (Stuffed)	1863	1256	Greece	GR	Attica	Coordinates according to: http://bl.ocks.org/rdmpage/raw/9951904/	37.9789	23.6696	50004	Shogolev Igor	urn:lsid:catalogueoflife.org:taxon:ede1a8bc-18fd-11e5-9774-bc764e0806fb:col20150623	Ardea alba	Animalia	Chordata	Aves	Pelecaniformes	Ardeidae	Ardea	alba	Linnaeus, 1758	ICZN	Egretta alba Linnaeus
ZMUA	AVSE	ZMUA_Aves	ZMUA	PreservedSpecimen	945-540	GR-ZMUA_Aves-945-540		1	F	adult	Whole animal (Stuffed)	1863	945	Greece	GR	Attica	Coordinates according to: http://bl.ocks.org/rdmpage/raw/9951904/	37.9789	23.6696	50004	Shogolev Igor	urn:lsid:catalogueoflife.org:taxon:e867f5d6-18fd-11e5-9774-bc764e0806fb:col20150807	Pelecanus onocrotalus	Animalia	Chordata	Aves	Pelecaniformes	Pelecanidae	Pelecanus	onocrotalus	Linnaeus, 1758	ICZN	Pelecanus onocrotalus (Linnaeus)
ZMUA	AVSE	ZMUA_Aves	ZMUA	PreservedSpecimen	2591-2186	GR-ZMUA_Aves-2591-2186	Krüper Th.	1	M	adult	Whole animal (Stuffed)	1864	2591	Turkey	GR	Izmir	Coordinates according to: http://bl.ocks.org/rdmpage/raw/9951904/	38.4274	27.1436	7784	Shogolev Igor	urn:lsid:catalogueoflife.org:taxon:e7b1c2b0-18fd-11e5-9774-bc764e0806fb:col20150807	Oenanthe oenanthe	Animalia	Chordata	Aves	Passeriformes	Muscicapidae	Oenanthe	oenanthe	(Linnaeus, 1758)	ICZN	Oenanthe oenanthe (L.)
ZMUA	AVSE	ZMUA_Aves	ZMUA	PreservedSpecimen	2820-2415	GR-ZMUA_Aves-2820-2415	Philippidis	1	F	adult	Whole animal (Stuffed)	1864	2820	Greece	GR	Attica	Coordinates according to: http://bl.ocks.org/rdmpage/raw/9951904/	37.9789	23.6696	50004	Shogolev Igor	urn:lsid:catalogueoflife.org:taxon:f91ddb43-18fd-11e5-9774-bc764e0806fb:col20150807	Tetrax tetrax	Animalia	Chordata	Aves	Gruiformes	Otididae	Tetrax	tetrax	(Linnaeus, 1758)	ICZN	Tetrax tetrax
ZMUA	AVSE	ZMUA_Aves	ZMUA	PreservedSpecimen	793-388	GR-ZMUA_Aves-793-388	Schrader G.	1	F	adult	Whole animal (Stuffed)	1864	793	Greece	GR	Attica	Coordinates according to: http://bl.ocks.org/rdmpage/raw/9951904/	37.9789	23.6696	50004	Shogolev Igor	urn:lsid:catalogueoflife.org:taxon:eb8a8340-18fd-11e5-9774-bc764e0806fb:col20150623	Hieraaetus pennatus	Animalia	Chordata	Aves	Accipitriformes	Accipitridae	Hieraaetus	pennatus	(Gmelin, 1788)	ICZN	Hieraetus pennatus (Gm.), 1788
ZMUA	AVSE	ZMUA_Aves	ZMUA	PreservedSpecimen	652-247	GR-ZMUA_Aves-652-247	Schrader G.	1	M	adult	Whole animal (Stuffed)	1864	652	Greece	GR	Attica	Coordinates according to: http://bl.ocks.org/rdmpage/raw/9951904/	37.9789	23.6696	50004	Shogolev Igor	urn:lsid:catalogueoflife.org:taxon:ee2067f8-18fd-11e5-9774-bc764e0806fb:col20150623	Burhinus oedicnemus	Animalia	Chordata	Aves	Charadriiformes	Burhinidae	Burhinus	oedicnemus	(Linnaeus, 1758)	ICZN	Burhinus oedicnemus (L.), 1758
ZMUA	AVSE	ZMUA_Aves	ZMUA	PreservedSpecimen	509-104	GR-ZMUA_Aves-509-104	Schrader G.	1	M	adult	Whole animal (Stuffed)	1864	509	Greece	GR	Attica	Coordinates according to: http://bl.ocks.org/rdmpage/raw/9951904/	37.9789	23.6696	50004	Shogolev Igor	urn:lsid:catalogueoflife.org:taxon:e7cbaf8f-18fd-11e5-9774-bc764e0806fb:col20150807	Oenanthe hispanica	Animalia	Chordata	Aves	Passeriformes	Muscicapidae	Oenanthe	hispanica	(Linnaeus, 1758)	ICZN	Oenanthe hispanica
ZMUA	AVSE	ZMUA_Aves	ZMUA	PreservedSpecimen	1483-1078	GR-ZMUA_Aves-1483-1078	Soutsos A.	1			Whole animal (Stuffed)	1864	1483	Brazil	GR	Brazil	Coordinates according to: http://bl.ocks.org/rdmpage/raw/9951904/	-12.607	-54.423	2281819	Shogolev Igor	urn:lsid:catalogueoflife.org:taxon:e6f105e4-18fd-11e5-9774-bc764e0806fb:col20150730	Myiozetetes cayanensis	Animalia	Chordata	Aves	Passeriformes	Tyrannidae	Myiozetetes	cayanensis	(Linnaeus, 1766)	ICZN	Myiozetetes cayanensis
ZMUA	AVSE	ZMUA_Aves	ZMUA	PreservedSpecimen	1461-1056	GR-ZMUA_Aves-1461-1056	Soutsos A.	1			Whole animal (Stuffed)	1864	1461	Brazil	GR	Brazil	Coordinates according to: http://bl.ocks.org/rdmpage/raw/9951904/	-12.607	-54.423	2281819	Shogolev Igor	urn:lsid:catalogueoflife.org:taxon:e81cac50-18fd-11e5-9774-bc764e0806fb:col20150623	Chiroxiphia caudata	Animalia	Chordata	Aves	Passeriformes	Pipridae	Chiroxiphia	caudata	(Shaw, 1793)	ICZN	Chiroxiphia caudata
ZMUA	AVSE	ZMUA_Aves	ZMUA	PreservedSpecimen	1958-1553	GR-ZMUA_Aves-1958-1553	Soutsos A.	1			Whole animal (Stuffed)	1864	1958	Brazil	GR	Brazil	Coordinates according to: http://bl.ocks.org/rdmpage/raw/9951904/	-12.607	-54.423	2281819	Shogolev Igor	urn:lsid:catalogueoflife.org:taxon:e7d3bc68-18fd-11e5-9774-bc764e0806fb:col20150807	Tachyphonus coronatus	Animalia	Chordata	Aves	Passeriformes	Thraupidae	Tachyphonus	coronatus	(Vieillot, 1822)	ICZN	Tachyphonus coronatus
ZMUA	AVSE	ZMUA_Aves	ZMUA	PreservedSpecimen	1713-1308	GR-ZMUA_Aves-1713-1308	Soutsos A.	1			Whole animal (Stuffed)	1864	1713	Brazil	GR	Brazil	Coordinates according to: http://bl.ocks.org/rdmpage/raw/9951904/	-12.607	-54.423	2281819	Shogolev Igor	urn:lsid:catalogueoflife.org:taxon:e7ca74cb-18fd-11e5-9774-bc764e0806fb:col20150807	Tangara desmaresti	Animalia	Chordata	Aves	Passeriformes	Thraupidae	Tangara	desmaresti	(Vieillot, 1819)	ICZN	Tangara desmaresti
ZMUA	AVSE	ZMUA_Aves	ZMUA	PreservedSpecimen	1719-1314	GR-ZMUA_Aves-1719-1314	Soutsos A.	1			Whole animal (Stuffed)	1864	1719	Brazil	GR	Brazil	Coordinates according to: http://bl.ocks.org/rdmpage/raw/9951904/	-12.607	-54.423	2281819	Shogolev Igor	urn:lsid:catalogueoflife.org:taxon:e7c89a5e-18fd-11e5-9774-bc764e0806fb:col20150807	Tangara seledon	Animalia	Chordata	Aves	Passeriformes	Thraupidae	Tangara	seledon	(Statius Muller, 1776)	ICZN	Tangara seledon
ZMUA	AVSE	ZMUA_Aves	ZMUA	PreservedSpecimen	1667-1262	GR-ZMUA_Aves-1667-1262	Soutsos A.	1			Whole animal (Stuffed)	1864	1667	Brazil	GR	Brazil	Coordinates according to: http://bl.ocks.org/rdmpage/raw/9951904/	-12.607	-54.423	2281819	Shogolev Igor	urn:lsid:catalogueoflife.org:taxon:f6c360b7-18fd-11e5-9774-bc764e0806fb:col20150623	Calliphlox amethystina	Animalia	Chordata	Aves	Apodiformes	Trochilidae	Calliphlox	amethystina	(Boddaert, 1783)	ICZN	Calliphlox amethystina Bodaert 1783
ZMUA	AVSE	ZMUA_Aves	ZMUA	PreservedSpecimen	1643-1238	GR-ZMUA_Aves-1643-1238	Soutsos A.	1			Whole animal (Stuffed)	1864	1643	Brazil	GR	Brazil	Coordinates according to: http://bl.ocks.org/rdmpage/raw/9951904/	-12.607	-54.423	2281819	Shogolev Igor	urn:lsid:catalogueoflife.org:taxon:23b463fc-18fe-11e5-9774-bc764e0806fb:col20150807	Stephanoxis lalandi lalandi	Animalia	Chordata	Aves	Apodiformes	Trochilidae	Stephanoxis	lalandi	(Vieillot, 1818)	ICZN	Stephsnoxis lalandi lalandi Vieillot, 1818
ZMUA	AVSE	ZMUA_Aves	ZMUA	PreservedSpecimen	2216-1811	GR-ZMUA_Aves-2216-1811	Soutsos A.	1			Whole animal (Stuffed)	1864	2216	Brazil	GR	Brazil	Coordinates according to: http://bl.ocks.org/rdmpage/raw/9951904/	-12.607	-54.423	2281819	Shogolev Igor	urn:lsid:catalogueoflife.org:taxon:e8227656-18fd-11e5-9774-bc764e0806fb:col20150623	Ilicura militaris	Animalia	Chordata	Aves	Passeriformes	Pipridae	Ilicura	militaris	(Shaw, 1809)	ICZN	Ilicura militaris
ZMUA	AVSE	ZMUA_Aves	ZMUA	PreservedSpecimen	2385-1980	GR-ZMUA_Aves-2385-1980	Soutsos A.	1			Whole animal (Stuffed)	1864	2385	Brazil	GR	Brazil	Coordinates according to: http://bl.ocks.org/rdmpage/raw/9951904/	-12.607	-54.423	2281819	Shogolev Igor	urn:lsid:catalogueoflife.org:taxon:e8227656-18fd-11e5-9774-bc764e0806fb:col20150623	Ilicura militaris	Animalia	Chordata	Aves	Passeriformes	Pipridae	Ilicura	militaris	(Shaw, 1809)	ICZN	Ilicura militaris
ZMUA	AVSE	ZMUA_Aves	ZMUA	PreservedSpecimen	2322-1917	GR-ZMUA_Aves-2322-1917	Soutsos A.	1			Whole animal (Stuffed)	1864	2322	Brazil	GR	Brazil	Coordinates according to: http://bl.ocks.org/rdmpage/raw/9951904/	-12.607	-54.423	2281819	Shogolev Igor	urn:lsid:catalogueoflife.org:taxon:e7b96432-18fd-11e5-9774-bc764e0806fb:col20150807	Pyriglena leucoptera	Animalia	Chordata	Aves	Passeriformes	Thamnophilidae	Pyriglena	leucoptera	(Vieillot, 1818)	ICZN	Pyriglena leucoptera
ZMUA	AVSE	ZMUA_Aves	ZMUA	PreservedSpecimen	2393-1988	GR-ZMUA_Aves-2393-1988	Soutsos A.	1			Whole animal (Stuffed)	1864	2393		GR						Shogolev Igor	urn:lsid:catalogueoflife.org:taxon:f73c23c9-18fd-11e5-9774-bc764e0806fb:col20150623	Lophornis magnificus	Animalia	Chordata	Aves	Apodiformes	Trochilidae	Lophornis	magnificus	(Vieillot, 1817)	ICZN	Lophornis magnificus Vieillot, 1817
ZMUA	AVSE	ZMUA_Aves	ZMUA	PreservedSpecimen	1312-907	GR-ZMUA_Aves-1312-907	Soutsos A.	1			Whole animal (Stuffed)	1864	1312		GR						Shogolev Igor	urn:lsid:catalogueoflife.org:taxon:219c8b82-18fe-11e5-9774-bc764e0806fb:col20150623	Forpus modestus sclateri	Animalia	Chordata	Aves	Psittaciformes	Psittacidae	Forpus	modestus	(G. R. Gray, 1859)	ICZN	Forpus sclateri G. R. Gray, 1859
ZMUA	AVSE	ZMUA_Aves	ZMUA	PreservedSpecimen	2448-2043	GR-ZMUA_Aves-2448-2043	Soutsos A.	1			Whole animal (Stuffed)	1864	2448		GR						Shogolev Igor	urn:lsid:catalogueoflife.org:taxon:f70928a4-18fd-11e5-9774-bc764e0806fb:col20150623	Heliodoxa jacula	Animalia	Chordata	Aves	Apodiformes	Trochilidae	Heliodoxa	jacula	Gould, 1850	ICZN	Heliodoxa jacula Gould, 1850
ZMUA	AVSE	ZMUA_Aves	ZMUA	PreservedSpecimen	1225-820	GR-ZMUA_Aves-1225-820		1	F		Whole animal (Stuffed)	1864	1225	Greece	GR	Attica	Coordinates according to: http://bl.ocks.org/rdmpage/raw/9951904/	37.9789	23.6696	50004	Shogolev Igor	urn:lsid:catalogueoflife.org:taxon:e7b6582b-18fd-11e5-9774-bc764e0806fb:col20150807	Turdus merula	Animalia	Chordata	Aves	Passeriformes	Turdidae	Turdus	merula	Linnaeus, 1758	ICZN	Turdus merula
ZMUA	AVSE	ZMUA_Aves	ZMUA	PreservedSpecimen	484-79	GR-ZMUA_Aves-484-79		1	F		Whole animal (Stuffed)	1864	484	Greece	GR	Attica	Coordinates according to: http://bl.ocks.org/rdmpage/raw/9951904/	37.9789	23.6696	50004	Shogolev Igor	urn:lsid:catalogueoflife.org:taxon:e7b6582b-18fd-11e5-9774-bc764e0806fb:col20150807	Turdus merula	Animalia	Chordata	Aves	Passeriformes	Turdidae	Turdus	merula	Linnaeus, 1758	ICZN	Turdus merula L.
ZMUA	AVSE	ZMUA_Aves	ZMUA	PreservedSpecimen	1742-1337	GR-ZMUA_Aves-1742-1337	Nickerl	1	M	adult	Whole animal (Stuffed)	1865	1742	Australia	GR	Australia (Moreton Bay)	Coordinates according to: http://bl.ocks.org/rdmpage/raw/9951904/	-27.4022	153.045	48961	Shogolev Igor	urn:lsid:catalogueoflife.org:taxon:e7b0563d-18fd-11e5-9774-bc764e0806fb:col20150807	Pardalotus striatus	Animalia	Chordata	Aves	Passeriformes	Pardalotidae	Pardalotus	striatus	(Gmelin, 1789)	ICZN	Pardalotus striatus
ZMUA	AVSE	ZMUA_Aves	ZMUA	PreservedSpecimen	1040-635	GR-ZMUA_Aves-1040-635	Schrader G.	1	M	adult	Whole animal (Stuffed)	1865	1040	Greece	GR	Attica	Coordinates according to: http://bl.ocks.org/rdmpage/raw/9951904/	37.9789	23.6696	50004	Shogolev Igor	urn:lsid:catalogueoflife.org:taxon:e91d76d6-18fd-11e5-9774-bc764e0806fb:col20150623	Falco columbarius	Animalia	Chordata	Aves	Falconiformes	Falconidae	Falco	columbarius	Linnaeus, 1758	ICZN	Falcon columbarius
ZMUA	AVSE	ZMUA_Aves	ZMUA	PreservedSpecimen	2691-2286	GR-ZMUA_Aves-2691-2286	Schrader G.	1			Whole animal (Stuffed)	1865	2691	Greece	GR	Attica	Coordinates according to: http://bl.ocks.org/rdmpage/raw/9951904/	37.9789	23.6696	50004	Shogolev Igor	urn:lsid:catalogueoflife.org:taxon:ee195225-18fd-11e5-9774-bc764e0806fb:col20150807	Rallus aquaticus	Animalia	Chordata	Aves	Gruiformes	Rallidae	Rallus	aquaticus	Linnaeus, 1758	ICZN	Rallus aquaticus (L.), 1758
ZMUA	AVSE	ZMUA_Aves	ZMUA	PreservedSpecimen	2002-1597	GR-ZMUA_Aves-2002-1597	Tancré R.	1	M	adult	Whole animal (Stuffed)	1865	2002	Russian Federation	GR	Amur		54	128		Shogolev Igor	urn:lsid:catalogueoflife.org:taxon:e7d651a2-18fd-11e5-9774-bc764e0806fb:col20150623	Emberiza elegans	Animalia	Chordata	Aves	Passeriformes	Emberizidae	Emberiza	elegans	Temminck, 1836	ICZN	Emberiza elegans Temm.
ZMUA	AVSE	ZMUA_Aves	ZMUA	PreservedSpecimen	1662-1257	GR-ZMUA_Aves-1662-1257		1	M	adult	Whole animal (Stuffed)	1865	1662	Greece	GR	Attica	Coordinates according to: http://bl.ocks.org/rdmpage/raw/9951904/	37.9789	23.6696	50004	Shogolev Igor	urn:lsid:catalogueoflife.org:taxon:f60cbc8d-18fd-11e5-9774-bc764e0806fb:col20150623	Caprimulgus europaeus	Animalia	Chordata	Aves	Strigiformes	Caprimulgidae	Caprimulgus	europaeus	Linnaeus, 1758	ICZN	Caprimulgus europaeaus L.
ZMUA	AVSE	ZMUA_Aves	ZMUA	PreservedSpecimen	2762-2357	GR-ZMUA_Aves-2762-2357		1	F	adult	Whole animal (Stuffed)	1865	2762	Greece	GR	Attica	Coordinates according to: http://bl.ocks.org/rdmpage/raw/9951904/	37.9789	23.6696	50004	Shogolev Igor	urn:lsid:catalogueoflife.org:taxon:fb5dbb9b-18fd-11e5-9774-bc764e0806fb:col20150623	Limosa limosa	Animalia	Chordata	Aves	Charadriiformes	Scolopacidae	Limosa	limosa	(Linnaeus, 1758)	ICZN	Limosa limosa (L.), 1758
ZMUA	AVSE	ZMUA_Aves	ZMUA	PreservedSpecimen	2689-2284	GR-ZMUA_Aves-2689-2284		1	F	adult	Whole animal (Stuffed)	1865	2689	Greece	GR	Attica	Coordinates according to: http://bl.ocks.org/rdmpage/raw/9951904/	37.9789	23.6696	50004	Shogolev Igor	urn:lsid:catalogueoflife.org:taxon:ee195a60-18fd-11e5-9774-bc764e0806fb:col20150807	Porzana porzana	Animalia	Chordata	Aves	Gruiformes	Rallidae	Porzana	porzana	(Linnaeus, 1766)	ICZN	Porzana porzana L., 1766
ZMUA	AVSE	ZMUA_Aves	ZMUA	PreservedSpecimen	2695-2290	GR-ZMUA_Aves-2695-2290		1	M	adult	Whole animal (Stuffed)	1865	2695	Greece	GR	Attica	Coordinates according to: http://bl.ocks.org/rdmpage/raw/9951904/	37.9789	23.6696	50004	Shogolev Igor	urn:lsid:catalogueoflife.org:taxon:fbbf2d63-18fd-11e5-9774-bc764e0806fb:col20150807	Vanellus vanellus	Animalia	Chordata	Aves	Charadriiformes	Charadriidae	Vanellus	vanellus	(Linnaeus, 1758)	ICZN	Vanellus vanellus (L.), 1758
ZMUA	AVSE	ZMUA_Aves	ZMUA	PreservedSpecimen	2745-2340	GR-ZMUA_Aves-2745-2340	Bonkowski A.	1	F	adult	Whole animal (Stuffed)	1866	2745	Greece	GR	Attica	Coordinates according to: http://bl.ocks.org/rdmpage/raw/9951904/	37.9789	23.6696	50004	Shogolev Igor	urn:lsid:catalogueoflife.org:taxon:fbbedb60-18fd-11e5-9774-bc764e0806fb:col20150623	Actitis hypoleucos	Animalia	Chordata	Aves	Charadriiformes	Scolopacidae	Actitis	hypoleucos	(Linnaeus, 1758)	ICZN	Actitis hypoleucos (L.), 1758
ZMUA	AVSE	ZMUA_Aves	ZMUA	PreservedSpecimen	1805-1400	GR-ZMUA_Aves-1805-1400	Bonkowski A.	1	M		Whole animal (Stuffed)	1866	1805	Greece	GR	Athens	Coordinates according to: http://bl.ocks.org/rdmpage/raw/9951904/	37.9833	23.7333	9880	Shogolev Igor	urn:lsid:catalogueoflife.org:taxon:0d1977c7-18fe-11e5-9774-bc764e0806fb:col20150623	Ichthyaetus melanocephalus	Animalia	Chordata	Aves	Charadriiformes	Laridae	Ichthyaetus	melanocephalus	(Temminck, 1820)	ICZN	Larus melanocephalus
ZMUA	AVSE	ZMUA_Aves	ZMUA	PreservedSpecimen	1923-1518	GR-ZMUA_Aves-1923-1518	Bonkowski A.	1	F		Whole animal (Stuffed)	1866	1923	Greece	GR	Athens	Coordinates according to: http://bl.ocks.org/rdmpage/raw/9951904/	37.9833	23.7333	9880	Shogolev Igor	urn:lsid:catalogueoflife.org:taxon:fb5dd017-18fd-11e5-9774-bc764e0806fb:col20150623	Calidris ferruginea	Animalia	Chordata	Aves	Charadriiformes	Scolopacidae	Calidris	ferruginea	(Pontoppidan, 1763)	ICZN	Calidris ferruginea
ZMUA	AVSE	ZMUA_Aves	ZMUA	PreservedSpecimen	1594-1189	GR-ZMUA_Aves-1594-1189	Bonkowski A.	1	M	adult	Whole animal (Stuffed)	1866	1594	Greece	GR	Attica	Coordinates according to: http://bl.ocks.org/rdmpage/raw/9951904/	37.9789	23.6696	50004	Shogolev Igor	urn:lsid:catalogueoflife.org:taxon:e8553058-18fd-11e5-9774-bc764e0806fb:col20150623	Falco biarmicus	Animalia	Chordata	Aves	Falconiformes	Falconidae	Falco	biarmicus	Temminck, 1825	ICZN	Falco biarmicus
ZMUA	AVSE	ZMUA_Aves	ZMUA	PreservedSpecimen	1041-636	GR-ZMUA_Aves-1041-636	Bonkowski A.	1	M	adult	Whole animal (Stuffed)	1866	1041	Greece	GR	Attica	Coordinates according to: http://bl.ocks.org/rdmpage/raw/9951904/	37.9789	23.6696	50004	Shogolev Igor	urn:lsid:catalogueoflife.org:taxon:e85510a4-18fd-11e5-9774-bc764e0806fb:col20150623	Falco vespertinus	Animalia	Chordata	Aves	Falconiformes	Falconidae	Falco	vespertinus	Linnaeus, 1766	ICZN	Falco vespertinus (L.)
ZMUA	AVSE	ZMUA_Aves	ZMUA	PreservedSpecimen	528-123	GR-ZMUA_Aves-528-123	Bonkowski A.	1	M	adult	Whole animal (Stuffed)	1866	528	Greece	GR	Attica	Coordinates according to: http://bl.ocks.org/rdmpage/raw/9951904/	37.9789	23.6696	50004	Shogolev Igor	urn:lsid:catalogueoflife.org:taxon:e866a7a8-18fd-11e5-9774-bc764e0806fb:col20150623	Aythya fuligula	Animalia	Chordata	Aves	Anseriformes	Anatidae	Aythya	fuligula	(Linnaeus, 1758)	ICZN	Aythia fuligula (L.)
ZMUA	AVSE	ZMUA_Aves	ZMUA	PreservedSpecimen	1224-819	GR-ZMUA_Aves-1224-819	Bonkowski A.	1	M		Whole animal (Stuffed)	1866	1224	Greece	GR	Attica	Coordinates according to: http://bl.ocks.org/rdmpage/raw/9951904/	37.9789	23.6696	50004	Shogolev Igor	urn:lsid:catalogueoflife.org:taxon:ee136c63-18fd-11e5-9774-bc764e0806fb:col20150623	Jynx torquilla	Animalia	Chordata	Aves	Piciformes	Picidae	Jynx	torquilla	Linnaeus, 1758	ICZN	Jynx torquilla
ZMUA	AVSE	ZMUA_Aves	ZMUA	PreservedSpecimen	2929-2524	GR-ZMUA_Aves-2929-2524	Bonkowski A.	1	M	adult	Whole animal (Stuffed)	1866	2929	Greece	GR	Attica	Coordinates according to: http://bl.ocks.org/rdmpage/raw/9951904/	37.9789	23.6696	50004	Shogolev Igor	urn:lsid:catalogueoflife.org:taxon:e8258f9d-18fd-11e5-9774-bc764e0806fb:col20150623	Coccothraustes coccothraustes	Animalia	Chordata	Aves	Passeriformes	Fringillidae	Coccothraustes	coccothraustes	(Linnaeus, 1758)	ICZN	Coccothraustes coccothraustes (L.)
ZMUA	AVSE	ZMUA_Aves	ZMUA	PreservedSpecimen	1436-1031	GR-ZMUA_Aves-1436-1031	Bonkowski A.	1	F		Whole animal (Stuffed)	1866	1436	Greece	GR	Attica	Coordinates according to: http://bl.ocks.org/rdmpage/raw/9951904/	37.9789	23.6696	50004	Shogolev Igor	urn:lsid:catalogueoflife.org:taxon:e7bae1a5-18fd-11e5-9774-bc764e0806fb:col20150807	Oriolus oriolus	Animalia	Chordata	Aves	Passeriformes	Oriolidae	Oriolus	oriolus	(Linnaeus, 1758)	ICZN	Oriolus oriolus
ZMUA	AVSE	ZMUA_Aves	ZMUA	PreservedSpecimen	473-68	GR-ZMUA_Aves-473-68	Bonkowski A.	1	F		Whole animal (Stuffed)	1866	473	Greece	GR	Attica	Coordinates according to: http://bl.ocks.org/rdmpage/raw/9951904/	37.9789	23.6696	50004	Shogolev Igor	urn:lsid:catalogueoflife.org:taxon:e7bae1a5-18fd-11e5-9774-bc764e0806fb:col20150807	Oriolus oriolus	Animalia	Chordata	Aves	Passeriformes	Oriolidae	Oriolus	oriolus	(Linnaeus, 1758)	ICZN	Oriolus oriolus (L.)
ZMUA	AVSE	ZMUA_Aves	ZMUA	PreservedSpecimen	776-371	GR-ZMUA_Aves-776-371	Bonkowski A.	1	M	adult	Whole animal (Stuffed)	1866	776	Greece	GR	Athens	Coordinates according to: http://bl.ocks.org/rdmpage/raw/9951904/	37.9833	23.7333	9880	Shogolev Igor	urn:lsid:catalogueoflife.org:taxon:ea0468a2-18fd-11e5-9774-bc764e0806fb:col20150807	Pavo cristatus	Animalia	Chordata	Aves	Galliformes	Phasianidae	Pavo	cristatus	Linnaeus, 1758	ICZN	Pavo cristatus L., 1758
ZMUA	AVSE	ZMUA_Aves	ZMUA	PreservedSpecimen	2064-1659	GR-ZMUA_Aves-2064-1659	Jörgensen F.	1			Whole animal (Stuffed)	1866	2064	Denmark	GR	Faroe Islands	Coordinates according to: http://bl.ocks.org/rdmpage/raw/9951904/	61.8798	-6.86693	65446	Shogolev Igor	urn:lsid:catalogueoflife.org:taxon:e7b9df3d-18fd-11e5-9774-bc764e0806fb:col20150807	Sturnus vulgaris	Animalia	Chordata	Aves	Passeriformes	Sturnidae	Sturnus	vulgaris	Linnaeus, 1758	ICZN	Sturnus vulgaris L.
ZMUA	AVSE	ZMUA_Aves	ZMUA	PreservedSpecimen	1097-692	GR-ZMUA_Aves-1097-692	Philippidis	1	F	adult	Whole animal (Stuffed)	1866	1097	Greece	GR	Attica	Coordinates according to: http://bl.ocks.org/rdmpage/raw/9951904/	37.9789	23.6696	50004	Shogolev Igor	urn:lsid:catalogueoflife.org:taxon:e866a7a8-18fd-11e5-9774-bc764e0806fb:col20150623	Aythya fuligula	Animalia	Chordata	Aves	Anseriformes	Anatidae	Aythya	fuligula	(Linnaeus, 1758)	ICZN	Aythia fuligula (L.)
ZMUA	AVSE	ZMUA_Aves	ZMUA	PreservedSpecimen	515-110	GR-ZMUA_Aves-515-110	Philippidis	1	M	juvenile	Whole animal (Stuffed)	1866	515		GR						Shogolev Igor	urn:lsid:catalogueoflife.org:taxon:e7cbaf8f-18fd-11e5-9774-bc764e0806fb:col20150807	Oenanthe hispanica	Animalia	Chordata	Aves	Passeriformes	Muscicapidae	Oenanthe	hispanica	(Linnaeus, 1758)	ICZN	Oenanthe hispanica
ZMUA	AVSE	ZMUA_Aves	ZMUA	PreservedSpecimen	1085-680	GR-ZMUA_Aves-1085-680	Schrader G.	1	F	adult	Whole animal (Stuffed)	1866	1085	Greece	GR	Attica	Coordinates according to: http://bl.ocks.org/rdmpage/raw/9951904/	37.9789	23.6696	50004	Shogolev Igor	urn:lsid:catalogueoflife.org:taxon:e855136e-18fd-11e5-9774-bc764e0806fb:col20150623	Falco subbuteo	Animalia	Chordata	Aves	Falconiformes	Falconidae	Falco	subbuteo	Linnaeus, 1758	ICZN	Falco subbuteo
ZMUA	AVSE	ZMUA_Aves	ZMUA	PreservedSpecimen	1665-1260	GR-ZMUA_Aves-1665-1260	Schrader G.	1	M	adult	Whole animal (Stuffed)	1866	1665	Greece	GR	Attica	Coordinates according to: http://bl.ocks.org/rdmpage/raw/9951904/	37.9789	23.6696	50004	Shogolev Igor	urn:lsid:catalogueoflife.org:taxon:f75cc5fe-18fd-11e5-9774-bc764e0806fb:col20150623	Apus melba	Animalia	Chordata	Aves	Apodiformes	Apodidae	Apus	melba	(Linnaeus, 1758)	ICZN	Apus melba
ZMUA	AVSE	ZMUA_Aves	ZMUA	PreservedSpecimen	2711-2306	GR-ZMUA_Aves-2711-2306	Schrader G.	1			Whole animal (Stuffed)	1866	2711	Greece	GR	Attica	Coordinates according to: http://bl.ocks.org/rdmpage/raw/9951904/	37.9789	23.6696	50004	Shogolev Igor	urn:lsid:catalogueoflife.org:taxon:e8233652-18fd-11e5-9774-bc764e0806fb:col20150623	Lanius collurio	Animalia	Chordata	Aves	Passeriformes	Laniidae	Lanius	collurio	Linnaeus, 1758	ICZN	Lanius collurio L.
ZMUA	AVSE	ZMUA_Aves	ZMUA	PreservedSpecimen	728-323	GR-ZMUA_Aves-728-323	Schrader G.	1	M	juvenile	Whole animal (Stuffed)	1866	728	Greece	GR	Attica	Coordinates according to: http://bl.ocks.org/rdmpage/raw/9951904/	37.9789	23.6696	50004	Shogolev Igor	urn:lsid:catalogueoflife.org:taxon:fdd31c6a-ac8e-11e3-805d-020044200006:col20150401	Accipiter badius	Animalia	Chordata	Aves	Accipitriformes	Accipitridae	Accipiter	badius	(Gmelin, 1788)	ICZN	Accipiter badius
ZMUA	AVSE	ZMUA_Aves	ZMUA	PreservedSpecimen	2751-2346	GR-ZMUA_Aves-2751-2346	Schrader G.	1	M	adult	Whole animal (Stuffed)	1866	2751	Greece	GR	Attica	Coordinates according to: http://bl.ocks.org/rdmpage/raw/9951904/	37.9789	23.6696	50004	Shogolev Igor	urn:lsid:catalogueoflife.org:taxon:fb5dd017-18fd-11e5-9774-bc764e0806fb:col20150623	Calidris ferruginea	Animalia	Chordata	Aves	Charadriiformes	Scolopacidae	Calidris	ferruginea	(Pontoppidan, 1763)	ICZN	Calidris ferruginea (Pontopp.), 1763
ZMUA	AVSE	ZMUA_Aves	ZMUA	PreservedSpecimen	2921-2516	GR-ZMUA_Aves-2921-2516	Schrader G.	1	M	adult	Whole animal (Stuffed)	1866	2921	Greece	GR	Attica	Coordinates according to: http://bl.ocks.org/rdmpage/raw/9951904/	37.9789	23.6696	50004	Shogolev Igor	urn:lsid:catalogueoflife.org:taxon:e7b9e200-18fd-11e5-9774-bc764e0806fb:col20150807	Passer domesticus	Animalia	Chordata	Aves	Passeriformes	Passeridae	Passer	domesticus	(Linnaeus, 1758)	ICZN	Passer domesticus (L.)
ZMUA	AVSE	ZMUA_Aves	ZMUA	PreservedSpecimen	1079-674	GR-ZMUA_Aves-1079-674	Schrader G.	1	M	adult	Whole animal (Stuffed)	1866	1079	Greece	GR	Attica	Coordinates according to: http://bl.ocks.org/rdmpage/raw/9951904/	37.9789	23.6696	50004	Shogolev Igor	urn:lsid:catalogueoflife.org:taxon:e8668014-18fd-11e5-9774-bc764e0806fb:col20150730	Mergus merganser	Animalia	Chordata	Aves	Anseriformes	Anatidae	Mergus	merganser	Linnaeus, 1758	ICZN	Mergus merganser L.
ZMUA	AVSE	ZMUA_Aves	ZMUA	PreservedSpecimen	1337-932	GR-ZMUA_Aves-1337-932	Schrader G.	1	F		Whole animal (Stuffed)	1866	1337		GR						Shogolev Igor	urn:lsid:catalogueoflife.org:taxon:ee15a684-18fd-11e5-9774-bc764e0806fb:col20150623	Cuculus canorus	Animalia	Chordata	Aves	Cuculiformes	Cuculidae	Cuculus	canorus	Linnaeus, 1758	ICZN	Cuculus canorus
ZMUA	AVSE	ZMUA_Aves	ZMUA	PreservedSpecimen	2414-2009	GR-ZMUA_Aves-2414-2009	Touzet N.	1			Whole animal (Stuffed)	1866	2414	Brazil	GR	Brazil	Coordinates according to: http://bl.ocks.org/rdmpage/raw/9951904/	-12.607	-54.423	2281819	Papastefanou Gabriella			Animalia	Chordata	Aves	Passeriformes					ICZN	Passeriformes
ZMUA	AVSE	ZMUA_Aves	ZMUA	PreservedSpecimen	1955-1550	GR-ZMUA_Aves-1955-1550	Touzet N.	1	F		Whole animal (Stuffed)	1866	1955	Brazil	GR	Brazil	Coordinates according to: http://bl.ocks.org/rdmpage/raw/9951904/	-12.607	-54.423	2281819	Shogolev Igor	urn:lsid:catalogueoflife.org:taxon:e6e6246e-18fd-11e5-9774-bc764e0806fb:col20150623	Anisognathus somptuosus	Animalia	Chordata	Aves	Passeriformes	Thraupidae	Anisognathus	somptuosus	(Lesson, 1831)	ICZN	Anisognathus somptuosus
ZMUA	AVSE	ZMUA_Aves	ZMUA	PreservedSpecimen	1220-815	GR-ZMUA_Aves-1220-815	Touzet N.	1			Whole animal (Stuffed)	1866	1220	Brazil	GR	Brazil	Coordinates according to: http://bl.ocks.org/rdmpage/raw/9951904/	-12.607	-54.423	2281819	Shogolev Igor	urn:lsid:catalogueoflife.org:taxon:033af1c4-ac8f-11e3-805d-020044200006:col20150401	Galbula galbula	Animalia	Chordata	Aves	Galbuliformes	Galbulidae	Galbula	galbula	(Linnaeus, 1766)	ICZN	Galbula galbula Yieill.
ZMUA	AVSE	ZMUA_Aves	ZMUA	PreservedSpecimen	1291-886	GR-ZMUA_Aves-1291-886	Touzet N.	1			Whole animal (Stuffed)	1866	1291	Brazil	GR	Brazil	Coordinates according to: http://bl.ocks.org/rdmpage/raw/9951904/	-12.607	-54.423	2281819	Shogolev Igor	urn:lsid:catalogueoflife.org:taxon:ee1e1981-18fd-11e5-9774-bc764e0806fb:col20150623	Brotogeris tirica	Animalia	Chordata	Aves	Psittaciformes	Psittacidae	Brotogeris	tirica	(Gmelin, 1788)	ICZN	Brotogeris tirica J. F. Gmelin, 1788
ZMUA	AVSE	ZMUA_Aves	ZMUA	PreservedSpecimen	1305-900	GR-ZMUA_Aves-1305-900	Touzet N.	1			Whole animal (Stuffed)	1866	1305	Brazil	GR	Brazil	Coordinates according to: http://bl.ocks.org/rdmpage/raw/9951904/	-12.607	-54.423	2281819	Shogolev Igor	urn:lsid:catalogueoflife.org:taxon:ee1f7ec5-18fd-11e5-9774-bc764e0806fb:col20150807	Pyrrhura leucotis	Animalia	Chordata	Aves	Psittaciformes	Psittacidae	Pyrrhura	leucotis	(Kuhl, 1820)	ICZN	Pyrrhura leucotis Kuhe 1820
ZMUA	AVSE	ZMUA_Aves	ZMUA	PreservedSpecimen	1017-612	GR-ZMUA_Aves-1017-612	Touzet N.	1			Whole animal (Stuffed)	1866	1017	Brazil	GR	Brazil	Coordinates according to: http://bl.ocks.org/rdmpage/raw/9951904/	-12.607	-54.423	2281819	Shogolev Igor	urn:lsid:catalogueoflife.org:taxon:fd9e2620-18fd-11e5-9774-bc764e0806fb:col20150730	Megascops choliba	Animalia	Chordata	Aves	Strigiformes	Strigidae	Megascops	choliba	(Vieillot, 1817)	ICZN	Otus choliba Vieillot, 1817
ZMUA	AVSE	ZMUA_Aves	ZMUA	PreservedSpecimen	1308-903	GR-ZMUA_Aves-1308-903	Touzet N.	1			Whole animal (Stuffed)	1866	1308	Brazil	GR	Brazil	Coordinates according to: http://bl.ocks.org/rdmpage/raw/9951904/	-12.607	-54.423	2281819	Shogolev Igor	urn:lsid:catalogueoflife.org:taxon:fd9e2620-18fd-11e5-9774-bc764e0806fb:col20150730	Megascops choliba	Animalia	Chordata	Aves	Strigiformes	Strigidae	Megascops	choliba	(Vieillot, 1817)	ICZN	Otus choliba Vieillot, 1817
ZMUA	AVSE	ZMUA_Aves	ZMUA	PreservedSpecimen	2441-2036	GR-ZMUA_Aves-2441-2036	Touzet N.	1			Whole animal (Stuffed)	1866	2441	Brazil	GR	Brazil	Coordinates according to: http://bl.ocks.org/rdmpage/raw/9951904/	-12.607	-54.423	2281819	Shogolev Igor	urn:lsid:catalogueoflife.org:taxon:0303d014-18fe-11e5-9774-bc764e0806fb:col20150623	Discosura langsdorffi	Animalia	Chordata	Aves	Apodiformes	Trochilidae	Discosura	langsdorffi	(Temminck, 1821)	ICZN	Discosura langsdorffi Temmick, 1821
ZMUA	AVSE	ZMUA_Aves	ZMUA	PreservedSpecimen	2323-1918	GR-ZMUA_Aves-2323-1918	Touzet N.	1			Whole animal (Stuffed)	1866	2323	Brazil	GR	Brazil	Coordinates according to: http://bl.ocks.org/rdmpage/raw/9951904/	-12.607	-54.423	2281819	Shogolev Igor	urn:lsid:catalogueoflife.org:taxon:e7b2828e-18fd-11e5-9774-bc764e0806fb:col20150807	Pachyramphus marginatus	Animalia	Chordata	Aves	Passeriformes	Cotingidae	Pachyramphus	marginatus	(Lichtenstein, 1823)	ICZN	Pachyramphus marginatus
ZMUA	AVSE	ZMUA_Aves	ZMUA	PreservedSpecimen	2138-1733	GR-ZMUA_Aves-2138-1733	Touzet N.	1			Whole animal (Stuffed)	1866	2138	Brazil	GR	Brazil	Coordinates according to: http://bl.ocks.org/rdmpage/raw/9951904/	-12.607	-54.423	2281819	Shogolev Igor	urn:lsid:catalogueoflife.org:taxon:e7c6a928-18fd-11e5-9774-bc764e0806fb:col20150623	Donacobius atricapilla	Animalia	Chordata	Aves	Passeriformes	Donacobiidae	Donacobius	atricapilla	(Linnaeus, 1766)	ICZN	Donacobius atricapillus
ZMUA	AVSE	ZMUA_Aves	ZMUA	PreservedSpecimen	2347-1942	GR-ZMUA_Aves-2347-1942	Touzet N.	1			Whole animal (Stuffed)	1866	2347	Brazil	GR	Brazil	Coordinates according to: http://bl.ocks.org/rdmpage/raw/9951904/	-12.607	-54.423	2281819	Shogolev Igor	urn:lsid:catalogueoflife.org:taxon:e7c6a928-18fd-11e5-9774-bc764e0806fb:col20150623	Donacobius atricapilla	Animalia	Chordata	Aves	Passeriformes	Donacobiidae	Donacobius	atricapilla	(Linnaeus, 1766)	ICZN	Donacobius atricapillus
ZMUA	AVSE	ZMUA_Aves	ZMUA	PreservedSpecimen	2335-1930	GR-ZMUA_Aves-2335-1930	Touzet N.	1			Whole animal (Stuffed)	1866	2335	Brazil	GR	Brazil	Coordinates according to: http://bl.ocks.org/rdmpage/raw/9951904/	-12.607	-54.423	2281819	Shogolev Igor	urn:lsid:catalogueoflife.org:taxon:e6e45956-18fd-11e5-9774-bc764e0806fb:col20150623	Automolus leucophthalmus	Animalia	Chordata	Aves	Passeriformes	Furnariidae	Automolus	leucophthalmus	(Wied-Neuwied, 1821)	ICZN	Automolus leucophthalmus
ZMUA	AVSE	ZMUA_Aves	ZMUA	PreservedSpecimen	2411-2006	GR-ZMUA_Aves-2411-2006	Touzet N.	1			Whole animal (Stuffed)	1866	2411	Brazil	GR	Brazil (Bahia)	Coordinates according to: http://bl.ocks.org/rdmpage/raw/9951904/	-26.8167	-52.0333	3036	Shogolev Igor	urn:lsid:catalogueoflife.org:taxon:f8951b6d-18fd-11e5-9774-bc764e0806fb:col20150807	Myiothlypis flaveola	Animalia	Chordata	Aves	Passeriformes	Parulidae	Myiothlypis	flaveola	S. F. Baird, 1865	ICZN	Bacileuterus flaveolus
ZMUA	AVSE	ZMUA_Aves	ZMUA	PreservedSpecimen	2307-1902	GR-ZMUA_Aves-2307-1902	Touzet N.	1			Whole animal (Stuffed)	1866	2307	Brazil	GR	Brazil	Coordinates according to: http://bl.ocks.org/rdmpage/raw/9951904/	-12.607	-54.423	2281819	Shogolev Igor	urn:lsid:catalogueoflife.org:taxon:f68ff1b0-18fd-11e5-9774-bc764e0806fb:col20150807	Picumnus cirratus	Animalia	Chordata	Aves	Piciformes	Picidae	Picumnus	cirratus	Temminck, 1825	ICZN	Picumnus cirrhatus
ZMUA	AVSE	ZMUA_Aves	ZMUA	PreservedSpecimen	2310-1905	GR-ZMUA_Aves-2310-1905	Touzet N.	1			Whole animal (Stuffed)	1866	2310	Brazil	GR	Brazil	Coordinates according to: http://bl.ocks.org/rdmpage/raw/9951904/	-12.607	-54.423	2281819	Shogolev Igor	urn:lsid:catalogueoflife.org:taxon:23acb510-18fe-11e5-9774-bc764e0806fb:col20150807	Picumnus lafresnayi pusillus	Animalia	Chordata	Aves	Piciformes	Picidae	Picumnus	lafresnayi	Pinto, 1936	ICZN	Picumnus pusillus
ZMUA	AVSE	ZMUA_Aves	ZMUA	PreservedSpecimen	2256-1851	GR-ZMUA_Aves-2256-1851	Touzet N.	1			Whole animal (Stuffed)	1866	2256	Brazil	GR	Brazil	Coordinates according to: http://bl.ocks.org/rdmpage/raw/9951904/	-12.607	-54.423	2281819	Shogolev Igor	urn:lsid:catalogueoflife.org:taxon:e7cba739-18fd-11e5-9774-bc764e0806fb:col20150807	Pipra rubrocapilla	Animalia	Chordata	Aves	Passeriformes	Pipridae	Pipra	rubrocapilla	Temminck, 1821	ICZN	Pipra rubrocapilla
ZMUA	AVSE	ZMUA_Aves	ZMUA	PreservedSpecimen	1311-906	GR-ZMUA_Aves-1311-906	Touzet N.	1			Whole animal (Stuffed)	1866	1311	Brazil	GR	Brazil	Coordinates according to: http://bl.ocks.org/rdmpage/raw/9951904/	-12.607	-54.423	2281819	Shogolev Igor	urn:lsid:catalogueoflife.org:taxon:219c8b82-18fe-11e5-9774-bc764e0806fb:col20150623	Forpus modestus sclateri	Animalia	Chordata	Aves	Psittaciformes	Psittacidae	Forpus	modestus	(G. R. Gray, 1859)	ICZN	Forpus sclateri G. R. Gray, 1859
ZMUA	AVSE	ZMUA_Aves	ZMUA	PreservedSpecimen	1309-904	GR-ZMUA_Aves-1309-904	Touzet N.	1			Whole animal (Stuffed)	1866	1309	Brazil	GR	Brazil	Coordinates according to: http://bl.ocks.org/rdmpage/raw/9951904/	-12.607	-54.423	2281819	Shogolev Igor	urn:lsid:catalogueoflife.org:taxon:219c988c-18fe-11e5-9774-bc764e0806fb:col20150623	Forpus xanthopterygius crassirostris	Animalia	Chordata	Aves	Psittaciformes	Psittacidae	Forpus	xanthopterygius	(Taczanowski, 1883)	ICZN	Forpus crassirostris Taczanowski, 1883
ZMUA	AVSE	ZMUA_Aves	ZMUA	PreservedSpecimen	2047-1642	GR-ZMUA_Aves-2047-1642	Touzet N.	1			Whole animal (Stuffed)	1866	2047	Brazil	GR	Brazil	Coordinates according to: http://bl.ocks.org/rdmpage/raw/9951904/	-12.607	-54.423	2281819	Shogolev Igor	urn:lsid:catalogueoflife.org:taxon:ee1967ab-18fd-11e5-9774-bc764e0806fb:col20150807	Porzana albicollis	Animalia	Chordata	Aves	Gruiformes	Rallidae	Porzana	albicollis	(Vieillot, 1819)	ICZN	Porzana albicolis Vieilliot, 1819
ZMUA	AVSE	ZMUA_Aves	ZMUA	PreservedSpecimen	2203-1798	GR-ZMUA_Aves-2203-1798	Touzet N.	1			Whole animal (Stuffed)	1866	2203	Brazil	GR	Brazil	Coordinates according to: http://bl.ocks.org/rdmpage/raw/9951904/	-12.607	-54.423	2281819	Shogolev Igor	urn:lsid:catalogueoflife.org:taxon:e7c82812-18fd-11e5-9774-bc764e0806fb:col20150807	Thamnophilus amazonicus	Animalia	Chordata	Aves	Passeriformes	Thamnophilidae	Thamnophilus	amazonicus	P. L. Sclater, 1858	ICZN	Thamnophilus amazonicus
ZMUA	AVSE	ZMUA_Aves	ZMUA	PreservedSpecimen	2204-1799	GR-ZMUA_Aves-2204-1799	Touzet N.	1			Whole animal (Stuffed)	1866	2204	Brazil	GR	Brazil	Coordinates according to: http://bl.ocks.org/rdmpage/raw/9951904/	-12.607	-54.423	2281819	Shogolev Igor	urn:lsid:catalogueoflife.org:taxon:e7c8229a-18fd-11e5-9774-bc764e0806fb:col20150807	Thamnophilus caerulescens	Animalia	Chordata	Aves	Passeriformes	Thamnophilidae	Thamnophilus	caerulescens	Vieillot, 1816	ICZN	Thamnophilus caerulescens
ZMUA	AVSE	ZMUA_Aves	ZMUA	PreservedSpecimen	2258-1853	GR-ZMUA_Aves-2258-1853	Touzet N.	1			Whole animal (Stuffed)	1866	2258	Brazil	GR	Brazil	Coordinates according to: http://bl.ocks.org/rdmpage/raw/9951904/	-12.607	-54.423	2281819	Shogolev Igor	urn:lsid:catalogueoflife.org:taxon:e7bf53c2-18fd-11e5-9774-bc764e0806fb:col20150623	Dacnis cayana	Animalia	Chordata	Aves	Passeriformes	Thraupidae	Dacnis	cayana	(Linnaeus, 1766)	ICZN	Dacnis cayana
ZMUA	AVSE	ZMUA_Aves	ZMUA	PreservedSpecimen	2187-1782	GR-ZMUA_Aves-2187-1782	Touzet N.	1			Whole animal (Stuffed)	1866	2187	Brazil	GR	Brazil	Coordinates according to: http://bl.ocks.org/rdmpage/raw/9951904/	-12.607	-54.423	2281819	Shogolev Igor	urn:lsid:catalogueoflife.org:taxon:e7b0d3b0-18fd-11e5-9774-bc764e0806fb:col20150623	Euphonia pectoralis	Animalia	Chordata	Aves	Passeriformes	Thraupidae	Euphonia	pectoralis	(Latham, 1802)	ICZN	Euphonia pectoralis
ZMUA	AVSE	ZMUA_Aves	ZMUA	PreservedSpecimen	2219-1814	GR-ZMUA_Aves-2219-1814	Touzet N.	1			Whole animal (Stuffed)	1866	2219	Brazil	GR	Brazil	Coordinates according to: http://bl.ocks.org/rdmpage/raw/9951904/	-12.607	-54.423	2281819	Shogolev Igor	urn:lsid:catalogueoflife.org:taxon:e821598b-18fd-11e5-9774-bc764e0806fb:col20150623	Habia rubica	Animalia	Chordata	Aves	Passeriformes	Thraupidae	Habia	rubica	(Vieillot, 1817)	ICZN	Habia rubica
ZMUA	AVSE	ZMUA_Aves	ZMUA	PreservedSpecimen	2222-1817	GR-ZMUA_Aves-2222-1817	Touzet N.	1			Whole animal (Stuffed)	1866	2222	Brazil	GR	Brazil	Coordinates according to: http://bl.ocks.org/rdmpage/raw/9951904/	-12.607	-54.423	2281819	Shogolev Igor	urn:lsid:catalogueoflife.org:taxon:e8217c3a-18fd-11e5-9774-bc764e0806fb:col20150623	Hemithraupis flavicollis	Animalia	Chordata	Aves	Passeriformes	Thraupidae	Hemithraupis	flavicollis	(Vieillot, 1818)	ICZN	Hemithraupis flavicollis
ZMUA	AVSE	ZMUA_Aves	ZMUA	PreservedSpecimen	2293-1888	GR-ZMUA_Aves-2293-1888	Touzet N.	1			Whole animal (Stuffed)	1866	2293	Brazil	GR	Brazil	Coordinates according to: http://bl.ocks.org/rdmpage/raw/9951904/	-12.607	-54.423	2281819	Shogolev Igor	urn:lsid:catalogueoflife.org:taxon:e8217c3a-18fd-11e5-9774-bc764e0806fb:col20150623	Hemithraupis flavicollis	Animalia	Chordata	Aves	Passeriformes	Thraupidae	Hemithraupis	flavicollis	(Vieillot, 1818)	ICZN	Hemithraupis flavicollis
ZMUA	AVSE	ZMUA_Aves	ZMUA	PreservedSpecimen	1463-1058	GR-ZMUA_Aves-1463-1058	Touzet N.	1			Whole animal (Stuffed)	1866	1463	Brazil	GR	Brazil	Coordinates according to: http://bl.ocks.org/rdmpage/raw/9951904/	-12.607	-54.423	2281819	Shogolev Igor	urn:lsid:catalogueoflife.org:taxon:e7d5de33-18fd-11e5-9774-bc764e0806fb:col20150807	Stephanophorus diadematus	Animalia	Chordata	Aves	Passeriformes	Thraupidae	Stephanophorus	diadematus	(Temminck, 1823)	ICZN	Stephanophorus diadematus
ZMUA	AVSE	ZMUA_Aves	ZMUA	PreservedSpecimen	1673-1268	GR-ZMUA_Aves-1673-1268	Touzet N.	1			Whole animal (Stuffed)	1866	1673	Brazil	GR	Brazil	Coordinates according to: http://bl.ocks.org/rdmpage/raw/9951904/	-12.607	-54.423	2281819	Shogolev Igor	urn:lsid:catalogueoflife.org:taxon:f7096db5-18fd-11e5-9774-bc764e0806fb:col20150623	Heliodoxa gularis	Animalia	Chordata	Aves	Apodiformes	Trochilidae	Heliodoxa	gularis	(Gould, 1860)	ICZN	Heliodoxa gularis
ZMUA	AVSE	ZMUA_Aves	ZMUA	PreservedSpecimen	2435-2030	GR-ZMUA_Aves-2435-2030	Touzet N.	1			Whole animal (Stuffed)	1866	2435	Brazil	GR	Brazil	Coordinates according to: http://bl.ocks.org/rdmpage/raw/9951904/	-12.607	-54.423	2281819	Shogolev Igor	urn:lsid:catalogueoflife.org:taxon:f74d9f9b-18fd-11e5-9774-bc764e0806fb:col20150807	Ramphodon naevius	Animalia	Chordata	Aves	Apodiformes	Trochilidae	Ramphodon	naevius	(Dumont, 1818)	ICZN	Ramphodon naevius Dumont, 1818
ZMUA	AVSE	ZMUA_Aves	ZMUA	PreservedSpecimen	2436-2031	GR-ZMUA_Aves-2436-2031	Touzet N.	1			Whole animal (Stuffed)	1866	2436	Brazil	GR	Brazil	Coordinates according to: http://bl.ocks.org/rdmpage/raw/9951904/	-12.607	-54.423	2281819	Shogolev Igor	urn:lsid:catalogueoflife.org:taxon:f74d9f9b-18fd-11e5-9774-bc764e0806fb:col20150807	Ramphodon naevius	Animalia	Chordata	Aves	Apodiformes	Trochilidae	Ramphodon	naevius	(Dumont, 1818)	ICZN	Ramphodon naevius Dumont, 1818
ZMUA	AVSE	ZMUA_Aves	ZMUA	PreservedSpecimen	2173-1768	GR-ZMUA_Aves-2173-1768	Touzet N.	1			Whole animal (Stuffed)	1866	2173	Brazil	GR	Brazil	Coordinates according to: http://bl.ocks.org/rdmpage/raw/9951904/	-12.607	-54.423	2281819	Shogolev Igor	urn:lsid:catalogueoflife.org:taxon:e7b63e26-18fd-11e5-9774-bc764e0806fb:col20150807	Turdus migratorius	Animalia	Chordata	Aves	Passeriformes	Turdidae	Turdus	migratorius	Linnaeus, 1766	ICZN	Turdus migratorius
ZMUA	AVSE	ZMUA_Aves	ZMUA	PreservedSpecimen	2232-1827	GR-ZMUA_Aves-2232-1827	Touzet N.	1			Whole animal (Stuffed)	1866	2232	Brazil	GR	Brazil	Coordinates according to: http://bl.ocks.org/rdmpage/raw/9951904/	-12.607	-54.423	2281819	Shogolev Igor	urn:lsid:catalogueoflife.org:taxon:e6e45ffb-18fd-11e5-9774-bc764e0806fb:col20150623	Attila rufus	Animalia	Chordata	Aves	Passeriformes	Tyrannidae	Attila	rufus	(Vieillot, 1819)	ICZN	Attila rufus
ZMUA	AVSE	ZMUA_Aves	ZMUA	PreservedSpecimen	2316-1911	GR-ZMUA_Aves-2316-1911	Touzet N.	1			Whole animal (Stuffed)	1866	2316	Brazil	GR	Brazil	Coordinates according to: http://bl.ocks.org/rdmpage/raw/9951904/	-12.607	-54.423	2281819	Shogolev Igor	urn:lsid:catalogueoflife.org:taxon:28a2f9a4-18fe-11e5-9774-bc764e0806fb:col20150807	Vireo olivaceus chivi	Animalia	Chordata	Aves	Passeriformes	Vireonidae	Vireo	olivaceus	(Vieillot, 1817)	ICZN	Vireo chivi
ZMUA	AVSE	ZMUA_Aves	ZMUA	PreservedSpecimen	2333-1928	GR-ZMUA_Aves-2333-1928	Touzet N.	1			Whole animal (Stuffed)	1866	2333	Brazil	GR	Brazil	Coordinates according to: http://bl.ocks.org/rdmpage/raw/9951904/	-12.607	-54.423	2281819	Shogolev Igor	urn:lsid:catalogueoflife.org:taxon:28a2f9a4-18fe-11e5-9774-bc764e0806fb:col20150807	Vireo olivaceus chivi	Animalia	Chordata	Aves	Passeriformes	Vireonidae	Vireo	olivaceus	(Vieillot, 1817)	ICZN	Vireo chivi
ZMUA	AVSE	ZMUA_Aves	ZMUA	PreservedSpecimen	2237-1832	GR-ZMUA_Aves-2237-1832	Touzet N.	1			Whole animal (Stuffed)	1866	2237	Brazil	GR	Brazil	Coordinates according to: http://bl.ocks.org/rdmpage/raw/9951904/	-12.607	-54.423	2281819	Shogolev Igor	urn:lsid:catalogueoflife.org:taxon:e6e45ffb-18fd-11e5-9774-bc764e0806fb:col20150623	Attila rufus	Animalia	Chordata	Aves	Passeriformes	Tyrannidae	Attila	rufus	(Vieillot, 1819)	ICZN	Attila rufus
ZMUA	AVSE	ZMUA_Aves	ZMUA	PreservedSpecimen	2314-1909	GR-ZMUA_Aves-2314-1909	Touzet N.	1			Whole animal (Stuffed)	1866	2314	Brazil	GR	Brazil	Coordinates according to: http://bl.ocks.org/rdmpage/raw/9951904/	-12.607	-54.423	2281819	Shogolev Igor	urn:lsid:catalogueoflife.org:taxon:e6f3476b-18fd-11e5-9774-bc764e0806fb:col20150807	Philydor rufum	Animalia	Chordata	Aves	Passeriformes	Furnariidae	Philydor	rufum	(Vieillot, 1818)	ICZN	Philydor rufus
ZMUA	AVSE	ZMUA_Aves	ZMUA	PreservedSpecimen	2391-1986	GR-ZMUA_Aves-2391-1986	Touzet N.	1			Whole animal (Stuffed)	1866	2391	Brazil	GR	Brazil	Coordinates according to: http://bl.ocks.org/rdmpage/raw/9951904/	-12.607	-54.423	2281819	Shogolev Igor	urn:lsid:catalogueoflife.org:taxon:0304762d-18fe-11e5-9774-bc764e0806fb:col20150623	Florisuga fusca	Animalia	Chordata	Aves	Apodiformes	Trochilidae	Florisuga	fusca	(Vieillot, 1817)	ICZN	Florisuga fusca Vieillot 1817
ZMUA	AVSE	ZMUA_Aves	ZMUA	PreservedSpecimen	2120-1715	GR-ZMUA_Aves-2120-1715	Touzet N.	1		adult	Whole animal (Stuffed)	1866	2120	Brazil	GR	Brazil	Coordinates according to: http://bl.ocks.org/rdmpage/raw/9951904/	-12.607	-54.423	2281819	Shogolev Igor	urn:lsid:catalogueoflife.org:taxon:e821c639-18fd-11e5-9774-bc764e0806fb:col20150623	Hirundinea ferruginea	Animalia	Chordata	Aves	Passeriformes	Tyrannidae	Hirundinea	ferruginea	(Gmelin, 1788)	ICZN	Hirundinea ferruginea
ZMUA	AVSE	ZMUA_Aves	ZMUA	PreservedSpecimen	1289-884	GR-ZMUA_Aves-1289-884	Villard C. d.	1		adult	Whole animal (Stuffed)	1866	1289	Brazil	GR	Brazil	Coordinates according to: http://bl.ocks.org/rdmpage/raw/9951904/	-12.607	-54.423	2281819	Shogolev Igor	urn:lsid:catalogueoflife.org:taxon:ee20c39d-18fd-11e5-9774-bc764e0806fb:col20150807	Pyrrhura frontalis	Animalia	Chordata	Aves	Psittaciformes	Psittacidae	Pyrrhura	frontalis	(Vieillot, 1818)	ICZN	Pyrrhura frontalis Vieillot, 1818
ZMUA	AVSE	ZMUA_Aves	ZMUA	Occurrence	D5-2943	GR-ZMUA_Aves-D5-2943		1			Specimen unavailable	1866	D5	Brazil	GR	Brazil	Coordinates according to: http://bl.ocks.org/rdmpage/raw/9951904/	-12.607	-54.423	2281819		urn:lsid:catalogueoflife.org:taxon:4b3c492e-6ae5-11e5-9d43-bc764e092680:col20151110	Pyrrhura picta	Animalia	Chordata	Aves	Psittaciformes	Psittacidae	Pyrrhura	picta	(Statius Muller, 1776)	ICZN	Psittacus (Conurus) versicolor
ZMUA	AVSE	ZMUA_Aves	ZMUA	Occurrence	D6-2944	GR-ZMUA_Aves-D6-2944		1			Specimen unavailable	1866	D6	Brazil	GR	Brazil	Coordinates according to: http://bl.ocks.org/rdmpage/raw/9951904/	-12.607	-54.423	2281819		urn:lsid:catalogueoflife.org:taxon:583ebf61-6ae5-11e5-9d43-bc764e092680:col20151110	Psilopsiagon aurifrons	Animalia	Chordata	Aves	Psittaciformes	Psittacidae	Psilopsiagon	aurifrons	(Lesson, 1830)	ICZN	Psittacus aurifrons
ZMUA	AVSE	ZMUA_Aves	ZMUA	Occurrence	D10-2903	GR-ZMUA_Aves-D10-2903		1			Specimen unavailable	1866	D10	Brazil	GR	Brazil	Coordinates according to: http://bl.ocks.org/rdmpage/raw/9951904/	-12.607	-54.423	2281819			Trochilus sp.	Animalia	Chordata	Aves	Apodiformes	Trochilidae	Trochilus			ICZN	Trochilus pralandu
ZMUA	AVSE	ZMUA_Aves	ZMUA	PreservedSpecimen	506-101	GR-ZMUA_Aves-506-101		1	M	adult	Whole animal (Stuffed)	1866	506	Greece	GR	Attica	Coordinates according to: http://bl.ocks.org/rdmpage/raw/9951904/	37.9789	23.6696	50004	Shogolev Igor	urn:lsid:catalogueoflife.org:taxon:e7cbaf8f-18fd-11e5-9774-bc764e0806fb:col20150807	Oenanthe hispanica	Animalia	Chordata	Aves	Passeriformes	Muscicapidae	Oenanthe	hispanica	(Linnaeus, 1758)	ICZN	Oenanthe hispanica
ZMUA	AVSE	ZMUA_Aves	ZMUA	PreservedSpecimen	651-246	GR-ZMUA_Aves-651-246		1			Whole animal (Stuffed)	1866	651	Greece	GR	Attica	Coordinates according to: http://bl.ocks.org/rdmpage/raw/9951904/	37.9789	23.6696	50004	Shogolev Igor	urn:lsid:catalogueoflife.org:taxon:ee2067f8-18fd-11e5-9774-bc764e0806fb:col20150623	Burhinus oedicnemus	Animalia	Chordata	Aves	Charadriiformes	Burhinidae	Burhinus	oedicnemus	(Linnaeus, 1758)	ICZN	Burhinus oedicnemus (L.), 1758
ZMUA	AVSE	ZMUA_Aves	ZMUA	PreservedSpecimen	677-272	GR-ZMUA_Aves-677-272		1			Whole animal (Stuffed)	1866	677	Greece	GR	Attica	Coordinates according to: http://bl.ocks.org/rdmpage/raw/9951904/	37.9789	23.6696	50004	Shogolev Igor	urn:lsid:catalogueoflife.org:taxon:fbbedb60-18fd-11e5-9774-bc764e0806fb:col20150623	Actitis hypoleucos	Animalia	Chordata	Aves	Charadriiformes	Scolopacidae	Actitis	hypoleucos	(Linnaeus, 1758)	ICZN	Actitis hypoleucos (L.), 1758
ZMUA	AVSE	ZMUA_Aves	ZMUA	Occurrence	D22-2916	GR-ZMUA_Aves-D22-2916		1			Specimen unavailable	1867	D22	Brazil	GR	Brazil	Coordinates according to: http://bl.ocks.org/rdmpage/raw/9951904/	-12.607	-54.423	2281819				Animalia	Chordata	Aves						ICZN
ZMUA	AVSE	ZMUA_Aves	ZMUA	Occurrence	D24-2918	GR-ZMUA_Aves-D24-2918		1			Specimen unavailable	1867	D24	Brazil	GR	Brazil	Coordinates according to: http://bl.ocks.org/rdmpage/raw/9951904/	-12.607	-54.423	2281819				Animalia	Chordata	Aves						ICZN
ZMUA	AVSE	ZMUA_Aves	ZMUA	Occurrence	B5-2881	GR-ZMUA_Aves-B5-2881		1			Specimen unavailable	1867	B5	Italy	GR	Italy	Coordinates according to: http://bl.ocks.org/rdmpage/raw/9951904/	42.2884	13.0518	630876		urn:lsid:catalogueoflife.org:taxon:fdd31c6a-ac8e-11e3-805d-020044200006:col20150401	Accipiter badius	Animalia	Chordata	Aves	Accipitriformes	Accipitridae	Accipiter	badius	(Gmelin, 1788)	ICZN	Astur badius
ZMUA	AVSE	ZMUA_Aves	ZMUA	Occurrence	D3-2924	GR-ZMUA_Aves-D3-2924		1			Specimen unavailable	1867	D3		GR	India	Coordinates according to: http://www.davidrumsey.com/luna/servlet/detail/RUMSEY~8~1~209897~5003705:India-?showTip=false&showTipAdvancedSearch=false&title=Search+Results%3A+List_No+equal+to+%271550.100%27&thumbnailViewUrlKey=link.view.search.url&helpUrl=http%3A%2F%2Fdoc.lunaimaging.com%2Fdisplay%2FV71D%2FLUNA%2BViewer%23LUNAViewer-LUNAViewer&fullTextSearchChecked=&advancedSearchUrl=http%3A%2F%2Fdo…	23.7268	83.8993	2005716				Animalia	Chordata	Aves						ICZN
ZMUA	AVSE	ZMUA_Aves	ZMUA	Occurrence	D14-2907	GR-ZMUA_Aves-D14-2907		1			Specimen unavailable	1867	D14		GR								Alauda sp.	Animalia	Chordata	Aves	Passeriformes	Alaudidae	Alauda			ICZN	Alauda (Certhilauda)
ZMUA	AVSE	ZMUA_Aves	ZMUA	PreservedSpecimen	644-239	GR-ZMUA_Aves-644-239		1			Whole animal (Stuffed)	1867	644	Greece	GR	Attica	Coordinates according to: http://bl.ocks.org/rdmpage/raw/9951904/	37.9789	23.6696	50004	Shogolev Igor	urn:lsid:catalogueoflife.org:taxon:ed95e28e-18fd-11e5-9774-bc764e0806fb:col20150623	Glareola pratincola	Animalia	Chordata	Aves	Charadriiformes	Glareolidae	Glareola	pratincola	(Linnaeus, 1766)	ICZN	Glareola pratincola
ZMUA	AVSE	ZMUA_Aves	ZMUA	PreservedSpecimen	2516-2111	GR-ZMUA_Aves-2516-2111	Krüper Th.	1	M	adult	Whole animal (Stuffed)	1867	2516	Australia	GR	Australia	Coordinates according to: http://bl.ocks.org/rdmpage/raw/9951904/	-23.5729	133.839	2114745	Shogolev Igor	urn:lsid:catalogueoflife.org:taxon:e7cd15c8-18fd-11e5-9774-bc764e0806fb:col20150623	Epthianura albifrons	Animalia	Chordata	Aves	Passeriformes	Meliphagidae	Epthianura	albifrons	(Jardine & Selby, 1828)	ICZN	Ephthianura albifrons
ZMUA	AVSE	ZMUA_Aves	ZMUA	PreservedSpecimen	2538-2133	GR-ZMUA_Aves-2538-2133	Krüper Th.	1	M	adult	Whole animal (Stuffed)	1867	2538	Italy	GR	Italy	Coordinates according to: http://bl.ocks.org/rdmpage/raw/9951904/	42.2884	13.0518	630876	Shogolev Igor	urn:lsid:catalogueoflife.org:taxon:e716bdae-18fd-11e5-9774-bc764e0806fb:col20150623	Acrocephalus paludicola	Animalia	Chordata	Aves	Passeriformes	Acrocephalidae	Acrocephalus	paludicola	(Vieillot, 1817)	ICZN	Acrocephalus palludicola (Vieill.)
ZMUA	AVSE	ZMUA_Aves	ZMUA	PreservedSpecimen	1456-1051	GR-ZMUA_Aves-1456-1051	Leonard; Touzet N.	1			Whole animal (Stuffed)	1867	1456	Brazil	GR	Brazil	Coordinates according to: http://bl.ocks.org/rdmpage/raw/9951904/	-12.607	-54.423	2281819	Shogolev Igor	urn:lsid:catalogueoflife.org:taxon:e8202e78-18fd-11e5-9774-bc764e0806fb:col20150730	Manacus manacus	Animalia	Chordata	Aves	Passeriformes	Pipridae	Manacus	manacus	(Linnaeus, 1766)	ICZN	Manacus manacus
ZMUA	AVSE	ZMUA_Aves	ZMUA	PreservedSpecimen	713-308	GR-ZMUA_Aves-713-308	Ninni A.	1	M	adult	Whole animal (Stuffed)	1867	713	Italy	GR	Italy	Coordinates according to: http://bl.ocks.org/rdmpage/raw/9951904/	42.2884	13.0518	630876	Shogolev Igor	urn:lsid:catalogueoflife.org:taxon:fb5dd2d2-18fd-11e5-9774-bc764e0806fb:col20150623	Calidris temminckii	Animalia	Chordata	Aves	Charadriiformes	Scolopacidae	Calidris	temminckii	(Leisler, 1812)	ICZN	Calidris temminckii (Leisl.)
ZMUA	AVSE	ZMUA_Aves	ZMUA	PreservedSpecimen	671-266	GR-ZMUA_Aves-671-266	Ninni A.	1	F	adult	Whole animal (Stuffed)	1867	671	Italy	GR	Italy	Coordinates according to: http://bl.ocks.org/rdmpage/raw/9951904/	42.2884	13.0518	630876	Shogolev Igor	urn:lsid:catalogueoflife.org:taxon:e859493e-18fd-11e5-9774-bc764e0806fb:col20150623	Gavia arctica	Animalia	Chordata	Aves	Gaviiformes	Gaviidae	Gavia	arctica	(Linnaeus, 1758)	ICZN	Gavia arctica
ZMUA	AVSE	ZMUA_Aves	ZMUA	PreservedSpecimen	2362-1957	GR-ZMUA_Aves-2362-1957	Ninni A.	1			Whole animal (Stuffed)	1867	2362	Italy	GR	Italy	Coordinates according to: http://bl.ocks.org/rdmpage/raw/9951904/	42.2884	13.0518	630876	Shogolev Igor	urn:lsid:catalogueoflife.org:taxon:e6ed4357-18fd-11e5-9774-bc764e0806fb:col20150807	Prunella collaris	Animalia	Chordata	Aves	Passeriformes	Prunellidae	Prunella	collaris	(Scopoli, 1769)	ICZN	Prunella collaris
ZMUA	AVSE	ZMUA_Aves	ZMUA	PreservedSpecimen	710-305	GR-ZMUA_Aves-710-305	Ninni A.	1	F	adult	Whole animal (Stuffed)	1867	710	Italy	GR	Italy (Venice)	Coordinates according to: http://bl.ocks.org/rdmpage/raw/9951904/	45.5118	12.4365	48724	Shogolev Igor	urn:lsid:catalogueoflife.org:taxon:e866fe84-18fd-11e5-9774-bc764e0806fb:col20150623	Anas penelope	Animalia	Chordata	Aves	Anseriformes	Anatidae	Anas	penelope	Linnaeus, 1758	ICZN	Anas penelope L.
ZMUA	AVSE	ZMUA_Aves	ZMUA	PreservedSpecimen	1790-1385	GR-ZMUA_Aves-1790-1385	Ninni A.	1	F	adult	Whole animal (Stuffed)	1867	1790	Italy	GR	Italy (Lombardia)	Coordinates according to: http://bl.ocks.org/rdmpage/raw/9951904/	45.4898	9.75268	154032	Shogolev Igor	urn:lsid:catalogueoflife.org:taxon:e824a1b8-18fd-11e5-9774-bc764e0806fb:col20150623	Anthus spinoletta	Animalia	Chordata	Aves	Passeriformes	Motacillidae	Anthus	spinoletta	(Linnaeus, 1758)	ICZN	Anthus spinoletta (L.)
ZMUA	AVSE	ZMUA_Aves	ZMUA	PreservedSpecimen	1786-1381	GR-ZMUA_Aves-1786-1381	Ninni A.	1	F	juvenile	Whole animal (Stuffed)	1867	1786	Italy	GR	Italy	Coordinates according to: http://bl.ocks.org/rdmpage/raw/9951904/	42.2884	13.0518	630876	Shogolev Igor	urn:lsid:catalogueoflife.org:taxon:e6e57984-18fd-11e5-9774-bc764e0806fb:col20150623	Anthus richardi	Animalia	Chordata	Aves	Passeriformes	Motacillidae	Anthus	richardi	Vieillot, 1818	ICZN	Anthus richardi Vieill.
ZMUA	AVSE	ZMUA_Aves	ZMUA	PreservedSpecimen	635-230	GR-ZMUA_Aves-635-230	Ninni A.	1			Whole animal (Stuffed)	1867	635	Italy	GR	Italy	Coordinates according to: http://bl.ocks.org/rdmpage/raw/9951904/	42.2884	13.0518	630876	Shogolev Igor	urn:lsid:catalogueoflife.org:taxon:fbbf16d6-18fd-11e5-9774-bc764e0806fb:col20150623	Charadrius alexandrinus	Animalia	Chordata	Aves	Charadriiformes	Charadriidae	Charadrius	alexandrinus	Linnaeus, 1758	ICZN	Charadrius alexandrinus
ZMUA	AVSE	ZMUA_Aves	ZMUA	PreservedSpecimen	637-232	GR-ZMUA_Aves-637-232	Ninni A.	1	M	adult	Whole animal (Stuffed)	1867	637	Italy	GR	Italy	Coordinates according to: http://bl.ocks.org/rdmpage/raw/9951904/	42.2884	13.0518	630876	Shogolev Igor	urn:lsid:catalogueoflife.org:taxon:fbbf1aea-18fd-11e5-9774-bc764e0806fb:col20150623	Charadrius hiaticula	Animalia	Chordata	Aves	Charadriiformes	Charadriidae	Charadrius	hiaticula	Linnaeus, 1758	ICZN	Charadrius hiaticula L.
ZMUA	AVSE	ZMUA_Aves	ZMUA	PreservedSpecimen	670-265	GR-ZMUA_Aves-670-265	Ninni A.	1			Whole animal (Stuffed)	1867	670	Italy	GR	Italy	Coordinates according to: http://bl.ocks.org/rdmpage/raw/9951904/	42.2884	13.0518	630876	Shogolev Igor	urn:lsid:catalogueoflife.org:taxon:fb5dbb9b-18fd-11e5-9774-bc764e0806fb:col20150623	Limosa limosa	Animalia	Chordata	Aves	Charadriiformes	Scolopacidae	Limosa	limosa	(Linnaeus, 1758)	ICZN	Limosa limosa (L.), 1758
ZMUA	AVSE	ZMUA_Aves	ZMUA	PreservedSpecimen	1115-710	GR-ZMUA_Aves-1115-710	Ninni A.	1			Whole animal (Stuffed)	1867	1115	Italy	GR	Italy	Coordinates according to: http://bl.ocks.org/rdmpage/raw/9951904/	42.2884	13.0518	630876	Shogolev Igor	urn:lsid:catalogueoflife.org:taxon:edee04e7-18fd-11e5-9774-bc764e0806fb:col20150623	Dryocopus martius	Animalia	Chordata	Aves	Piciformes	Picidae	Dryocopus	martius	(Linnaeus, 1758)	ICZN	Dryocopus martius (L.)
ZMUA	AVSE	ZMUA_Aves	ZMUA	PreservedSpecimen	2537-2132	GR-ZMUA_Aves-2537-2132	Ninni A.	1	M	adult	Whole animal (Stuffed)	1867	2537	Italy	GR	Italy	Coordinates according to: http://bl.ocks.org/rdmpage/raw/9951904/	42.2884	13.0518	630876	Shogolev Igor	urn:lsid:catalogueoflife.org:taxon:e823b209-18fd-11e5-9774-bc764e0806fb:col20150623	Locustella fluviatilis	Animalia	Chordata	Aves	Passeriformes	Locustellidae	Locustella	fluviatilis	(Wolf, 1810)	ICZN	Locustella fluviatilis (Wolf.)
ZMUA	AVSE	ZMUA_Aves	ZMUA	PreservedSpecimen	2536-2131	GR-ZMUA_Aves-2536-2131	Ninni A.	1	M	adult	Whole animal (Stuffed)	1867	2536	Italy	GR	Italy	Coordinates according to: http://bl.ocks.org/rdmpage/raw/9951904/	42.2884	13.0518	630876	Shogolev Igor	urn:lsid:catalogueoflife.org:taxon:e81b3aa5-18fd-11e5-9774-bc764e0806fb:col20150623	Cisticola juncidis	Animalia	Chordata	Aves	Passeriformes	Cisticolidae	Cisticola	juncidis	(Rafinesque, 1810)	ICZN	Cisticola juncidis
ZMUA	AVSE	ZMUA_Aves	ZMUA	PreservedSpecimen	2539-2134	GR-ZMUA_Aves-2539-2134	Ninni A.	1	M	adult	Whole animal (Stuffed)	1867	2539	Italy	GR	Italy	Coordinates according to: http://bl.ocks.org/rdmpage/raw/9951904/	42.2884	13.0518	630876	Shogolev Igor	urn:lsid:catalogueoflife.org:taxon:e823b4a7-18fd-11e5-9774-bc764e0806fb:col20150623	Locustella naevia	Animalia	Chordata	Aves	Passeriformes	Locustellidae	Locustella	naevia	(Boddaert, 1783)	ICZN	Locustella naevia (Bodd.)
ZMUA	AVSE	ZMUA_Aves	ZMUA	PreservedSpecimen	2568-2163	GR-ZMUA_Aves-2568-2163	Ninni A.	1	M		Whole animal (Stuffed)	1867	2568	Italy	GR	Italy	Coordinates according to: http://bl.ocks.org/rdmpage/raw/9951904/	42.2884	13.0518	630876	Shogolev Igor	urn:lsid:catalogueoflife.org:taxon:e7b56d29-18fd-11e5-9774-bc764e0806fb:col20150807	Turdus iliacus	Animalia	Chordata	Aves	Passeriformes	Turdidae	Turdus	iliacus	Linnaeus, 1758	ICZN	Turdus iliacus L.
ZMUA	AVSE	ZMUA_Aves	ZMUA	PreservedSpecimen	2576-2171	GR-ZMUA_Aves-2576-2171	Ninni A.	1	M	adult	Whole animal (Stuffed)	1867	2576	Italy	GR	Italy	Coordinates according to: http://bl.ocks.org/rdmpage/raw/9951904/	42.2884	13.0518	630876	Shogolev Igor	urn:lsid:catalogueoflife.org:taxon:e7c62a7f-18fd-11e5-9774-bc764e0806fb:col20150807	Turdus philomelos	Animalia	Chordata	Aves	Passeriformes	Turdidae	Turdus	philomelos	C. L. Brehm, 1831	ICZN	Turdus philomelos C. L. Brehm.
ZMUA	AVSE	ZMUA_Aves	ZMUA	PreservedSpecimen	2571-2166	GR-ZMUA_Aves-2571-2166	Ninni A.	1	M	adult	Whole animal (Stuffed)	1867	2571	Italy	GR	Italy	Coordinates according to: http://bl.ocks.org/rdmpage/raw/9951904/	42.2884	13.0518	630876	Shogolev Igor	urn:lsid:catalogueoflife.org:taxon:e7c0c67d-18fd-11e5-9774-bc764e0806fb:col20150807	Turdus torquatus	Animalia	Chordata	Aves	Passeriformes	Turdidae	Turdus	torquatus	Linnaeus, 1758	ICZN	Turdus viscivorus L.
ZMUA	AVSE	ZMUA_Aves	ZMUA	PreservedSpecimen	640-235	GR-ZMUA_Aves-640-235	Ninni A.	1			Whole animal (Stuffed)	1867	640	Italy	GR	Italy	Coordinates according to: http://bl.ocks.org/rdmpage/raw/9951904/	42.2884	13.0518	630876	Shogolev Igor	urn:lsid:catalogueoflife.org:taxon:fbb1450d-18fd-11e5-9774-bc764e0806fb:col20150807	Pluvialis squatarola	Animalia	Chordata	Aves	Charadriiformes	Charadriidae	Pluvialis	squatarola	(Linnaeus, 1758)	ICZN	Pluvialis sguatarola (L.)
ZMUA	AVSE	ZMUA_Aves	ZMUA	PreservedSpecimen	1707-1302	GR-ZMUA_Aves-1707-1302	Ninni A.	1			Whole animal (Stuffed)	1867	1707		GR						Shogolev Igor	urn:lsid:catalogueoflife.org:taxon:e8594674-18fd-11e5-9774-bc764e0806fb:col20150623	Gavia stellata	Animalia	Chordata	Aves	Gaviiformes	Gaviidae	Gavia	stellata	(Pontoppidan, 1763)	ICZN	Gavia stellata
ZMUA	AVSE	ZMUA_Aves	ZMUA	PreservedSpecimen	2670-2265	GR-ZMUA_Aves-2670-2265	Ninni A.	1			Whole animal (Stuffed)	1867	2670		GR						Shogolev Igor	urn:lsid:catalogueoflife.org:taxon:0d19c3f4-18fe-11e5-9774-bc764e0806fb:col20150807	Sternula albifrons	Animalia	Chordata	Aves	Charadriiformes	Laridae	Sternula	albifrons	(Pallas, 1764)	ICZN	Sterna albifrons (Pall.)
ZMUA	AVSE	ZMUA_Aves	ZMUA	PreservedSpecimen	2465-2060	GR-ZMUA_Aves-2465-2060	Ross A. M.	1	M	adult	Whole animal (Stuffed)	1867	2465	Canada	GR	Canada	Coordinates according to: http://en.wikipedia.org/wiki/File:Canada_provinces_evolution_2.gif	56.8639	-97.9742	2496265	Shogolev Igor	urn:lsid:catalogueoflife.org:taxon:f82be2c1-18fd-11e5-9774-bc764e0806fb:col20150623	Dendroica caerulescens	Animalia	Chordata	Aves	Passeriformes	Parulidae	Dendroica	caerulescens	(J. F. Gmelin, 1789)	ICZN	Dendroica caerulescens
ZMUA	AVSE	ZMUA_Aves	ZMUA	PreservedSpecimen	930-525	GR-ZMUA_Aves-930-525	Schneider G.	1	M	adult	Whole animal (Stuffed)	1867	930	Brazil	GR	Brazil (Bahia)	Coordinates according to: http://bl.ocks.org/rdmpage/raw/9951904/	-26.8167	-52.0333	3036	Shogolev Igor	urn:lsid:catalogueoflife.org:taxon:fbbb7027-18fd-11e5-9774-bc764e0806fb:col20150623	Leptotila verreauxi	Animalia	Chordata	Aves	Columbiformes	Columbidae	Leptotila	verreauxi	(Bonaparte, 1855)	ICZN	Leptotila varreauxi Bonaparte, 1855
ZMUA	AVSE	ZMUA_Aves	ZMUA	PreservedSpecimen	681-276	GR-ZMUA_Aves-681-276	Schrader G.	1			Whole animal (Stuffed)	1867	681	Greece	GR	Attica	Coordinates according to: http://bl.ocks.org/rdmpage/raw/9951904/	37.9789	23.6696	50004	Shogolev Igor	urn:lsid:catalogueoflife.org:taxon:fb5dba31-18fd-11e5-9774-bc764e0806fb:col20150807	Philomachus pugnax	Animalia	Chordata	Aves	Charadriiformes	Scolopacidae	Philomachus	pugnax	(Linnaeus, 1758)	ICZN	Philomachus pugnax (L.)
ZMUA	AVSE	ZMUA_Aves	ZMUA	PreservedSpecimen	2292-1887	GR-ZMUA_Aves-2292-1887	Schrader G.	1			Whole animal (Stuffed)	1867	2292	Brazil	GR	Brazil	Coordinates according to: http://bl.ocks.org/rdmpage/raw/9951904/	-12.607	-54.423	2281819	Shogolev Igor	urn:lsid:catalogueoflife.org:taxon:e7b2828e-18fd-11e5-9774-bc764e0806fb:col20150807	Pachyramphus marginatus	Animalia	Chordata	Aves	Passeriformes	Cotingidae	Pachyramphus	marginatus	(Lichtenstein, 1823)	ICZN	Pachyramphus marginatus
ZMUA	AVSE	ZMUA_Aves	ZMUA	PreservedSpecimen	1296-891	GR-ZMUA_Aves-1296-891	Schrader G.	1	M		Whole animal (Stuffed)	1867	1296		GR						Shogolev Igor	urn:lsid:catalogueoflife.org:taxon:ee07e8b8-18fd-11e5-9774-bc764e0806fb:col20150623	Asio otus	Animalia	Chordata	Aves	Strigiformes	Strigidae	Asio	otus	(Linnaeus, 1758)	ICZN	Asio otus
ZMUA	AVSE	ZMUA_Aves	ZMUA	PreservedSpecimen	2198-1793	GR-ZMUA_Aves-2198-1793	Touzet N.	1	F		Whole animal (Stuffed)	1867	2198	Brazil	GR	Brazil	Coordinates according to: http://bl.ocks.org/rdmpage/raw/9951904/	-12.607	-54.423	2281819	Papastefanou Gabriella	urn:lsid:catalogueoflife.org:taxon:e7d84dfa-18fd-11e5-9774-bc764e0806fb:col20150807	Sicalis flaveola	Animalia	Chordata	Aves	Passeriformes	Emberizidae	Sicalis	flaveola	(Linnaeus, 1766)	ICZN	Sicalis flaveola
ZMUA	AVSE	ZMUA_Aves	ZMUA	PreservedSpecimen	2207-1802	GR-ZMUA_Aves-2207-1802	Touzet N.	1			Whole animal (Stuffed)	1867	2207	Brazil	GR	Brazil	Coordinates according to: http://bl.ocks.org/rdmpage/raw/9951904/	-12.607	-54.423	2281819	Papastefanou Gabriella	urn:lsid:catalogueoflife.org:taxon:e81be652-18fd-11e5-9774-bc764e0806fb:col20150623	Capsiempis flaveola	Animalia	Chordata	Aves	Passeriformes	Tyrannidae	Capsiempis	flaveola	(Lichtenstein, 1823)	ICZN	Phyloscartes flaveolus
ZMUA	AVSE	ZMUA_Aves	ZMUA	PreservedSpecimen	1025-620	GR-ZMUA_Aves-1025-620	Touzet N.	1			Whole animal (Stuffed)	1867	1025	Brazil	GR	Brazil	Coordinates according to: http://bl.ocks.org/rdmpage/raw/9951904/	-12.607	-54.423	2281819	Shogolev Igor	urn:lsid:catalogueoflife.org:taxon:f6928cd5-18fd-11e5-9774-bc764e0806fb:col20150807	Pulsatrix perspicillata	Animalia	Chordata	Aves	Strigiformes	Strigidae	Pulsatrix	perspicillata	(Latham, 1790)	ICZN	Pulsatrix perspicillata Latham. 1790
ZMUA	AVSE	ZMUA_Aves	ZMUA	PreservedSpecimen	1027-622	GR-ZMUA_Aves-1027-622	Touzet N.	1			Whole animal (Stuffed)	1867	1027	Brazil	GR	Brazil	Coordinates according to: http://bl.ocks.org/rdmpage/raw/9951904/	-12.607	-54.423	2281819	Shogolev Igor	urn:lsid:catalogueoflife.org:taxon:f6928cd5-18fd-11e5-9774-bc764e0806fb:col20150807	Pulsatrix perspicillata	Animalia	Chordata	Aves	Strigiformes	Strigidae	Pulsatrix	perspicillata	(Latham, 1790)	ICZN	Pulsatrix perspicillata Latham. 1790
ZMUA	AVSE	ZMUA_Aves	ZMUA	PreservedSpecimen	1400-995	GR-ZMUA_Aves-1400-995	Touzet N.	1			Whole animal (Stuffed)	1867	1400	Brazil	GR	Brazil	Coordinates according to: http://bl.ocks.org/rdmpage/raw/9951904/	-12.607	-54.423	2281819	Shogolev Igor	urn:lsid:catalogueoflife.org:taxon:f815826e-18fd-11e5-9774-bc764e0806fb:col20150807	Tapera naevia	Animalia	Chordata	Aves	Cuculiformes	Cuculidae	Tapera	naevia	(Linnaeus, 1766)	ICZN	Tapera naevia L., 1766
ZMUA	AVSE	ZMUA_Aves	ZMUA	PreservedSpecimen	2252-1847	GR-ZMUA_Aves-2252-1847	Touzet N.	1			Whole animal (Stuffed)	1867	2252	Brazil	GR	Brazil	Coordinates according to: http://bl.ocks.org/rdmpage/raw/9951904/	-12.607	-54.423	2281819	Shogolev Igor	urn:lsid:catalogueoflife.org:taxon:28c1c0e0-18fe-11e5-9774-bc764e0806fb:col20150623	Formicarius colma ruficeps	Animalia	Chordata	Aves	Passeriformes	Formicariidae	Formicarius	colma	(Spix, 1824)	ICZN	Formicarius colma ruficeps
ZMUA	AVSE	ZMUA_Aves	ZMUA	PreservedSpecimen	2137-1732	GR-ZMUA_Aves-2137-1732	Touzet N.	1			Whole animal (Stuffed)	1867	2137	Brazil	GR	Brazil	Coordinates according to: http://bl.ocks.org/rdmpage/raw/9951904/	-12.607	-54.423	2281819	Shogolev Igor	urn:lsid:catalogueoflife.org:taxon:e6eb57c3-18fd-11e5-9774-bc764e0806fb:col20150807	Philydor atricapillus	Animalia	Chordata	Aves	Passeriformes	Furnariidae	Philydor	atricapillus	(Wied-Neuwied, 1821)	ICZN	Philydor atricapillus
ZMUA	AVSE	ZMUA_Aves	ZMUA	PreservedSpecimen	2308-1903	GR-ZMUA_Aves-2308-1903	Touzet N.	1			Whole animal (Stuffed)	1867	2308	Brazil	GR	Brazil	Coordinates according to: http://bl.ocks.org/rdmpage/raw/9951904/	-12.607	-54.423	2281819	Shogolev Igor	urn:lsid:catalogueoflife.org:taxon:f68ff1b0-18fd-11e5-9774-bc764e0806fb:col20150807	Picumnus cirratus	Animalia	Chordata	Aves	Piciformes	Picidae	Picumnus	cirratus	Temminck, 1825	ICZN	Picumnus cirrhatus
ZMUA	AVSE	ZMUA_Aves	ZMUA	PreservedSpecimen	2224-1819	GR-ZMUA_Aves-2224-1819	Touzet N.	1			Whole animal (Stuffed)	1867	2224	Brazil	GR	Brazil	Coordinates according to: http://bl.ocks.org/rdmpage/raw/9951904/	-12.607	-54.423	2281819	Shogolev Igor	urn:lsid:catalogueoflife.org:taxon:e821598b-18fd-11e5-9774-bc764e0806fb:col20150623	Habia rubica	Animalia	Chordata	Aves	Passeriformes	Thraupidae	Habia	rubica	(Vieillot, 1817)	ICZN	Habia rubica
ZMUA	AVSE	ZMUA_Aves	ZMUA	PreservedSpecimen	2202-1797	GR-ZMUA_Aves-2202-1797	Touzet N.	1			Whole animal (Stuffed)	1867	2202	Brazil	GR	Brazil	Coordinates according to: http://bl.ocks.org/rdmpage/raw/9951904/	-12.607	-54.423	2281819	Shogolev Igor	urn:lsid:catalogueoflife.org:taxon:e6f0ef58-18fd-11e5-9774-bc764e0806fb:col20150807	Phaeomyias murina	Animalia	Chordata	Aves	Passeriformes	Tyrannidae	Phaeomyias	murina	(Spix, 1825)	ICZN	Phaeomyias murina
ZMUA	AVSE	ZMUA_Aves	ZMUA	PreservedSpecimen	2330-1925	GR-ZMUA_Aves-2330-1925	Touzet N.	1			Whole animal (Stuffed)	1867	2330	Brazil	GR	Brazil	Coordinates according to: http://bl.ocks.org/rdmpage/raw/9951904/	-12.607	-54.423	2281819	Shogolev Igor	urn:lsid:catalogueoflife.org:taxon:28a2f9a4-18fe-11e5-9774-bc764e0806fb:col20150807	Vireo olivaceus chivi	Animalia	Chordata	Aves	Passeriformes	Vireonidae	Vireo	olivaceus	(Vieillot, 1817)	ICZN	Vireo chivi
ZMUA	AVSE	ZMUA_Aves	ZMUA	PreservedSpecimen	1402-997	GR-ZMUA_Aves-1402-997	Touzet N.	1			Whole animal (Stuffed)	1867	1402	Brazil	GR	Brazil	Coordinates according to: http://bl.ocks.org/rdmpage/raw/9951904/	-12.607	-54.423	2281819	Shogolev Igor	urn:lsid:catalogueoflife.org:taxon:f8158f11-18fd-11e5-9774-bc764e0806fb:col20150807	Piaya cayana	Animalia	Chordata	Aves	Cuculiformes	Cuculidae	Piaya	cayana	(Linnaeus, 1766)	ICZN	Piaya cayana L. 1766
ZMUA	AVSE	ZMUA_Aves	ZMUA	PreservedSpecimen	2399-1994	GR-ZMUA_Aves-2399-1994	Touzet N.	1			Whole animal (Stuffed)	1867	2399	Brazil	GR	Brazil	Coordinates according to: http://bl.ocks.org/rdmpage/raw/9951904/	-12.607	-54.423	2281819	Shogolev Igor	urn:lsid:catalogueoflife.org:taxon:23b295be-18fe-11e5-9774-bc764e0806fb:col20150623	Hylocharis cyanus cyanus	Animalia	Chordata	Aves	Apodiformes	Trochilidae	Hylocharis	cyanus	(Vieillot, 1818)	ICZN	Hylocharis cyanus cyanus Vieillot, 1818
ZMUA	AVSE	ZMUA_Aves	ZMUA	PreservedSpecimen	1973-1568	GR-ZMUA_Aves-1973-1568	Touzet N.	1			Whole animal (Stuffed)	1867	1973	Brazil	GR	Brazil	Coordinates according to: http://bl.ocks.org/rdmpage/raw/9951904/	-12.607	-54.423	2281819	Shogolev Igor	urn:lsid:catalogueoflife.org:taxon:e6e4cb81-18fd-11e5-9774-bc764e0806fb:col20150623	Arremon taciturnus	Animalia	Chordata	Aves	Passeriformes	Emberizidae	Arremon	taciturnus	(Hermann, 1783)	ICZN	Arremon taciturnus
ZMUA	AVSE	ZMUA_Aves	ZMUA	PreservedSpecimen	1704-1299	GR-ZMUA_Aves-1704-1299	Touzet N.	1	F	adult	Whole animal (Stuffed)	1867	1704	Brazil	GR	Brazil	Coordinates according to: http://bl.ocks.org/rdmpage/raw/9951904/	-12.607	-54.423	2281819	Shogolev Igor	urn:lsid:catalogueoflife.org:taxon:eaacbd0f-ac8e-11e3-805d-020044200006:col20150401	Tangara mexicana	Animalia	Chordata	Aves	Passeriformes	Thraupidae	Tangara	mexicana	(Linnaeus, 1766)	ICZN	Tangara mexicana
ZMUA	AVSE	ZMUA_Aves	ZMUA	PreservedSpecimen	2096-1691	GR-ZMUA_Aves-2096-1691	Touzet N.	1			Whole animal (Stuffed)	1867	2096	Brazil	GR	Brazil	Coordinates according to: http://bl.ocks.org/rdmpage/raw/9951904/	-12.607	-54.423	2281819	Shogolev Igor	urn:lsid:catalogueoflife.org:taxon:ebe1974e-ac8e-11e3-805d-020044200006:col20150401	Cacicus haemorrhous	Animalia	Chordata	Aves	Passeriformes	Icteridae	Cacicus	haemorrhous	(Linnaeus, 1766)	ICZN	Cassicus haemorrhous
ZMUA	AVSE	ZMUA_Aves	ZMUA	PreservedSpecimen	2077-1672	GR-ZMUA_Aves-2077-1672	Touzet N.	1			Whole animal (Stuffed)	1867	2077	Brazil	GR	Brazil	Coordinates according to: http://bl.ocks.org/rdmpage/raw/9951904/	-12.607	-54.423	2281819	Shogolev Igor	urn:lsid:catalogueoflife.org:taxon:e625ce72-18fd-11e5-9774-bc764e0806fb:col20150807	Psarocolius decumanus	Animalia	Chordata	Aves	Passeriformes	Icteridae	Psarocolius	decumanus	(Pallas, 1769)	ICZN	Psarocolius decumanus Pallas, 1769
ZMUA	AVSE	ZMUA_Aves	ZMUA	PreservedSpecimen	1837-1432	GR-ZMUA_Aves-1837-1432	Touzet N.	1			Whole animal (Stuffed)	1867	1837	Brazil	GR	Brazil	Coordinates according to: http://bl.ocks.org/rdmpage/raw/9951904/	-12.607	-54.423	2281819	Shogolev Igor	urn:lsid:catalogueoflife.org:taxon:e81d139a-18fd-11e5-9774-bc764e0806fb:col20150623	Coereba flaveola	Animalia	Chordata	Aves	Passeriformes	Coerebidae	Coereba	flaveola	(Linnaeus, 1758)	ICZN	Coereba flaveola
ZMUA	AVSE	ZMUA_Aves	ZMUA	PreservedSpecimen	1892-1487	GR-ZMUA_Aves-1892-1487	Touzet N.	1			Whole animal (Stuffed)	1867	1892	Brazil	GR	Brazil	Coordinates according to: http://bl.ocks.org/rdmpage/raw/9951904/	-12.607	-54.423	2281819	Shogolev Igor	urn:lsid:catalogueoflife.org:taxon:e81d139a-18fd-11e5-9774-bc764e0806fb:col20150623	Coereba flaveola	Animalia	Chordata	Aves	Passeriformes	Coerebidae	Coereba	flaveola	(Linnaeus, 1758)	ICZN	Coereba flaveola
ZMUA	AVSE	ZMUA_Aves	ZMUA	PreservedSpecimen	929-524	GR-ZMUA_Aves-929-524	Touzet N.	1			Whole animal (Stuffed)	1867	929	Brazil	GR	Brazil	Coordinates according to: http://bl.ocks.org/rdmpage/raw/9951904/	-12.607	-54.423	2281819	Shogolev Igor	urn:lsid:catalogueoflife.org:taxon:fbbb7027-18fd-11e5-9774-bc764e0806fb:col20150623	Leptotila verreauxi	Animalia	Chordata	Aves	Columbiformes	Columbidae	Leptotila	verreauxi	(Bonaparte, 1855)	ICZN	Leptotila varreauxi Bonaparte, 1855
ZMUA	AVSE	ZMUA_Aves	ZMUA	PreservedSpecimen	931-526	GR-ZMUA_Aves-931-526	Touzet N.	1			Whole animal (Stuffed)	1867	931	Brazil	GR	Brazil	Coordinates according to: http://bl.ocks.org/rdmpage/raw/9951904/	-12.607	-54.423	2281819	Shogolev Igor	urn:lsid:catalogueoflife.org:taxon:fbbb7027-18fd-11e5-9774-bc764e0806fb:col20150623	Leptotila verreauxi	Animalia	Chordata	Aves	Columbiformes	Columbidae	Leptotila	verreauxi	(Bonaparte, 1855)	ICZN	Leptotila varreauxi Bonaparte, 1855
ZMUA	AVSE	ZMUA_Aves	ZMUA	PreservedSpecimen	1524-1119	GR-ZMUA_Aves-1524-1119	Touzet N.	1			Whole animal (Stuffed)	1867	1524	Brazil	GR	Brazil	Coordinates according to: http://bl.ocks.org/rdmpage/raw/9951904/	-12.607	-54.423	2281819	Shogolev Igor	urn:lsid:catalogueoflife.org:taxon:e81ad570-18fd-11e5-9774-bc764e0806fb:col20150623	Conopophaga melanops	Animalia	Chordata	Aves	Passeriformes	Conopophagidae	Conopophaga	melanops	(Vieillot, 1818)	ICZN	Conopophaga melanops
ZMUA	AVSE	ZMUA_Aves	ZMUA	PreservedSpecimen	1474-1069	GR-ZMUA_Aves-1474-1069	Touzet N.	1			Whole animal (Stuffed)	1867	1474	Brazil	GR	Brazil	Coordinates according to: http://bl.ocks.org/rdmpage/raw/9951904/	-12.607	-54.423	2281819	Shogolev Igor	urn:lsid:catalogueoflife.org:taxon:e81af513-18fd-11e5-9774-bc764e0806fb:col20150623	Colonia colonus	Animalia	Chordata	Aves	Passeriformes	Tyrannidae	Colonia	colonus	(Vieillot, 1818)	ICZN	Colonia colonus
ZMUA	AVSE	ZMUA_Aves	ZMUA	PreservedSpecimen	1478-1073	GR-ZMUA_Aves-1478-1073	Touzet N.	1			Whole animal (Stuffed)	1867	1478	Brazil	GR	Brazil	Coordinates according to: http://bl.ocks.org/rdmpage/raw/9951904/	-12.607	-54.423	2281819	Shogolev Igor	urn:lsid:catalogueoflife.org:taxon:e81af513-18fd-11e5-9774-bc764e0806fb:col20150623	Colonia colonus	Animalia	Chordata	Aves	Passeriformes	Tyrannidae	Colonia	colonus	(Vieillot, 1818)	ICZN	Colonia colonus
ZMUA	AVSE	ZMUA_Aves	ZMUA	PreservedSpecimen	1162-757	GR-ZMUA_Aves-1162-757	Touzet N.	1			Whole animal (Stuffed)	1867	1162	Brazil	GR	Brazil	Coordinates according to: http://bl.ocks.org/rdmpage/raw/9951904/	-12.607	-54.423	2281819	Shogolev Igor	urn:lsid:catalogueoflife.org:taxon:ee15998a-18fd-11e5-9774-bc764e0806fb:col20150623	Crotophaga sulcirostris	Animalia	Chordata	Aves	Cuculiformes	Cuculidae	Crotophaga	sulcirostris	Swainson, 1827	ICZN	Crotophaga sulcirostris Sw 1827
ZMUA	AVSE	ZMUA_Aves	ZMUA	PreservedSpecimen	1401-996	GR-ZMUA_Aves-1401-996	Touzet N.	1			Whole animal (Stuffed)	1867	1401	Brazil	GR	Brazil	Coordinates according to: http://bl.ocks.org/rdmpage/raw/9951904/	-12.607	-54.423	2281819	Shogolev Igor	urn:lsid:catalogueoflife.org:taxon:ee159ae8-18fd-11e5-9774-bc764e0806fb:col20150623	Crotophaga ani	Animalia	Chordata	Aves	Cuculiformes	Cuculidae	Crotophaga	ani	Linnaeus, 1758	ICZN	Crotophaga ani L. 1758
ZMUA	AVSE	ZMUA_Aves	ZMUA	PreservedSpecimen	1699-1294	GR-ZMUA_Aves-1699-1294	Touzet N.	1	M	adult	Whole animal (Stuffed)	1867	1699	Brazil	GR	Brazil	Coordinates according to: http://bl.ocks.org/rdmpage/raw/9951904/	-12.607	-54.423	2281819	Shogolev Igor	urn:lsid:catalogueoflife.org:taxon:e7b0cd2d-18fd-11e5-9774-bc764e0806fb:col20150623	Euphonia violacea	Animalia	Chordata	Aves	Passeriformes	Thraupidae	Euphonia	violacea	(Linnaeus, 1758)	ICZN	Euphonia violacea
ZMUA	AVSE	ZMUA_Aves	ZMUA	PreservedSpecimen	1730-1325	GR-ZMUA_Aves-1730-1325	Touzet N.	1	F	adult	Whole animal (Stuffed)	1867	1730	Brazil	GR	Brazil	Coordinates according to: http://bl.ocks.org/rdmpage/raw/9951904/	-12.607	-54.423	2281819	Shogolev Igor	urn:lsid:catalogueoflife.org:taxon:e7b0cd2d-18fd-11e5-9774-bc764e0806fb:col20150623	Euphonia violacea	Animalia	Chordata	Aves	Passeriformes	Thraupidae	Euphonia	violacea	(Linnaeus, 1758)	ICZN	Euphonia violacea
ZMUA	AVSE	ZMUA_Aves	ZMUA	PreservedSpecimen	1526-1121	GR-ZMUA_Aves-1526-1121	Touzet N.	1			Whole animal (Stuffed)	1867	1526	Brazil	GR	Brazil	Coordinates according to: http://bl.ocks.org/rdmpage/raw/9951904/	-12.607	-54.423	2281819	Shogolev Igor	urn:lsid:catalogueoflife.org:taxon:e7b23690-18fd-11e5-9774-bc764e0806fb:col20150623	Drymophila squamata	Animalia	Chordata	Aves	Passeriformes	Thamnophilidae	Drymophila	squamata	(Lichtenstein, 1823)	ICZN	Drymophila sguamata
ZMUA	AVSE	ZMUA_Aves	ZMUA	PreservedSpecimen	1525-1120	GR-ZMUA_Aves-1525-1120	Touzet N.	1			Whole animal (Stuffed)	1867	1525	Brazil	GR	Brazil	Coordinates according to: http://bl.ocks.org/rdmpage/raw/9951904/	-12.607	-54.423	2281819	Shogolev Igor	urn:lsid:catalogueoflife.org:taxon:e81e5c55-18fd-11e5-9774-bc764e0806fb:col20150730	Myrmotherula axillaris	Animalia	Chordata	Aves	Passeriformes	Thamnophilidae	Myrmotherula	axillaris	(Vieillot, 1817)	ICZN	Myrmotherula axillaris
ZMUA	AVSE	ZMUA_Aves	ZMUA	PreservedSpecimen	1528-1123	GR-ZMUA_Aves-1528-1123	Touzet N.	1			Whole animal (Stuffed)	1867	1528	Brazil	GR	Brazil	Coordinates according to: http://bl.ocks.org/rdmpage/raw/9951904/	-12.607	-54.423	2281819	Shogolev Igor	urn:lsid:catalogueoflife.org:taxon:e81e5c55-18fd-11e5-9774-bc764e0806fb:col20150730	Myrmotherula axillaris	Animalia	Chordata	Aves	Passeriformes	Thamnophilidae	Myrmotherula	axillaris	(Vieillot, 1817)	ICZN	Myrmotherula axillaris
ZMUA	AVSE	ZMUA_Aves	ZMUA	PreservedSpecimen	1918-1513	GR-ZMUA_Aves-1918-1513	Touzet N.	1			Whole animal (Stuffed)	1867	1918	Brazil	GR	Brazil	Coordinates according to: http://bl.ocks.org/rdmpage/raw/9951904/	-12.607	-54.423	2281819	Shogolev Igor	urn:lsid:catalogueoflife.org:taxon:e7d84dfa-18fd-11e5-9774-bc764e0806fb:col20150807	Sicalis flaveola	Animalia	Chordata	Aves	Passeriformes	Emberizidae	Sicalis	flaveola	(Linnaeus, 1766)	ICZN	Sicalis flaveola
ZMUA	AVSE	ZMUA_Aves	ZMUA	PreservedSpecimen	1222-817	GR-ZMUA_Aves-1222-817	Touzet N.	1			Whole animal (Stuffed)	1867	1222	Brazil	GR	Brazil	Coordinates according to: http://bl.ocks.org/rdmpage/raw/9951904/	-12.607	-54.423	2281819	Shogolev Igor	urn:lsid:catalogueoflife.org:taxon:033af1c4-ac8f-11e3-805d-020044200006:col20150401	Galbula galbula	Animalia	Chordata	Aves	Galbuliformes	Galbulidae	Galbula	galbula	(Linnaeus, 1766)	ICZN	Galbula galbula Yieill.
ZMUA	AVSE	ZMUA_Aves	ZMUA	PreservedSpecimen	1458-1053	GR-ZMUA_Aves-1458-1053	Touzet N.	1	M	adult	Whole animal (Stuffed)	1867	1458	Brazil	GR	Brazil	Coordinates according to: http://bl.ocks.org/rdmpage/raw/9951904/	-12.607	-54.423	2281819	Shogolev Igor	urn:lsid:catalogueoflife.org:taxon:e8202e78-18fd-11e5-9774-bc764e0806fb:col20150730	Manacus manacus	Animalia	Chordata	Aves	Passeriformes	Pipridae	Manacus	manacus	(Linnaeus, 1766)	ICZN	Manacus manacus
ZMUA	AVSE	ZMUA_Aves	ZMUA	PreservedSpecimen	2119-1714	GR-ZMUA_Aves-2119-1714	Touzet N.	1			Whole animal (Stuffed)	1867	2119	Brazil	GR	Brazil	Coordinates according to: http://bl.ocks.org/rdmpage/raw/9951904/	-12.607	-54.423	2281819	Shogolev Igor	urn:lsid:catalogueoflife.org:taxon:e825ac64-18fd-11e5-9774-bc764e0806fb:col20150730	Molothrus bonariensis	Animalia	Chordata	Aves	Passeriformes	Icteridae	Molothrus	bonariensis	(Gmelin, 1789)	ICZN	Molothrus bonariensis
ZMUA	AVSE	ZMUA_Aves	ZMUA	PreservedSpecimen	1490-1085	GR-ZMUA_Aves-1490-1085	Touzet N.	1	M	adult	Whole animal (Stuffed)	1867	1490	Brazil	GR	Brazil	Coordinates according to: http://bl.ocks.org/rdmpage/raw/9951904/	-12.607	-54.423	2281819	Shogolev Igor	urn:lsid:catalogueoflife.org:taxon:e7c7559b-18fd-11e5-9774-bc764e0806fb:col20150730	Myiodynastes maculatus	Animalia	Chordata	Aves	Passeriformes	Tyrannidae	Myiodynastes	maculatus	(Statius Muller, 1776)	ICZN	Myiodynastes maculatus
ZMUA	AVSE	ZMUA_Aves	ZMUA	PreservedSpecimen	1493-1088	GR-ZMUA_Aves-1493-1088	Touzet N.	1	F	adult	Whole animal (Stuffed)	1867	1493	Brazil	GR	Brazil	Coordinates according to: http://bl.ocks.org/rdmpage/raw/9951904/	-12.607	-54.423	2281819	Shogolev Igor	urn:lsid:catalogueoflife.org:taxon:e7c7559b-18fd-11e5-9774-bc764e0806fb:col20150730	Myiodynastes maculatus	Animalia	Chordata	Aves	Passeriformes	Tyrannidae	Myiodynastes	maculatus	(Statius Muller, 1776)	ICZN	Myiodynastes maculatus
ZMUA	AVSE	ZMUA_Aves	ZMUA	PreservedSpecimen	1482-1077	GR-ZMUA_Aves-1482-1077	Touzet N.	1			Whole animal (Stuffed)	1867	1482	Brazil	GR	Brazil	Coordinates according to: http://bl.ocks.org/rdmpage/raw/9951904/	-12.607	-54.423	2281819	Shogolev Igor	urn:lsid:catalogueoflife.org:taxon:e6f105e4-18fd-11e5-9774-bc764e0806fb:col20150730	Myiozetetes cayanensis	Animalia	Chordata	Aves	Passeriformes	Tyrannidae	Myiozetetes	cayanensis	(Linnaeus, 1766)	ICZN	Myiozetetes cayanensis
ZMUA	AVSE	ZMUA_Aves	ZMUA	PreservedSpecimen	904-499	GR-ZMUA_Aves-904-499	Touzet N.	1			Whole animal (Stuffed)	1867	904	Brazil	GR	Brazil	Coordinates according to: http://bl.ocks.org/rdmpage/raw/9951904/	-12.607	-54.423	2281819	Shogolev Igor	urn:lsid:catalogueoflife.org:taxon:e8217ede-18fd-11e5-9774-bc764e0806fb:col20150623	Hemithraupis ruficapilla	Animalia	Chordata	Aves	Passeriformes	Thraupidae	Hemithraupis	ruficapilla	(Vieillot, 1818)	ICZN	Hemithraupis ruficapilla
ZMUA	AVSE	ZMUA_Aves	ZMUA	PreservedSpecimen	1441-1036	GR-ZMUA_Aves-1441-1036	Touzet N.	1	M	adult	Whole animal (Stuffed)	1867	1441	Brazil	GR	Brazil	Coordinates according to: http://bl.ocks.org/rdmpage/raw/9951904/	-12.607	-54.423	2281819	Shogolev Igor	urn:lsid:catalogueoflife.org:taxon:e7b212c8-18fd-11e5-9774-bc764e0806fb:col20150807	Pachyramphus viridis	Animalia	Chordata	Aves	Passeriformes	Cotingidae	Pachyramphus	viridis	(Vieillot, 1816)	ICZN	Pachyramphus viridis
ZMUA	AVSE	ZMUA_Aves	ZMUA	PreservedSpecimen	1445-1040	GR-ZMUA_Aves-1445-1040	Touzet N.	1	F	adult	Whole animal (Stuffed)	1867	1445	Brazil	GR	Brazil	Coordinates according to: http://bl.ocks.org/rdmpage/raw/9951904/	-12.607	-54.423	2281819	Shogolev Igor	urn:lsid:catalogueoflife.org:taxon:e7b212c8-18fd-11e5-9774-bc764e0806fb:col20150807	Pachyramphus viridis	Animalia	Chordata	Aves	Passeriformes	Cotingidae	Pachyramphus	viridis	(Vieillot, 1816)	ICZN	Pachyramphus viridis
ZMUA	AVSE	ZMUA_Aves	ZMUA	PreservedSpecimen	1227-822	GR-ZMUA_Aves-1227-822	Touzet N.	1	M	adult	Whole animal (Stuffed)	1867	1227	Brazil	GR	Brazil	Coordinates according to: http://bl.ocks.org/rdmpage/raw/9951904/	-12.607	-54.423	2281819	Shogolev Igor	urn:lsid:catalogueoflife.org:taxon:edee10ea-18fd-11e5-9774-bc764e0806fb:col20150623	Celeus flavescens	Animalia	Chordata	Aves	Piciformes	Picidae	Celeus	flavescens	(Gmelin, 1788)	ICZN	Celeus flavescens
ZMUA	AVSE	ZMUA_Aves	ZMUA	PreservedSpecimen	1462-1057	GR-ZMUA_Aves-1462-1057	Touzet N.	1			Whole animal (Stuffed)	1867	1462	Brazil	GR	Brazil	Coordinates according to: http://bl.ocks.org/rdmpage/raw/9951904/	-12.607	-54.423	2281819	Shogolev Igor	urn:lsid:catalogueoflife.org:taxon:e81cac50-18fd-11e5-9774-bc764e0806fb:col20150623	Chiroxiphia caudata	Animalia	Chordata	Aves	Passeriformes	Pipridae	Chiroxiphia	caudata	(Shaw, 1793)	ICZN	Chiroxiphia caudata
ZMUA	AVSE	ZMUA_Aves	ZMUA	PreservedSpecimen	1466-1061	GR-ZMUA_Aves-1466-1061	Touzet N.	1			Whole animal (Stuffed)	1867	1466	Brazil	GR	Brazil	Coordinates according to: http://bl.ocks.org/rdmpage/raw/9951904/	-12.607	-54.423	2281819	Shogolev Igor	urn:lsid:catalogueoflife.org:taxon:219bd560-18fe-11e5-9774-bc764e0806fb:col20150730	Machaeropterus regulus regulus	Animalia	Chordata	Aves	Passeriformes	Pipridae	Machaeropterus	regulus	(Hahn, 1819)	ICZN	Machaeropterus regulus regulus
ZMUA	AVSE	ZMUA_Aves	ZMUA	PreservedSpecimen	1467-1062	GR-ZMUA_Aves-1467-1062	Touzet N.	1			Whole animal (Stuffed)	1867	1467	Brazil	GR	Brazil	Coordinates according to: http://bl.ocks.org/rdmpage/raw/9951904/	-12.607	-54.423	2281819	Shogolev Igor	urn:lsid:catalogueoflife.org:taxon:219bd560-18fe-11e5-9774-bc764e0806fb:col20150730	Machaeropterus regulus regulus	Animalia	Chordata	Aves	Passeriformes	Pipridae	Machaeropterus	regulus	(Hahn, 1819)	ICZN	Machaeropterus regulus regulus
ZMUA	AVSE	ZMUA_Aves	ZMUA	PreservedSpecimen	1469-1064	GR-ZMUA_Aves-1469-1064	Touzet N.	1			Whole animal (Stuffed)	1867	1469	Brazil	GR	Brazil	Coordinates according to: http://bl.ocks.org/rdmpage/raw/9951904/	-12.607	-54.423	2281819	Shogolev Igor	urn:lsid:catalogueoflife.org:taxon:e824380d-18fd-11e5-9774-bc764e0806fb:col20150730	Machaeropterus regulus	Animalia	Chordata	Aves	Passeriformes	Pipridae	Machaeropterus	regulus	(Hahn, 1819)	ICZN	Machaeropterus regulus
ZMUA	AVSE	ZMUA_Aves	ZMUA	PreservedSpecimen	1980-1575	GR-ZMUA_Aves-1980-1575	Touzet N.	1			Whole animal (Stuffed)	1867	1980	Brazil	GR	Brazil	Coordinates according to: http://bl.ocks.org/rdmpage/raw/9951904/	-12.607	-54.423	2281819	Shogolev Igor	urn:lsid:catalogueoflife.org:taxon:e81c25ea-18fd-11e5-9774-bc764e0806fb:col20150623	Caryothraustes canadensis	Animalia	Chordata	Aves	Passeriformes	Cardinalidae	Caryothraustes	canadensis	(Linnaeus, 1766)	ICZN	Caryothraustes canadensis
ZMUA	AVSE	ZMUA_Aves	ZMUA	PreservedSpecimen	1416-1011	GR-ZMUA_Aves-1416-1011	Touzet N.	1			Whole animal (Stuffed)	1867	1416	Brazil	GR	Brazil	Coordinates according to: http://bl.ocks.org/rdmpage/raw/9951904/	-12.607	-54.423	2281819	Shogolev Igor	urn:lsid:catalogueoflife.org:taxon:e7b962d4-18fd-11e5-9774-bc764e0806fb:col20150807	Pyroderus scutatus	Animalia	Chordata	Aves	Passeriformes	Cotingidae	Pyroderus	scutatus	(Shaw, 1792)	ICZN	Pyroderus scutatus
ZMUA	AVSE	ZMUA_Aves	ZMUA	PreservedSpecimen	1603-1198	GR-ZMUA_Aves-1603-1198	Touzet N.	1			Whole animal (Stuffed)	1867	1603	Brazil	GR	Brazil	Coordinates according to: http://bl.ocks.org/rdmpage/raw/9951904/	-12.607	-54.423	2281819	Shogolev Igor	urn:lsid:catalogueoflife.org:taxon:e8200e2c-18fd-11e5-9774-bc764e0806fb:col20150730	Megarynchus pitangua	Animalia	Chordata	Aves	Passeriformes	Tyrannidae	Megarynchus	pitangua	(Linnaeus, 1766)	ICZN	Megarhynchus pitangua
ZMUA	AVSE	ZMUA_Aves	ZMUA	PreservedSpecimen	1726-1321	GR-ZMUA_Aves-1726-1321	Touzet N.	1			Whole animal (Stuffed)	1867	1726	Brazil	GR	Brazil	Coordinates according to: http://bl.ocks.org/rdmpage/raw/9951904/	-12.607	-54.423	2281819	Shogolev Igor	urn:lsid:catalogueoflife.org:taxon:e6e45956-18fd-11e5-9774-bc764e0806fb:col20150623	Automolus leucophthalmus	Animalia	Chordata	Aves	Passeriformes	Furnariidae	Automolus	leucophthalmus	(Wied-Neuwied, 1821)	ICZN	Automolus leucophthalmus
ZMUA	AVSE	ZMUA_Aves	ZMUA	PreservedSpecimen	1874-1469	GR-ZMUA_Aves-1874-1469	Touzet N.	1			Whole animal (Stuffed)	1867	1874	Brazil	GR	Brazil	Coordinates according to: http://bl.ocks.org/rdmpage/raw/9951904/	-12.607	-54.423	2281819	Shogolev Igor	urn:lsid:catalogueoflife.org:taxon:e7c8139b-18fd-11e5-9774-bc764e0806fb:col20150807	Thraupis cyanoptera	Animalia	Chordata	Aves	Passeriformes	Thraupidae	Thraupis	cyanoptera	(Vieillot, 1817)	ICZN	Thraupis cyanoptera
ZMUA	AVSE	ZMUA_Aves	ZMUA	PreservedSpecimen	1873-1468	GR-ZMUA_Aves-1873-1468	Touzet N.	1			Whole animal (Stuffed)	1867	1873	Brazil	GR	Brazil	Coordinates according to: http://bl.ocks.org/rdmpage/raw/9951904/	-12.607	-54.423	2281819	Shogolev Igor	urn:lsid:catalogueoflife.org:taxon:e7c80e45-18fd-11e5-9774-bc764e0806fb:col20150807	Thraupis palmarum	Animalia	Chordata	Aves	Passeriformes	Thraupidae	Thraupis	palmarum	(Wied-Neuwied, 1821)	ICZN	Thraupis palmarum
ZMUA	AVSE	ZMUA_Aves	ZMUA	PreservedSpecimen	1960-1555	GR-ZMUA_Aves-1960-1555	Touzet N.	1	F	adult	Whole animal (Stuffed)	1867	1960	Brazil	GR	Brazil	Coordinates according to: http://bl.ocks.org/rdmpage/raw/9951904/	-12.607	-54.423	2281819	Shogolev Igor	urn:lsid:catalogueoflife.org:taxon:e7c80f9a-18fd-11e5-9774-bc764e0806fb:col20150807	Thraupis ornata	Animalia	Chordata	Aves	Passeriformes	Thraupidae	Thraupis	ornata	(Sparrman, 1789)	ICZN	Thraupis ornata
ZMUA	AVSE	ZMUA_Aves	ZMUA	PreservedSpecimen	965-560	GR-ZMUA_Aves-965-560	Touzet N.	1			Whole animal (Stuffed)	1867	965	Brazil	GR	Brazil	Coordinates according to: http://bl.ocks.org/rdmpage/raw/9951904/	-12.607	-54.423	2281819	Shogolev Igor	urn:lsid:catalogueoflife.org:taxon:e7c89a5e-18fd-11e5-9774-bc764e0806fb:col20150807	Tangara seledon	Animalia	Chordata	Aves	Passeriformes	Thraupidae	Tangara	seledon	(Statius Muller, 1776)	ICZN	Tangara seledon
ZMUA	AVSE	ZMUA_Aves	ZMUA	PreservedSpecimen	1509-1104	GR-ZMUA_Aves-1509-1104	Touzet N.	1			Whole animal (Stuffed)	1867	1509	Brazil	GR	Brazil	Coordinates according to: http://bl.ocks.org/rdmpage/raw/9951904/	-12.607	-54.423	2281819	Shogolev Igor	urn:lsid:catalogueoflife.org:taxon:e6e38579-18fd-11e5-9774-bc764e0806fb:col20150623	Batara cinerea	Animalia	Chordata	Aves	Passeriformes	Thamnophilidae	Batara	cinerea	(Vieillot, 1819)	ICZN	Batara cinerea
ZMUA	AVSE	ZMUA_Aves	ZMUA	PreservedSpecimen	1503-1098	GR-ZMUA_Aves-1503-1098	Touzet N.	1	F	adult	Whole animal (Stuffed)	1867	1503	Brazil	GR	Brazil	Coordinates according to: http://bl.ocks.org/rdmpage/raw/9951904/	-12.607	-54.423	2281819	Shogolev Igor	urn:lsid:catalogueoflife.org:taxon:e7abb06e-18fd-11e5-9774-bc764e0806fb:col20150807	Thamnophilus palliatus	Animalia	Chordata	Aves	Passeriformes	Thamnophilidae	Thamnophilus	palliatus	(Lichtenstein, 1823)	ICZN	Thamnophilus palliatus
ZMUA	AVSE	ZMUA_Aves	ZMUA	PreservedSpecimen	801-396	GR-ZMUA_Aves-801-396	Touzet N.	1			Whole animal (Stuffed)	1867	801	Brazil	GR	Brazil	Coordinates according to: http://bl.ocks.org/rdmpage/raw/9951904/	-12.607	-54.423	2281819	Shogolev Igor	urn:lsid:catalogueoflife.org:taxon:e7b15532-18fd-11e5-9774-bc764e0806fb:col20150730	Myiarchus tyrannulus	Animalia	Chordata	Aves	Passeriformes	Tyrannidae	Myiarchus	tyrannulus	(Statius Muller, 1776)	ICZN	Myiarchus tyrannulus
ZMUA	AVSE	ZMUA_Aves	ZMUA	PreservedSpecimen	1448-1043	GR-ZMUA_Aves-1448-1043	Touzet N.	1			Whole animal (Stuffed)	1867	1448	Brazil	GR	Brazil	Coordinates according to: http://bl.ocks.org/rdmpage/raw/9951904/	-12.607	-54.423	2281819	Shogolev Igor	urn:lsid:catalogueoflife.org:taxon:e7b15532-18fd-11e5-9774-bc764e0806fb:col20150730	Myiarchus tyrannulus	Animalia	Chordata	Aves	Passeriformes	Tyrannidae	Myiarchus	tyrannulus	(Statius Muller, 1776)	ICZN	Myiarchus tyrannulus
ZMUA	AVSE	ZMUA_Aves	ZMUA	PreservedSpecimen	1983-1578	GR-ZMUA_Aves-1983-1578	Touzet N.	1	M	adult	Whole animal (Stuffed)	1867	1983	Brazil	GR	Brazil	Coordinates according to: http://bl.ocks.org/rdmpage/raw/9951904/	-12.607	-54.423	2281819	Shogolev Igor	urn:lsid:catalogueoflife.org:taxon:e7b99be0-18fd-11e5-9774-bc764e0806fb:col20150807	Volatinia jacarina	Animalia	Chordata	Aves	Passeriformes	Emberizidae	Volatinia	jacarina	(Linnaeus, 1766)	ICZN	Volatinia jacarina
ZMUA	AVSE	ZMUA_Aves	ZMUA	PreservedSpecimen	1661-1256	GR-ZMUA_Aves-1661-1256	Touzet N.	1			Whole animal (Stuffed)	1867	1661	Brazil	GR	Brazil	Coordinates according to: http://bl.ocks.org/rdmpage/raw/9951904/	-12.607	-54.423	2281819	Shogolev Igor	urn:lsid:catalogueoflife.org:taxon:f63aa8f7-18fd-11e5-9774-bc764e0806fb:col20150623	Caprimulgus rufus	Animalia	Chordata	Aves	Strigiformes	Caprimulgidae	Caprimulgus	rufus	Boddaert, 1783	ICZN	Caprimulgus rufus Boddaer 1783
ZMUA	AVSE	ZMUA_Aves	ZMUA	PreservedSpecimen	2276-1871	GR-ZMUA_Aves-2276-1871	Touzet N.	1			Whole animal (Stuffed)	1867	2276	Brazil	GR	Brazil	Coordinates according to: http://bl.ocks.org/rdmpage/raw/9951904/	-12.607	-54.423	2281819	Shogolev Igor	urn:lsid:catalogueoflife.org:taxon:e6e5caf1-18fd-11e5-9774-bc764e0806fb:col20150623	Cyanocompsa brissonii	Animalia	Chordata	Aves	Passeriformes	Cardinalidae	Cyanocompsa	brissonii	(Lichtenstein, 1823)	ICZN	Cyanocompsa cyanea
ZMUA	AVSE	ZMUA_Aves	ZMUA	PreservedSpecimen	2229-1824	GR-ZMUA_Aves-2229-1824	Touzet N.	1			Whole animal (Stuffed)	1867	2229	Brazil	GR	Brazil	Coordinates according to: http://bl.ocks.org/rdmpage/raw/9951904/	-12.607	-54.423	2281819	Shogolev Igor	urn:lsid:catalogueoflife.org:taxon:e7b95c0b-18fd-11e5-9774-bc764e0806fb:col20150807	Saltator maximus	Animalia	Chordata	Aves	Passeriformes	Cardinalidae	Saltator	maximus	(Statius Muller, 1776)	ICZN	Saltator maximus
ZMUA	AVSE	ZMUA_Aves	ZMUA	PreservedSpecimen	2604-2199	GR-ZMUA_Aves-2604-2199	Touzet N.	1			Whole animal (Stuffed)	1867	2604	Brazil	GR	Brazil	Coordinates according to: http://bl.ocks.org/rdmpage/raw/9951904/	-12.607	-54.423	2281819	Shogolev Igor	urn:lsid:catalogueoflife.org:taxon:e81ad82a-18fd-11e5-9774-bc764e0806fb:col20150623	Conopophaga lineata	Animalia	Chordata	Aves	Passeriformes	Conopophagidae	Conopophaga	lineata	(Wied-Neuwied, 1831)	ICZN	Conopophaga lineata
ZMUA	AVSE	ZMUA_Aves	ZMUA	PreservedSpecimen	2423-2018	GR-ZMUA_Aves-2423-2018	Touzet N.	1			Whole animal (Stuffed)	1867	2423	Brazil	GR	Brazil	Coordinates according to: http://bl.ocks.org/rdmpage/raw/9951904/	-12.607	-54.423	2281819	Shogolev Igor	urn:lsid:catalogueoflife.org:taxon:e8232dee-18fd-11e5-9774-bc764e0806fb:col20150623	Laniocera hypopyrra	Animalia	Chordata	Aves	Passeriformes	Cotingidae	Laniocera	hypopyrra	(Vieillot, 1817)	ICZN	Laniocera hypopyrrha
ZMUA	AVSE	ZMUA_Aves	ZMUA	PreservedSpecimen	2160-1755	GR-ZMUA_Aves-2160-1755	Touzet N.	1			Whole animal (Stuffed)	1867	2160	Brazil	GR	Brazil	Coordinates according to: http://bl.ocks.org/rdmpage/raw/9951904/	-12.607	-54.423	2281819	Shogolev Igor	urn:lsid:catalogueoflife.org:taxon:e7b2828e-18fd-11e5-9774-bc764e0806fb:col20150807	Pachyramphus marginatus	Animalia	Chordata	Aves	Passeriformes	Cotingidae	Pachyramphus	marginatus	(Lichtenstein, 1823)	ICZN	Pachyramphus marginatus
ZMUA	AVSE	ZMUA_Aves	ZMUA	PreservedSpecimen	2242-1837	GR-ZMUA_Aves-2242-1837	Touzet N.	1			Whole animal (Stuffed)	1867	2242	Brazil	GR	Brazil	Coordinates according to: http://bl.ocks.org/rdmpage/raw/9951904/	-12.607	-54.423	2281819	Shogolev Igor	urn:lsid:catalogueoflife.org:taxon:e7b2828e-18fd-11e5-9774-bc764e0806fb:col20150807	Pachyramphus marginatus	Animalia	Chordata	Aves	Passeriformes	Cotingidae	Pachyramphus	marginatus	(Lichtenstein, 1823)	ICZN	Pachyramphus marginatus
ZMUA	AVSE	ZMUA_Aves	ZMUA	PreservedSpecimen	2325-1920	GR-ZMUA_Aves-2325-1920	Touzet N.	1			Whole animal (Stuffed)	1867	2325	Brazil	GR	Brazil	Coordinates according to: http://bl.ocks.org/rdmpage/raw/9951904/	-12.607	-54.423	2281819	Shogolev Igor	urn:lsid:catalogueoflife.org:taxon:e7b2828e-18fd-11e5-9774-bc764e0806fb:col20150807	Pachyramphus marginatus	Animalia	Chordata	Aves	Passeriformes	Cotingidae	Pachyramphus	marginatus	(Lichtenstein, 1823)	ICZN	Pachyramphus marginatus
ZMUA	AVSE	ZMUA_Aves	ZMUA	PreservedSpecimen	2142-1737	GR-ZMUA_Aves-2142-1737	Touzet N.	1			Whole animal (Stuffed)	1867	2142	Brazil	GR	Brazil	Coordinates according to: http://bl.ocks.org/rdmpage/raw/9951904/	-12.607	-54.423	2281819	Shogolev Igor	urn:lsid:catalogueoflife.org:taxon:e7b279f4-18fd-11e5-9774-bc764e0806fb:col20150807	Pachyramphus surinamus	Animalia	Chordata	Aves	Passeriformes	Cotingidae	Pachyramphus	surinamus	(Linnaeus, 1766)	ICZN	Pachyramphus surinamus
ZMUA	AVSE	ZMUA_Aves	ZMUA	PreservedSpecimen	2143-1738	GR-ZMUA_Aves-2143-1738	Touzet N.	1			Whole animal (Stuffed)	1867	2143	Brazil	GR	Brazil	Coordinates according to: http://bl.ocks.org/rdmpage/raw/9951904/	-12.607	-54.423	2281819	Shogolev Igor	urn:lsid:catalogueoflife.org:taxon:e7b280bb-18fd-11e5-9774-bc764e0806fb:col20150807	Pachyramphus minor	Animalia	Chordata	Aves	Passeriformes	Cotingidae	Pachyramphus	minor	(Lesson, 1831)	ICZN	Platypsaris minor
ZMUA	AVSE	ZMUA_Aves	ZMUA	PreservedSpecimen	2159-1754	GR-ZMUA_Aves-2159-1754	Touzet N.	1			Whole animal (Stuffed)	1867	2159	Brazil	GR	Brazil	Coordinates according to: http://bl.ocks.org/rdmpage/raw/9951904/	-12.607	-54.423	2281819	Shogolev Igor	urn:lsid:catalogueoflife.org:taxon:e7b280bb-18fd-11e5-9774-bc764e0806fb:col20150807	Pachyramphus minor	Animalia	Chordata	Aves	Passeriformes	Cotingidae	Pachyramphus	minor	(Lesson, 1831)	ICZN	Platypsaris minor
ZMUA	AVSE	ZMUA_Aves	ZMUA	PreservedSpecimen	1332-927	GR-ZMUA_Aves-1332-927	Touzet N.	1			Whole animal (Stuffed)	1867	1332	Brazil	GR	Brazil	Coordinates according to: http://bl.ocks.org/rdmpage/raw/9951904/	-12.607	-54.423	2281819	Shogolev Igor	urn:lsid:catalogueoflife.org:taxon:f8158f11-18fd-11e5-9774-bc764e0806fb:col20150807	Piaya cayana	Animalia	Chordata	Aves	Cuculiformes	Cuculidae	Piaya	cayana	(Linnaeus, 1766)	ICZN	Piaya cayana L. 1766
ZMUA	AVSE	ZMUA_Aves	ZMUA	PreservedSpecimen	2144-1739	GR-ZMUA_Aves-2144-1739	Touzet N.	1			Whole animal (Stuffed)	1867	2144	Brazil	GR	Brazil	Coordinates according to: http://bl.ocks.org/rdmpage/raw/9951904/	-12.607	-54.423	2281819	Shogolev Igor	urn:lsid:catalogueoflife.org:taxon:e7a71c95-18fd-11e5-9774-bc764e0806fb:col20150623	Emberizoides herbicola	Animalia	Chordata	Aves	Passeriformes	Emberizidae	Emberizoides	herbicola	(Vieillot, 1817)	ICZN	Emberizoides herbicola
ZMUA	AVSE	ZMUA_Aves	ZMUA	PreservedSpecimen	2246-1841	GR-ZMUA_Aves-2246-1841	Touzet N.	1			Whole animal (Stuffed)	1867	2246	Brazil	GR	Brazil	Coordinates according to: http://bl.ocks.org/rdmpage/raw/9951904/	-12.607	-54.423	2281819	Shogolev Igor	urn:lsid:catalogueoflife.org:taxon:e7a71c95-18fd-11e5-9774-bc764e0806fb:col20150623	Emberizoides herbicola	Animalia	Chordata	Aves	Passeriformes	Emberizidae	Emberizoides	herbicola	(Vieillot, 1817)	ICZN	Emberizoides herbicola
ZMUA	AVSE	ZMUA_Aves	ZMUA	PreservedSpecimen	2186-1781	GR-ZMUA_Aves-2186-1781	Touzet N.	1			Whole animal (Stuffed)	1867	2186	Brazil	GR	Brazil	Coordinates according to: http://bl.ocks.org/rdmpage/raw/9951904/	-12.607	-54.423	2281819	Shogolev Igor	urn:lsid:catalogueoflife.org:taxon:e7b93318-18fd-11e5-9774-bc764e0806fb:col20150807	Oryzoborus angolensis	Animalia	Chordata	Aves	Passeriformes	Emberizidae	Oryzoborus	angolensis	(Linnaeus, 1766)	ICZN	Oryzoborus angolensis
ZMUA	AVSE	ZMUA_Aves	ZMUA	PreservedSpecimen	2240-1835	GR-ZMUA_Aves-2240-1835	Touzet N.	1			Whole animal (Stuffed)	1867	2240	Brazil	GR	Brazil	Coordinates according to: http://bl.ocks.org/rdmpage/raw/9951904/	-12.607	-54.423	2281819	Shogolev Igor	urn:lsid:catalogueoflife.org:taxon:e7ac2761-18fd-11e5-9774-bc764e0806fb:col20150807	Paroaria dominicana	Animalia	Chordata	Aves	Passeriformes	Emberizidae	Paroaria	dominicana	(Linnaeus, 1758)	ICZN	Paroaria dominicana
ZMUA	AVSE	ZMUA_Aves	ZMUA	PreservedSpecimen	2196-1791	GR-ZMUA_Aves-2196-1791	Touzet N.	1			Whole animal (Stuffed)	1867	2196	Brazil	GR	Brazil	Coordinates according to: http://bl.ocks.org/rdmpage/raw/9951904/	-12.607	-54.423	2281819	Shogolev Igor	urn:lsid:catalogueoflife.org:taxon:e7abbf2f-18fd-11e5-9774-bc764e0806fb:col20150807	Sporophila caerulescens	Animalia	Chordata	Aves	Passeriformes	Emberizidae	Sporophila	caerulescens	(Vieillot, 1823)	ICZN	Sporophila caerulescens
ZMUA	AVSE	ZMUA_Aves	ZMUA	PreservedSpecimen	2289-1884	GR-ZMUA_Aves-2289-1884	Touzet N.	1			Whole animal (Stuffed)	1867	2289	Brazil	GR	Brazil	Coordinates according to: http://bl.ocks.org/rdmpage/raw/9951904/	-12.607	-54.423	2281819	Shogolev Igor	urn:lsid:catalogueoflife.org:taxon:e7abbf2f-18fd-11e5-9774-bc764e0806fb:col20150807	Sporophila caerulescens	Animalia	Chordata	Aves	Passeriformes	Emberizidae	Sporophila	caerulescens	(Vieillot, 1823)	ICZN	Sporophila caerulescens
ZMUA	AVSE	ZMUA_Aves	ZMUA	PreservedSpecimen	2184-1779	GR-ZMUA_Aves-2184-1779	Touzet N.	1			Whole animal (Stuffed)	1867	2184	Brazil	GR	Brazil	Coordinates according to: http://bl.ocks.org/rdmpage/raw/9951904/	-12.607	-54.423	2281819	Shogolev Igor	urn:lsid:catalogueoflife.org:taxon:e7abb1ee-18fd-11e5-9774-bc764e0806fb:col20150807	Sporophila leucoptera	Animalia	Chordata	Aves	Passeriformes	Emberizidae	Sporophila	leucoptera	(Vieillot, 1817)	ICZN	Sporophila leucoptera
ZMUA	AVSE	ZMUA_Aves	ZMUA	PreservedSpecimen	2188-1783	GR-ZMUA_Aves-2188-1783	Touzet N.	1			Whole animal (Stuffed)	1867	2188	Brazil	GR	Brazil	Coordinates according to: http://bl.ocks.org/rdmpage/raw/9951904/	-12.607	-54.423	2281819	Shogolev Igor	urn:lsid:catalogueoflife.org:taxon:e7abb1ee-18fd-11e5-9774-bc764e0806fb:col20150807	Sporophila leucoptera	Animalia	Chordata	Aves	Passeriformes	Emberizidae	Sporophila	leucoptera	(Vieillot, 1817)	ICZN	Sporophila leucoptera
ZMUA	AVSE	ZMUA_Aves	ZMUA	PreservedSpecimen	2267-1862	GR-ZMUA_Aves-2267-1862	Touzet N.	1			Whole animal (Stuffed)	1867	2267	Brazil	GR	Brazil	Coordinates according to: http://bl.ocks.org/rdmpage/raw/9951904/	-12.607	-54.423	2281819	Shogolev Igor	urn:lsid:catalogueoflife.org:taxon:e7b15d34-18fd-11e5-9774-bc764e0806fb:col20150807	Zonotrichia capensis	Animalia	Chordata	Aves	Passeriformes	Emberizidae	Zonotrichia	capensis	(Statius Muller, 1776)	ICZN	Zonotrichia capensis
ZMUA	AVSE	ZMUA_Aves	ZMUA	PreservedSpecimen	2273-1868	GR-ZMUA_Aves-2273-1868	Touzet N.	1			Whole animal (Stuffed)	1867	2273	Brazil	GR	Brazil	Coordinates according to: http://bl.ocks.org/rdmpage/raw/9951904/	-12.607	-54.423	2281819	Shogolev Igor	urn:lsid:catalogueoflife.org:taxon:e7b15d34-18fd-11e5-9774-bc764e0806fb:col20150807	Zonotrichia capensis	Animalia	Chordata	Aves	Passeriformes	Emberizidae	Zonotrichia	capensis	(Statius Muller, 1776)	ICZN	Zonotrichia capensis
ZMUA	AVSE	ZMUA_Aves	ZMUA	PreservedSpecimen	2327-1922	GR-ZMUA_Aves-2327-1922	Touzet N.	1			Whole animal (Stuffed)	1867	2327	Brazil	GR	Brazil	Coordinates according to: http://bl.ocks.org/rdmpage/raw/9951904/	-12.607	-54.423	2281819	Shogolev Igor	urn:lsid:catalogueoflife.org:taxon:e6e45956-18fd-11e5-9774-bc764e0806fb:col20150623	Automolus leucophthalmus	Animalia	Chordata	Aves	Passeriformes	Furnariidae	Automolus	leucophthalmus	(Wied-Neuwied, 1821)	ICZN	Automolus leucophthalmus
ZMUA	AVSE	ZMUA_Aves	ZMUA	PreservedSpecimen	2328-1923	GR-ZMUA_Aves-2328-1923	Touzet N.	1			Whole animal (Stuffed)	1867	2328	Brazil	GR	Brazil	Coordinates according to: http://bl.ocks.org/rdmpage/raw/9951904/	-12.607	-54.423	2281819	Shogolev Igor	urn:lsid:catalogueoflife.org:taxon:e6e45956-18fd-11e5-9774-bc764e0806fb:col20150623	Automolus leucophthalmus	Animalia	Chordata	Aves	Passeriformes	Furnariidae	Automolus	leucophthalmus	(Wied-Neuwied, 1821)	ICZN	Automolus leucophthalmus
ZMUA	AVSE	ZMUA_Aves	ZMUA	PreservedSpecimen	2250-1845	GR-ZMUA_Aves-2250-1845	Touzet N.	1			Whole animal (Stuffed)	1867	2250	Brazil	GR	Brazil	Coordinates according to: http://bl.ocks.org/rdmpage/raw/9951904/	-12.607	-54.423	2281819	Shogolev Igor	urn:lsid:catalogueoflife.org:taxon:e6ef44b0-18fd-11e5-9774-bc764e0806fb:col20150623	Cranioleuca pallida	Animalia	Chordata	Aves	Passeriformes	Furnariidae	Cranioleuca	pallida	(Wied-Neuwied, 1831)	ICZN	Cranioleuca pallida
ZMUA	AVSE	ZMUA_Aves	ZMUA	PreservedSpecimen	2629-2224	GR-ZMUA_Aves-2629-2224	Touzet N.	1			Whole animal (Stuffed)	1867	2629	Brazil	GR	Brazil	Coordinates according to: http://bl.ocks.org/rdmpage/raw/9951904/	-12.607	-54.423	2281819	Shogolev Igor	urn:lsid:catalogueoflife.org:taxon:e6ef0b0e-18fd-11e5-9774-bc764e0806fb:col20150623	Cranioleuca vulpina	Animalia	Chordata	Aves	Passeriformes	Furnariidae	Cranioleuca	vulpina	(Pelzeln, 1856)	ICZN	Cranioleuca vulpina
ZMUA	AVSE	ZMUA_Aves	ZMUA	PreservedSpecimen	2211-1806	GR-ZMUA_Aves-2211-1806	Touzet N.	1			Whole animal (Stuffed)	1867	2211	Brazil	GR	Brazil	Coordinates according to: http://bl.ocks.org/rdmpage/raw/9951904/	-12.607	-54.423	2281819	Shogolev Igor	urn:lsid:catalogueoflife.org:taxon:e7d3e4d4-18fd-11e5-9774-bc764e0806fb:col20150807	Synallaxis gujanensis	Animalia	Chordata	Aves	Passeriformes	Furnariidae	Synallaxis	gujanensis	(Gmelin, 1789)	ICZN	Synallaxis gujanensis
ZMUA	AVSE	ZMUA_Aves	ZMUA	PreservedSpecimen	2213-1808	GR-ZMUA_Aves-2213-1808	Touzet N.	1			Whole animal (Stuffed)	1867	2213	Brazil	GR	Brazil	Coordinates according to: http://bl.ocks.org/rdmpage/raw/9951904/	-12.607	-54.423	2281819	Shogolev Igor	urn:lsid:catalogueoflife.org:taxon:e7b81b45-18fd-11e5-9774-bc764e0806fb:col20150807	Xenops minutus	Animalia	Chordata	Aves	Passeriformes	Furnariidae	Xenops	minutus	(Sparrman, 1788)	ICZN	Xenops minutus
ZMUA	AVSE	ZMUA_Aves	ZMUA	PreservedSpecimen	2215-1810	GR-ZMUA_Aves-2215-1810	Touzet N.	1			Whole animal (Stuffed)	1867	2215	Brazil	GR	Brazil	Coordinates according to: http://bl.ocks.org/rdmpage/raw/9951904/	-12.607	-54.423	2281819	Shogolev Igor	urn:lsid:catalogueoflife.org:taxon:e7b81b45-18fd-11e5-9774-bc764e0806fb:col20150807	Xenops minutus	Animalia	Chordata	Aves	Passeriformes	Furnariidae	Xenops	minutus	(Sparrman, 1788)	ICZN	Xenops minutus
[truncated: 2,123 more rows]
